# Supplementary material for: Global health risk assessment of antibiotic resistance in agricultural soils
Source: Research Square preprint supplement (doi:10.21203/rs.3.rs-7635655/v1), 2025-10-13
Supplement: Supplementary file 1 [file 02184023205b9aba498103c7.xlsx]

## Sheet: Supplementary Table 1
Supplementary Table 1 Imformation of the samples collected in this study
	Accession	BioProject	BioSample	Experiment	Size	Land Use	Continent	Country/Region	Latitude	Longitude	Elevation	Sample name	DOI
1	ERR671910	PRJEB7626	SAMEA3113585	ERX626888	7.80 Gb	wheat	Oceania	Australia	-36.6715	142.289	139	8271_2	—
2	ERR671911	PRJEB7626	SAMEA3113585	ERX626889	7.84 Gb	wheat	Oceania	Australia	-36.6715	142.289	139	8271_2	—
3	ERR671912	PRJEB7626	SAMEA3113584	ERX626890	6.56 Gb	wheat	Oceania	Australia	-36.6715	142.289	139	8270_2	—
4	ERR671913	PRJEB7626	SAMEA3113584	ERX626891	6.59 Gb	wheat	Oceania	Australia	-36.6715	142.289	139	8270_2	—
5	ERR671918	PRJEB7626	SAMEA3113581	ERX626896	7.60 Gb	wheat	Oceania	Australia	-35.1164	141.976	72	8263_2	—
6	ERR671919	PRJEB7626	SAMEA3113581	ERX626897	7.61 Gb	wheat	Oceania	Australia	-35.1164	141.976	72	8263_2	—
7	ERR671920	PRJEB7626	SAMEA3113580	ERX626898	7.61 Gb	wheat	Oceania	Australia	-35.1164	141.976	72	8262_2	—
8	ERR671921	PRJEB7626	SAMEA3113580	ERX626899	7.61 Gb	wheat	Oceania	Australia	-35.1164	141.976	72	8262_2	—
9	ERR687889	PRJEB7626	SAMEA3113580	ERX632832	7.33 Gb	wheat	Oceania	Australia	-35.1164	141.976	72	8262_2	—
10	ERR687890	PRJEB7626	SAMEA3113580	ERX632833	7.27 Gb	wheat	Oceania	Australia	-35.1164	141.976	72	8262_2	—
11	ERR687891	PRJEB7626	SAMEA3113581	ERX632834	7.23 Gb	wheat	Oceania	Australia	-35.1164	141.976	72	8263_2	—
12	ERR687892	PRJEB7626	SAMEA3113581	ERX632835	7.24 Gb	wheat	Oceania	Australia	-35.1164	141.976	72	8263_2	—
13	ERR687897	PRJEB7626	SAMEA3113585	ERX632840	8.11 Gb	wheat	Oceania	Australia	-36.6715	142.289	139	8271_2	—
14	ERR687898	PRJEB7626	SAMEA3113585	ERX632841	8.06 Gb	wheat	Oceania	Australia	-36.6715	142.289	139	8271_2	—
15	SRR1025217	PRJNA225837	SAMN02389641	SRX373544	1.65 Gb	others	Asia	China	30.1	92.2303	4268	F1U	10.1186/1471-2164-14-820
16	SRR1025218	PRJNA225837	SAMN02389642	SRX373545	2.63 Gb	others	Asia	China	30.1	92.2303	4268	F1L	10.1186/1471-2164-14-820
17	SRR1026843	PRJNA225837	SAMN02389584	SRX374551	1.44 Gb	others	Asia	China	29.6656	91.31	3690	F2L	10.1186/1471-2164-14-820
18	SRR1026845	PRJNA225837	SAMN02389643	SRX374552	1.80 Gb	others	Asia	China	29.6633	91.3	3693	F3U	10.1186/1471-2164-14-820
19	SRR1026846	PRJNA225837	SAMN02389644	SRX374555	2.17 Gb	others	Asia	China	29.6633	91.3	3693	F3L	10.1186/1471-2164-14-820
20	SRR1026856	PRJNA225837	SAMN02389529	SRX371695	1.47 Gb	others	Asia	China	29.6656	91.31	3690	F2U	10.1186/1471-2164-14-820
21	SRR22278226	PRJNA900430	SAMN31691844	SRX18252419	3.53 Gb	fruit	South America	Brazil	-21.1664	-47.99	—	SAgri	10.3390/antibiotics12020334
22	SRR22278227	PRJNA900430	SAMN31691843	SRX18252418	5.11 Gb	fruit	South America	Brazil	-21.9267	-47.8701	—	SOrch	10.3390/antibiotics12020334
23	SRR22278230	PRJNA900430	SAMN31691840	SRX18252415	4.11 Gb	livesotck & poultry	South America	Brazil	-21.1651	-47.8594	—	SLawn	10.3390/antibiotics12020334
24	SRR22278231	PRJNA900430	SAMN31691839	SRX18252414	5.36 Gb	livesotck & poultry	South America	Brazil	-21.4807	-48.5412	—	SCatt	10.3390/antibiotics12020334
25	SRR22278232	PRJNA900430	SAMN31691838	SRX18252413	4.54 Gb	livesotck & poultry	South America	Brazil	-21.9513	-47.8908	—	SHen	10.3390/antibiotics12020334
26	SRR22318749	PRJNA902510	SAMN31762481	SRX18292006	3.19 Gb	maize	Asia	China	37.42	107.13	—	Abandoned soil	10.1016/j.catena.2022.106299
27	SRR22318750	PRJNA902510	SAMN31762480	SRX18292005	3.51 Gb	maize	Asia	China	37.42	107.13	—	Alfalfa field soil	10.1016/j.catena.2022.106299
28	SRR22318751	PRJNA902510	SAMN31762479	SRX18292004	3.41 Gb	maize	Asia	China	37.42	107.13	—	Corn field soil	10.1016/j.catena.2022.106299
29	SRR19663813	PRJNA849167	SAMN29042204	SRX15713247	2.95 Gb	livesotck & poultry	South America	Brazil	-3.12914	-54.9543	—	P1	10.1128/MRA.00804-22
30	SRR19769806	PRJNA842732	SAMN28768664	SRX15814439	5.03 Gb	livesotck & poultry	South America	Brazil	-3.31297	-54.9097	—	M_A13	—
31	SRR24041370	PRJNA950935	SAMN34032563	SRX19843335	11.80 Gb	rice	Asia	China	27.52	109.21	—	SK_TS	10.1038/S43705-023-00277-X
32	SRR24041371	PRJNA950935	SAMN34032562	SRX19843334	13.49 Gb	rice	Asia	China	27.52	109.21	—	SK_S	10.1038/S43705-023-00277-X
33	SRR24041373	PRJNA950935	SAMN34032560	SRX19843332	12.64 Gb	rice	Asia	China	27.56	109.19	—	GX_TS	10.1038/S43705-023-00277-X
34	SRR24041374	PRJNA950935	SAMN34032559	SRX19843331	12.75 Gb	rice	Asia	China	27.56	109.19	—	GX_S	10.1038/S43705-023-00277-X
35	SRR24041375	PRJNA950935	SAMN34032558	SRX19843330	12.35 Gb	rice	Asia	China	27.56	109.19	—	GX_NS	10.1038/S43705-023-00277-X
36	SRR24041376	PRJNA950935	SAMN34032557	SRX19843329	10.60 Gb	rice	Asia	China	26.42	106.52	—	HX_TS	10.1038/S43705-023-00277-X
37	SRR24041377	PRJNA950935	SAMN34032556	SRX19843328	11.44 Gb	rice	Asia	China	26.42	106.52	—	HX_S	10.1038/S43705-023-00277-X
38	SRR24041378	PRJNA950935	SAMN34032555	SRX19843327	11.21 Gb	rice	Asia	China	26.42	106.52	—	HX_NS	10.1038/S43705-023-00277-X
39	SRR5260067	PRJNA370748	SAMN06297438	SRX2564776	2.08 Gb	rice	North America	United States	38.1087	-121.653	—	AHUHA	—
40	SRR5260069	PRJNA370754	SAMN06297444	SRX2564778	2.69 Gb	rice	North America	United States	38.1087	-121.653	—	AHUHO	—
41	SRR5260070	PRJNA371221	SAMN06297441	SRX2564779	2.38 Gb	rice	North America	United States	38.1087	-121.653	—	AHUHG	—
42	SRR5260071	PRJNA370749	SAMN06297439	SRX2564780	2.40 Gb	rice	North America	United States	38.1087	-121.653	—	AHUHB	—
43	SRR5260073	PRJNA370752	SAMN06297442	SRX2564782	2.13 Gb	rice	North America	United States	38.1087	-121.653	—	AHUHH	—
44	SRR5260182	PRJNA370758	SAMN06297448	SRX2564880	2.45 Gb	rice	North America	United States	38.1087	-121.653	—	AHUHU	—
45	SRR5260183	PRJNA370755	SAMN06297445	SRX2564881	2.69 Gb	rice	North America	United States	38.1087	-121.653	—	AHUHP	—
46	SRR5260184	PRJNA370756	SAMN06297446	SRX2564882	2.18 Gb	rice	North America	United States	38.1087	-121.653	—	AHUHS	—
47	SRR5260185	PRJNA370760	SAMN06297450	SRX2564883	2.33 Gb	rice	North America	United States	38.1087	-121.653	—	AHUHX	—
48	SRR5260186	PRJNA370761	SAMN06297451	SRX2564884	2.30 Gb	rice	North America	United States	38.1087	-121.653	—	AHUHY	—
49	SRR5260187	PRJNA370757	SAMN06297447	SRX2564885	2.20 Gb	rice	North America	United States	38.1087	-121.653	—	AHUHT	—
50	SRR5260188	PRJNA370759	SAMN06297449	SRX2564886	2.30 Gb	rice	North America	United States	38.1087	-121.653	—	AHUHW	—
51	SRR5260217	PRJNA370762	SAMN06297452	SRX2564897	2.49 Gb	rice	North America	United States	38.1087	-121.653	—	AHUNZ	—
52	SRR5260272	PRJNA370764	SAMN06297454	SRX2564939	2.20 Gb	rice	North America	United States	38.1087	-121.653	—	AHUNB	—
53	SRR5260273	PRJNA370763	SAMN06297453	SRX2564940	2.17 Gb	rice	North America	United States	38.1087	-121.653	—	AHUNA	—
54	SRR5260274	PRJNA370766	SAMN06297456	SRX2564941	2.38 Gb	rice	North America	United States	38.1087	-121.653	—	AHUNG	—
55	SRR5260275	PRJNA370765	SAMN06297455	SRX2564942	2.34 Gb	rice	North America	United States	38.1087	-121.653	—	AHUNC	—
56	SRR5259830	PRJNA37039	SAMN06297429	SRX2564561	2.71 Gb	rice	North America	United States	38.1087	-121.653	—	AHUGO	—
57	SRR5259839	PRJNA370742	SAMN06297432	SRX2564570	3.20 Gb	rice	North America	United States	38.1087	-121.653	—	AHUGT	—
58	SRR5259938	PRJNA370745	SAMN06297435	SRX2564678	2.42 Gb	rice	North America	United States	38.1087	-121.653	—	AHUGX	—
59	SRR5259939	PRJNA370746	SAMN06297436	SRX2564679	2.82 Gb	rice	North America	United States	38.1087	-121.653	—	AHUGY	—
60	SRR5259940	PRJNA370747	SAMN06297437	SRX2564680	2.53 Gb	rice	North America	United States	38.1087	-121.653	—	AHUGZ	—
61	SRR14373440	PRJNA689669	SAMN18780065	SRX10725852	2.33 Gb	fruit	Asia	China	23.3	102.7	—	sample_100	10.1016/j.scitotenv.2022.158397
62	SRR14373441	PRJNA689669	SAMN18780063	SRX10725851	3.08 Gb	fruit	Asia	China	23.3	102.69	—	sample_99	10.1016/j.scitotenv.2022.158397
63	SRR14373442	PRJNA689669	SAMN18780062	SRX10725850	2.33 Gb	fruit	Asia	China	23.3	102.68	—	sample_98	10.1016/j.scitotenv.2022.158397
64	SRR14373443	PRJNA689669	SAMN18780061	SRX10725849	3.43 Gb	fruit	Asia	China	23.3	102.67	—	sample_97	10.1016/j.scitotenv.2022.158397
65	SRR14373444	PRJNA689669	SAMN18780060	SRX10725848	3.08 Gb	fruit	Asia	China	23.3	102.66	—	sample_96	10.1016/j.scitotenv.2022.158397
66	SRR14373445	PRJNA689669	SAMN18780059	SRX10725847	3.96 Gb	fruit	Asia	China	23.3	102.65	—	sample_95	10.1016/j.scitotenv.2022.158397
67	SRR14373446	PRJNA689669	SAMN18780058	SRX10725846	3.64 Gb	fruit	Asia	China	23.3	102.64	—	sample_94	10.1016/j.scitotenv.2022.158397
68	SRR14373447	PRJNA689669	SAMN18780055	SRX10725845	4.20 Gb	fruit	Asia	China	23.3	102.63	—	sample_93	10.1016/j.scitotenv.2022.158397
69	SRR14373448	PRJNA689669	SAMN18780054	SRX10725844	4.18 Gb	fruit	Asia	China	23.3	102.62	—	sample_92	10.1016/j.scitotenv.2022.158397
70	SRR14373449	PRJNA689669	SAMN18780057	SRX10725843	3.03 Gb	fruit	Asia	China	23.3	102.61	—	sample_91	10.1016/j.scitotenv.2022.158397
71	SRR14373450	PRJNA689669	SAMN18753809	SRX10725842	2.53 Gb	fruit	Asia	China	23.41	102.25	—	sample_10	10.1016/j.scitotenv.2022.158397
72	SRR14373451	PRJNA689669	SAMN18780056	SRX10725841	4.19 Gb	fruit	Asia	China	23.3	102.6	—	sample_90	10.1016/j.scitotenv.2022.158397
73	SRR14373452	PRJNA689669	SAMN18780053	SRX10725840	3.39 Gb	fruit	Asia	China	23.3	102.59	—	sample_89	10.1016/j.scitotenv.2022.158397
74	SRR14373453	PRJNA689669	SAMN18780052	SRX10725839	2.58 Gb	fruit	Asia	China	23.3	102.58	—	sample_88	10.1016/j.scitotenv.2022.158397
75	SRR14373454	PRJNA689669	SAMN18780051	SRX10725838	2.27 Gb	fruit	Asia	China	23.3	102.57	—	sample_87	10.1016/j.scitotenv.2022.158397
76	SRR14373455	PRJNA689669	SAMN18780050	SRX10725837	2.03 Gb	fruit	Asia	China	23.3	102.56	—	sample_86	10.1016/j.scitotenv.2022.158397
77	SRR14373456	PRJNA689669	SAMN18780040	SRX10725836	2.28 Gb	fruit	Asia	China	23.3	102.55	—	sample_85	10.1016/j.scitotenv.2022.158397
78	SRR14373457	PRJNA689669	SAMN18780039	SRX10725835	2.23 Gb	fruit	Asia	China	23.3	102.54	—	sample_84	10.1016/j.scitotenv.2022.158397
79	SRR14373458	PRJNA689669	SAMN18780038	SRX10725834	2.08 Gb	fruit	Asia	China	23.3	102.53	—	sample_83	10.1016/j.scitotenv.2022.158397
80	SRR14373459	PRJNA689669	SAMN18780037	SRX10725833	2.31 Gb	fruit	Asia	China	23.3	102.52	—	sample_82	10.1016/j.scitotenv.2022.158397
81	SRR14373460	PRJNA689669	SAMN18780009	SRX10725832	2.55 Gb	fruit	Asia	China	23.3	102.51	—	sample_81	10.1016/j.scitotenv.2022.158397
82	SRR14373461	PRJNA689669	SAMN18753808	SRX10725831	1.83 Gb	fruit	Asia	China	23.4	102.25	—	sample_9	10.1016/j.scitotenv.2022.158397
83	SRR14373462	PRJNA689669	SAMN18780008	SRX10725830	2.17 Gb	fruit	Asia	China	23.3	102.5	—	sample_80	10.1016/j.scitotenv.2022.158397
84	SRR14373463	PRJNA689669	SAMN18780007	SRX10725829	1.96 Gb	fruit	Asia	China	23.3	102.49	—	sample_79	10.1016/j.scitotenv.2022.158397
85	SRR14373464	PRJNA689669	SAMN18780006	SRX10725828	2.58 Gb	fruit	Asia	China	23.3	102.48	—	sample_78	10.1016/j.scitotenv.2022.158397
86	SRR14373465	PRJNA689669	SAMN18779999	SRX10725827	2.52 Gb	fruit	Asia	China	23.3	102.47	—	sample_77	10.1016/j.scitotenv.2022.158397
87	SRR14373466	PRJNA689669	SAMN18779998	SRX10725826	1.57 Gb	fruit	Asia	China	23.3	102.46	—	sample_76	10.1016/j.scitotenv.2022.158397
88	SRR14373467	PRJNA689669	SAMN18779996	SRX10725825	2.25 Gb	fruit	Asia	China	23.3	102.45	—	sample_75	10.1016/j.scitotenv.2022.158397
89	SRR14373468	PRJNA689669	SAMN18779995	SRX10725824	2.02 Gb	fruit	Asia	China	23.3	102.44	—	sample_74	10.1016/j.scitotenv.2022.158397
90	SRR14373469	PRJNA689669	SAMN18779994	SRX10725823	2.10 Gb	fruit	Asia	China	23.3	102.43	—	sample_73	10.1016/j.scitotenv.2022.158397
91	SRR14373470	PRJNA689669	SAMN18779993	SRX10725822	1.83 Gb	fruit	Asia	China	23.3	102.42	—	sample_72	10.1016/j.scitotenv.2022.158397
92	SRR14373471	PRJNA689669	SAMN18779901	SRX10725821	2.54 Gb	fruit	Asia	China	23.3	102.41	—	sample_71	10.1016/j.scitotenv.2022.158397
93	SRR14373472	PRJNA689669	SAMN18753805	SRX10725820	2.10 Gb	fruit	Asia	China	23.41	102.25	—	sample_8	10.1016/j.scitotenv.2022.158397
94	SRR14373473	PRJNA689669	SAMN18779900	SRX10725819	2.29 Gb	fruit	Asia	China	23.42	102.25	—	sample_70	10.1016/j.scitotenv.2022.158397
95	SRR14373474	PRJNA689669	SAMN18779897	SRX10725818	4.01 Gb	fruit	Asia	China	23.42	102.25	—	sample_69	10.1016/j.scitotenv.2022.158397
96	SRR14373475	PRJNA689669	SAMN18779896	SRX10725817	3.51 Gb	fruit	Asia	China	23.42	102.26	—	sample_68	10.1016/j.scitotenv.2022.158397
97	SRR14373476	PRJNA689669	SAMN18779895	SRX10725816	4.15 Gb	fruit	Asia	China	23.42	102.26	—	sample_67	10.1016/j.scitotenv.2022.158397
98	SRR14373477	PRJNA689669	SAMN18779894	SRX10725815	3.22 Gb	fruit	Asia	China	23.42	102.26	—	sample_66	10.1016/j.scitotenv.2022.158397
99	SRR14373478	PRJNA689669	SAMN18779893	SRX10725814	4.05 Gb	fruit	Asia	China	23.42	102.26	—	sample_65	10.1016/j.scitotenv.2022.158397
100	SRR14373479	PRJNA689669	SAMN18779892	SRX10725813	2.09 Gb	fruit	Asia	China	23.42	102.26	—	sample_64	10.1016/j.scitotenv.2022.158397
101	SRR14373480	PRJNA689669	SAMN18779891	SRX10725812	4.02 Gb	fruit	Asia	China	23.42	102.26	—	sample_63	10.1016/j.scitotenv.2022.158397
102	SRR14373481	PRJNA689669	SAMN18779890	SRX10725811	3.13 Gb	fruit	Asia	China	23.42	102.26	—	sample_62	10.1016/j.scitotenv.2022.158397
103	SRR14373482	PRJNA689669	SAMN18779889	SRX10725810	4.00 Gb	fruit	Asia	China	23.42	102.26	—	sample_61	10.1016/j.scitotenv.2022.158397
104	SRR14373483	PRJNA689669	SAMN18753804	SRX10725809	3.74 Gb	fruit	Asia	China	23.41	102.25	—	sample_7	10.1016/j.scitotenv.2022.158397
105	SRR14373484	PRJNA689669	SAMN18779888	SRX10725808	3.76 Gb	fruit	Asia	China	23.42	102.26	—	sample_60	10.1016/j.scitotenv.2022.158397
106	SRR14373485	PRJNA689669	SAMN18779887	SRX10725807	3.31 Gb	fruit	Asia	China	23.42	102.26	—	sample_59	10.1016/j.scitotenv.2022.158397
107	SRR14373486	PRJNA689669	SAMN18779886	SRX10725806	2.26 Gb	fruit	Asia	China	23.43	102.27	—	sample_58	10.1016/j.scitotenv.2022.158397
108	SRR14373487	PRJNA689669	SAMN18779885	SRX10725805	4.03 Gb	fruit	Asia	China	23.43	102.27	—	sample_57	10.1016/j.scitotenv.2022.158397
109	SRR14373488	PRJNA689669	SAMN18779884	SRX10725804	2.28 Gb	fruit	Asia	China	23.42	102.27	—	sample_56	10.1016/j.scitotenv.2022.158397
110	SRR14373489	PRJNA689669	SAMN18779883	SRX10725803	3.44 Gb	fruit	Asia	China	23.42	102.27	—	sample_55	10.1016/j.scitotenv.2022.158397
111	SRR14373490	PRJNA689669	SAMN18779882	SRX10725802	3.81 Gb	fruit	Asia	China	23.43	102.26	—	sample_54	10.1016/j.scitotenv.2022.158397
112	SRR14373491	PRJNA689669	SAMN18779881	SRX10725801	3.92 Gb	fruit	Asia	China	23.43	102.26	—	sample_53	10.1016/j.scitotenv.2022.158397
113	SRR14373492	PRJNA689669	SAMN18779880	SRX10725800	3.14 Gb	fruit	Asia	China	23.42	102.27	—	sample_52	10.1016/j.scitotenv.2022.158397
114	SRR14373493	PRJNA689669	SAMN18779879	SRX10725799	4.07 Gb	fruit	Asia	China	23.42	102.27	—	sample_51	10.1016/j.scitotenv.2022.158397
115	SRR14373494	PRJNA689669	SAMN18753801	SRX10725798	2.68 Gb	fruit	Asia	China	23.4	102.25	—	sample_6	10.1016/j.scitotenv.2022.158397
116	SRR14373495	PRJNA689669	SAMN18779878	SRX10725797	2.24 Gb	fruit	Asia	China	23.43	102.26	—	sample_50	10.1016/j.scitotenv.2022.158397
117	SRR14373496	PRJNA689669	SAMN18779877	SRX10725796	3.99 Gb	fruit	Asia	China	23.43	102.26	—	sample_49	10.1016/j.scitotenv.2022.158397
118	SRR14373497	PRJNA689669	SAMN18779876	SRX10725795	3.58 Gb	fruit	Asia	China	23.43	102.27	—	sample_48	10.1016/j.scitotenv.2022.158397
119	SRR14373498	PRJNA689669	SAMN18779875	SRX10725794	3.98 Gb	fruit	Asia	China	23.43	102.27	—	sample_47	10.1016/j.scitotenv.2022.158397
120	SRR14373499	PRJNA689669	SAMN18779874	SRX10725793	2.87 Gb	fruit	Asia	China	23.4	102.25	—	sample_46	10.1016/j.scitotenv.2022.158397
121	SRR14373500	PRJNA689669	SAMN18779868	SRX10725792	3.67 Gb	fruit	Asia	China	23.4	102.25	—	sample_45	10.1016/j.scitotenv.2022.158397
122	SRR14373501	PRJNA689669	SAMN18779867	SRX10725791	4.55 Gb	fruit	Asia	China	23.41	102.25	—	sample_44	10.1016/j.scitotenv.2022.158397
123	SRR14373502	PRJNA689669	SAMN18779855	SRX10725790	4.14 Gb	fruit	Asia	China	23.41	102.25	—	sample_43	10.1016/j.scitotenv.2022.158397
124	SRR14373503	PRJNA689669	SAMN18779854	SRX10725789	1.94 Gb	fruit	Asia	China	23.4	102.25	—	sample_42	10.1016/j.scitotenv.2022.158397
125	SRR14373504	PRJNA689669	SAMN18779853	SRX10725788	3.15 Gb	fruit	Asia	China	23.4	102.25	—	sample_41	10.1016/j.scitotenv.2022.158397
126	SRR14373505	PRJNA689669	SAMN18753800	SRX10725787	2.11 Gb	fruit	Asia	China	23.41	102.25	—	sample_5	10.1016/j.scitotenv.2022.158397
127	SRR14373506	PRJNA689669	SAMN18779852	SRX10725786	4.08 Gb	fruit	Asia	China	23.41	102.25	—	sample_40	10.1016/j.scitotenv.2022.158397
128	SRR14373507	PRJNA689669	SAMN18779848	SRX10725785	4.25 Gb	fruit	Asia	China	23.41	102.25	—	sample_39	10.1016/j.scitotenv.2022.158397
129	SRR14373508	PRJNA689669	SAMN18779847	SRX10725784	3.77 Gb	fruit	Asia	China	23.4	102.25	—	sample_38	10.1016/j.scitotenv.2022.158397
130	SRR14373509	PRJNA689669	SAMN18779843	SRX10725783	4.79 Gb	fruit	Asia	China	23.4	102.25	—	sample_37	10.1016/j.scitotenv.2022.158397
131	SRR14373510	PRJNA689669	SAMN18779842	SRX10725782	2.49 Gb	fruit	Asia	China	23.41	102.25	—	sample_36	10.1016/j.scitotenv.2022.158397
132	SRR14373511	PRJNA689669	SAMN18779841	SRX10725781	3.94 Gb	fruit	Asia	China	23.41	102.25	—	sample_35	10.1016/j.scitotenv.2022.158397
133	SRR14373512	PRJNA689669	SAMN18779840	SRX10725780	4.04 Gb	fruit	Asia	China	23.42	102.25	—	sample_34	10.1016/j.scitotenv.2022.158397
134	SRR14373513	PRJNA689669	SAMN18779839	SRX10725779	2.45 Gb	fruit	Asia	China	23.42	102.26	—	sample_33	10.1016/j.scitotenv.2022.158397
135	SRR14373514	PRJNA689669	SAMN18779838	SRX10725778	2.04 Gb	fruit	Asia	China	23.42	102.25	—	sample_32	10.1016/j.scitotenv.2022.158397
136	SRR14373515	PRJNA689669	SAMN18779837	SRX10725777	2.57 Gb	fruit	Asia	China	23.42	102.26	—	sample_31	10.1016/j.scitotenv.2022.158397
137	SRR14373516	PRJNA689669	SAMN18753785	SRX10725776	2.00 Gb	fruit	Asia	China	23.4	102.25	—	sample_4	10.1016/j.scitotenv.2022.158397
138	SRR14373517	PRJNA689669	SAMN18779836	SRX10725775	2.29 Gb	fruit	Asia	China	23.42	102.26	—	sample_30	10.1016/j.scitotenv.2022.158397
139	SRR14373518	PRJNA689669	SAMN18779835	SRX10725774	2.73 Gb	fruit	Asia	China	23.42	102.26	—	sample_29	10.1016/j.scitotenv.2022.158397
140	SRR14373519	PRJNA689669	SAMN18779834	SRX10725773	2.62 Gb	fruit	Asia	China	23.42	102.26	—	sample_28	10.1016/j.scitotenv.2022.158397
141	SRR14373520	PRJNA689669	SAMN18779833	SRX10725772	2.55 Gb	fruit	Asia	China	23.42	102.26	—	sample_27	10.1016/j.scitotenv.2022.158397
142	SRR14373521	PRJNA689669	SAMN18779832	SRX10725771	3.60 Gb	fruit	Asia	China	23.42	102.26	—	sample_26	10.1016/j.scitotenv.2022.158397
143	SRR14373522	PRJNA689669	SAMN18779831	SRX10725770	3.57 Gb	fruit	Asia	China	23.42	102.26	—	sample_25	10.1016/j.scitotenv.2022.158397
144	SRR14373523	PRJNA689669	SAMN18779830	SRX10725769	1.83 Gb	fruit	Asia	China	23.42	102.26	—	sample_24	10.1016/j.scitotenv.2022.158397
145	SRR14373524	PRJNA689669	SAMN18779829	SRX10725768	2.34 Gb	fruit	Asia	China	23.42	102.26	—	sample_23	10.1016/j.scitotenv.2022.158397
146	SRR14373525	PRJNA689669	SAMN18779828	SRX10725767	2.10 Gb	fruit	Asia	China	23.43	102.27	—	sample_22	10.1016/j.scitotenv.2022.158397
147	SRR14373526	PRJNA689669	SAMN18779827	SRX10725766	2.43 Gb	fruit	Asia	China	23.42	102.27	—	sample_21	10.1016/j.scitotenv.2022.158397
148	SRR14373527	PRJNA689669	SAMN18753784	SRX10725765	2.68 Gb	fruit	Asia	China	23.41	102.25	—	sample_3	10.1016/j.scitotenv.2022.158397
149	SRR14373528	PRJNA689669	SAMN18779826	SRX10725764	1.80 Gb	fruit	Asia	China	23.43	102.27	—	sample_20	10.1016/j.scitotenv.2022.158397
150	SRR14373529	PRJNA689669	SAMN18779825	SRX10725763	2.71 Gb	fruit	Asia	China	23.42	102.27	—	sample_19	10.1016/j.scitotenv.2022.158397
151	SRR14373530	PRJNA689669	SAMN18779824	SRX10725762	2.34 Gb	fruit	Asia	China	23.43	102.26	—	sample_18	10.1016/j.scitotenv.2022.158397
152	SRR14373531	PRJNA689669	SAMN18779823	SRX10725761	2.32 Gb	fruit	Asia	China	23.42	102.27	—	sample_17	10.1016/j.scitotenv.2022.158397
153	SRR14373532	PRJNA689669	SAMN18779821	SRX10725760	2.48 Gb	fruit	Asia	China	23.43	102.26	—	sample_16	10.1016/j.scitotenv.2022.158397
154	SRR14373533	PRJNA689669	SAMN18779820	SRX10725759	2.54 Gb	fruit	Asia	China	23.42	102.27	—	sample_15	10.1016/j.scitotenv.2022.158397
155	SRR14373534	PRJNA689669	SAMN18753844	SRX10725758	1.94 Gb	fruit	Asia	China	23.43	102.26	—	sample_14	10.1016/j.scitotenv.2022.158397
156	SRR14373535	PRJNA689669	SAMN18753843	SRX10725757	2.01 Gb	fruit	Asia	China	23.43	102.27	—	sample_13	10.1016/j.scitotenv.2022.158397
157	SRR14373536	PRJNA689669	SAMN18753842	SRX10725756	2.86 Gb	fruit	Asia	China	23.43	102.26	—	sample_12	10.1016/j.scitotenv.2022.158397
158	SRR14373537	PRJNA689669	SAMN18780071	SRX10725755	2.47 Gb	fruit	Asia	China	23.3	102.76	—	sample_106	10.1016/j.scitotenv.2022.158397
159	SRR14373538	PRJNA689669	SAMN18780070	SRX10725754	4.00 Gb	fruit	Asia	China	23.3	102.75	—	sample_105	10.1016/j.scitotenv.2022.158397
160	SRR14373539	PRJNA689669	SAMN18780069	SRX10725753	3.40 Gb	fruit	Asia	China	23.3	102.74	—	sample_104	10.1016/j.scitotenv.2022.158397
161	SRR14373540	PRJNA689669	SAMN18780068	SRX10725752	2.52 Gb	fruit	Asia	China	23.3	102.73	—	sample_103	10.1016/j.scitotenv.2022.158397
162	SRR14373541	PRJNA689669	SAMN18780067	SRX10725751	2.12 Gb	fruit	Asia	China	23.3	102.72	—	sample_102	10.1016/j.scitotenv.2022.158397
163	SRR14373542	PRJNA689669	SAMN18780066	SRX10725750	3.81 Gb	fruit	Asia	China	23.3	102.71	—	sample_101	10.1016/j.scitotenv.2022.158397
164	SRR14373543	PRJNA689669	SAMN18753841	SRX10725749	3.76 Gb	fruit	Asia	China	23.43	102.27	—	sample_11	10.1016/j.scitotenv.2022.158397
165	SRR14373544	PRJNA689669	SAMN18752699	SRX10725748	2.60 Gb	fruit	Asia	China	23.4	102.25	—	samp_H101_1T	10.1016/j.scitotenv.2022.158397
166	SRR14373545	PRJNA689669	SAMN18752698	SRX10725747	2.35 Gb	fruit	Asia	China	23.41	102.25	—	samp_H101_1G	10.1016/j.scitotenv.2022.158397
167	SRR19631092	PRJNA848116	SAMN28984352	SRX15681710	1.88 Gb	livesotck & poultry	Asia	China	25	118	—	ZZS3	10.3389/fmicb.2021.716393
168	SRR19631098	PRJNA848116	SAMN28984346	SRX15681704	908.20 Mb	livesotck & poultry	Asia	China	33	120	—	YCS4	10.3389/fmicb.2021.716393
169	SRR19631099	PRJNA848116	SAMN28984345	SRX15681703	1.03 Gb	livesotck & poultry	Asia	China	33	120	—	YCS3	10.3389/fmicb.2021.716393
170	SRR19631101	PRJNA848116	SAMN28984344	SRX15681701	1.03 Gb	livesotck & poultry	Asia	China	33	120	—	YCS2	10.3389/fmicb.2021.716393
171	SRR19631102	PRJNA848116	SAMN28984343	SRX15681700	793.02 Mb	livesotck & poultry	Asia	China	33	120	—	YCS1	10.3389/fmicb.2021.716393
172	SRR19631108	PRJNA848116	SAMN28984337	SRX15681694	2.25 Gb	livesotck & poultry	Asia	China	34	117	—	XZS4	10.3389/fmicb.2021.716393
173	SRR19631109	PRJNA848116	SAMN28984336	SRX15681693	2.06 Gb	livesotck & poultry	Asia	China	34	117	—	XZS2	10.3389/fmicb.2021.716393
174	SRR19631110	PRJNA848116	SAMN28984335	SRX15681692	2.06 Gb	livesotck & poultry	Asia	China	34	117	—	XZS1	10.3389/fmicb.2021.716393
175	SRR19631111	PRJNA848116	SAMN28984281	SRX15681691	1.19 Gb	livesotck & poultry	Asia	China	29	120	—	JHS5	10.3389/fmicb.2021.716393
176	SRR19631118	PRJNA848116	SAMN28984328	SRX15681684	1.02 Gb	livesotck & poultry	Asia	China	28	121	—	WZS4	10.3389/fmicb.2021.716393
177	SRR19631119	PRJNA848116	SAMN28984327	SRX15681683	1.14 Gb	livesotck & poultry	Asia	China	28	121	—	WZS3	10.3389/fmicb.2021.716393
178	SRR19631120	PRJNA848116	SAMN28984326	SRX15681682	994.44 Mb	livesotck & poultry	Asia	China	28	121	—	WZS2	10.3389/fmicb.2021.716393
179	SRR19631121	PRJNA848116	SAMN28984325	SRX15681681	1.10 Gb	livesotck & poultry	Asia	China	28	121	—	WZS1	10.3389/fmicb.2021.716393
180	SRR19631122	PRJNA848116	SAMN28984280	SRX15681680	1.01 Gb	livesotck & poultry	Asia	China	29	120	—	JHS3	10.3389/fmicb.2021.716393
181	SRR19631126	PRJNA848116	SAMN28984321	SRX15681676	2.07 Gb	livesotck & poultry	Asia	China	36	119	—	WFS4	10.3389/fmicb.2021.716393
182	SRR19631127	PRJNA848116	SAMN28984320	SRX15681675	1.97 Gb	livesotck & poultry	Asia	China	36	119	—	WFS3	10.3389/fmicb.2021.716393
183	SRR19631128	PRJNA848116	SAMN28984319	SRX15681674	2.11 Gb	livesotck & poultry	Asia	China	36	119	—	WFS2	10.3389/fmicb.2021.716393
184	SRR19631129	PRJNA848116	SAMN28984318	SRX15681673	2.04 Gb	livesotck & poultry	Asia	China	36	119	—	WFS1	10.3389/fmicb.2021.716393
185	SRR19631133	PRJNA848116	SAMN28984279	SRX15681669	1.12 Gb	livesotck & poultry	Asia	China	29	120	—	JHS2	10.3389/fmicb.2021.716393
186	SRR19631137	PRJNA848116	SAMN28984311	SRX15681665	2.61 Gb	livesotck & poultry	Asia	China	23	113	—	SSS4	10.3389/fmicb.2021.716393
187	SRR19631138	PRJNA848116	SAMN28984310	SRX15681664	1.86 Gb	livesotck & poultry	Asia	China	23	113	—	SSS2	10.3389/fmicb.2021.716393
188	SRR19631139	PRJNA848116	SAMN28984309	SRX15681663	1.94 Gb	livesotck & poultry	Asia	China	23	113	—	SSS1	10.3389/fmicb.2021.716393
189	SRR19631144	PRJNA848116	SAMN28984278	SRX15681658	966.81 Mb	livesotck & poultry	Asia	China	29	120	—	JHS1	10.3389/fmicb.2021.716393
190	SRR19631147	PRJNA848116	SAMN28984302	SRX15681655	1.99 Gb	livesotck & poultry	Asia	China	24.4736	118.115	—	QZS4	10.3389/fmicb.2021.716393
191	SRR19631148	PRJNA848116	SAMN28984301	SRX15681654	2.68 Gb	livesotck & poultry	Asia	China	24.4736	118.115	—	QZS3	10.3389/fmicb.2021.716393
192	SRR19631149	PRJNA848116	SAMN28984300	SRX15681653	2.09 Gb	livesotck & poultry	Asia	China	24.4736	118.115	—	QZS2	10.3389/fmicb.2021.716393
193	SRR19631150	PRJNA848116	SAMN28984299	SRX15681652	1.93 Gb	livesotck & poultry	Asia	China	24.4736	118.115	—	QZS1	10.3389/fmicb.2021.716393
194	SRR19631158	PRJNA848116	SAMN28984292	SRX15681644	2.06 Gb	livesotck & poultry	Asia	China	22	110	—	MMS4	10.3389/fmicb.2021.716393
195	SRR19631159	PRJNA848116	SAMN28984291	SRX15681643	1.79 Gb	livesotck & poultry	Asia	China	22	110	—	MMS2	10.3389/fmicb.2021.716393
196	SRR19631160	PRJNA848116	SAMN28984290	SRX15681642	2.11 Gb	livesotck & poultry	Asia	China	22	110	—	MMS1	10.3389/fmicb.2021.716393
197	SRR12915122	PRJNA671703	SAMN16546630	SRX9379910	696.87 Mb	maize	North America	United States	44.677	-90.177	—	SoilDepth12in_02	10.1128/mBio.00798-21
198	SRR12915123	PRJNA671703	SAMN16546555	SRX9379909	796.94 Mb	maize	North America	United States	44.677	-90.177	—	SoilDepth6in_02	10.1128/mBio.00798-21
199	SRR12915127	PRJNA671703	SAMN16546635	SRX9379905	700.63 Mb	maize	North America	United States	44.677	-90.177	—	SoilDepth12in_07	10.1128/mBio.00798-21
200	SRR12915128	PRJNA671703	SAMN16546560	SRX9379904	678.40 Mb	maize	North America	United States	44.677	-90.177	—	SoilDepth6in_07	10.1128/mBio.00798-21
201	SRR12915133	PRJNA671703	SAMN16546640	SRX9379899	968.39 Mb	maize	North America	United States	44.677	-90.177	—	SoilDepth12in_012	10.1128/mBio.00798-21
202	SRR12915134	PRJNA671703	SAMN16546566	SRX9379898	1,004.24 Mb	maize	North America	United States	44.677	-90.177	—	SoilDepth6in_013	10.1128/mBio.00798-21
203	SRR12915139	PRJNA671703	SAMN16546665	SRX9379893	989.32 Mb	maize	North America	United States	44.677	-90.177	—	SoilDepth12in_037	10.1128/mBio.00798-21
204	SRR12915140	PRJNA671703	SAMN16546593	SRX9379892	1,019.23 Mb	maize	North America	United States	44.677	-90.177	—	SoilDepth6in_040	10.1128/mBio.00798-21
205	SRR12915142	PRJNA671703	SAMN16546634	SRX9379890	545.19 Mb	maize	North America	United States	44.677	-90.177	—	SoilDepth12in_06	10.1128/mBio.00798-21
206	SRR12915143	PRJNA671703	SAMN16546633	SRX9379889	648.08 Mb	maize	North America	United States	44.677	-90.177	—	SoilDepth12in_05	10.1128/mBio.00798-21
207	SRR12915144	PRJNA671703	SAMN16546558	SRX9379888	571.75 Mb	maize	North America	United States	44.677	-90.177	—	SoilDepth6in_05	10.1128/mBio.00798-21
208	SRR12915149	PRJNA671703	SAMN16546637	SRX9379883	432.04 Mb	maize	North America	United States	44.677	-90.177	—	SoilDepth12in_09	10.1128/mBio.00798-21
209	SRR12915150	PRJNA671703	SAMN16546563	SRX9379882	268.48 Mb	maize	North America	United States	44.677	-90.177	—	SoilDepth6in_010	10.1128/mBio.00798-21
210	SRR12915156	PRJNA671703	SAMN16546650	SRX9379876	589.59 Mb	maize	North America	United States	44.677	-90.177	—	SoilDepth12in_022	10.1128/mBio.00798-21
211	SRR12915157	PRJNA671703	SAMN16546649	SRX9379875	125.63 Mb	maize	North America	United States	44.677	-90.177	—	SoilDepth12in_021	10.1128/mBio.00798-21
212	SRR12915158	PRJNA671703	SAMN16546576	SRX9379874	638.88 Mb	maize	North America	United States	44.677	-90.177	—	SoilDepth6in_023	10.1128/mBio.00798-21
213	SRR12915159	PRJNA671703	SAMN16546575	SRX9379873	189.74 Mb	maize	North America	United States	44.677	-90.177	—	SoilDepth6in_022	10.1128/mBio.00798-21
214	SRR12915160	PRJNA671703	SAMN16546589	SRX9379872	668.62 Mb	maize	North America	United States	44.677	-90.177	—	SoilDepth6in_036	10.1128/mBio.00798-21
215	SRR12915164	PRJNA671703	SAMN16546659	SRX9379868	382.55 Mb	maize	North America	United States	44.677	-90.177	—	SoilDepth12in_031	10.1128/mBio.00798-21
216	SRR12915165	PRJNA671703	SAMN16546586	SRX9379867	840.58 Mb	maize	North America	United States	44.677	-90.177	—	SoilDepth6in_033	10.1128/mBio.00798-21
217	SRR12915170	PRJNA671703	SAMN16546629	SRX9379862	1,019.02 Mb	maize	North America	United States	44.677	-90.177	—	SoilDepth12in_01	10.1128/mBio.00798-21
218	SRR12915172	PRJNA671703	SAMN16546554	SRX9379860	1.18 Gb	maize	North America	United States	44.677	-90.177	—	SoilDepth6in_01	10.1128/mBio.00798-21
219	SRR12915177	PRJNA671703	SAMN16546664	SRX9379855	1.68 Gb	maize	North America	United States	44.677	-90.177	—	SoilDepth12in_036	10.1128/mBio.00798-21
220	SRR12915178	PRJNA671703	SAMN16546592	SRX9379854	1.02 Gb	maize	North America	United States	44.677	-90.177	—	SoilDepth6in_039	10.1128/mBio.00798-21
221	SRR12915180	PRJNA671703	SAMN16546644	SRX9379852	497.19 Mb	maize	North America	United States	44.677	-90.177	—	SoilDepth12in_016	10.1128/mBio.00798-21
222	SRR12915181	PRJNA671703	SAMN16546570	SRX9379851	552.31 Mb	maize	North America	United States	44.677	-90.177	—	SoilDepth6in_017	10.1128/mBio.00798-21
223	SRR12915185	PRJNA671703	SAMN16546642	SRX9379847	475.21 Mb	maize	North America	United States	44.677	-90.177	—	SoilDepth12in_014	10.1128/mBio.00798-21
224	SRR12915186	PRJNA671703	SAMN16546661	SRX9379846	563.93 Mb	maize	North America	United States	44.677	-90.177	—	SoilDepth12in_033	10.1128/mBio.00798-21
225	SRR12915187	PRJNA671703	SAMN16546588	SRX9379845	809.80 Mb	maize	North America	United States	44.677	-90.177	—	SoilDepth6in_035	10.1128/mBio.00798-21
226	SRR12915192	PRJNA671703	SAMN16546658	SRX9379840	776.79 Mb	maize	North America	United States	44.677	-90.177	—	SoilDepth12in_030	10.1128/mBio.00798-21
227	SRR12915193	PRJNA671703	SAMN16546585	SRX9379839	503.35 Mb	maize	North America	United States	44.677	-90.177	—	SoilDepth6in_032	10.1128/mBio.00798-21
228	SRR12915196	PRJNA671703	SAMN16546568	SRX9379836	448.71 Mb	maize	North America	United States	44.677	-90.177	—	SoilDepth6in_015	10.1128/mBio.00798-21
229	SRR12915199	PRJNA671703	SAMN16546638	SRX9379833	733.32 Mb	maize	North America	United States	44.677	-90.177	—	SoilDepth12in_010	10.1128/mBio.00798-21
230	SRR12915200	PRJNA671703	SAMN16546564	SRX9379832	730.70 Mb	maize	North America	United States	44.677	-90.177	—	SoilDepth6in_011	10.1128/mBio.00798-21
231	SRR12915204	PRJNA671703	SAMN16546662	SRX9379828	287.55 Mb	maize	North America	United States	44.677	-90.177	—	SoilDepth12in_034	10.1128/mBio.00798-21
232	SRR12915205	PRJNA671703	SAMN16546590	SRX9379827	271.12 Mb	maize	North America	United States	44.677	-90.177	—	SoilDepth6in_037	10.1128/mBio.00798-21
233	SRR12915210	PRJNA671703	SAMN16546651	SRX9379822	408.85 Mb	maize	North America	United States	44.677	-90.177	—	SoilDepth12in_023	10.1128/mBio.00798-21
234	SRR12915211	PRJNA671703	SAMN16546578	SRX9379821	476.56 Mb	maize	North America	United States	44.677	-90.177	—	SoilDepth6in_025	10.1128/mBio.00798-21
235	SRR12915215	PRJNA671703	SAMN16546476	SRX9379817	719.89 Mb	maize	North America	United States	44.677	-90.177	—	ControlSoil_02	10.1128/mBio.00798-21
236	SRR12915216	PRJNA671703	SAMN16546475	SRX9379816	1.11 Gb	maize	North America	United States	44.677	-90.177	—	ControlSoil_01	10.1128/mBio.00798-21
237	SRR12915221	PRJNA671703	SAMN16546632	SRX9379811	912.93 Mb	maize	North America	United States	44.677	-90.177	—	SoilDepth12in_04	10.1128/mBio.00798-21
238	SRR12915222	PRJNA671703	SAMN16546557	SRX9379810	893.79 Mb	maize	North America	United States	44.677	-90.177	—	SoilDepth6in_04	10.1128/mBio.00798-21
239	SRR12915231	PRJNA671703	SAMN16546648	SRX9379801	780.28 Mb	maize	North America	United States	44.677	-90.177	—	SoilDepth12in_020	10.1128/mBio.00798-21
240	SRR12915232	PRJNA671703	SAMN16546574	SRX9379800	956.20 Mb	maize	North America	United States	44.677	-90.177	—	SoilDepth6in_021	10.1128/mBio.00798-21
241	SRR12915238	PRJNA671703	SAMN16546646	SRX9379794	801.05 Mb	maize	North America	United States	44.677	-90.177	—	SoilDepth12in_018	10.1128/mBio.00798-21
242	SRR12915239	PRJNA671703	SAMN16546572	SRX9379793	848.56 Mb	maize	North America	United States	44.677	-90.177	—	SoilDepth6in_019	10.1128/mBio.00798-21
243	SRR12915244	PRJNA671703	SAMN16546655	SRX9379788	793.56 Mb	maize	North America	United States	44.677	-90.177	—	SoilDepth12in_027	10.1128/mBio.00798-21
244	SRR12915245	PRJNA671703	SAMN16546582	SRX9379787	674.84 Mb	maize	North America	United States	44.677	-90.177	—	SoilDepth6in_029	10.1128/mBio.00798-21
245	SRR12915251	PRJNA671703	SAMN16546631	SRX9379781	345.51 Mb	maize	North America	United States	44.677	-90.177	—	SoilDepth12in_03	10.1128/mBio.00798-21
246	SRR12915252	PRJNA671703	SAMN16546653	SRX9379780	715.03 Mb	maize	North America	United States	44.677	-90.177	—	SoilDepth12in_025	10.1128/mBio.00798-21
247	SRR12915253	PRJNA671703	SAMN16546580	SRX9379779	815.81 Mb	maize	North America	United States	44.677	-90.177	—	SoilDepth6in_027	10.1128/mBio.00798-21
248	SRR12915258	PRJNA671703	SAMN16546562	SRX9379774	997.12 Mb	maize	North America	United States	44.677	-90.177	—	SoilDepth6in_09	10.1128/mBio.00798-21
249	SRR12915259	PRJNA671703	SAMN16546645	SRX9379773	1.01 Gb	maize	North America	United States	44.677	-90.177	—	SoilDepth12in_017	10.1128/mBio.00798-21
250	SRR12915260	PRJNA671703	SAMN16546571	SRX9379772	672.25 Mb	maize	North America	United States	44.677	-90.177	—	SoilDepth6in_018	10.1128/mBio.00798-21
251	SRR12915265	PRJNA671703	SAMN16546656	SRX9379767	1.29 Gb	maize	North America	United States	44.677	-90.177	—	SoilDepth12in_028	10.1128/mBio.00798-21
252	SRR12915266	PRJNA671703	SAMN16546583	SRX9379766	945.81 Mb	maize	North America	United States	44.677	-90.177	—	SoilDepth6in_030	10.1128/mBio.00798-21
253	SRR12915270	PRJNA671703	SAMN16546639	SRX9379762	970.84 Mb	maize	North America	United States	44.677	-90.177	—	SoilDepth12in_011	10.1128/mBio.00798-21
254	SRR12915271	PRJNA671703	SAMN16546565	SRX9379761	619.86 Mb	maize	North America	United States	44.677	-90.177	—	SoilDepth6in_012	10.1128/mBio.00798-21
255	SRR12915276	PRJNA671703	SAMN16546556	SRX9379756	573.41 Mb	maize	North America	United States	44.677	-90.177	—	SoilDepth6in_03	10.1128/mBio.00798-21
256	SRR12915281	PRJNA671703	SAMN16546636	SRX9379751	564.59 Mb	maize	North America	United States	44.677	-90.177	—	SoilDepth12in_08	10.1128/mBio.00798-21
257	SRR12915284	PRJNA671703	SAMN16546561	SRX9379748	647.67 Mb	maize	North America	United States	44.677	-90.177	—	SoilDepth6in_08	10.1128/mBio.00798-21
258	SRR12915287	PRJNA671703	SAMN16546641	SRX9379745	681.63 Mb	maize	North America	United States	44.677	-90.177	—	SoilDepth12in_013	10.1128/mBio.00798-21
259	SRR12915288	PRJNA671703	SAMN16546567	SRX9379744	755.10 Mb	maize	North America	United States	44.677	-90.177	—	SoilDepth6in_014	10.1128/mBio.00798-21
260	SRR12915293	PRJNA671703	SAMN16546666	SRX9379739	678.81 Mb	maize	North America	United States	44.677	-90.177	—	SoilDepth12in_038	10.1128/mBio.00798-21
261	SRR12915295	PRJNA671703	SAMN16546594	SRX9379737	262.86 Mb	maize	North America	United States	44.677	-90.177	—	SoilDepth6in_041	10.1128/mBio.00798-21
262	SRR12915301	PRJNA671703	SAMN16546663	SRX9379731	546.38 Mb	maize	North America	United States	44.677	-90.177	—	SoilDepth12in_035	10.1128/mBio.00798-21
263	SRR12915302	PRJNA671703	SAMN16546591	SRX9379730	477.61 Mb	maize	North America	United States	44.677	-90.177	—	SoilDepth6in_038	10.1128/mBio.00798-21
264	SRR12915308	PRJNA671703	SAMN16546652	SRX9379724	675.74 Mb	maize	North America	United States	44.677	-90.177	—	SoilDepth12in_024	10.1128/mBio.00798-21
265	SRR12915309	PRJNA671703	SAMN16546579	SRX9379723	602.48 Mb	maize	North America	United States	44.677	-90.177	—	SoilDepth6in_026	10.1128/mBio.00798-21
266	SRR12915313	PRJNA671703	SAMN16546643	SRX9379719	504.88 Mb	maize	North America	United States	44.677	-90.177	—	SoilDepth12in_015	10.1128/mBio.00798-21
267	SRR12915315	PRJNA671703	SAMN16546569	SRX9379717	877.68 Mb	maize	North America	United States	44.677	-90.177	—	SoilDepth6in_016	10.1128/mBio.00798-21
268	SRR12915320	PRJNA671703	SAMN16546654	SRX9379712	690.95 Mb	maize	North America	United States	44.677	-90.177	—	SoilDepth12in_026	10.1128/mBio.00798-21
269	SRR12915321	PRJNA671703	SAMN16546581	SRX9379711	832.45 Mb	maize	North America	United States	44.677	-90.177	—	SoilDepth6in_028	10.1128/mBio.00798-21
270	SRR12915327	PRJNA671703	SAMN16546647	SRX9379705	398.98 Mb	maize	North America	United States	44.677	-90.177	—	SoilDepth12in_019	10.1128/mBio.00798-21
271	SRR12915328	PRJNA671703	SAMN16546573	SRX9379704	431.12 Mb	maize	North America	United States	44.677	-90.177	—	SoilDepth6in_020	10.1128/mBio.00798-21
272	SRR12915332	PRJNA671703	SAMN16546660	SRX9379700	801.61 Mb	maize	North America	United States	44.677	-90.177	—	SoilDepth12in_032	10.1128/mBio.00798-21
273	SRR12915333	PRJNA671703	SAMN16546587	SRX9379699	591.75 Mb	maize	North America	United States	44.677	-90.177	—	SoilDepth6in_034	10.1128/mBio.00798-21
274	SRR12915334	PRJNA671703	SAMN16546559	SRX9379698	734.83 Mb	maize	North America	United States	44.677	-90.177	—	SoilDepth6in_06	10.1128/mBio.00798-21
275	SRR12915339	PRJNA671703	SAMN16546657	SRX9379693	833.32 Mb	maize	North America	United States	44.677	-90.177	—	SoilDepth12in_029	10.1128/mBio.00798-21
276	SRR12915340	PRJNA671703	SAMN16546584	SRX9379692	810.94 Mb	maize	North America	United States	44.677	-90.177	—	SoilDepth6in_031	10.1128/mBio.00798-21
277	SRR12915347	PRJNA671703	SAMN16546577	SRX9379685	828.35 Mb	maize	North America	United States	44.677	-90.177	—	SoilDepth6in_024	10.1128/mBio.00798-21
278	SRR12619551	PRJNA662623	SAMN16091608	SRX9102460	5.83 Gb	maize	North America	United States	42.0308	-93.6319	—	SCII10_A233_50	10.3390/microorganisms11010017
279	SRR12619552	PRJNA662623	SAMN16091607	SRX9102459	4.31 Gb	maize	North America	United States	42.0308	-93.6319	—	SCII9_A232_49	10.3390/microorganisms11010017
280	SRR12619553	PRJNA662623	SAMN16091606	SRX9102458	8.02 Gb	maize	North America	United States	42.0308	-93.6319	—	SCII8_A231_48	10.3390/microorganisms11010017
281	SRR12619554	PRJNA662623	SAMN16091605	SRX9102457	6.12 Gb	maize	North America	United States	42.0308	-93.6319	—	SCII7_A230_47	10.3390/microorganisms11010017
282	SRR12619559	PRJNA662623	SAMN16091610	SRX9102452	5.49 Gb	maize	North America	United States	42.0308	-93.6319	—	SCII12_A235_52	10.3390/microorganisms11010017
283	SRR12619560	PRJNA662623	SAMN16091609	SRX9102451	7.21 Gb	maize	North America	United States	42.0308	-93.6319	—	SCII11_A234_51	10.3390/microorganisms11010017
284	SRR14695917	PRJNA734100	SAMN19471513	SRX11034011	1.92 Gb	fruit	Asia	China	30.47	114.34	—	FFS_44d	10.1016/j.scitotenv.2022.156243
285	SRR14695918	PRJNA734100	SAMN19471512	SRX11034010	1.95 Gb	fruit	Asia	China	30.47	114.34	—	FFS_32d	10.1016/j.scitotenv.2022.156243
286	SRR14695919	PRJNA734100	SAMN19471511	SRX11034009	1.84 Gb	fruit	Asia	China	30.47	114.34	—	FFS_16d	10.1016/j.scitotenv.2022.156243
287	SRR14695921	PRJNA734100	SAMN19471510	SRX11034007	2.22 Gb	fruit	Asia	China	30.47	114.34	—	FFS_6d	10.1016/j.scitotenv.2022.156243
288	SRR14695922	PRJNA734100	SAMN19471509	SRX11034006	2.18 Gb	fruit	Asia	China	30.47	114.34	—	FFS_0d	10.1016/j.scitotenv.2022.156243
289	SRR25158175	PRJNA983538	SAMN35729566	SRX20906449	6.15 Gb	rice	Asia	China	25.07	110.306	—	China_S112	10.1038/s41467-023-43000-z
290	SRR25158176	PRJNA983538	SAMN35729646	SRX20906448	6.46 Gb	maize	Asia	China	32.3458	110.024	—	China_S25	10.1038/s41467-023-43000-z
291	SRR25158178	PRJNA983538	SAMN35729644	SRX20906446	7.19 Gb	rice	Asia	China	28.7569	115.928	—	China_S248	10.1038/s41467-023-43000-z
292	SRR25158180	PRJNA983538	SAMN35729642	SRX20906444	7.55 Gb	rice	Asia	China	28.775	116.056	—	China_S245	10.1038/s41467-023-43000-z
293	SRR25158181	PRJNA983538	SAMN35729641	SRX20906443	7.51 Gb	rice	Asia	China	28.7681	116.054	—	China_S244	10.1038/s41467-023-43000-z
294	SRR25158184	PRJNA983538	SAMN35729638	SRX20906440	6.72 Gb	rice	Asia	China	29.7117	115.853	—	China_S239	10.1038/s41467-023-43000-z
295	SRR25158185	PRJNA983538	SAMN35729637	SRX20906439	6.22 Gb	rice	Asia	China	27.1172	115.051	—	China_S238	10.1038/s41467-023-43000-z
296	SRR25158186	PRJNA983538	SAMN35729565	SRX20906438	6.61 Gb	maize	Asia	China	34.5547	113.483	—	China_S11	10.1038/s41467-023-43000-z
297	SRR25158187	PRJNA983538	SAMN35729636	SRX20906437	7.12 Gb	rice	Asia	China	27.0808	115.01	—	China_S237	10.1038/s41467-023-43000-z
298	SRR25158189	PRJNA983538	SAMN35729634	SRX20906435	7.38 Gb	rice	Asia	China	27.1653	115.098	—	China_S233	10.1038/s41467-023-43000-z
299	SRR25158191	PRJNA983538	SAMN35729632	SRX20906433	6.52 Gb	vegetable	Asia	China	31.5303	120.332	—	China_S228	10.1038/s41467-023-43000-z
300	SRR25158192	PRJNA983538	SAMN35729631	SRX20906432	6.65 Gb	vegetable	Asia	China	31.4597	120.248	—	China_S227	10.1038/s41467-023-43000-z
301	SRR25158193	PRJNA983538	SAMN35729630	SRX20906431	6.09 Gb	rice	Asia	China	32.9678	120.011	—	China_S226	10.1038/s41467-023-43000-z
302	SRR25158196	PRJNA983538	SAMN35729627	SRX20906428	8.25 Gb	vegetable	Asia	China	32.3242	113.625	—	China_S22	10.1038/s41467-023-43000-z
303	SRR25158197	PRJNA983538	SAMN35729564	SRX20906427	6.33 Gb	rice	Asia	China	25.2166	110.252	—	China_S109	10.1038/s41467-023-43000-z
304	SRR25158199	PRJNA983538	SAMN35729625	SRX20906425	6.60 Gb	others	Asia	China	42.9444	128.446	—	China_S213	10.1038/s41467-023-43000-z
305	SRR25158201	PRJNA983538	SAMN35729623	SRX20906423	6.70 Gb	rice	Asia	China	45.0125	124.983	—	China_S211	10.1038/s41467-023-43000-z
306	SRR25158202	PRJNA983538	SAMN35729622	SRX20906785	7.09 Gb	vegetable	Asia	China	32.3242	113.625	—	China_S21	10.1038/s41467-023-43000-z
307	SRR25158205	PRJNA983538	SAMN35729619	SRX20906782	6.54 Gb	fruit	Asia	China	34.7822	111.765	—	China_S2	10.1038/s41467-023-43000-z
308	SRR25158207	PRJNA983538	SAMN35729553	SRX20906780	7.95 Gb	vegetable	Asia	China	29.16	119.82	—	R42	10.1038/s41467-023-43000-z
309	SRR25158208	PRJNA983538	SAMN35729552	SRX20906779	8.10 Gb	vegetable	Asia	China	29.16	119.81	—	R41	10.1038/s41467-023-43000-z
310	SRR25158209	PRJNA983538	SAMN35729551	SRX20906778	8.89 Gb	vegetable	Asia	China	29.16	119.8	—	R40	10.1038/s41467-023-43000-z
311	SRR25158210	PRJNA983538	SAMN35729550	SRX20906777	10.84 Gb	vegetable	Asia	China	29.16	119.79	—	R4	10.1038/s41467-023-43000-z
312	SRR25158211	PRJNA983538	SAMN35729549	SRX20906776	7.94 Gb	vegetable	Asia	China	29.16	119.78	—	R39	10.1038/s41467-023-43000-z
313	SRR25158212	PRJNA983538	SAMN35729548	SRX20906775	12.36 Gb	vegetable	Asia	China	29.16	119.77	—	R3	10.1038/s41467-023-43000-z
314	SRR25158213	PRJNA983538	SAMN35729547	SRX20906774	8.80 Gb	vegetable	Asia	China	29.16	119.76	—	R27	10.1038/s41467-023-43000-z
315	SRR25158214	PRJNA983538	SAMN35729546	SRX20906773	7.79 Gb	vegetable	Asia	China	29.16	119.75	—	R26	10.1038/s41467-023-43000-z
316	SRR25158215	PRJNA983538	SAMN35729545	SRX20906772	8.24 Gb	vegetable	Asia	China	29.16	119.74	—	R25	10.1038/s41467-023-43000-z
317	SRR25158216	PRJNA983538	SAMN35729544	SRX20906771	8.00 Gb	vegetable	Asia	China	29.16	119.73	—	R24	10.1038/s41467-023-43000-z
318	SRR25158217	PRJNA983538	SAMN35729589	SRX20906770	6.85 Gb	others	Asia	China	25.8619	107.13	—	China_S141	10.1038/s41467-023-43000-z
319	SRR25158218	PRJNA983538	SAMN35729543	SRX20906769	8.85 Gb	vegetable	Asia	China	29.16	119.72	—	R23	10.1038/s41467-023-43000-z
320	SRR25158219	PRJNA983538	SAMN35729542	SRX20906768	8.64 Gb	vegetable	Asia	China	29.16	119.71	—	R21	10.1038/s41467-023-43000-z
321	SRR25158220	PRJNA983538	SAMN35729541	SRX20906767	8.77 Gb	vegetable	Asia	China	29.16	119.7	—	R20	10.1038/s41467-023-43000-z
322	SRR25158221	PRJNA983538	SAMN35729540	SRX20906766	11.06 Gb	vegetable	Asia	China	29.16	119.69	—	R2	10.1038/s41467-023-43000-z
323	SRR25158222	PRJNA983538	SAMN35729539	SRX20906765	9.66 Gb	vegetable	Asia	China	29.16	119.68	—	R19	10.1038/s41467-023-43000-z
324	SRR25158223	PRJNA983538	SAMN35729538	SRX20906764	8.34 Gb	vegetable	Asia	China	29.16	119.67	—	R18	10.1038/s41467-023-43000-z
325	SRR25158224	PRJNA983538	SAMN35729537	SRX20906763	9.02 Gb	vegetable	Asia	China	29.16	119.66	—	R17	10.1038/s41467-023-43000-z
326	SRR25158225	PRJNA983538	SAMN35729536	SRX20906762	7.63 Gb	vegetable	Asia	China	29.16	119.65	—	R140	10.1038/s41467-023-43000-z
327	SRR25158226	PRJNA983538	SAMN35729535	SRX20906761	7.82 Gb	vegetable	Asia	China	29.16	119.64	—	R139	10.1038/s41467-023-43000-z
328	SRR25158227	PRJNA983538	SAMN35729534	SRX20906760	7.35 Gb	vegetable	Asia	China	29.16	119.63	—	R138	10.1038/s41467-023-43000-z
329	SRR25158228	PRJNA983538	SAMN35729588	SRX20906759	7.65 Gb	others	Asia	China	25.805	107.175	—	China_S140	10.1038/s41467-023-43000-z
330	SRR25158229	PRJNA983538	SAMN35729533	SRX20906758	6.51 Gb	vegetable	Asia	China	29.16	119.62	—	R137	10.1038/s41467-023-43000-z
331	SRR25158230	PRJNA983538	SAMN35729532	SRX20906757	8.10 Gb	vegetable	Asia	China	29.16	119.61	—	R136	10.1038/s41467-023-43000-z
332	SRR25158231	PRJNA983538	SAMN35729531	SRX20906756	6.30 Gb	vegetable	Asia	China	29.16	119.6	—	R135	10.1038/s41467-023-43000-z
333	SRR25158232	PRJNA983538	SAMN35729530	SRX20906755	6.94 Gb	vegetable	Asia	China	29.16	119.59	—	R134	10.1038/s41467-023-43000-z
334	SRR25158233	PRJNA983538	SAMN35729529	SRX20906754	8.06 Gb	vegetable	Asia	China	29.16	119.58	—	R133	10.1038/s41467-023-43000-z
335	SRR25158234	PRJNA983538	SAMN35729528	SRX20906753	7.94 Gb	vegetable	Asia	China	29.16	119.57	—	R132	10.1038/s41467-023-43000-z
336	SRR25158235	PRJNA983538	SAMN35729527	SRX20906752	8.72 Gb	vegetable	Asia	China	29.16	119.56	—	R131	10.1038/s41467-023-43000-z
337	SRR25158236	PRJNA983538	SAMN35729526	SRX20906751	8.95 Gb	vegetable	Asia	China	29.16	119.55	—	R130	10.1038/s41467-023-43000-z
338	SRR25158237	PRJNA983538	SAMN35729525	SRX20906750	7.35 Gb	vegetable	Asia	China	29.16	119.54	—	R129	10.1038/s41467-023-43000-z
339	SRR25158238	PRJNA983538	SAMN35729524	SRX20906749	7.66 Gb	vegetable	Asia	China	29.16	119.53	—	R128	10.1038/s41467-023-43000-z
340	SRR25158251	PRJNA983538	SAMN35729438	SRX20906736	7.46 Gb	wheat	Europe	United Kingdom	55.94	-3.24	—	ED3_EDME210000090	10.1038/s41467-023-43000-z
341	SRR25158252	PRJNA983538	SAMN35729583	SRX20906735	6.95 Gb	others	Asia	China	27.0436	106.961	—	China_S135	10.1038/s41467-023-43000-z
342	SRR25158253	PRJNA983538	SAMN35729437	SRX20906734	11.11 Gb	wheat	Europe	United Kingdom	55.94	-3.23	—	ED2_EDME210000089	10.1038/s41467-023-43000-z
343	SRR25158254	PRJNA983538	SAMN35729436	SRX20906733	8.41 Gb	wheat	Europe	United Kingdom	55.94	-3.22	—	ED1_EDME210000088	10.1038/s41467-023-43000-z
344	SRR25158255	PRJNA983538	SAMN35729435	SRX20906732	9.60 Gb	wheat	Europe	United Kingdom	53.47	-2.28	—	D6_EDME210000102	10.1038/s41467-023-43000-z
345	SRR25158256	PRJNA983538	SAMN35729434	SRX20906731	8.60 Gb	wheat	Europe	United Kingdom	53.47	-2.27	—	D5_EDME210000101	10.1038/s41467-023-43000-z
346	SRR25158257	PRJNA983538	SAMN35729433	SRX20906730	8.87 Gb	wheat	Europe	United Kingdom	53.47	-2.26	—	D4_EDME210000100	10.1038/s41467-023-43000-z
347	SRR25158258	PRJNA983538	SAMN35729432	SRX20906729	9.33 Gb	wheat	Europe	United Kingdom	53.47	-2.25	—	D3_EDME210000099	10.1038/s41467-023-43000-z
348	SRR25158259	PRJNA983538	SAMN35729431	SRX20906728	8.76 Gb	wheat	Europe	United Kingdom	53.47	-2.24	—	D2_EDME210000098	10.1038/s41467-023-43000-z
349	SRR25158260	PRJNA983538	SAMN35729430	SRX20906727	8.62 Gb	wheat	Europe	United Kingdom	53.47	-2.23	—	D1_EDME210000097	10.1038/s41467-023-43000-z
350	SRR25158263	PRJNA983538	SAMN35729582	SRX20906724	6.17 Gb	others	Asia	China	27.0428	107.023	—	China_S134	10.1038/s41467-023-43000-z
351	SRR25158272	PRJNA983538	SAMN35729587	SRX20906715	6.80 Gb	maize	Asia	China	34.1328	112.089	—	China_S14	10.1038/s41467-023-43000-z
352	SRR25158273	PRJNA983538	SAMN35729560	SRX20906714	8.70 Gb	fruit	Asia	China	34.7678	111.769	—	China_S1	10.1038/s41467-023-43000-z
353	SRR25158274	PRJNA983538	SAMN35729523	SRX20906713	7.14 Gb	vegetable	Asia	China	29.16	119.52	—	R127	10.1038/s41467-023-43000-z
354	SRR25158275	PRJNA983538	SAMN35729522	SRX20906712	6.63 Gb	vegetable	Asia	China	29.16	119.51	—	R126	10.1038/s41467-023-43000-z
355	SRR25158276	PRJNA983538	SAMN35729521	SRX20906711	8.32 Gb	vegetable	Asia	China	29.16	119.5	—	R125	10.1038/s41467-023-43000-z
356	SRR25158277	PRJNA983538	SAMN35729520	SRX20906710	7.23 Gb	vegetable	Asia	China	29.16	119.49	—	R124	10.1038/s41467-023-43000-z
357	SRR25158278	PRJNA983538	SAMN35729519	SRX20906709	7.15 Gb	vegetable	Asia	China	29.16	119.48	—	R123	10.1038/s41467-023-43000-z
358	SRR25158279	PRJNA983538	SAMN35729518	SRX20906708	9.42 Gb	vegetable	Asia	China	29.16	119.47	—	R122	10.1038/s41467-023-43000-z
359	SRR25158280	PRJNA983538	SAMN35729517	SRX20906707	7.11 Gb	vegetable	Asia	China	29.16	119.46	—	R121	10.1038/s41467-023-43000-z
360	SRR25158281	PRJNA983538	SAMN35729516	SRX20906706	12.36 Gb	vegetable	Asia	China	29.16	119.45	—	R105	10.1038/s41467-023-43000-z
361	SRR25158282	PRJNA983538	SAMN35729515	SRX20906705	10.51 Gb	vegetable	Asia	China	29.16	119.44	—	R104	10.1038/s41467-023-43000-z
362	SRR25158283	PRJNA983538	SAMN35729514	SRX20906704	10.44 Gb	vegetable	Asia	China	29.16	119.43	—	R103	10.1038/s41467-023-43000-z
363	SRR25158284	PRJNA983538	SAMN35729586	SRX20906703	7.33 Gb	others	Asia	China	25.8128	107.177	—	China_S139	10.1038/s41467-023-43000-z
364	SRR25158285	PRJNA983538	SAMN35729513	SRX20906702	10.49 Gb	vegetable	Asia	China	29.16	119.42	—	R102	10.1038/s41467-023-43000-z
365	SRR25158286	PRJNA983538	SAMN35729512	SRX20906701	10.28 Gb	vegetable	Asia	China	29.16	119.41	—	R101	10.1038/s41467-023-43000-z
366	SRR25158287	PRJNA983538	SAMN35729511	SRX20906700	10.69 Gb	vegetable	Asia	China	29.16	119.4	—	R100	10.1038/s41467-023-43000-z
367	SRR25158288	PRJNA983538	SAMN35729510	SRX20906699	10.42 Gb	vegetable	Asia	China	29.16	119.39	—	R1	10.1038/s41467-023-43000-z
368	SRR25158295	PRJNA983538	SAMN35729585	SRX20906692	6.72 Gb	others	Asia	China	27.0425	107.023	—	China_S137	10.1038/s41467-023-43000-z
369	SRR25158306	PRJNA983538	SAMN35729581	SRX20906681	6.80 Gb	others	Asia	China	26.3064	106.139	—	China_S132	10.1038/s41467-023-43000-z
370	SRR25158314	PRJNA983538	SAMN35729429	SRX20906673	7.54 Gb	fruit	Asia	China	30.18	121.55	—	chrono_s8	10.1038/s41467-023-43000-z
371	SRR25158315	PRJNA983538	SAMN35729428	SRX20906672	8.71 Gb	fruit	Asia	China	30.18	121.54	—	chrono_s7	10.1038/s41467-023-43000-z
372	SRR25158316	PRJNA983538	SAMN35729427	SRX20906671	8.18 Gb	fruit	Asia	China	30.18	121.53	—	chrono_s6	10.1038/s41467-023-43000-z
373	SRR25158318	PRJNA983538	SAMN35729426	SRX20906669	11.85 Gb	fruit	Asia	China	30.18	121.52	—	chrono_s33	10.1038/s41467-023-43000-z
374	SRR25158319	PRJNA983538	SAMN35729425	SRX20906668	9.69 Gb	fruit	Asia	China	30.18	121.51	—	chrono_s32	10.1038/s41467-023-43000-z
375	SRR25158320	PRJNA983538	SAMN35729424	SRX20906667	7.71 Gb	fruit	Asia	China	30.18	121.5	—	chrono_s31	10.1038/s41467-023-43000-z
376	SRR25158321	PRJNA983538	SAMN35729423	SRX20906666	8.24 Gb	vegetable	Asia	China	30.18	121.49	—	chrono_s3	10.1038/s41467-023-43000-z
377	SRR25158322	PRJNA983538	SAMN35729422	SRX20906665	8.07 Gb	vegetable	Asia	China	30.18	121.48	—	chrono_s28	10.1038/s41467-023-43000-z
378	SRR25158323	PRJNA983538	SAMN35729421	SRX20906664	8.19 Gb	vegetable	Asia	China	30.18	121.47	—	chrono_s27	10.1038/s41467-023-43000-z
379	SRR25158324	PRJNA983538	SAMN35729420	SRX20906663	8.11 Gb	vegetable	Asia	China	30.18	121.46	—	chrono_s26	10.1038/s41467-023-43000-z
380	SRR25158325	PRJNA983538	SAMN35729419	SRX20906662	11.08 Gb	vegetable	Asia	China	30.18	121.45	—	chrono_s23	10.1038/s41467-023-43000-z
381	SRR25158326	PRJNA983538	SAMN35729418	SRX20906661	7.46 Gb	vegetable	Asia	China	30.18	121.44	—	chrono_s22	10.1038/s41467-023-43000-z
382	SRR25158327	PRJNA983538	SAMN35729417	SRX20906660	9.87 Gb	vegetable	Asia	China	30.18	121.43	—	chrono_s21	10.1038/s41467-023-43000-z
383	SRR25158329	PRJNA983538	SAMN35729416	SRX20906658	7.00 Gb	vegetable	Asia	China	30.18	121.42	—	chrono_s2	10.1038/s41467-023-43000-z
384	SRR25158330	PRJNA983538	SAMN35729415	SRX20906657	8.30 Gb	vegetable	Asia	China	30.18	121.41	—	chrono_s18	10.1038/s41467-023-43000-z
385	SRR25158331	PRJNA983538	SAMN35729414	SRX20906656	9.65 Gb	vegetable	Asia	China	30.18	121.4	—	chrono_s17	10.1038/s41467-023-43000-z
386	SRR25158332	PRJNA983538	SAMN35729413	SRX20906655	7.89 Gb	vegetable	Asia	China	30.18	121.39	—	chrono_s16	10.1038/s41467-023-43000-z
387	SRR25158333	PRJNA983538	SAMN35729412	SRX20906654	9.29 Gb	vegetable	Asia	China	30.18	121.38	—	chrono_s13	10.1038/s41467-023-43000-z
388	SRR25158334	PRJNA983538	SAMN35729411	SRX20906653	7.24 Gb	vegetable	Asia	China	30.18	121.37	—	chrono_s12	10.1038/s41467-023-43000-z
389	SRR25158335	PRJNA983538	SAMN35729410	SRX20906652	7.57 Gb	vegetable	Asia	China	30.18	121.36	—	chrono_s11	10.1038/s41467-023-43000-z
390	SRR25158345	PRJNA983538	SAMN35729592	SRX20906642	7.56 Gb	vegetable	Asia	China	20.0344	110.338	—	China_S145	10.1038/s41467-023-43000-z
391	SRR25158356	PRJNA983538	SAMN35729591	SRX20906631	7.80 Gb	rice	Asia	China	25.8494	107.167	—	China_S143	10.1038/s41467-023-43000-z
392	SRR25158361	PRJNA983538	SAMN35729559	SRX20906626	9.40 Gb	vegetable	Asia	China	29.16	119.88	—	R99	10.1038/s41467-023-43000-z
393	SRR25158362	PRJNA983538	SAMN35729558	SRX20906625	9.66 Gb	vegetable	Asia	China	29.16	119.87	—	R98	10.1038/s41467-023-43000-z
394	SRR25158363	PRJNA983538	SAMN35729557	SRX20906624	12.21 Gb	vegetable	Asia	China	29.16	119.86	—	R97	10.1038/s41467-023-43000-z
395	SRR25158364	PRJNA983538	SAMN35729556	SRX20906623	10.90 Gb	vegetable	Asia	China	29.16	119.85	—	R96	10.1038/s41467-023-43000-z
396	SRR25158365	PRJNA983538	SAMN35729555	SRX20906622	10.80 Gb	vegetable	Asia	China	29.16	119.84	—	R5	10.1038/s41467-023-43000-z
397	SRR25158366	PRJNA983538	SAMN35729554	SRX20906621	7.24 Gb	vegetable	Asia	China	29.16	119.83	—	R43	10.1038/s41467-023-43000-z
398	SRR25158368	PRJNA983538	SAMN35729712	SRX20906619	9.53 Gb	rice	Asia	China	30.6631	120.457	—	China_S366	10.1038/s41467-023-43000-z
399	SRR25158369	PRJNA983538	SAMN35729711	SRX20906618	7.57 Gb	rice	Asia	China	30.6686	120.518	—	China_S363	10.1038/s41467-023-43000-z
400	SRR25158371	PRJNA983538	SAMN35729709	SRX20906616	7.88 Gb	rice	Asia	China	29.4617	107.11	—	China_S354	10.1038/s41467-023-43000-z
401	SRR25158372	PRJNA983538	SAMN35729708	SRX20906615	6.18 Gb	rice	Asia	China	29.4706	107.144	—	China_S351	10.1038/s41467-023-43000-z
402	SRR25158373	PRJNA983538	SAMN35729707	SRX20906614	6.84 Gb	fruit	Asia	China	25.8986	113.006	—	China_S35	10.1038/s41467-023-43000-z
403	SRR25158374	PRJNA983538	SAMN35729572	SRX20906613	6.66 Gb	rice	Asia	China	24.2836	109.408	—	China_S121	10.1038/s41467-023-43000-z
404	SRR25158376	PRJNA983538	SAMN35729705	SRX20906611	7.89 Gb	vegetable	Asia	China	29.5125	106.472	—	China_S342	10.1038/s41467-023-43000-z
405	SRR25158378	PRJNA983538	SAMN35729703	SRX20906609	5.95 Gb	others	Asia	China	29.6978	107.381	—	China_S339	10.1038/s41467-023-43000-z
406	SRR25158381	PRJNA983538	SAMN35729700	SRX20906606	7.50 Gb	vegetable	Asia	China	26.7731	100.672	—	China_S333	10.1038/s41467-023-43000-z
407	SRR25158382	PRJNA983538	SAMN35729699	SRX20906605	7.24 Gb	vegetable	Asia	China	26.7586	100.668	—	China_S332	10.1038/s41467-023-43000-z
408	SRR25158383	PRJNA983538	SAMN35729698	SRX20906604	7.43 Gb	rice	Asia	China	25.6033	100.248	—	China_S331	10.1038/s41467-023-43000-z
409	SRR25158384	PRJNA983538	SAMN35729697	SRX20906603	7.53 Gb	maize	Asia	China	25.6867	100.388	—	China_S330	10.1038/s41467-023-43000-z
410	SRR25158387	PRJNA983538	SAMN35729695	SRX20906600	7.47 Gb	others	Asia	China	25.5867	100.32	—	China_S328	10.1038/s41467-023-43000-z
411	SRR25158388	PRJNA983538	SAMN35729694	SRX20906599	7.66 Gb	maize	Asia	China	39.6111	117.025	—	China_S326	10.1038/s41467-023-43000-z
412	SRR25158389	PRJNA983538	SAMN35729693	SRX20906598	7.66 Gb	maize	Asia	China	39.5469	117.032	—	China_S325	10.1038/s41467-023-43000-z
413	SRR25158391	PRJNA983538	SAMN35729691	SRX20906596	7.53 Gb	maize	Asia	China	39.0442	117.656	—	China_S321	10.1038/s41467-023-43000-z
414	SRR25158392	PRJNA983538	SAMN35729690	SRX20906595	6.48 Gb	others	Asia	China	29.4358	113.017	—	China_S32	10.1038/s41467-023-43000-z
415	SRR25158393	PRJNA983538	SAMN35729689	SRX20906594	7.35 Gb	vegetable	Asia	China	39.2192	117.123	—	China_S318	10.1038/s41467-023-43000-z
416	SRR25158395	PRJNA983538	SAMN35729687	SRX20906592	6.16 Gb	vegetable	Asia	China	38.9211	117.534	—	China_S315	10.1038/s41467-023-43000-z
417	SRR25158396	PRJNA983538	SAMN35729570	SRX20906591	6.44 Gb	maize	Asia	China	34.4619	113.439	—	China_S12	10.1038/s41467-023-43000-z
418	SRR25158398	PRJNA983538	SAMN35729685	SRX20906589	7.57 Gb	rice	Asia	China	38.9847	117.15	—	China_S312	10.1038/s41467-023-43000-z
419	SRR25158402	PRJNA983538	SAMN35729654	SRX20906585	6.28 Gb	others	Asia	China	41.7711	123.438	—	China_S260	10.1038/s41467-023-43000-z
420	SRR25158403	PRJNA983538	SAMN35729653	SRX20906584	7.76 Gb	vegetable	Asia	China	41.0158	122.407	—	China_S258	10.1038/s41467-023-43000-z
421	SRR25158405	PRJNA983538	SAMN35729651	SRX20906582	7.89 Gb	vegetable	Asia	China	41.0158	122.405	—	China_S256	10.1038/s41467-023-43000-z
422	SRR25158411	PRJNA983538	SAMN35729563	SRX20906576	7.00 Gb	vegetable	Asia	China	22.3675	113.581	—	China_S108	10.1038/s41467-023-43000-z
423	SRR25158412	PRJNA983538	SAMN35729616	SRX20906575	6.97 Gb	others	Asia	China	30.1089	114.92	—	China_S191	10.1038/s41467-023-43000-z
424	SRR25158414	PRJNA983538	SAMN35729614	SRX20906573	6.63 Gb	others	Asia	China	46.6106	126.882	—	China_S187	10.1038/s41467-023-43000-z
425	SRR25158415	PRJNA983538	SAMN35729613	SRX20906572	7.24 Gb	maize	Asia	China	47.3239	124.088	—	China_S186	10.1038/s41467-023-43000-z
426	SRR25158418	PRJNA983538	SAMN35729610	SRX20906569	6.31 Gb	maize	Asia	China	45.7467	126.593	—	China_S182	10.1038/s41467-023-43000-z
427	SRR25158419	PRJNA983538	SAMN35729609	SRX20906568	7.49 Gb	others	Asia	China	44.5494	129.741	—	China_S180	10.1038/s41467-023-43000-z
428	SRR25158420	PRJNA983538	SAMN35729608	SRX20906567	6.97 Gb	wheat	Asia	China	34.3283	112.3	—	China_S18	10.1038/s41467-023-43000-z
429	SRR25158421	PRJNA983538	SAMN35729607	SRX20906566	7.39 Gb	others	Asia	China	44.575	129.7	—	China_S179	10.1038/s41467-023-43000-z
430	SRR25158423	PRJNA983538	SAMN35729606	SRX20906564	6.40 Gb	wheat	Asia	China	35.37	114.922	—	China_S178	10.1038/s41467-023-43000-z
431	SRR25158424	PRJNA983538	SAMN35729605	SRX20906563	6.07 Gb	wheat	Asia	China	35.3353	114.903	—	China_S177	10.1038/s41467-023-43000-z
432	SRR25158425	PRJNA983538	SAMN35729604	SRX20906562	6.34 Gb	maize	Asia	China	35.2047	114.749	—	China_S176	10.1038/s41467-023-43000-z
433	SRR25158430	PRJNA983538	SAMN35729599	SRX20906557	8.29 Gb	maize	Asia	China	34.2747	112.24	—	China_S17	10.1038/s41467-023-43000-z
434	SRR25158431	PRJNA983538	SAMN35729598	SRX20906556	6.77 Gb	vegetable	Asia	China	32.1633	114.113	—	China_S168	10.1038/s41467-023-43000-z
435	SRR25158432	PRJNA983538	SAMN35729597	SRX20906555	6.63 Gb	fruit	Asia	China	37.8744	114.892	—	China_S165	10.1038/s41467-023-43000-z
436	SRR25158435	PRJNA983538	SAMN35729595	SRX20906552	6.08 Gb	maize	Asia	China	37.9525	114.79	—	China_S162	10.1038/s41467-023-43000-z
437	SRR25158442	PRJNA983538	SAMN35729409	SRX20906545	7.50 Gb	vegetable	Asia	China	30.18	121.35	—	chrono_s1	10.1038/s41467-023-43000-z
438	SRR25158443	PRJNA983538	SAMN35729768	SRX20906544	7.77 Gb	vegetable	Asia	China	27.7608	118.031	—	China_S92	10.1038/s41467-023-43000-z
439	SRR25158444	PRJNA983538	SAMN35729767	SRX20906543	8.00 Gb	vegetable	Asia	China	27.7397	118.067	—	China_S91	10.1038/s41467-023-43000-z
440	SRR25158445	PRJNA983538	SAMN35729578	SRX20906542	6.65 Gb	others	Asia	China	26.3219	106.139	—	China_S129	10.1038/s41467-023-43000-z
441	SRR25158446	PRJNA983538	SAMN35729766	SRX20906541	7.26 Gb	vegetable	Asia	China	34.6886	113.553	—	China_S9	10.1038/s41467-023-43000-z
442	SRR25158448	PRJNA983538	SAMN35729764	SRX20906539	6.19 Gb	vegetable	Asia	China	39.6314	116.585	—	China_S77	10.1038/s41467-023-43000-z
443	SRR25158450	PRJNA983538	SAMN35729762	SRX20906537	6.26 Gb	others	Asia	China	31.2369	118.31	—	China_S75	10.1038/s41467-023-43000-z
444	SRR25158451	PRJNA983538	SAMN35729761	SRX20906536	6.50 Gb	others	Asia	China	31.2369	118.22	—	China_S72	10.1038/s41467-023-43000-z
445	SRR25158452	PRJNA983538	SAMN35729760	SRX20906535	6.33 Gb	others	Asia	China	31.25	118.32	—	China_S70	10.1038/s41467-023-43000-z
446	SRR25158455	PRJNA983538	SAMN35729757	SRX20906532	7.42 Gb	maize	Asia	China	31.6764	117.221	—	China_S66	10.1038/s41467-023-43000-z
447	SRR25158459	PRJNA983538	SAMN35729755	SRX20906528	6.96 Gb	others	Asia	China	30.6453	117.422	—	China_S62	10.1038/s41467-023-43000-z
448	SRR25158464	PRJNA983538	SAMN35729750	SRX20906523	6.30 Gb	others	Asia	China	30.6439	117.493	—	China_S58	10.1038/s41467-023-43000-z
449	SRR25158465	PRJNA983538	SAMN35729749	SRX20906522	7.18 Gb	others	Asia	China	30.6542	117.416	—	China_S57	10.1038/s41467-023-43000-z
450	SRR25158466	PRJNA983538	SAMN35729748	SRX20906521	6.68 Gb	others	Asia	China	30.6542	117.413	—	China_S56	10.1038/s41467-023-43000-z
451	SRR25158467	PRJNA983538	SAMN35729747	SRX20906520	7.17 Gb	vegetable	Asia	China	37.4022	117.929	—	China_S52	10.1038/s41467-023-43000-z
452	SRR25158468	PRJNA983538	SAMN35729576	SRX20906519	7.79 Gb	rice	Asia	China	22.8889	108.373	—	China_S127	10.1038/s41467-023-43000-z
453	SRR25158470	PRJNA983538	SAMN35729745	SRX20906517	6.15 Gb	vegetable	Asia	China	37.5817	118.044	—	China_S50	10.1038/s41467-023-43000-z
454	SRR25158471	PRJNA983538	SAMN35729744	SRX20906516	6.18 Gb	maize	Asia	China	32.9625	113.77	—	China_S5	10.1038/s41467-023-43000-z
455	SRR25158472	PRJNA983538	SAMN35729743	SRX20906515	6.55 Gb	vegetable	Asia	China	36.5147	117.855	—	China_S49	10.1038/s41467-023-43000-z
456	SRR25158474	PRJNA983538	SAMN35729741	SRX20906513	6.80 Gb	vegetable	Asia	China	36.4461	117.969	—	China_S47	10.1038/s41467-023-43000-z
457	SRR25158475	PRJNA983538	SAMN35729740	SRX20906512	6.85 Gb	fruit	Asia	China	36.3989	118.019	—	China_S46	10.1038/s41467-023-43000-z
458	SRR25158476	PRJNA983538	SAMN35729739	SRX20906511	6.80 Gb	rice	Asia	China	27.1461	110.033	—	China_S42	10.1038/s41467-023-43000-z
459	SRR25158479	PRJNA983538	SAMN35729575	SRX20906508	6.88 Gb	vegetable	Asia	China	22.9244	108.541	—	China_S126	10.1038/s41467-023-43000-z
460	SRR25158480	PRJNA983538	SAMN35729736	SRX20906507	7.90 Gb	vegetable	Asia	China	27.7562	118.023	—	China_S406	10.1038/s41467-023-43000-z
461	SRR25158481	PRJNA983538	SAMN35729735	SRX20906506	7.68 Gb	wheat	Asia	China	39.9297	116.402	—	China_S405	10.1038/s41467-023-43000-z
462	SRR25158483	PRJNA983538	SAMN35729733	SRX20906504	7.77 Gb	rice	Asia	China	47.3688	123.926	—	China_S403	10.1038/s41467-023-43000-z
463	SRR25158484	PRJNA983538	SAMN35729732	SRX20906503	7.96 Gb	maize	Asia	China	38.8753	115.494	—	China_S402	10.1038/s41467-023-43000-z
464	SRR25158486	PRJNA983538	SAMN35729730	SRX20906501	6.44 Gb	others	Asia	China	39.1128	117.206	—	China_S400	10.1038/s41467-023-43000-z
465	SRR25158487	PRJNA983538	SAMN35729729	SRX20906500	7.43 Gb	wheat	Asia	China	32.96	113.077	—	China_S4	10.1038/s41467-023-43000-z
466	SRR25158489	PRJNA983538	SAMN35729727	SRX20906498	7.72 Gb	rice	Asia	China	29.6604	115.952	—	China_S393	10.1038/s41467-023-43000-z
467	SRR25158490	PRJNA983538	SAMN35729574	SRX20906497	7.39 Gb	rice	Asia	China	22.8653	108.338	—	China_S125	10.1038/s41467-023-43000-z
468	SRR25158491	PRJNA983538	SAMN35729726	SRX20906496	7.53 Gb	others	Asia	China	29.5731	103.75	—	China_S391	10.1038/s41467-023-43000-z
469	SRR25158492	PRJNA983538	SAMN35729725	SRX20906495	7.80 Gb	maize	Asia	China	35.2072	114.676	—	China_S390	10.1038/s41467-023-43000-z
470	SRR25158494	PRJNA983538	SAMN35729723	SRX20906493	8.48 Gb	vegetable	Asia	China	28.4984	119.904	—	China_S387	10.1038/s41467-023-43000-z
471	SRR25158495	PRJNA983538	SAMN35729722	SRX20906492	6.07 Gb	vegetable	Asia	China	28.4984	119.904	—	China_S386	10.1038/s41467-023-43000-z
472	SRR25158496	PRJNA983538	SAMN35729721	SRX20906491	7.82 Gb	vegetable	Asia	China	28.4984	119.904	—	China_S385	10.1038/s41467-023-43000-z
473	SRR25158497	PRJNA983538	SAMN35729720	SRX20906490	7.06 Gb	vegetable	Asia	China	28.4984	119.904	—	China_S384	10.1038/s41467-023-43000-z
474	SRR25158501	PRJNA983538	SAMN35729573	SRX20906486	6.19 Gb	rice	Asia	China	24.2836	109.408	—	China_S122	10.1038/s41467-023-43000-z
475	SRR25158502	PRJNA983538	SAMN35729716	SRX20906485	6.79 Gb	rice	Asia	China	25.8	113.022	—	China_S38	10.1038/s41467-023-43000-z
476	SRR25158507	PRJNA983538	SAMN35729682	SRX20906480	5.82 Gb	others	Asia	China	29.625	103.568	—	China_S309	10.1038/s41467-023-43000-z
477	SRR25158508	PRJNA983538	SAMN35729681	SRX20906479	5.90 Gb	vegetable	Asia	China	28.8317	104.616	—	China_S308	10.1038/s41467-023-43000-z
478	SRR25158510	PRJNA983538	SAMN35729679	SRX20906477	7.09 Gb	maize	Asia	China	34.4131	109.139	—	China_S297	10.1038/s41467-023-43000-z
479	SRR25158511	PRJNA983538	SAMN35729678	SRX20906476	7.20 Gb	maize	Asia	China	34.0497	108.909	—	China_S296	10.1038/s41467-023-43000-z
480	SRR25158515	PRJNA983538	SAMN35729675	SRX20906472	5.95 Gb	maize	Asia	China	34.2525	108.983	—	China_S288	10.1038/s41467-023-43000-z
481	SRR25158517	PRJNA983538	SAMN35729673	SRX20906470	7.15 Gb	maize	Asia	China	39.2242	113.398	—	China_S286	10.1038/s41467-023-43000-z
482	SRR25158519	PRJNA983538	SAMN35729671	SRX20906468	7.18 Gb	fruit	Asia	China	37.4217	112.299	—	China_S284	10.1038/s41467-023-43000-z
483	SRR25158520	PRJNA983538	SAMN35729670	SRX20906467	8.32 Gb	fruit	Asia	China	37.4217	112.299	—	China_S283	10.1038/s41467-023-43000-z
484	SRR25158521	PRJNA983538	SAMN35729669	SRX20906466	6.47 Gb	maize	Asia	China	37.5117	112.332	—	China_S281	10.1038/s41467-023-43000-z
485	SRR25158524	PRJNA983538	SAMN35729568	SRX20906463	6.95 Gb	rice	Asia	China	25.0689	110.283	—	China_S114	10.1038/s41467-023-43000-z
486	SRR25158528	PRJNA983538	SAMN35729663	SRX20906459	6.96 Gb	others	Asia	China	36.08	120.364	—	China_S271	10.1038/s41467-023-43000-z
487	SRR25158531	PRJNA983538	SAMN35729660	SRX20906456	7.38 Gb	fruit	Asia	China	37.4636	121.378	—	China_S268	10.1038/s41467-023-43000-z
488	SRR25158532	PRJNA983538	SAMN35729659	SRX20906455	8.00 Gb	others	Asia	China	41.7711	123.438	—	China_S265	10.1038/s41467-023-43000-z
489	SRR25158533	PRJNA983538	SAMN35729658	SRX20906454	7.47 Gb	maize	Asia	China	41.6417	123.615	—	China_S264	10.1038/s41467-023-43000-z
490	SRR25158534	PRJNA983538	SAMN35729657	SRX20906453	7.63 Gb	others	Asia	China	41.7708	123.439	—	China_S263	10.1038/s41467-023-43000-z
491	SRR25456141	PRJNA1000080	SAMN36758330	SRX21188951	4.31 Gb	wheat	Asia	India	26.2228	78.1887	—	CN-3	—
492	SRR25456142	PRJNA1000080	SAMN36758330	SRX21188950	5.32 Gb	wheat	Asia	India	26.2228	78.1887	—	CN-2	—
493	SRR25456143	PRJNA1000080	SAMN36758330	SRX21188949	2.59 Gb	wheat	Asia	India	26.2228	78.1887	—	CN-1	—
494	SRR25456144	PRJNA1000080	SAMN36758329	SRX21188948	7.29 Gb	wheat	Asia	India	26.2229	78.1887	—	CA-3	—
495	SRR25456145	PRJNA1000080	SAMN36758329	SRX21188947	8.79 Gb	wheat	Asia	India	26.2229	78.1887	—	CA-2	—
496	SRR25456146	PRJNA1000080	SAMN36758329	SRX21188946	4.82 Gb	wheat	Asia	India	26.2229	78.1887	—	CA-1	—
497	SRR908279	PRJNA208116	SAMN02202255	SRX310217	9.09 Gb	wheat	Asia	Israel	31.99	34.82	—	—	10.1038/ncomms5950
498	SRR908281	PRJNA208116	SAMN02202255	SRX310217	6.14 Gb	wheat	Asia	Israel	31.99	34.82	—	—	10.1038/ncomms5950
499	SRR908290	PRJNA208116	SAMN02202255	SRX310217	3.92 Gb	wheat	Asia	Israel	31.99	34.82	—	—	10.1038/ncomms5950
500	SRR908291	PRJNA208116	SAMN02202255	SRX310217	4.13 Gb	wheat	Asia	Israel	31.99	34.82	—	—	10.1038/ncomms5950
501	SRR8931191	PRJNA533779	SAMN11466677	SRX5712059	1.40 Gb	maize	North America	United States	43	-92.5	—	SC48_AH18_S18_L006	10.1371/journal.pone.0222470
502	SRR8931197	PRJNA533779	SAMN11466657	SRX5712053	4.53 Gb	maize	North America	United States	43	-92.5	—	SC28_A60_S60_L008	10.1371/journal.pone.0222470
503	SRR8931198	PRJNA533779	SAMN11466656	SRX5712052	4.79 Gb	maize	North America	United States	43	-92.5	—	SC27_A59_S59_L008	10.1371/journal.pone.0222470
504	SRR8931204	PRJNA533779	SAMN11466679	SRX5712046	1.40 Gb	maize	North America	United States	43	-92.5	—	SC50_AH20_S20_L006	10.1371/journal.pone.0222470
505	SRR8931205	PRJNA533779	SAMN11466678	SRX5712045	1.42 Gb	maize	North America	United States	43	-92.5	—	SC49_AH19_S19_L006	10.1371/journal.pone.0222470
506	SRR8931206	PRJNA533779	SAMN11466659	SRX5712044	4.85 Gb	maize	North America	United States	43	-92.5	—	SC30_A62_S62_L008	10.1371/journal.pone.0222470
507	SRR8931207	PRJNA533779	SAMN11466658	SRX5712043	5.20 Gb	maize	North America	United States	43	-92.5	—	SC29_A61_S61_L008	10.1371/journal.pone.0222470
508	SRR8931209	PRJNA533779	SAMN11466676	SRX5712041	1.32 Gb	maize	North America	United States	43	-92.5	—	SC47_AH17_S17_L006	10.1371/journal.pone.0222470
509	SRR8931223	PRJNA533779	SAMN11466684	SRX5712027	1.66 Gb	maize	North America	United States	43	-92.5	—	SC55_AH29_S21_L006	10.1371/journal.pone.0222470
510	SRR8931224	PRJNA533779	SAMN11466685	SRX5712026	1.41 Gb	maize	North America	United States	43	-92.5	—	SC56_AH32_S24_L006	10.1371/journal.pone.0222470
511	SRR8931225	PRJNA533779	SAMN11466680	SRX5712025	1.05 Gb	maize	North America	United States	43	-92.5	—	SC51_AH21_S25_L006	10.1371/journal.pone.0222470
512	SRR8931226	PRJNA533779	SAMN11466681	SRX5712024	1.17 Gb	maize	North America	United States	43	-92.5	—	SC52_AH24_S28_L006	10.1371/journal.pone.0222470
513	SRR8931227	PRJNA533779	SAMN11466682	SRX5712023	1.10 Gb	maize	North America	United States	43	-92.5	—	SC53_AH25_S29_L006	10.1371/journal.pone.0222470
514	SRR8931228	PRJNA533779	SAMN11466683	SRX5712022	1.12 Gb	maize	North America	United States	43	-92.5	—	SC54_AH28_S32_L006	10.1371/journal.pone.0222470
515	SRR8931235	PRJNA533779	SAMN11466660	SRX5712015	4.04 Gb	maize	North America	United States	43	-92.5	—	SC31_A63_S63_L008	10.1371/journal.pone.0222470
516	SRR8931236	PRJNA533779	SAMN11466661	SRX5712014	4.84 Gb	maize	North America	United States	43	-92.5	—	SC32_A64_S64_L008	10.1371/journal.pone.0222470
517	SRR8487012	PRJNA646773	SAMN15565762	SRX5291648	3.79 Gb	others	North America	United States	38.5356	-121.773	—	B8R2H_BULK_S148_L006	10.1128/mSystems.00614-21
518	SRR8487013	PRJNA646773	SAMN15565766	SRX5291647	3.28 Gb	others	North America	United States	38.5356	-121.773	—	B8R2L_BULK_S147_L006	10.1128/mSystems.00614-21
519	SRR8487024	PRJNA646773	SAMN15565737	SRX5291636	1.20 Gb	others	North America	United States	38.5356	-121.773	—	B0H_BULK_S59_L006	10.1128/mSystems.00614-21
520	SRR8487025	PRJNA646773	SAMN15565741	SRX5291635	1.41 Gb	others	North America	United States	38.5356	-121.773	—	B0L_BULK_S58_L006	10.1128/mSystems.00614-21
521	SRR8487026	PRJNA646773	SAMN15565739	SRX5291634	3.32 Gb	others	North America	United States	38.5356	-121.773	—	B0H_BULK_S142_L006	10.1128/mSystems.00614-21
522	SRR8487027	PRJNA646773	SAMN15565743	SRX5291633	3.63 Gb	others	North America	United States	38.5356	-121.773	—	B0L_BULK_S141_L006	10.1128/mSystems.00614-21
523	SRR8487028	PRJNA646773	SAMN15565745	SRX5291632	1.45 Gb	others	North America	United States	38.5356	-121.773	—	B2R2H_BULK_S61_L006	10.1128/mSystems.00614-21
524	SRR8487029	PRJNA646773	SAMN15565749	SRX5291631	1.32 Gb	others	North America	United States	38.5356	-121.773	—	B2R2L_BULK_S60_L006	10.1128/mSystems.00614-21
525	SRR8487030	PRJNA646773	SAMN15565747	SRX5291630	3.84 Gb	others	North America	United States	38.5356	-121.773	—	B2R2H_BULK_S144_L006	10.1128/mSystems.00614-21
526	SRR8487031	PRJNA646773	SAMN15565751	SRX5291629	2.67 Gb	others	North America	United States	38.5356	-121.773	—	B2R2L_BULK_S143_L006	10.1128/mSystems.00614-21
527	SRR8487032	PRJNA646773	SAMN15565753	SRX5291628	1.39 Gb	others	North America	United States	38.5356	-121.773	—	B3R2H_BULK_S65_L006	10.1128/mSystems.00614-21
528	SRR8487033	PRJNA646773	SAMN15565757	SRX5291627	1.32 Gb	others	North America	United States	38.5356	-121.773	—	B3R2L_BULK_S62_L006	10.1128/mSystems.00614-21
529	SRR8487037	PRJNA646773	SAMN15565760	SRX5291623	1.33 Gb	others	North America	United States	38.5356	-121.773	—	B8R2H_BULK_S63_L006	10.1128/mSystems.00614-21
530	SRR8487038	PRJNA646773	SAMN15565764	SRX5291622	1.51 Gb	others	North America	United States	38.5356	-121.773	—	B8R2L_BULK_S64_L006	10.1128/mSystems.00614-21
531	SRR8487039	PRJNA646773	SAMN15565755	SRX5291621	3.50 Gb	others	North America	United States	38.5356	-121.773	—	B3R2H_BULK_S146_L006	10.1128/mSystems.00614-21
532	SRR8487040	PRJNA646773	SAMN15565758	SRX5291620	2.98 Gb	others	North America	United States	38.5356	-121.773	—	B3R2L_BULK_S145_L006	10.1128/mSystems.00614-21
533	SRR10159347	PRJNA562057	SAMN12633281	SRX6884749	2.90 Gb	rice	Asia	China	28.21	116.93	—	Top.soil9	10.1007/S11104-021-04987-W
534	SRR10159348	PRJNA562057	SAMN12633280	SRX6884748	3.58 Gb	rice	Asia	China	28.21	116.93	—	Top.soil6	10.1007/S11104-021-04987-W
535	SRR10159349	PRJNA562057	SAMN12633279	SRX6884747	3.10 Gb	rice	Asia	China	28.21	116.93	—	Top.soil10	10.1007/S11104-021-04987-W
536	SRR10159350	PRJNA562057	SAMN12633278	SRX6884746	6.14 Gb	rice	Asia	China	28.21	116.93	—	Rhizosphere.soil9	10.1007/S11104-021-04987-W
537	SRR10159351	PRJNA562057	SAMN12633277	SRX6884745	2.47 Gb	rice	Asia	China	28.21	116.93	—	Rhizosphere.soil6	10.1007/S11104-021-04987-W
538	SRR10159352	PRJNA562057	SAMN12633276	SRX6884744	5.31 Gb	rice	Asia	China	28.21	116.93	—	Rhizosphere.soil10	10.1007/S11104-021-04987-W
539	SRR10159353	PRJNA562057	SAMN12633275	SRX6884743	5.58 Gb	rice	Asia	China	28.21	116.93	—	Bulk.soil9	10.1007/S11104-021-04987-W
540	SRR10159354	PRJNA562057	SAMN12633274	SRX6884742	2.46 Gb	rice	Asia	China	28.21	116.93	—	Bulk.soil6	10.1007/S11104-021-04987-W
541	SRR10159355	PRJNA562057	SAMN12633273	SRX6884741	4.75 Gb	rice	Asia	China	28.21	116.93	—	Bulk.soil10	10.1007/S11104-021-04987-W
542	SRR10159356	PRJNA562057	SAMN12633272	SRX6884740	3.30 Gb	rice	Asia	China	28.21	116.93	—	Soil before planting	10.1007/S11104-021-04987-W
543	SRR10585487	PRJNA593573	SAMN13481444	SRX7265903	2.38 Gb	vegetable	Asia	Singapore	1.42	103.7	—	KL1RZSR4D	10.1038/S41597-020-00617-9
544	SRR10585488	PRJNA593573	SAMN13481443	SRX7265902	2.67 Gb	vegetable	Asia	Singapore	1.42	103.7	—	KL1RZSR3D	10.1038/S41597-020-00617-9
545	SRR10585489	PRJNA593573	SAMN13481442	SRX7265901	2.06 Gb	vegetable	Asia	Singapore	1.42	103.7	—	KL1RZSR2D	10.1038/S41597-020-00617-9
546	SRR10585490	PRJNA593573	SAMN13481441	SRX7265900	2.00 Gb	vegetable	Asia	Singapore	1.42	103.7	—	KL1RZSR1D	10.1038/S41597-020-00617-9
547	SRR10585504	PRJNA593573	SAMN13481428	SRX7265886	2.43 Gb	vegetable	Asia	Singapore	1.42	103.7	—	CS1RZSR4D	10.1038/S41597-020-00617-9
548	SRR10585505	PRJNA593573	SAMN13481427	SRX7265885	2.03 Gb	vegetable	Asia	Singapore	1.42	103.7	—	CS1RZSR3D	10.1038/S41597-020-00617-9
549	SRR10585506	PRJNA593573	SAMN13481426	SRX7265884	2.16 Gb	vegetable	Asia	Singapore	1.42	103.7	—	CS1RZSR2D	10.1038/S41597-020-00617-9
550	SRR10585508	PRJNA593573	SAMN13481425	SRX7265882	1.85 Gb	vegetable	Asia	Singapore	1.42	103.7	—	CS1RZSR1D	10.1038/S41597-020-00617-9
551	SRR10585522	PRJNA593573	SAMN13481412	SRX7265868	2.32 Gb	vegetable	Asia	Singapore	1.42	103.7	—	BY1RZSR4D	10.1038/S41597-020-00617-9
552	SRR10585523	PRJNA593573	SAMN13481411	SRX7265867	2.18 Gb	vegetable	Asia	Singapore	1.42	103.7	—	BY1RZSR3D	10.1038/S41597-020-00617-9
553	SRR10585524	PRJNA593573	SAMN13481410	SRX7265866	1.85 Gb	vegetable	Asia	Singapore	1.42	103.7	—	BY1RZSR2D	10.1038/S41597-020-00617-9
554	SRR10585525	PRJNA593573	SAMN13481409	SRX7265865	2.47 Gb	vegetable	Asia	Singapore	1.42	103.7	—	BY1RZSR1D	10.1038/S41597-020-00617-9
555	SRR10585532	PRJNA593573	SAMN13481403	SRX7265858	1.38 Gb	vegetable	Asia	Singapore	1.42	103.7	—	KL2RZSR4G	10.1038/S41597-020-00617-9
556	SRR10585533	PRJNA593573	SAMN13481402	SRX7265857	1.36 Gb	vegetable	Asia	Singapore	1.42	103.7	—	KL2RZSR3G	10.1038/S41597-020-00617-9
557	SRR10585534	PRJNA593573	SAMN13481401	SRX7265856	1.48 Gb	vegetable	Asia	Singapore	1.42	103.7	—	KL2RZSR2G	10.1038/S41597-020-00617-9
558	SRR10585535	PRJNA593573	SAMN13481400	SRX7265855	1.59 Gb	vegetable	Asia	Singapore	1.42	103.7	—	KL2RZSR1G	10.1038/S41597-020-00617-9
559	SRR10585549	PRJNA593573	SAMN13481387	SRX7265841	1.51 Gb	vegetable	Asia	Singapore	1.42	103.7	—	CS2RZSR4G	10.1038/S41597-020-00617-9
560	SRR10585550	PRJNA593573	SAMN13481386	SRX7265840	1.46 Gb	vegetable	Asia	Singapore	1.42	103.7	—	CS2RZSR3G	10.1038/S41597-020-00617-9
561	SRR10585552	PRJNA593573	SAMN13481385	SRX7265838	1.40 Gb	vegetable	Asia	Singapore	1.42	103.7	—	CS2RZSR2G	10.1038/S41597-020-00617-9
562	SRR10585553	PRJNA593573	SAMN13481384	SRX7265837	1.39 Gb	vegetable	Asia	Singapore	1.42	103.7	—	CS2RZSR1G	10.1038/S41597-020-00617-9
563	SRR10585567	PRJNA593573	SAMN13481371	SRX7265823	1.64 Gb	vegetable	Asia	Singapore	1.42	103.7	—	BY2RZSR4G	10.1038/S41597-020-00617-9
564	SRR10585568	PRJNA593573	SAMN13481370	SRX7265822	1.60 Gb	vegetable	Asia	Singapore	1.42	103.7	—	BY2RZSR3G	10.1038/S41597-020-00617-9
565	SRR10585569	PRJNA593573	SAMN13481369	SRX7265821	1.49 Gb	vegetable	Asia	Singapore	1.42	103.7	—	BY2RZSR2G	10.1038/S41597-020-00617-9
566	SRR10585570	PRJNA593573	SAMN13481368	SRX7265820	1.71 Gb	vegetable	Asia	Singapore	1.42	103.7	—	BY2RZSR1G	10.1038/S41597-020-00617-9
567	SRR10586121	PRJNA593573	SAMN13482106	SRX7266468	1.89 Gb	vegetable	Asia	Singapore	1.42	103.7	—	BYBSR1	10.1038/S41597-020-00617-9
568	SRR10586122	PRJNA593573	SAMN13482105	SRX7266467	1.42 Gb	vegetable	Asia	Singapore	1.42	103.7	—	KLBSR3G	10.1038/S41597-020-00617-9
569	SRR10586123	PRJNA593573	SAMN13482104	SRX7266466	1.41 Gb	vegetable	Asia	Singapore	1.42	103.7	—	KLBSR2G	10.1038/S41597-020-00617-9
570	SRR10586124	PRJNA593573	SAMN13482103	SRX7266465	1.68 Gb	vegetable	Asia	Singapore	1.42	103.7	—	KLBSR1G	10.1038/S41597-020-00617-9
571	SRR10586125	PRJNA593573	SAMN13482102	SRX7266464	1.28 Gb	vegetable	Asia	Singapore	1.42	103.7	—	CSBSR3G	10.1038/S41597-020-00617-9
572	SRR10586126	PRJNA593573	SAMN13482101	SRX7266463	1.42 Gb	vegetable	Asia	Singapore	1.42	103.7	—	CSBSR2G	10.1038/S41597-020-00617-9
573	SRR10586127	PRJNA593573	SAMN13482100	SRX7266462	1.38 Gb	vegetable	Asia	Singapore	1.42	103.7	—	CSBSR1G	10.1038/S41597-020-00617-9
574	SRR10586129	PRJNA593573	SAMN13482114	SRX7266460	2.07 Gb	vegetable	Asia	Singapore	1.42	103.7	—	CSBSR3	10.1038/S41597-020-00617-9
575	SRR10586130	PRJNA593573	SAMN13482113	SRX7266459	2.12 Gb	vegetable	Asia	Singapore	1.42	103.7	—	CSBSR2	10.1038/S41597-020-00617-9
576	SRR10586131	PRJNA593573	SAMN13482112	SRX7266458	2.15 Gb	vegetable	Asia	Singapore	1.42	103.7	—	CSBSR1	10.1038/S41597-020-00617-9
577	SRR10586135	PRJNA593573	SAMN13482108	SRX7266454	1.86 Gb	vegetable	Asia	Singapore	1.42	103.7	—	BYBSR3	10.1038/S41597-020-00617-9
578	SRR10586136	PRJNA593573	SAMN13482107	SRX7266453	2.17 Gb	vegetable	Asia	Singapore	1.42	103.7	—	BYBSR2	10.1038/S41597-020-00617-9
579	SRR11449177	PRJNA616167	SAMN14483312	SRX8026947	3.60 Gb	vegetable	Asia	China	34.57	116.42	—	NYJ1	10.21203/rs.3.rs-21965/v1
580	SRR11449178	PRJNA616167	SAMN14483311	SRX8026946	3.73 Gb	vegetable	Asia	China	34.55	116.31	—	N.Na3	10.21203/rs.3.rs-21965/v1
581	SRR11449179	PRJNA616167	SAMN14483310	SRX8026945	3.28 Gb	vegetable	Asia	China	34.45	116.29	—	N.Na2	10.21203/rs.3.rs-21965/v1
582	SRR11449180	PRJNA616167	SAMN14483309	SRX8026944	3.43 Gb	vegetable	Asia	China	34.35	116.19	—	N.Na1	10.21203/rs.3.rs-21965/v1
583	SRR11449181	PRJNA616167	SAMN14483308	SRX8026943	3.39 Gb	vegetable	Asia	China	35.44	115.88	—	NHC3	10.21203/rs.3.rs-21965/v1
584	SRR11449182	PRJNA616167	SAMN14483307	SRX8026942	3.88 Gb	vegetable	Asia	China	35.34	115.78	—	NHC2	10.21203/rs.3.rs-21965/v1
585	SRR11449183	PRJNA616167	SAMN14483306	SRX8026941	3.49 Gb	vegetable	Asia	China	35.24	115.68	—	NHC1	10.21203/rs.3.rs-21965/v1
586	SRR11449184	PRJNA616167	SAMN14483305	SRX8026940	4.09 Gb	vegetable	Asia	China	35.14	115.54	—	C-3	10.21203/rs.3.rs-21965/v1
587	SRR11449185	PRJNA616167	SAMN14483314	SRX8026939	3.82 Gb	vegetable	Asia	China	34.75	116.64	—	NYJ3	10.21203/rs.3.rs-21965/v1
588	SRR11449186	PRJNA616167	SAMN14483313	SRX8026938	3.71 Gb	vegetable	Asia	China	34.65	116.53	—	NYJ2	10.21203/rs.3.rs-21965/v1
589	SRR11449187	PRJNA616167	SAMN14483304	SRX8026937	3.95 Gb	vegetable	Asia	China	33.02	113.93	—	C-2	10.21203/rs.3.rs-21965/v1
590	SRR11449188	PRJNA616167	SAMN14483303	SRX8026936	3.59 Gb	vegetable	Asia	China	35.07	115.52	—	C-1	10.21203/rs.3.rs-21965/v1
591	SRR12773037	PRJNA667256	SAMN16362768	SRX9243564	1.86 Gb	wheat	North America	United States	49.7002	-112.763	—	BB1_PoPest_3_R1	10.1111/1758-2229.12990
592	SRR12773038	PRJNA667256	SAMN16362766	SRX9243563	1.96 Gb	wheat	North America	United States	49.7002	-112.763	—	BB1_PoPest_5_R1	10.1111/1758-2229.12990
593	SRR12773039	PRJNA667256	SAMN16362764	SRX9243562	1.93 Gb	wheat	North America	United States	49.7002	-112.763	—	BB2_PoPest_4_R1	10.1111/1758-2229.12990
594	SRR12773044	PRJNA667256	SAMN16362782	SRX9243557	1.96 Gb	wheat	North America	United States	49.7002	-112.763	—	BB1_PrPest_1_R1	10.1111/1758-2229.12990
595	SRR12773045	PRJNA667256	SAMN16362780	SRX9243556	2.04 Gb	wheat	North America	United States	49.7002	-112.763	—	BB2_PrPest_2_R1	10.1111/1758-2229.12990
596	SRR12773046	PRJNA667256	SAMN16362762	SRX9243555	1.60 Gb	wheat	North America	United States	49.7002	-112.763	—	BB2_PrPest_4_R1	10.1111/1758-2229.12990
597	SRR12773047	PRJNA667256	SAMN16362778	SRX9243554	2.05 Gb	wheat	North America	United States	49.7002	-112.763	—	BB1_PoPest_1_R1	10.1111/1758-2229.12990
598	SRR12773048	PRJNA667256	SAMN16362776	SRX9243553	1.56 Gb	wheat	North America	United States	49.7002	-112.763	—	BB2_PoPest_6_R1	10.1111/1758-2229.12990
599	SRR12773049	PRJNA667256	SAMN16362774	SRX9243552	2.12 Gb	wheat	North America	United States	49.7002	-112.763	—	BB1_PrPest_5_R1	10.1111/1758-2229.12990
600	SRR12773050	PRJNA667256	SAMN16362772	SRX9243551	2.36 Gb	wheat	North America	United States	49.7002	-112.763	—	BB1_PrPest_3_R1	10.1111/1758-2229.12990
601	SRR12773051	PRJNA667256	SAMN16362770	SRX9243550	2.13 Gb	wheat	North America	United States	49.7002	-112.763	—	BB2_PrPest_6_R1	10.1111/1758-2229.12990
602	SRR26545558	PRJNA1032917	SAMN38018887	SRX22247715	946.96 Mb	vegetable	Europe	Netherlands	53.1515	7.1139	-4	L0244_meta	10.1016/j.envint.2024.108917
603	SRR26545561	PRJNA1032917	SAMN38018884	SRX22247712	939.51 Mb	vegetable	Europe	Netherlands	53.0224	6.9739	2	L0238_meta	10.1016/j.envint.2024.108917
604	SRR26545564	PRJNA1032917	SAMN38018768	SRX22247709	678.21 Mb	wheat	Europe	Germany	50.4831	8.746	207	L0106_meta	10.1016/j.envint.2024.108917
605	SRR26545565	PRJNA1032917	SAMN38018767	SRX22247708	916.52 Mb	others	Europe	Spain	38.7291	-3.8539	667	L0105_meta	10.1016/j.envint.2024.108917
606	SRR26545567	PRJNA1032917	SAMN38018765	SRX22247706	1.54 Gb	others	Europe	Spain	39.4797	-1.9466	799	L0103_meta	10.1016/j.envint.2024.108917
607	SRR26545569	PRJNA1032917	SAMN38018763	SRX22247704	1.03 Gb	others	Europe	Spain	39.4129	-1.747	749	L0101_meta	10.1016/j.envint.2024.108917
608	SRR26545571	PRJNA1032917	SAMN38018761	SRX22247702	983.90 Mb	others	Europe	Greece	41.4234	26.5795	23	L0099_meta	10.1016/j.envint.2024.108917
609	SRR26545574	PRJNA1032917	SAMN38018759	SRX22247699	836.29 Mb	others	Europe	Spain	42.5361	-3.1926	769	L0097_meta	10.1016/j.envint.2024.108917
610	SRR26545576	PRJNA1032917	SAMN38018757	SRX22247697	999.42 Mb	others	Europe	Spain	41.5979	-4.7906	688	L0095_meta	10.1016/j.envint.2024.108917
611	SRR26545578	PRJNA1032917	SAMN38018755	SRX22247695	1,003.64 Mb	others	Europe	Greece	39.5171	22.3758	124	L0093_meta	10.1016/j.envint.2024.108917
612	SRR26545583	PRJNA1032917	SAMN38018750	SRX22247690	900.46 Mb	wheat	Europe	Germany	47.8246	9.1857	653	L0086_meta	10.1016/j.envint.2024.108917
613	SRR26545592	PRJNA1032917	SAMN38018742	SRX22247681	1,016.12 Mb	wheat	Europe	Slovakia	48.3808	17.8027	216	L0077_meta	10.1016/j.envint.2024.108917
614	SRR26545595	PRJNA1032917	SAMN38018677	SRX22247678	985.20 Mb	wheat	Europe	France	46.9025	1.5469	153	L0008_meta	10.1016/j.envint.2024.108917
615	SRR26545596	PRJNA1032917	SAMN38018739	SRX22247677	843.31 Mb	wheat	Europe	Spain	37.454	-5.2177	196	L0073_meta	10.1016/j.envint.2024.108917
616	SRR26545598	PRJNA1032917	SAMN38018737	SRX22247675	1.02 Gb	others	Europe	Spain	38.8661	-4.0461	639	L0070_meta	10.1016/j.envint.2024.108917
617	SRR26545599	PRJNA1032917	SAMN38018736	SRX22247674	689.05 Mb	maize	Europe	Hungary	46.2865	18.6941	86	L0069_meta	10.1016/j.envint.2024.108917
618	SRR26545600	PRJNA1032917	SAMN38019327	SRX22247673	1.06 Gb	maize	Europe	Austria	48.4344	15.7477	194	L0884_meta	10.1016/j.envint.2024.108917
619	SRR26545601	PRJNA1032917	SAMN38019326	SRX22247672	979.95 Mb	maize	Europe	France	48.0473	1.6007	130	L0883_meta	10.1016/j.envint.2024.108917
620	SRR26545602	PRJNA1032917	SAMN38019325	SRX22247671	951.56 Mb	wheat	Europe	Poland	50.7882	21.786	203	L0882_meta	10.1016/j.envint.2024.108917
621	SRR26545603	PRJNA1032917	SAMN38019324	SRX22247670	1,009.05 Mb	others	Europe	Poland	53.8172	19.1212	70	L0881_meta	10.1016/j.envint.2024.108917
622	SRR26545605	PRJNA1032917	SAMN38019322	SRX22247668	929.76 Mb	wheat	Europe	Bulgaria	42.6118	26.5144	140	L0876_meta	10.1016/j.envint.2024.108917
623	SRR26545606	PRJNA1032917	SAMN38019321	SRX22247667	948.76 Mb	maize	Europe	Romania	44.8285	25.6169	205	L0875_meta	10.1016/j.envint.2024.108917
624	SRR26545607	PRJNA1032917	SAMN38019320	SRX22247666	970.16 Mb	vegetable	Europe	Sweden	55.5134	14.005	66	L0874_meta	10.1016/j.envint.2024.108917
625	SRR26545609	PRJNA1032917	SAMN38019319	SRX22247664	1.03 Gb	wheat	Europe	Bulgaria	42.4242	26.5364	124	L0873_meta	10.1016/j.envint.2024.108917
626	SRR26545610	PRJNA1032917	SAMN38019318	SRX22247663	968.92 Mb	wheat	Europe	Poland	50.9319	21.0726	305	L0872_meta	10.1016/j.envint.2024.108917
627	SRR26545612	PRJNA1032917	SAMN38019316	SRX22247661	786.70 Mb	others	Europe	Greece	38.369	23.2928	103	L0867_meta	10.1016/j.envint.2024.108917
628	SRR26545615	PRJNA1032917	SAMN38019284	SRX22247658	1.07 Gb	maize	Europe	France	49.0699	3.3539	215	L0819_meta	10.1016/j.envint.2024.108917
629	SRR26545618	PRJNA1032917	SAMN38019281	SRX22247655	893.22 Mb	maize	Europe	Romania	45.1946	27.7889	16	L0816_meta	10.1016/j.envint.2024.108917
630	SRR26545621	PRJNA1032917	SAMN38019279	SRX22247652	1.07 Gb	vegetable	Europe	United Kingdom	51.1163	-4.1984	11	L0813_meta	10.1016/j.envint.2024.108917
631	SRR26545622	PRJNA1032917	SAMN38019278	SRX22247651	886.23 Mb	wheat	Europe	Romania	44.6508	28.1583	85	L0812_meta	10.1016/j.envint.2024.108917
632	SRR26545625	PRJNA1032917	SAMN38019275	SRX22247648	915.58 Mb	wheat	Europe	France	47.6816	2.545	155	L0809_meta	10.1016/j.envint.2024.108917
633	SRR26545626	PRJNA1032917	SAMN38019274	SRX22247647	947.74 Mb	maize	Europe	France	47.8081	1.3176	122	L0807_meta	10.1016/j.envint.2024.108917
634	SRR26545627	PRJNA1032917	SAMN38019273	SRX22247646	1.03 Gb	wheat	Europe	Romania	44.7017	26.2014	93	L0806_meta	10.1016/j.envint.2024.108917
635	SRR26545629	PRJNA1032917	SAMN38019271	SRX22247644	1,013.44 Mb	wheat	Europe	Romania	43.9749	28.53	48	L0802_meta	10.1016/j.envint.2024.108917
636	SRR26545630	PRJNA1032917	SAMN38019270	SRX22247643	950.33 Mb	wheat	Europe	Romania	44.2925	25.0311	131	L0801_meta	10.1016/j.envint.2024.108917
637	SRR26545632	PRJNA1032917	SAMN38018676	SRX22247641	979.02 Mb	maize	Europe	Austria	48.2916	14.9749	538	L0007_meta	10.1016/j.envint.2024.108917
638	SRR26545633	PRJNA1032917	SAMN38019269	SRX22247640	1.10 Gb	wheat	Europe	Romania	44.9404	24.0702	298	L0800_meta	10.1016/j.envint.2024.108917
639	SRR26545637	PRJNA1032917	SAMN38019265	SRX22247636	842.74 Mb	wheat	Europe	Lithuania	55.7966	23.6878	103	L0793_meta	10.1016/j.envint.2024.108917
640	SRR26545639	PRJNA1032917	SAMN38019263	SRX22247634	1.11 Gb	others	Europe	Romania	47.1836	27.7951	34	L0791_meta	10.1016/j.envint.2024.108917
641	SRR26545643	PRJNA1032917	SAMN38018729	SRX22247630	962.86 Mb	others	Europe	Denmark	55.091	10.2974	32	L0061_meta	10.1016/j.envint.2024.108917
642	SRR26545644	PRJNA1032917	SAMN38019259	SRX22247629	880.60 Mb	wheat	Europe	France	49.9185	1.4713	89	L0786_meta	10.1016/j.envint.2024.108917
643	SRR26545645	PRJNA1032917	SAMN38019113	SRX22247628	1.01 Gb	others	Europe	Spain	41.5631	0.2374	340	L0560_meta	10.1016/j.envint.2024.108917
644	SRR26545646	PRJNA1032917	SAMN38019112	SRX22247627	1.06 Gb	wheat	Europe	Czech Republic	49.5919	12.808	495	L0559_meta	10.1016/j.envint.2024.108917
645	SRR26545647	PRJNA1032917	SAMN38019111	SRX22247626	1.05 Gb	maize	Europe	Austria	47.9867	16.3422	202	L0558_meta	10.1016/j.envint.2024.108917
646	SRR26545648	PRJNA1032917	SAMN38019110	SRX22247625	783.31 Mb	wheat	Europe	Finland	64.6846	25.492	45	L0557_meta	10.1016/j.envint.2024.108917
647	SRR26545651	PRJNA1032917	SAMN38019108	SRX22247622	694.08 Mb	wheat	Europe	France	47.9705	-2.9125	86	L0553_meta	10.1016/j.envint.2024.108917
648	SRR26545653	PRJNA1032917	SAMN38019106	SRX22247620	764.19 Mb	wheat	Europe	France	47.5003	4.3301	248	L0551_meta	10.1016/j.envint.2024.108917
649	SRR26545654	PRJNA1032917	SAMN38019105	SRX22247619	1.02 Gb	maize	Europe	France	44.976	5.9607	1099	L0550_meta	10.1016/j.envint.2024.108917
650	SRR26545656	PRJNA1032917	SAMN38019103	SRX22247617	939.04 Mb	maize	Europe	Spain	40.7531	-1.6862	1234	L0548_meta	10.1016/j.envint.2024.108917
651	SRR26545657	PRJNA1032917	SAMN38019102	SRX22247616	992.04 Mb	others	Europe	Spain	38.9402	-2.5925	1016	L0547_meta	10.1016/j.envint.2024.108917
652	SRR26545659	PRJNA1032917	SAMN38019100	SRX22247614	1.03 Gb	others	Europe	Spain	39.6301	-2.6328	846	L0545_meta	10.1016/j.envint.2024.108917
653	SRR26545661	PRJNA1032917	SAMN38019099	SRX22247612	686.21 Mb	others	Europe	Spain	39.9164	-4.7515	486	L0544_meta	10.1016/j.envint.2024.108917
654	SRR26545662	PRJNA1032917	SAMN38019098	SRX22247611	1.04 Gb	maize	Europe	France	45.706	-0.1278	42	L0543_meta	10.1016/j.envint.2024.108917
655	SRR26545664	PRJNA1032917	SAMN38019096	SRX22247609	989.60 Mb	wheat	Europe	Italy	44.6464	11.4973	8	L0541_meta	10.1016/j.envint.2024.108917
656	SRR26545665	PRJNA1032917	SAMN38019095	SRX22247608	958.43 Mb	wheat	Europe	Poland	53.1907	18.5349	86	L0539_meta	10.1016/j.envint.2024.108917
657	SRR26545667	PRJNA1032917	SAMN38019093	SRX22247606	982.61 Mb	wheat	Europe	Spain	36.2513	-6.016	66	L0535_meta	10.1016/j.envint.2024.108917
658	SRR26545668	PRJNA1032917	SAMN38019092	SRX22247605	999.27 Mb	others	Europe	Italy	40.3194	18.2483	40	L0534_meta	10.1016/j.envint.2024.108917
659	SRR26545669	PRJNA1032917	SAMN38019091	SRX22247604	789.75 Mb	others	Europe	Spain	42.3697	-5.5028	779	L0532_meta	10.1016/j.envint.2024.108917
660	SRR26545671	PRJNA1032917	SAMN38018712	SRX22247602	949.47 Mb	maize	Europe	Spain	41.4627	-0.5656	210	L0043_meta	10.1016/j.envint.2024.108917
661	SRR26545674	PRJNA1032917	SAMN38019087	SRX22247599	906.93 Mb	others	Europe	Greece	38.9605	22.8527	182	L0527_meta	10.1016/j.envint.2024.108917
662	SRR26545675	PRJNA1032917	SAMN38019086	SRX22247598	1.04 Gb	others	Europe	Spain	42.1001	-3.9798	793	L0526_meta	10.1016/j.envint.2024.108917
663	SRR26545676	PRJNA1032917	SAMN38019085	SRX22247597	881.36 Mb	others	Europe	Spain	42.3686	-4.908	864	L0525_meta	10.1016/j.envint.2024.108917
664	SRR26545677	PRJNA1032917	SAMN38018998	SRX22247596	620.54 Mb	wheat	Europe	Italy	37.3143	14.0872	158	L0398_meta	10.1016/j.envint.2024.108917
665	SRR26545678	PRJNA1032917	SAMN38018997	SRX22247595	628.03 Mb	wheat	Europe	Czech Republic	49.2312	17.2475	399	L0396_meta	10.1016/j.envint.2024.108917
666	SRR26545679	PRJNA1032917	SAMN38018996	SRX22247594	552.67 Mb	wheat	Europe	Czech Republic	48.842	16.5334	199	L0395_meta	10.1016/j.envint.2024.108917
667	SRR26545681	PRJNA1032917	SAMN38018994	SRX22247592	635.79 Mb	others	Europe	Spain	41.4663	-3.931	955	L0393_meta	10.1016/j.envint.2024.108917
668	SRR26545682	PRJNA1032917	SAMN38018993	SRX22247591	994.34 Mb	others	Europe	Spain	42.7196	-1.5526	493	L0392_meta	10.1016/j.envint.2024.108917
669	SRR26545683	PRJNA1032917	SAMN38018992	SRX22247590	1,020.37 Mb	wheat	Europe	Czech Republic	49.0159	16.9409	218	L0391_meta	10.1016/j.envint.2024.108917
670	SRR26545684	PRJNA1032917	SAMN38018991	SRX22247589	1,008.39 Mb	maize	Europe	France	46.5318	-1.1287	20	L0390_meta	10.1016/j.envint.2024.108917
671	SRR26545685	PRJNA1032917	SAMN38018990	SRX22247588	1,010.21 Mb	wheat	Europe	Italy	43.2417	13.009	368	L0385_meta	10.1016/j.envint.2024.108917
672	SRR26545687	PRJNA1032917	SAMN38018989	SRX22247586	963.60 Mb	maize	Europe	Spain	40.7673	-2.8856	1018	L0382_meta	10.1016/j.envint.2024.108917
673	SRR26545688	PRJNA1032917	SAMN38018988	SRX22247585	537.33 Mb	wheat	Europe	Poland	53.3856	23.6942	191	L0380_meta	10.1016/j.envint.2024.108917
674	SRR26545689	PRJNA1032917	SAMN38018987	SRX22247584	966.95 Mb	others	Europe	Spain	40.8253	-3.1376	732	L0378_meta	10.1016/j.envint.2024.108917
675	SRR26545690	PRJNA1032917	SAMN38018986	SRX22247583	1.07 Gb	others	Europe	Spain	40.774	-3.2468	766	L0370_meta	10.1016/j.envint.2024.108917
676	SRR26545693	PRJNA1032917	SAMN38018983	SRX22247580	832.86 Mb	fruit	Europe	Portugal	37.9551	-8.3036	65	L0367_meta	10.1016/j.envint.2024.108917
677	SRR26545694	PRJNA1032917	SAMN38018982	SRX22247579	834.95 Mb	others	Europe	Spain	41.4624	-5.3185	651	L0366_meta	10.1016/j.envint.2024.108917
678	SRR26545696	PRJNA1032917	SAMN38018980	SRX22247577	739.18 Mb	others	Europe	Finland	61.5307	29.566	64	L0363_meta	10.1016/j.envint.2024.108917
679	SRR26545698	PRJNA1032917	SAMN38018979	SRX22247575	952.33 Mb	others	Europe	Spain	42.7218	-2.8875	540	L0362_meta	10.1016/j.envint.2024.108917
680	SRR26545699	PRJNA1032917	SAMN38018978	SRX22247574	744.33 Mb	others	Europe	Italy	42.3678	11.7546	121	L0361_meta	10.1016/j.envint.2024.108917
681	SRR26545701	PRJNA1032917	SAMN38018976	SRX22247572	1,019.84 Mb	maize	Europe	France	43.3288	2.6457	180	L0358_meta	10.1016/j.envint.2024.108917
682	SRR26545707	PRJNA1032917	SAMN38018970	SRX22247566	854.46 Mb	others	Europe	France	43.7958	5.7954	287	L0350_meta	10.1016/j.envint.2024.108917
683	SRR26545709	PRJNA1032917	SAMN38018882	SRX22247564	899.00 Mb	wheat	Europe	Netherlands	52.6992	6.9963	17	L0235_meta	10.1016/j.envint.2024.108917
684	SRR26545710	PRJNA1032917	SAMN38018881	SRX22247563	866.64 Mb	wheat	Europe	Lithuania	56.0942	22.9416	105	L0233_meta	10.1016/j.envint.2024.108917
685	SRR26545711	PRJNA1032917	SAMN38018880	SRX22247562	869.11 Mb	wheat	Europe	Estonia	58.341	25.5008	75	L0232_meta	10.1016/j.envint.2024.108917
686	SRR26545714	PRJNA1032917	SAMN38018878	SRX22247559	970.60 Mb	maize	Europe	France	45.9153	-0.4015	54	L0229_meta	10.1016/j.envint.2024.108917
687	SRR26545715	PRJNA1032917	SAMN38018877	SRX22247558	967.63 Mb	others	Europe	Spain	39.7209	-3.0514	739	L0228_meta	10.1016/j.envint.2024.108917
688	SRR26545716	PRJNA1032917	SAMN38018876	SRX22247557	934.22 Mb	others	Europe	United Kingdom	55.6867	-2.6445	221	L0227_meta	10.1016/j.envint.2024.108917
689	SRR26545719	PRJNA1032917	SAMN38018873	SRX22247554	793.72 Mb	others	Europe	Poland	51.1836	19.6865	224	L0224_meta	10.1016/j.envint.2024.108917
690	SRR26545722	PRJNA1032917	SAMN38018870	SRX22247551	823.48 Mb	maize	Europe	France	43.3163	0.5174	291	L0221_meta	10.1016/j.envint.2024.108917
691	SRR26545723	PRJNA1032917	SAMN38018690	SRX22247550	905.13 Mb	others	Europe	Denmark	55.3417	9.4486	26	L0021_meta	10.1016/j.envint.2024.108917
692	SRR26545724	PRJNA1032917	SAMN38018672	SRX22247549	875.47 Mb	maize	Europe	Spain	42.116	-0.9237	462	L0003_meta	10.1016/j.envint.2024.108917
693	SRR26545729	PRJNA1032917	SAMN38018865	SRX22247544	1.03 Gb	others	Europe	France	46.9293	1.8869	159	L0216_meta	10.1016/j.envint.2024.108917
694	SRR26545730	PRJNA1032917	SAMN38018864	SRX22247543	1.15 Gb	maize	Europe	France	43.5392	3.3384	136	L0215_meta	10.1016/j.envint.2024.108917
695	SRR26545733	PRJNA1032917	SAMN38018861	SRX22247540	1.21 Gb	others	Europe	France	47.1049	1.3566	158	L0212_meta	10.1016/j.envint.2024.108917
696	SRR26545737	PRJNA1032917	SAMN38018858	SRX22247536	1.15 Gb	wheat	Europe	Latvia	56.9432	27.5194	114	L0208_meta	10.1016/j.envint.2024.108917
697	SRR26545739	PRJNA1032917	SAMN38018856	SRX22247534	1.34 Gb	wheat	Europe	Latvia	57.0316	26.5746	116	L0205_meta	10.1016/j.envint.2024.108917
698	SRR26545740	PRJNA1032917	SAMN38018855	SRX22247533	1.40 Gb	wheat	Europe	Austria	48.1074	14.2035	324	L0204_meta	10.1016/j.envint.2024.108917
699	SRR26545742	PRJNA1032917	SAMN38019228	SRX22247531	1.05 Gb	others	Europe	Poland	52.9713	14.6327	56	L0736_meta	10.1016/j.envint.2024.108917
700	SRR26545745	PRJNA1032917	SAMN38019225	SRX22247528	1.13 Gb	wheat	Europe	Bulgaria	43.1478	25.3338	275	L0733_meta	10.1016/j.envint.2024.108917
701	SRR26545746	PRJNA1032917	SAMN38019224	SRX22247527	1.02 Gb	wheat	Europe	Bulgaria	43.5588	24.5345	120	L0731_meta	10.1016/j.envint.2024.108917
702	SRR26545747	PRJNA1032917	SAMN38019223	SRX22247526	1.07 Gb	others	Europe	Poland	53.2475	14.9327	23	L0730_meta	10.1016/j.envint.2024.108917
703	SRR26545749	PRJNA1032917	SAMN38019221	SRX22247524	1.01 Gb	others	Europe	Sweden	58.4069	15.2139	85	L0727_meta	10.1016/j.envint.2024.108917
704	SRR26545751	PRJNA1032917	SAMN38018725	SRX22247522	895.47 Mb	others	Europe	Italy	40.4739	16.4279	343	L0057_meta	10.1016/j.envint.2024.108917
705	SRR26545752	PRJNA1032917	SAMN38019219	SRX22247521	806.17 Mb	wheat	Europe	Bulgaria	43.4245	27.6877	311	L0725_meta	10.1016/j.envint.2024.108917
706	SRR26545753	PRJNA1032917	SAMN38019218	SRX22247520	919.11 Mb	wheat	Europe	Bulgaria	41.4244	23.169	106	L0723_meta	10.1016/j.envint.2024.108917
707	SRR26545755	PRJNA1032917	SAMN38019216	SRX22247518	908.41 Mb	wheat	Europe	Lithuania	55.2889	22.6135	47	L0721_meta	10.1016/j.envint.2024.108917
708	SRR26545756	PRJNA1032917	SAMN38019215	SRX22247517	793.40 Mb	others	Europe	Poland	52.2317	19.2644	112	L0719_meta	10.1016/j.envint.2024.108917
709	SRR26545757	PRJNA1032917	SAMN38019214	SRX22247516	926.11 Mb	vegetable	Europe	United Kingdom	54.0073	-0.581	75	L0718_meta	10.1016/j.envint.2024.108917
710	SRR26545760	PRJNA1032917	SAMN38019211	SRX22247513	855.31 Mb	maize	Europe	Spain	41.7562	0.3513	225	L0715_meta	10.1016/j.envint.2024.108917
711	SRR26545761	PRJNA1032917	SAMN38019210	SRX22247512	1.08 Gb	wheat	Europe	France	50.1038	2.5639	144	L0713_meta	10.1016/j.envint.2024.108917
712	SRR26545762	PRJNA1032917	SAMN38018724	SRX22247511	874.55 Mb	wheat	Europe	France	47.9382	0.9175	194	L0056_meta	10.1016/j.envint.2024.108917
713	SRR26545765	PRJNA1032917	SAMN38019207	SRX22247508	890.09 Mb	wheat	Europe	Bulgaria	43.7069	26.4496	238	L0708_meta	10.1016/j.envint.2024.108917
714	SRR26545766	PRJNA1032917	SAMN38019206	SRX22247507	851.48 Mb	others	Europe	Spain	41.4166	-4.4057	866	L0707_meta	10.1016/j.envint.2024.108917
715	SRR26545768	PRJNA1032917	SAMN38019204	SRX22247505	665.08 Mb	vegetable	Europe	United Kingdom	54.0159	-1.2942	20	L0704_meta	10.1016/j.envint.2024.108917
716	SRR26545769	PRJNA1032917	SAMN38019203	SRX22247504	987.29 Mb	wheat	Europe	France	48.0032	0.8249	111	L0703_meta	10.1016/j.envint.2024.108917
717	SRR26545772	PRJNA1032917	SAMN38019200	SRX22247501	947.76 Mb	maize	Europe	Bulgaria	44.0329	27.3655	70	L0700_meta	10.1016/j.envint.2024.108917
718	SRR26545773	PRJNA1032917	SAMN38018854	SRX22247500	810.75 Mb	maize	Europe	Poland	52.9197	16.1782	48	L0203_meta	10.1016/j.envint.2024.108917
719	SRR26545775	PRJNA1032917	SAMN38018852	SRX22247498	1.16 Gb	others	Europe	France	44.044	4.2047	166	L0201_meta	10.1016/j.envint.2024.108917
720	SRR26545779	PRJNA1032917	SAMN38018849	SRX22247494	882.20 Mb	others	Europe	Spain	42.2891	-4.1967	821	L0198_meta	10.1016/j.envint.2024.108917
721	SRR26545783	PRJNA1032917	SAMN38018845	SRX22247490	965.99 Mb	others	Europe	Poland	52.9248	14.896	69	L0191_meta	10.1016/j.envint.2024.108917
722	SRR26545789	PRJNA1032917	SAMN38018687	SRX22247484	997.64 Mb	others	Europe	Spain	41.5078	-1.1528	494	L0018_meta	10.1016/j.envint.2024.108917
723	SRR26545790	PRJNA1032917	SAMN38018839	SRX22247483	961.39 Mb	others	Europe	Spain	40.5733	-1.0337	1087	L0184_meta	10.1016/j.envint.2024.108917
724	SRR26545792	PRJNA1032917	SAMN38018837	SRX22247481	785.72 Mb	others	Europe	Spain	37.9066	-3.707	337	L0181_meta	10.1016/j.envint.2024.108917
725	SRR26545795	PRJNA1032917	SAMN38018834	SRX22247478	1.08 Gb	others	Europe	Spain	41.0274	-1.2101	1074	L0178_meta	10.1016/j.envint.2024.108917
726	SRR26545796	PRJNA1032917	SAMN38018833	SRX22247477	978.38 Mb	wheat	Europe	Austria	48.6677	16.4286	202	L0177_meta	10.1016/j.envint.2024.108917
727	SRR26545797	PRJNA1032917	SAMN38018832	SRX22247476	709.80 Mb	wheat	Europe	Denmark	57.0325	9.7861	6	L0176_meta	10.1016/j.envint.2024.108917
728	SRR26545798	PRJNA1032917	SAMN38018831	SRX22247475	808.03 Mb	others	Europe	Spain	41.7747	-4.7115	781	L0175_meta	10.1016/j.envint.2024.108917
729	SRR26545800	PRJNA1032917	SAMN38018686	SRX22247473	590.95 Mb	wheat	Europe	Latvia	56.5975	23.545	7	L0017_meta	10.1016/j.envint.2024.108917
730	SRR26545802	PRJNA1032917	SAMN38018828	SRX22247471	847.60 Mb	wheat	Europe	Germany	49.2623	8.9698	295	L0172_meta	10.1016/j.envint.2024.108917
731	SRR26545803	PRJNA1032917	SAMN38018827	SRX22247470	991.89 Mb	wheat	Europe	Germany	53.4375	9.7141	37	L0171_meta	10.1016/j.envint.2024.108917
732	SRR26545806	PRJNA1032917	SAMN38018824	SRX22247467	992.84 Mb	maize	Europe	Hungary	47.6508	19.8906	104	L0168_meta	10.1016/j.envint.2024.108917
733	SRR26545807	PRJNA1032917	SAMN38018823	SRX22247466	626.49 Mb	wheat	Europe	Denmark	56.8342	9.5908	33	L0167_meta	10.1016/j.envint.2024.108917
734	SRR26545808	PRJNA1032917	SAMN38018822	SRX22247465	1.01 Gb	others	Europe	Sweden	56.0433	13.0636	71	L0166_meta	10.1016/j.envint.2024.108917
735	SRR26545809	PRJNA1032917	SAMN38018821	SRX22247464	982.93 Mb	maize	Europe	Spain	41.7622	-2.244	1109	L0165_meta	10.1016/j.envint.2024.108917
736	SRR26545810	PRJNA1032917	SAMN38018820	SRX22247463	1,004.60 Mb	wheat	Europe	Germany	48.4934	9.9594	598	L0164_meta	10.1016/j.envint.2024.108917
737	SRR26545812	PRJNA1032917	SAMN38018819	SRX22247461	833.01 Mb	wheat	Europe	Germany	49.3389	9.9312	468	L0163_meta	10.1016/j.envint.2024.108917
738	SRR26545815	PRJNA1032917	SAMN38018816	SRX22247458	957.35 Mb	wheat	Europe	Germany	50.4193	8.0441	129	L0158_meta	10.1016/j.envint.2024.108917
739	SRR26545817	PRJNA1032917	SAMN38018814	SRX22247456	1.04 Gb	others	Europe	Spain	41.6404	-4.8743	843	L0156_meta	10.1016/j.envint.2024.108917
740	SRR26545818	PRJNA1032917	SAMN38018813	SRX22247455	1.01 Gb	maize	Europe	France	43.8858	-0.3538	83	L0155_meta	10.1016/j.envint.2024.108917
741	SRR26545821	PRJNA1032917	SAMN38018810	SRX22247452	1.13 Gb	wheat	Europe	Poland	51.074	21.6569	188	L0151_meta	10.1016/j.envint.2024.108917
742	SRR26545824	PRJNA1032917	SAMN38018808	SRX22247449	962.45 Mb	others	Europe	Denmark	56.3838	10.6632	14	L0149_meta	10.1016/j.envint.2024.108917
743	SRR26545825	PRJNA1032917	SAMN38018807	SRX22247448	698.51 Mb	maize	Europe	Hungary	47.3436	21.8667	114	L0148_meta	10.1016/j.envint.2024.108917
744	SRR26545827	PRJNA1032917	SAMN38018805	SRX22247446	785.14 Mb	others	Europe	Spain	41.6679	-4.4411	786	L0145_meta	10.1016/j.envint.2024.108917
745	SRR26545835	PRJNA1032917	SAMN38018798	SRX22247438	1,000.35 Mb	maize	Europe	France	43.3954	3.0827	116.2	L0138_meta	10.1016/j.envint.2024.108917
746	SRR26545836	PRJNA1032917	SAMN38018797	SRX22247437	1.02 Gb	wheat	Europe	Germany	54.3327	10.9682	12	L0137_meta	10.1016/j.envint.2024.108917
747	SRR26545837	PRJNA1032917	SAMN38018796	SRX22247436	858.66 Mb	maize	Europe	Spain	40.6361	-1.2829	1039	L0136_meta	10.1016/j.envint.2024.108917
748	SRR26545839	PRJNA1032917	SAMN38018794	SRX22247434	919.43 Mb	wheat	Europe	Germany	49.8935	7.8149	205	L0133_meta	10.1016/j.envint.2024.108917
749	SRR26545842	PRJNA1032917	SAMN38018791	SRX22247431	1.04 Gb	wheat	Europe	Latvia	56.699	23.4483	4	L0130_meta	10.1016/j.envint.2024.108917
750	SRR26545843	PRJNA1032917	SAMN38018790	SRX22247430	955.27 Mb	wheat	Europe	Lithuania	55.4005	25.0678	100	L0129_meta	10.1016/j.envint.2024.108917
751	SRR26545848	PRJNA1032917	SAMN38018786	SRX22247425	1.09 Gb	wheat	Europe	Spain	37.8331	-4.5657	258	L0124_meta	10.1016/j.envint.2024.108917
752	SRR26545854	PRJNA1032917	SAMN38018780	SRX22247419	1.13 Gb	others	Europe	Spain	41.8075	-3.4476	954	L0118_meta	10.1016/j.envint.2024.108917
753	SRR26545855	PRJNA1032917	SAMN38018681	SRX22247418	1.09 Gb	others	Europe	Spain	41.4809	0.5153	159	L0012_meta	10.1016/j.envint.2024.108917
754	SRR26545856	PRJNA1032917	SAMN38018779	SRX22247417	1.09 Gb	others	Europe	Spain	42.3945	-3.7034	867	L0117_meta	10.1016/j.envint.2024.108917
755	SRR26545861	PRJNA1032917	SAMN38018774	SRX22247412	880.02 Mb	fruit	Europe	Spain	39.5226	-0.643	190	L0112_meta	10.1016/j.envint.2024.108917
756	SRR26545863	PRJNA1032917	SAMN38018772	SRX22247410	987.51 Mb	others	Europe	Spain	42.502	-3.852	972	L0110_meta	10.1016/j.envint.2024.108917
757	SRR26545865	PRJNA1032917	SAMN38018770	SRX22247408	981.67 Mb	others	Europe	Spain	42.4876	-3.8239	956	L0108_meta	10.1016/j.envint.2024.108917
758	SRR26545866	PRJNA1032917	SAMN38018680	SRX22247407	1.18 Gb	maize	Europe	Spain	41.7174	-1.07	220	L0011_meta	10.1016/j.envint.2024.108917
759	SRR26545869	PRJNA1032917	SAMN38019251	SRX22248023	942.67 Mb	wheat	Europe	Romania	44.6865	23.646	190	L0776_meta	10.1016/j.envint.2024.108917
760	SRR26545871	PRJNA1032917	SAMN38018728	SRX22248021	896.44 Mb	wheat	Europe	Spain	37.3564	-4.0755	1043	L0060_meta	10.1016/j.envint.2024.108917
761	SRR26545872	PRJNA1032917	SAMN38019249	SRX22248020	860.00 Mb	maize	Europe	Romania	45.9029	23.2721	204	L0770_meta	10.1016/j.envint.2024.108917
762	SRR26545874	PRJNA1032917	SAMN38019247	SRX22248018	830.41 Mb	maize	Europe	Romania	44.1747	23.6488	148	L0768_meta	10.1016/j.envint.2024.108917
763	SRR26545877	PRJNA1032917	SAMN38019244	SRX22248015	829.99 Mb	wheat	Europe	France	47.9563	0.6984	165	L0764_meta	10.1016/j.envint.2024.108917
764	SRR26545878	PRJNA1032917	SAMN38019243	SRX22248014	844.91 Mb	wheat	Europe	Lithuania	55.2291	23.3631	85	L0762_meta	10.1016/j.envint.2024.108917
765	SRR26545881	PRJNA1032917	SAMN38019240	SRX22248011	813.96 Mb	wheat	Europe	Romania	45.8382	21.6623	145	L0755_meta	10.1016/j.envint.2024.108917
766	SRR26545882	PRJNA1032917	SAMN38018727	SRX22248010	934.92 Mb	maize	Europe	France	43.3954	3.0827	116.1	L0059_meta	10.1016/j.envint.2024.108917
767	SRR26545884	PRJNA1032917	SAMN38019238	SRX22248008	963.60 Mb	maize	Europe	Romania	46.3002	23.8739	332	L0752_meta	10.1016/j.envint.2024.108917
768	SRR26545886	PRJNA1032917	SAMN38019236	SRX22248006	921.52 Mb	others	Europe	Bulgaria	43.3713	23.5079	233	L0750_meta	10.1016/j.envint.2024.108917
769	SRR26545888	PRJNA1032917	SAMN38019234	SRX22248004	1.14 Gb	wheat	Europe	Latvia	57.4242	26.9595	189	L0745_meta	10.1016/j.envint.2024.108917
770	SRR26545889	PRJNA1032917	SAMN38019233	SRX22248003	782.09 Mb	others	Europe	Spain	41.2592	1.2682	193	L0744_meta	10.1016/j.envint.2024.108917
771	SRR26545890	PRJNA1032917	SAMN38019232	SRX22248002	904.23 Mb	others	Europe	Spain	41.4944	0.6576	246	L0741_meta	10.1016/j.envint.2024.108917
772	SRR26545891	PRJNA1032917	SAMN38019231	SRX22248001	873.43 Mb	wheat	Europe	Poland	49.6408	21.9796	281	L0740_meta	10.1016/j.envint.2024.108917
773	SRR26545894	PRJNA1032917	SAMN38019170	SRX22247998	936.70 Mb	wheat	Europe	France	48.2616	-3.3711	223	L0648_meta	10.1016/j.envint.2024.108917
774	SRR26545896	PRJNA1032917	SAMN38018675	SRX22247996	1.02 Gb	wheat	Europe	Germany	52.6909	11.553	37	L0006_meta	10.1016/j.envint.2024.108917
775	SRR26545898	PRJNA1032917	SAMN38019168	SRX22247994	893.53 Mb	others	Europe	Poland	52.3117	17.3598	98	L0646_meta	10.1016/j.envint.2024.108917
776	SRR26545899	PRJNA1032917	SAMN38019167	SRX22247993	1.01 Gb	others	Europe	Spain	42.3223	-5.6886	800	L0645_meta	10.1016/j.envint.2024.108917
777	SRR26545900	PRJNA1032917	SAMN38019166	SRX22247992	906.31 Mb	wheat	Europe	Bulgaria	43.092	23.8173	431	L0644_meta	10.1016/j.envint.2024.108917
778	SRR26545901	PRJNA1032917	SAMN38019165	SRX22247991	1.16 Gb	wheat	Europe	France	49.1393	1.6905	122	L0643_meta	10.1016/j.envint.2024.108917
779	SRR26545902	PRJNA1032917	SAMN38019164	SRX22247990	1.00 Gb	maize	Europe	France	48.926	1.039	154	L0642_meta	10.1016/j.envint.2024.108917
780	SRR26545903	PRJNA1032917	SAMN38019163	SRX22247989	1.08 Gb	others	Europe	Spain	39.1192	-3.8195	616	L0641_meta	10.1016/j.envint.2024.108917
781	SRR26545904	PRJNA1032917	SAMN38019162	SRX22247988	1.01 Gb	wheat	Europe	France	48.0238	7.1183	644	L0640_meta	10.1016/j.envint.2024.108917
782	SRR26545905	PRJNA1032917	SAMN38019161	SRX22247987	1.07 Gb	maize	Europe	France	47.0125	4.673	526	L0639_meta	10.1016/j.envint.2024.108917
783	SRR26545906	PRJNA1032917	SAMN38019160	SRX22247986	918.19 Mb	wheat	Europe	Belgium	50.5856	5.153	170	L0638_meta	10.1016/j.envint.2024.108917
784	SRR26545909	PRJNA1032917	SAMN38019158	SRX22247983	898.23 Mb	wheat	Europe	Sweden	59.3214	15.3509	28	L0632_meta	10.1016/j.envint.2024.108917
785	SRR26545911	PRJNA1032917	SAMN38019156	SRX22247981	866.88 Mb	others	Europe	Poland	51.1183	19.817	227	L0629_meta	10.1016/j.envint.2024.108917
786	SRR26545912	PRJNA1032917	SAMN38019155	SRX22247980	1.01 Gb	wheat	Europe	France	48.661	-4.1165	45	L0626_meta	10.1016/j.envint.2024.108917
787	SRR26545914	PRJNA1032917	SAMN38019153	SRX22247978	933.44 Mb	fruit	Europe	Portugal	41.248	-7.4859	563	L0622_meta	10.1016/j.envint.2024.108917
788	SRR26545915	PRJNA1032917	SAMN38019152	SRX22247977	830.17 Mb	others	Europe	Poland	52.0335	18.2827	116	L0619_meta	10.1016/j.envint.2024.108917
789	SRR26545916	PRJNA1032917	SAMN38019151	SRX22247976	617.18 Mb	others	Europe	Poland	51.3678	18.9719	166	L0618_meta	10.1016/j.envint.2024.108917
790	SRR26545917	PRJNA1032917	SAMN38019150	SRX22247975	1.07 Gb	others	Europe	France	47.4228	4.5778	501	L0617_meta	10.1016/j.envint.2024.108917
791	SRR26545918	PRJNA1032917	SAMN38018718	SRX22247974	1.03 Gb	others	Europe	Spain	37.9841	-3.93	294	L0049_meta	10.1016/j.envint.2024.108917
792	SRR26545919	PRJNA1032917	SAMN38019149	SRX22247973	1.04 Gb	others	Europe	Poland	51.746	18.2589	125	L0616_meta	10.1016/j.envint.2024.108917
793	SRR26545920	PRJNA1032917	SAMN38019148	SRX22247972	1.09 Gb	wheat	Europe	France	50.8205	2.478	37	L0615_meta	10.1016/j.envint.2024.108917
794	SRR26545922	PRJNA1032917	SAMN38019146	SRX22247970	1.15 Gb	others	Europe	Spain	37.8531	-3.6961	471	L0612_meta	10.1016/j.envint.2024.108917
795	SRR26545923	PRJNA1032917	SAMN38019145	SRX22247969	1.11 Gb	wheat	Europe	Spain	37.8374	-4.1755	300	L0610_meta	10.1016/j.envint.2024.108917
796	SRR26545925	PRJNA1032917	SAMN38019143	SRX22247967	1.20 Gb	others	Europe	France	48.7296	4.3818	183	L0608_meta	10.1016/j.envint.2024.108917
797	SRR26545926	PRJNA1032917	SAMN38019027	SRX22247966	1.24 Gb	wheat	Europe	Spain	42.8247	-1.7463	411	L0440_meta	10.1016/j.envint.2024.108917
798	SRR26545927	PRJNA1032917	SAMN38019026	SRX22247965	896.67 Mb	others	Europe	Spain	41.7868	-5.4747	707	L0439_meta	10.1016/j.envint.2024.108917
799	SRR26545928	PRJNA1032917	SAMN38019025	SRX22247964	861.25 Mb	wheat	Europe	Czech Republic	49.8789	14.9427	393	L0436_meta	10.1016/j.envint.2024.108917
800	SRR26545929	PRJNA1032917	SAMN38019024	SRX22247963	950.50 Mb	others	Europe	France	47.4848	4.0391	301	L0435_meta	10.1016/j.envint.2024.108917
801	SRR26545930	PRJNA1032917	SAMN38019023	SRX22247962	1.16 Gb	wheat	Europe	Spain	36.7683	-6.2263	32	L0434_meta	10.1016/j.envint.2024.108917
802	SRR26545933	PRJNA1032917	SAMN38019020	SRX22247959	1.25 Gb	wheat	Europe	Germany	50.6544	6.5625	291	L0428_meta	10.1016/j.envint.2024.108917
803	SRR26545934	PRJNA1032917	SAMN38018705	SRX22247958	811.84 Mb	wheat	Europe	Italy	42.8072	11.3774	261	L0036_meta	10.1016/j.envint.2024.108917
804	SRR26545935	PRJNA1032917	SAMN38019019	SRX22247957	1.21 Gb	wheat	Europe	France	48.2359	-2.1868	91	L0427_meta	10.1016/j.envint.2024.108917
805	SRR26545939	PRJNA1032917	SAMN38019015	SRX22247953	5.47 Gb	vegetable	Europe	Finland	61.3272	21.9958	21	L0423_meta	10.1016/j.envint.2024.108917
806	SRR26545940	PRJNA1032917	SAMN38019014	SRX22247952	1.24 Gb	wheat	Europe	France	49.2149	6.032	282	L0418_meta	10.1016/j.envint.2024.108917
807	SRR26545943	PRJNA1032917	SAMN38019011	SRX22247949	1.15 Gb	maize	Europe	France	48.9967	7.9641	161	L0414_meta	10.1016/j.envint.2024.108917
808	SRR26545944	PRJNA1032917	SAMN38019010	SRX22247948	924.19 Mb	maize	Europe	Spain	42.0222	-4.8953	757	L0413_meta	10.1016/j.envint.2024.108917
809	SRR26545947	PRJNA1032917	SAMN38019008	SRX22247945	1.08 Gb	others	Europe	France	48.4316	4.1984	151	L0410_meta	10.1016/j.envint.2024.108917
810	SRR26545950	PRJNA1032917	SAMN38019005	SRX22247942	982.71 Mb	wheat	Europe	France	50.0527	3.1895	94	L0406_meta	10.1016/j.envint.2024.108917
811	SRR26545952	PRJNA1032917	SAMN38019003	SRX22247940	1.20 Gb	others	Europe	France	49.0878	1.9751	69	L0404_meta	10.1016/j.envint.2024.108917
812	SRR26545953	PRJNA1032917	SAMN38019002	SRX22247939	859.60 Mb	others	Europe	Spain	41.4418	-2.6154	952	L0403_meta	10.1016/j.envint.2024.108917
813	SRR26545954	PRJNA1032917	SAMN38019001	SRX22247938	894.74 Mb	maize	Europe	Spain	41.0389	-4.9704	806	L0402_meta	10.1016/j.envint.2024.108917
814	SRR26545957	PRJNA1032917	SAMN38018999	SRX22247935	6.36 Gb	wheat	Europe	France	48.3927	7.4754	179	L0399_meta	10.1016/j.envint.2024.108917
815	SRR26545960	PRJNA1032917	SAMN38018939	SRX22247932	1.04 Gb	maize	Europe	France	45.7926	5.2054	192	L0314_meta	10.1016/j.envint.2024.108917
816	SRR26545962	PRJNA1032917	SAMN38018937	SRX22247930	882.32 Mb	wheat	Europe	Italy	37.2284	13.9701	269	L0312_meta	10.1016/j.envint.2024.108917
817	SRR26545963	PRJNA1032917	SAMN38018936	SRX22247929	1.03 Gb	others	Europe	Spain	40.8061	-0.9076	1230	L0311_meta	10.1016/j.envint.2024.108917
818	SRR26545964	PRJNA1032917	SAMN38018935	SRX22247928	805.67 Mb	maize	Europe	Italy	45.0411	8.3654	212	L0310_meta	10.1016/j.envint.2024.108917
819	SRR26545967	PRJNA1032917	SAMN38018932	SRX22247925	882.22 Mb	wheat	Europe	Spain	37.3034	-4.544	448	L0306_meta	10.1016/j.envint.2024.108917
820	SRR26545969	PRJNA1032917	SAMN38018930	SRX22247923	7.45 Gb	wheat	Europe	Germany	52.5288	8.4232	36	L0303_meta	10.1016/j.envint.2024.108917
821	SRR26545972	PRJNA1032917	SAMN38018928	SRX22247920	761.62 Mb	others	Europe	Spain	42.0505	-5.6663	754	L0300_meta	10.1016/j.envint.2024.108917
822	SRR26545973	PRJNA1032917	SAMN38018927	SRX22247919	762.46 Mb	wheat	Europe	Poland	51.0478	17.9031	174	L0299_meta	10.1016/j.envint.2024.108917
823	SRR26545975	PRJNA1032917	SAMN38018925	SRX22247917	916.51 Mb	vegetable	Europe	Finland	60.6179	22.1791	38	L0296_meta	10.1016/j.envint.2024.108917
824	SRR26545977	PRJNA1032917	SAMN38018923	SRX22247915	965.81 Mb	wheat	Europe	Latvia	56.4681	25.7916	81	L0294_meta	10.1016/j.envint.2024.108917
825	SRR26545978	PRJNA1032917	SAMN38018922	SRX22247914	856.13 Mb	others	Europe	Estonia	59.4293	26.7229	61	L0293_meta	10.1016/j.envint.2024.108917
826	SRR26545980	PRJNA1032917	SAMN38018920	SRX22247912	870.86 Mb	vegetable	Europe	Finland	60.8775	25.6961	87	L0290_meta	10.1016/j.envint.2024.108917
827	SRR26545981	PRJNA1032917	SAMN38018695	SRX22247911	989.68 Mb	others	Europe	Greece	40.031	22.2151	622	L0026_meta	10.1016/j.envint.2024.108917
828	SRR26545983	PRJNA1032917	SAMN38018918	SRX22247909	931.13 Mb	others	Europe	Finland	60.4353	24.85	48	L0288_meta	10.1016/j.envint.2024.108917
829	SRR26545985	PRJNA1032917	SAMN38018916	SRX22247907	995.26 Mb	others	Europe	Spain	41.2726	0.6192	305	L0284_meta	10.1016/j.envint.2024.108917
830	SRR26545989	PRJNA1032917	SAMN38018912	SRX22247903	905.35 Mb	wheat	Europe	Germany	53.0016	8.9126	4	L0278_meta	10.1016/j.envint.2024.108917
831	SRR26545990	PRJNA1032917	SAMN38018723	SRX22247902	869.12 Mb	others	Europe	Spain	42.3868	-4.0226	866	L0055_meta	10.1016/j.envint.2024.108917
832	SRR26545991	PRJNA1032917	SAMN38019199	SRX22247901	858.89 Mb	wheat	Europe	France	47.9819	-2.0165	122	L0699_meta	10.1016/j.envint.2024.108917
833	SRR26545992	PRJNA1032917	SAMN38019198	SRX22247900	1.07 Gb	others	Europe	Spain	39.4361	-3.3932	662	L0698_meta	10.1016/j.envint.2024.108917
834	SRR26545993	PRJNA1032917	SAMN38019197	SRX22247899	895.83 Mb	others	Europe	Poland	52.4677	19.2548	110	L0697_meta	10.1016/j.envint.2024.108917
835	SRR26545994	PRJNA1032917	SAMN38019196	SRX22247898	911.21 Mb	wheat	Europe	Bulgaria	43.6648	24.5615	31	L0695_meta	10.1016/j.envint.2024.108917
836	SRR26545995	PRJNA1032917	SAMN38019195	SRX22247897	918.11 Mb	others	Europe	Poland	52.3029	19.2794	124	L0694_meta	10.1016/j.envint.2024.108917
837	SRR26545996	PRJNA1032917	SAMN38019194	SRX22247896	1.02 Gb	others	Europe	Spain	38.8692	-3.2539	710	L0693_meta	10.1016/j.envint.2024.108917
838	SRR26545998	PRJNA1032917	SAMN38019192	SRX22247894	892.25 Mb	wheat	Europe	Bulgaria	43.474	24.9919	43	L0691_meta	10.1016/j.envint.2024.108917
839	SRR26545999	PRJNA1032917	SAMN38019191	SRX22247893	1,011.14 Mb	wheat	Europe	France	46.5042	0.6665	126	L0690_meta	10.1016/j.envint.2024.108917
840	SRR26546000	PRJNA1032917	SAMN38019190	SRX22247892	1.02 Gb	others	Europe	Bulgaria	43.5497	23.1225	197	L0689_meta	10.1016/j.envint.2024.108917
841	SRR26546002	PRJNA1032917	SAMN38019189	SRX22247890	981.98 Mb	wheat	Europe	Spain	37.8996	-4.0045	362	L0684_meta	10.1016/j.envint.2024.108917
842	SRR26546003	PRJNA1032917	SAMN38019188	SRX22247889	956.30 Mb	maize	Europe	Spain	41.9654	0.0756	311	L0682_meta	10.1016/j.envint.2024.108917
843	SRR26546004	PRJNA1032917	SAMN38019187	SRX22247888	864.55 Mb	others	Europe	Spain	38.7795	-3.6315	656	L0679_meta	10.1016/j.envint.2024.108917
844	SRR26546006	PRJNA1032917	SAMN38019185	SRX22247886	1.11 Gb	wheat	Europe	France	49.1468	0.8603	142	L0675_meta	10.1016/j.envint.2024.108917
845	SRR26546007	PRJNA1032917	SAMN38019184	SRX22247885	928.01 Mb	wheat	Europe	France	48.362	-4.169	85	L0673_meta	10.1016/j.envint.2024.108917
846	SRR26546012	PRJNA1032917	SAMN38018721	SRX22247880	1.03 Gb	wheat	Europe	Spain	37.5143	-5.3	157	L0053_meta	10.1016/j.envint.2024.108917
847	SRR26546015	PRJNA1032917	SAMN38019177	SRX22247877	1.00 Gb	maize	Europe	France	49.011	2.4276	83	L0663_meta	10.1016/j.envint.2024.108917
848	SRR26546018	PRJNA1032917	SAMN38019174	SRX22247874	1.01 Gb	maize	Europe	France	43.2404	2.1875	122	L0658_meta	10.1016/j.envint.2024.108917
849	SRR26546019	PRJNA1032917	SAMN38019173	SRX22247873	959.29 Mb	others	Europe	Belgium	50.5067	4.5957	146	L0656_meta	10.1016/j.envint.2024.108917
850	SRR26546021	PRJNA1032917	SAMN38019171	SRX22247871	914.52 Mb	wheat	Europe	Greece	37.1622	21.6078	107	L0654_meta	10.1016/j.envint.2024.108917
851	SRR26546022	PRJNA1032917	SAMN38019142	SRX22247870	744.21 Mb	others	Europe	Poland	51.7174	18.8954	146	L0606_meta	10.1016/j.envint.2024.108917
852	SRR26546023	PRJNA1032917	SAMN38019141	SRX22247869	961.57 Mb	wheat	Europe	France	47.8685	-2.6955	141	L0604_meta	10.1016/j.envint.2024.108917
853	SRR26546024	PRJNA1032917	SAMN38019140	SRX22247868	958.87 Mb	wheat	Europe	Czech Republic	50.2639	14.786	203	L0603_meta	10.1016/j.envint.2024.108917
854	SRR26546028	PRJNA1032917	SAMN38019137	SRX22247864	1.09 Gb	fruit	Europe	Italy	45.0519	9.379	90	L0600_meta	10.1016/j.envint.2024.108917
855	SRR26546029	PRJNA1032917	SAMN38019136	SRX22247863	1.00 Gb	wheat	Europe	France	47.9086	2.969	184	L0599_meta	10.1016/j.envint.2024.108917
856	SRR26546030	PRJNA1032917	SAMN38019135	SRX22247862	1.14 Gb	others	Europe	Spain	39.9392	-3.5935	700	L0597_meta	10.1016/j.envint.2024.108917
857	SRR26546032	PRJNA1032917	SAMN38019133	SRX22247860	827.50 Mb	others	Europe	Greece	38.8211	22.5233	2	L0594_meta	10.1016/j.envint.2024.108917
858	SRR26546033	PRJNA1032917	SAMN38019132	SRX22247859	1.11 Gb	wheat	Europe	Italy	40.6067	15.4265	296	L0592_meta	10.1016/j.envint.2024.108917
859	SRR26546034	PRJNA1032917	SAMN38019131	SRX22247858	1.01 Gb	others	Europe	Spain	37.5297	-5.7632	64	L0591_meta	10.1016/j.envint.2024.108917
860	SRR26546035	PRJNA1032917	SAMN38019130	SRX22247857	1.05 Gb	wheat	Europe	Poland	50.9522	17.7152	154	L0589_meta	10.1016/j.envint.2024.108917
861	SRR26546036	PRJNA1032917	SAMN38018716	SRX22247856	1.17 Gb	others	Europe	Spain	42.0593	-1.1084	372	L0047_meta	10.1016/j.envint.2024.108917
862	SRR26546039	PRJNA1032917	SAMN38019127	SRX22247853	913.63 Mb	others	Europe	Poland	51.5062	20.9503	151	L0585_meta	10.1016/j.envint.2024.108917
863	SRR26546040	PRJNA1032917	SAMN38019126	SRX22247852	850.40 Mb	others	Europe	Spain	38.4839	-1.7207	504	L0584_meta	10.1016/j.envint.2024.108917
864	SRR26546041	PRJNA1032917	SAMN38019125	SRX22247851	1.09 Gb	others	Europe	Spain	38.6997	-6.4642	308	L0583_meta	10.1016/j.envint.2024.108917
865	SRR26546042	PRJNA1032917	SAMN38019124	SRX22247850	1.17 Gb	others	Europe	Spain	38.9045	-2.5857	972	L0579_meta	10.1016/j.envint.2024.108917
866	SRR26546044	PRJNA1032917	SAMN38019122	SRX22247848	984.79 Mb	fruit	Europe	Portugal	38.1206	-7.5314	165	L0577_meta	10.1016/j.envint.2024.108917
867	SRR26546045	PRJNA1032917	SAMN38019121	SRX22247847	790.09 Mb	others	Europe	Poland	54.4014	16.8005	44	L0576_meta	10.1016/j.envint.2024.108917
868	SRR26546046	PRJNA1032917	SAMN38019120	SRX22247846	1,013.62 Mb	maize	Europe	Spain	41.9367	0.1531	306	L0575_meta	10.1016/j.envint.2024.108917
869	SRR26546047	PRJNA1032917	SAMN38018715	SRX22247845	994.30 Mb	others	Europe	Spain	41.6821	0.9185	233	L0046_meta	10.1016/j.envint.2024.108917
870	SRR26546048	PRJNA1032917	SAMN38019119	SRX22247844	871.76 Mb	wheat	Europe	France	48.6228	-0.1658	202	L0573_meta	10.1016/j.envint.2024.108917
871	SRR26546049	PRJNA1032917	SAMN38019118	SRX22247843	1.13 Gb	others	Europe	Spain	39.7292	-4.1636	726	L0570_meta	10.1016/j.envint.2024.108917
872	SRR26546050	PRJNA1032917	SAMN38019117	SRX22247842	711.11 Mb	others	Europe	Spain	42.2555	-4.6821	835	L0569_meta	10.1016/j.envint.2024.108917
873	SRR26546051	PRJNA1032917	SAMN38019116	SRX22247841	1,021.47 Mb	maize	Europe	France	45.6837	-0.3569	11	L0568_meta	10.1016/j.envint.2024.108917
874	SRR26546052	PRJNA1032917	SAMN38019115	SRX22247840	1.12 Gb	others	Europe	Spain	39.9413	-4.8287	371	L0566_meta	10.1016/j.envint.2024.108917
875	SRR26546055	PRJNA1032917	SAMN38019083	SRX22247837	808.40 Mb	wheat	Europe	Slovakia	48.2522	17.0247	159	L0523_meta	10.1016/j.envint.2024.108917
876	SRR26546057	PRJNA1032917	SAMN38019081	SRX22247835	969.06 Mb	others	Europe	Spain	39.2615	-2.5142	712	L0521_meta	10.1016/j.envint.2024.108917
877	SRR26546058	PRJNA1032917	SAMN38019080	SRX22247834	1.10 Gb	wheat	Europe	Czech Republic	49.8867	16.8708	307	L0519_meta	10.1016/j.envint.2024.108917
878	SRR26546061	PRJNA1032917	SAMN38019078	SRX22247831	1.00 Gb	wheat	Europe	Germany	51.3705	7.9176	368	L0517_meta	10.1016/j.envint.2024.108917
879	SRR26546063	PRJNA1032917	SAMN38019076	SRX22247829	1.13 Gb	others	Europe	Spain	39.6152	-2.324	806	L0514_meta	10.1016/j.envint.2024.108917
880	SRR26546064	PRJNA1032917	SAMN38019075	SRX22247828	1.16 Gb	others	Europe	Italy	41.6473	15.6138	39	L0513_meta	10.1016/j.envint.2024.108917
881	SRR26546065	PRJNA1032917	SAMN38019074	SRX22247827	1.08 Gb	others	Europe	Spain	39.538	-2.4972	842	L0512_meta	10.1016/j.envint.2024.108917
882	SRR26546066	PRJNA1032917	SAMN38019073	SRX22247826	971.93 Mb	others	Europe	Spain	40.8372	-4.9698	979	L0511_meta	10.1016/j.envint.2024.108917
883	SRR26546067	PRJNA1032917	SAMN38019072	SRX22247825	1.33 Gb	fruit	Europe	Portugal	37.9937	-8.1042	169	L0510_meta	10.1016/j.envint.2024.108917
884	SRR26546068	PRJNA1032917	SAMN38019071	SRX22247824	1.19 Gb	maize	Europe	France	44.7403	0.6083	118	L0508_meta	10.1016/j.envint.2024.108917
885	SRR26546069	PRJNA1032917	SAMN38019070	SRX22247823	1.19 Gb	wheat	Europe	Czech Republic	49.7406	18.2456	279	L0505_meta	10.1016/j.envint.2024.108917
886	SRR26546070	PRJNA1032917	SAMN38018710	SRX22247822	886.39 Mb	others	Europe	Spain	41.9453	-0.6497	409	L0041_meta	10.1016/j.envint.2024.108917
887	SRR26546071	PRJNA1032917	SAMN38018674	SRX22247821	1.14 Gb	wheat	Europe	Germany	48.5617	10.9073	426	L0005_meta	10.1016/j.envint.2024.108917
888	SRR26546072	PRJNA1032917	SAMN38019069	SRX22247820	1.14 Gb	wheat	Europe	Germany	51.8169	9.1151	166	L0504_meta	10.1016/j.envint.2024.108917
889	SRR26546074	PRJNA1032917	SAMN38019067	SRX22247818	958.68 Mb	wheat	Europe	France	49.6507	2.2717	108	L0502_meta	10.1016/j.envint.2024.108917
890	SRR26546075	PRJNA1032917	SAMN38019066	SRX22247817	866.84 Mb	others	Europe	Spain	39.5484	-1.9827	842	L0501_meta	10.1016/j.envint.2024.108917
891	SRR26546077	PRJNA1032917	SAMN38019064	SRX22247815	1.10 Gb	wheat	Europe	France	46.3599	-0.1208	79	L0495_meta	10.1016/j.envint.2024.108917
892	SRR26546078	PRJNA1032917	SAMN38019063	SRX22247814	1.08 Gb	maize	Europe	France	47.0062	-0.1928	69	L0494_meta	10.1016/j.envint.2024.108917
893	SRR26546079	PRJNA1032917	SAMN38019062	SRX22247813	924.94 Mb	wheat	Europe	France	46.6775	-0.0234	162	L0492_meta	10.1016/j.envint.2024.108917
894	SRR26546081	PRJNA1032917	SAMN38019060	SRX22247811	1.05 Gb	wheat	Europe	Greece	37.9696	22.5938	784	L0489_meta	10.1016/j.envint.2024.108917
895	SRR26546083	PRJNA1032917	SAMN38019059	SRX22247809	982.00 Mb	wheat	Europe	Latvia	57.8396	25.3877	57	L0488_meta	10.1016/j.envint.2024.108917
896	SRR26546084	PRJNA1032917	SAMN38019058	SRX22247808	752.56 Mb	wheat	Europe	France	49.263	-0.6885	61	L0487_meta	10.1016/j.envint.2024.108917
897	SRR26546085	PRJNA1032917	SAMN38019057	SRX22247807	1.38 Gb	others	Europe	Sweden	58.4482	13.3352	88	L0486_meta	10.1016/j.envint.2024.108917
898	SRR26546086	PRJNA1032917	SAMN38019056	SRX22247806	798.33 Mb	vegetable	Europe	Finland	63.0709	21.8987	19	L0485_meta	10.1016/j.envint.2024.108917
899	SRR26546087	PRJNA1032917	SAMN38019055	SRX22247805	917.59 Mb	fruit	Europe	Italy	44.7162	11.6504	3	L0484_meta	10.1016/j.envint.2024.108917
900	SRR26546089	PRJNA1032917	SAMN38019053	SRX22247803	1.06 Gb	others	Europe	Spain	40.8164	-1.4589	1028	L0482_meta	10.1016/j.envint.2024.108917
901	SRR26546091	PRJNA1032917	SAMN38019051	SRX22247801	973.22 Mb	others	Europe	Spain	42.5535	-1.2497	426	L0480_meta	10.1016/j.envint.2024.108917
902	SRR26546092	PRJNA1032917	SAMN38019050	SRX22247800	875.80 Mb	others	Europe	Finland	62.9839	23.9869	113	L0479_meta	10.1016/j.envint.2024.108917
903	SRR26546094	PRJNA1032917	SAMN38019049	SRX22247798	1,009.26 Mb	wheat	Europe	Czech Republic	49.8525	14.717	354	L0478_meta	10.1016/j.envint.2024.108917
904	SRR26546095	PRJNA1032917	SAMN38019048	SRX22247797	970.49 Mb	others	Europe	Spain	40.7771	-4.883	941	L0476_meta	10.1016/j.envint.2024.108917
905	SRR26546097	PRJNA1032917	SAMN38019046	SRX22247795	1.18 Gb	wheat	Europe	Slovakia	48.5123	21.6503	198	L0473_meta	10.1016/j.envint.2024.108917
906	SRR26546098	PRJNA1032917	SAMN38019045	SRX22247794	953.99 Mb	wheat	Europe	Czech Republic	48.9664	17.1536	184	L0472_meta	10.1016/j.envint.2024.108917
907	SRR26546100	PRJNA1032917	SAMN38019043	SRX22247792	847.60 Mb	others	Europe	Spain	41.5458	-2.3701	1016	L0468_meta	10.1016/j.envint.2024.108917
908	SRR26546101	PRJNA1032917	SAMN38019042	SRX22247791	861.63 Mb	maize	Europe	France	49.0019	6.6786	254	L0466_meta	10.1016/j.envint.2024.108917
909	SRR26546103	PRJNA1032917	SAMN38019040	SRX22247789	1.30 Gb	wheat	Europe	France	48.2923	4.2955	132	L0462_meta	10.1016/j.envint.2024.108917
910	SRR26546104	PRJNA1032917	SAMN38018707	SRX22247788	881.38 Mb	wheat	Europe	Austria	48.2536	15.7541	221	L0038_meta	10.1016/j.envint.2024.108917
911	SRR26546105	PRJNA1032917	SAMN38019039	SRX22247787	997.55 Mb	wheat	Europe	Spain	37.4779	-2.5714	1103	L0460_meta	10.1016/j.envint.2024.108917
912	SRR26546106	PRJNA1032917	SAMN38019038	SRX22247786	879.08 Mb	wheat	Europe	Poland	50.4181	19.9541	328	L0459_meta	10.1016/j.envint.2024.108917
913	SRR26546107	PRJNA1032917	SAMN38019037	SRX22247785	964.77 Mb	fruit	Europe	Spain	38.909	-6.2112	268	L0458_meta	10.1016/j.envint.2024.108917
914	SRR26546108	PRJNA1032917	SAMN38019036	SRX22247784	1.11 Gb	wheat	Europe	Germany	50.9646	6.7108	145	L0455_meta	10.1016/j.envint.2024.108917
915	SRR26546113	PRJNA1032917	SAMN38019031	SRX22247779	1.03 Gb	wheat	Europe	France	46.1462	3.0983	326	L0447_meta	10.1016/j.envint.2024.108917
916	SRR26546117	PRJNA1032917	SAMN38019028	SRX22247775	1.05 Gb	maize	Europe	Spain	42.0395	-0.4473	379	L0441_meta	10.1016/j.envint.2024.108917
917	SRR26546119	PRJNA1032917	SAMN38018969	SRX22247773	875.41 Mb	wheat	Europe	Estonia	59.1424	26.0424	124	L0348_meta	10.1016/j.envint.2024.108917
918	SRR26546120	PRJNA1032917	SAMN38018968	SRX22247772	1.00 Gb	wheat	Europe	Germany	52.9874	9.4789	53	L0347_meta	10.1016/j.envint.2024.108917
919	SRR26546121	PRJNA1032917	SAMN38018967	SRX22247771	960.70 Mb	fruit	Europe	Italy	41.399	15.5196	113	L0346_meta	10.1016/j.envint.2024.108917
920	SRR26546122	PRJNA1032917	SAMN38018966	SRX22247770	1.25 Gb	others	Europe	Spain	37.1271	-4.9626	435	L0345_meta	10.1016/j.envint.2024.108917
921	SRR26546123	PRJNA1032917	SAMN38018965	SRX22247769	1.10 Gb	maize	Europe	Italy	45.8928	12.3552	47	L0344_meta	10.1016/j.envint.2024.108917
922	SRR26546125	PRJNA1032917	SAMN38018963	SRX22247767	951.76 Mb	wheat	Europe	Italy	37.5279	13.268	163	L0342_meta	10.1016/j.envint.2024.108917
923	SRR26546126	PRJNA1032917	SAMN38018962	SRX22247766	934.10 Mb	others	Europe	Finland	60.4903	25.0239	41	L0341_meta	10.1016/j.envint.2024.108917
924	SRR26546127	PRJNA1032917	SAMN38018961	SRX22247765	898.24 Mb	fruit	Europe	Italy	41.9935	13.597	649	L0339_meta	10.1016/j.envint.2024.108917
925	SRR26546128	PRJNA1032917	SAMN38018960	SRX22247764	809.27 Mb	others	Europe	Spain	37.084	-4.7709	410	L0338_meta	10.1016/j.envint.2024.108917
926	SRR26546132	PRJNA1032917	SAMN38018957	SRX22247760	906.15 Mb	wheat	Europe	France	48.6308	2.158	163	L0334_meta	10.1016/j.envint.2024.108917
927	SRR26546136	PRJNA1032917	SAMN38018953	SRX22247756	666.23 Mb	wheat	Europe	Germany	52.7093	7.4103	22	L0330_meta	10.1016/j.envint.2024.108917
928	SRR26546139	PRJNA1032917	SAMN38018950	SRX22247753	925.19 Mb	others	Europe	Finland	60.7778	22.0157	46	L0327_meta	10.1016/j.envint.2024.108917
929	SRR26546141	PRJNA1032917	SAMN38018949	SRX22247751	1.01 Gb	fruit	Europe	Greece	35.364	24.7041	121	L0326_meta	10.1016/j.envint.2024.108917
930	SRR26546143	PRJNA1032917	SAMN38018947	SRX22247749	921.12 Mb	fruit	Europe	Portugal	39.5459	-8.7814	303	L0324_meta	10.1016/j.envint.2024.108917
931	SRR26546144	PRJNA1032917	SAMN38018946	SRX22247748	1.03 Gb	others	Europe	Spain	38.8625	-1.463	911	L0322_meta	10.1016/j.envint.2024.108917
932	SRR26546146	PRJNA1032917	SAMN38018944	SRX22247746	968.41 Mb	fruit	Europe	Italy	44.916	11.5551	5	L0320_meta	10.1016/j.envint.2024.108917
933	SRR26546147	PRJNA1032917	SAMN38018943	SRX22247745	1.03 Gb	others	Europe	Spain	38.7111	-1.5062	766	L0319_meta	10.1016/j.envint.2024.108917
934	SRR26546151	PRJNA1032917	SAMN38018910	SRX22247741	910.48 Mb	others	Europe	Spain	41.5989	1.0031	326	L0276_meta	10.1016/j.envint.2024.108917
935	SRR26546158	PRJNA1032917	SAMN38018904	SRX22247734	1.14 Gb	wheat	Europe	Sweden	58.5785	16.2724	17	L0268_meta	10.1016/j.envint.2024.108917
936	SRR26546159	PRJNA1032917	SAMN38018903	SRX22247733	1,016.53 Mb	wheat	Europe	Latvia	56.3102	26.0249	102	L0267_meta	10.1016/j.envint.2024.108917
937	SRR26546161	PRJNA1032917	SAMN38018901	SRX22247731	1.28 Gb	wheat	Europe	Poland	53.66	22.335	133	L0265_meta	10.1016/j.envint.2024.108917
938	SRR26546162	PRJNA1032917	SAMN38018900	SRX22247730	827.26 Mb	wheat	Europe	Estonia	58.6899	25.975	69	L0262_meta	10.1016/j.envint.2024.108917
939	SRR26546163	PRJNA1032917	SAMN38018693	SRX22247729	900.95 Mb	wheat	Europe	Germany	51.2441	10.4726	238	L0024_meta	10.1016/j.envint.2024.108917
940	SRR26546164	PRJNA1032917	SAMN38018899	SRX22247728	657.70 Mb	others	Europe	Spain	37.9604	-4.4549	158	L0261_meta	10.1016/j.envint.2024.108917
941	SRR26546166	PRJNA1032917	SAMN38018897	SRX22247726	651.01 Mb	wheat	Europe	Latvia	56.7677	21.4108	26	L0259_meta	10.1016/j.envint.2024.108917
942	SRR26546168	PRJNA1032917	SAMN38018895	SRX22247724	8.79 Gb	wheat	Europe	Netherlands	52.5998	6.6781	9	L0256_meta	10.1016/j.envint.2024.108917
943	SRR26546174	PRJNA1032917	SAMN38018692	SRX22247718	890.36 Mb	others	Europe	Spain	39.1309	-1.5099	691	L0023_meta	10.1016/j.envint.2024.108917
944	SRR26546175	PRJNA1032917	SAMN38018889	SRX22247717	1.07 Gb	wheat	Europe	France	50.5938	1.8037	122	L0247_meta	10.1016/j.envint.2024.108917
945	SRR26546180	PRJNA1032917	SAMN38019313	SRX22248060	905.58 Mb	wheat	Europe	Greece	38.4726	22.8044	183	L0862_meta	10.1016/j.envint.2024.108917
946	SRR26546182	PRJNA1032917	SAMN38019311	SRX22248058	1.10 Gb	maize	Europe	Poland	52.9235	17.6735	103	L0858_meta	10.1016/j.envint.2024.108917
947	SRR26546187	PRJNA1032917	SAMN38019307	SRX22248053	1.04 Gb	others	Asia	Cyprus	35.0004	33.8651	40	L0847_meta	10.1016/j.envint.2024.108917
948	SRR26546189	PRJNA1032917	SAMN38019305	SRX22248051	992.06 Mb	wheat	Europe	Greece	38.0112	23.36	33	L0844_meta	10.1016/j.envint.2024.108917
949	SRR26546190	PRJNA1032917	SAMN38019304	SRX22248050	1.07 Gb	wheat	Europe	Poland	52.4927	22.8716	164	L0843_meta	10.1016/j.envint.2024.108917
950	SRR26546194	PRJNA1032917	SAMN38019300	SRX22248046	1.02 Gb	wheat	Europe	France	46.5908	2.2013	246	L0837_meta	10.1016/j.envint.2024.108917
951	SRR26546195	PRJNA1032917	SAMN38018733	SRX22248045	1.52 Gb	wheat	Europe	Germany	48.6839	13.1099	306	L0065_meta	10.1016/j.envint.2024.108917
952	SRR26546196	PRJNA1032917	SAMN38019299	SRX22248044	1.04 Gb	maize	Asia	Cyprus	34.8251	33.5324	26	L0836_meta	10.1016/j.envint.2024.108917
953	SRR26546197	PRJNA1032917	SAMN38019298	SRX22248043	854.94 Mb	maize	Asia	Cyprus	34.8993	32.5092	439	L0835_meta	10.1016/j.envint.2024.108917
954	SRR26546201	PRJNA1032917	SAMN38019294	SRX22248039	1.01 Gb	wheat	Europe	Romania	46.0345	26.129	570	L0831_meta	10.1016/j.envint.2024.108917
955	SRR26546202	PRJNA1032917	SAMN38019293	SRX22248038	1,020.00 Mb	maize	Europe	Romania	44.8786	27.3725	50	L0830_meta	10.1016/j.envint.2024.108917
956	SRR26546204	PRJNA1032917	SAMN38019291	SRX22248036	984.20 Mb	maize	Europe	Romania	47.6404	27.0226	155	L0827_meta	10.1016/j.envint.2024.108917
957	SRR26546205	PRJNA1032917	SAMN38019290	SRX22248035	977.59 Mb	maize	Europe	Romania	47.8652	26.8787	115	L0826_meta	10.1016/j.envint.2024.108917
958	SRR26546206	PRJNA1032917	SAMN38018732	SRX22248034	1.11 Gb	others	Europe	Denmark	56.2403	9.4037	76	L0064_meta	10.1016/j.envint.2024.108917
959	SRR26546207	PRJNA1032917	SAMN38019289	SRX22248033	976.52 Mb	wheat	Europe	Romania	44.3281	28.4149	66	L0825_meta	10.1016/j.envint.2024.108917
960	SRR26546208	PRJNA1032917	SAMN38019288	SRX22248032	949.63 Mb	maize	Europe	Romania	47.5233	27.0651	174	L0824_meta	10.1016/j.envint.2024.108917
961	SRR26546209	PRJNA1032917	SAMN38019287	SRX22248031	1.08 Gb	wheat	Europe	Romania	45.8522	27.8228	155	L0822_meta	10.1016/j.envint.2024.108917
962	SRR26546212	PRJNA1032917	SAMN38019256	SRX22248028	930.21 Mb	others	Europe	Spain	41.2196	0.0759	278	L0782_meta	10.1016/j.envint.2024.108917
963	SRR26546213	PRJNA1032917	SAMN38019255	SRX22248027	924.06 Mb	others	Europe	Poland	53.0783	15.5119	81	L0781_meta	10.1016/j.envint.2024.108917
964	SRR26546214	PRJNA1032917	SAMN38019254	SRX22248026	1.03 Gb	wheat	Europe	Lithuania	54.7312	23.0712	49	L0780_meta	10.1016/j.envint.2024.108917
965	SRR30209931	PRJNA1142257	SAMN42934610	SRX25672950	3.3Gb	fruit	Africa	Egypt	30.0131	31.2089	—	Mz49	—
966	SRR23012428	PRJNA870722	SAMN30330350	SRX18968104	2.88 Gb	wheat	Oceania	Australia	-27.34	153.247	—	BNE	10.1111/gcb.16586
967	SRR23012429	PRJNA870722	SAMN30330349	SRX18968103	3.03 Gb	maize	Africa	Mozambique	-18.48	32.47	—	MZ	10.1111/gcb.16586
968	SRR23012430	PRJNA870722	SAMN30330348	SRX18968102	3.11 Gb	maize	Africa	Cameroon	4.12	9.17	—	DLA	10.1111/gcb.16586
969	SRR23012431	PRJNA870722	SAMN30330347	SRX18968101	2.83 Gb	wheat	Europe	Germany	53.33	8.35	—	GER	10.1111/gcb.16586
970	SRR23012432	PRJNA870722	SAMN30330346	SRX18968100	3.17 Gb	maize	Europe	Italy	45.28	9.1	—	MIL	10.1111/gcb.16586
971	SRR23012434	PRJNA870722	SAMN30330345	SRX18968098	2.99 Gb	maize	South America	Peru	8.27	-73.24	—	Peru	10.1111/gcb.16586
972	SRR23012435	PRJNA870722	SAMN30330344	SRX18968097	2.48 Gb	maize	North America	United States	38.6	-121.39	—	LA	10.1111/gcb.16586
973	SRR23012436	PRJNA870722	SAMN30330343	SRX18968096	2.78 Gb	maize	North America	United States	38.32	-121.52	—	COB	10.1111/gcb.16586
974	SRR23012437	PRJNA870722	SAMN30330342	SRX18968095	2.84 Gb	wheat	Asia	Pakistan	33.4	73.08	—	ISI	10.1111/gcb.16586
975	SRR24008508	PRJNA930013	SAMN33749457	SRX19811849	3.03 Gb	others	Africa	Senegal	14.37	-16.06	—	ES1D_S101	—
976	SRR24008534	PRJNA930013	SAMN33749456	SRX19811823	3.94 Gb	others	Africa	Senegal	14.37	-16.06	—	EGS1_S17	—
977	SRR24008551	PRJNA930013	SAMN33749454	SRX19811806	2.87 Gb	others	Africa	Senegal	14.52	-16.43	—	DGS1_S76	—
978	SRR24008552	PRJNA930013	SAMN33749453	SRX19811805	3.83 Gb	vegetable	Africa	Senegal	15.19	-16.02	—	BS2D_S15	—
979	SRR24008584	PRJNA930013	SAMN33749452	SRX19811773	3.95 Gb	vegetable	Africa	Senegal	15.19	-16.02	—	BGS1_S13	—
980	SRR24008509	PRJNA930013	SAMN33749451	SRX19811848	5.40 Gb	others	Africa	Senegal	15.19	-16.59	—	AMF2D_S52	—
981	SRR24008580	PRJNA930013	SAMN33749450	SRX19811777	3.54 Gb	others	Africa	Senegal	15.19	-16.59	—	AGS2_S48	—
982	SRR24008523	PRJNA930013	SAMN33749461	SRX19811834	4.13 Gb	others	Africa	Senegal	13.61	-15.8	—	YMN2D_S128	—
983	SRR24008524	PRJNA930013	SAMN33749460	SRX19811833	2.84 Gb	others	Africa	Senegal	13.61	-15.8	—	YMN1R_S127	—
984	SRR24008506	PRJNA930013	SAMN33749459	SRX19811851	3.77 Gb	others	Africa	Senegal	13.83	-16.27	—	XGS1D_S8	—
985	SRR24008568	PRJNA930013	SAMN33749458	SRX19811789	3.48 Gb	others	Africa	Senegal	13.83	-16.27	—	XS2_S116	—
