# Supplementary material for: Global health risk assessment of antibiotic resistance in agricultural soils
Source: Research Square preprint supplement (doi:10.21203/rs.3.rs-7635655/v1), 2025-10-13
Supplement: Supplementary file 2 [file 05db25ab64f673fe5c6d1cdb.xlsx]

## Sheet: Supplementary Table 10
Supplementary Table 10 The 10 principal components with a cumulative contribution rate of at least 80% and their interpretations
	RC7	RC8	RC1	RC3	RC5	RC4	RC2	RC6	RC9	RC10
SS Loadings	8.519	8.262	7.191	6.542	5.247	5.066	4.461	2.855	2.149	1.96
Proportion Var	0.131	0.127	0.111	0.101	0.081	0.078	0.069	0.044	0.033	0.03
Cumulative Var	0.131	0.258	0.369	0.469	0.55	0.628	0.697	0.741	0.774	0.804
Interpretation	Temperature	Economic development level and antibiotic use	Precipitation	Climate, Soil pH, and Moisture	P content	Agricultural Production and Fertilizer Use	C and N content	Soil texture	Socioeconomic and land use indicators	Livestock
bio1	0.71701	0.475673	0.337604	0.254459	-0.0592246	0.0415959	-0.108569	0.0474245	0.114937	0.0785273
bio2	-0.123524	-0.119492	-0.378339	0.623958	0.0253803	-0.240485	-0.04772	0.0881522	-0.233319	0.398796
bio3	0.675035	0.0517537	0.429462	0.230968	-0.00319574	-0.206641	0.118611	-0.188213	-0.228303	0.212203
bio4	-0.895079	0.0151692	-0.245735	0.0327374	-0.0440041	0.0967413	-0.0628213	0.271081	0.107181	0.0072998
bio5	0.173533	0.388409	0.132878	0.617385	-0.037802	0.0315346	-0.141631	0.314545	0.264048	0.17771
bio6	0.87139	0.193437	0.36057	0.0907673	0.0105259	0.0183851	0.00269699	-0.107145	0.087811	-0.0472823
bio7	-0.84085	-0.0165439	-0.31824	0.203795	-0.0295551	-0.00418815	-0.071722	0.266694	0.0351442	0.136604
bio8	-0.0865336	0.806183	0.267274	-0.0372976	-0.214387	0.11474	-0.167203	0.0617126	0.0231294	0.10499
bio9	0.832226	-0.0191435	0.166468	0.362541	0.117292	-0.057704	0.0659686	-0.0411553	0.119876	-0.0227535
bio10	0.251089	0.615028	0.267249	0.396617	-0.0881563	0.146982	-0.171975	0.273897	0.278179	0.0778122
bio11	0.86521	0.280523	0.324645	0.163492	-0.00434395	-0.0117381	-0.0323791	-0.0905622	0.044872	0.0293008
bio12	0.290689	0.477891	0.670947	-0.364685	-0.111903	-0.015355	-0.0982556	0.170073	0.0012939	-0.0426292
bio13	0.301674	0.783529	0.302852	-0.209389	-0.129307	0.0747913	-0.174864	0.161686	-0.039234	0.065928
bio14	0.183769	-0.0761643	0.870842	-0.274862	-0.0223871	0.00670769	0.160587	-0.0287789	0.077172	-0.120121
bio15	0.0662758	0.64428	-0.394641	0.314644	-0.10239	0.0767214	-0.0756783	0.0115448	-0.0864315	0.365873
bio16	0.335883	0.739787	0.317077	-0.264789	-0.132489	0.0117248	-0.192678	0.157978	-0.0910546	0.0658305
bio17	0.184153	-0.0515808	0.868082	-0.294859	-0.0158091	0.00159812	0.128635	-0.00268691	0.103284	-0.137811
bio18	0.131407	0.70671	0.228581	-0.41252	-0.181709	0.0696194	-0.257689	0.12631	-0.150779	-0.0966863
bio19	0.36622	-0.148092	0.788891	-0.018807	0.0391309	-0.0710442	0.267008	0.0589127	0.0980229	0.00343631
bdod	0.269093	0.0131847	-0.193892	0.746254	0.0429461	0.245343	-0.283518	0.0406354	-0.0113709	0.0383533
cec	-0.382814	-0.372513	-0.236503	-0.41082	-0.135167	-0.177282	0.403458	0.140202	-0.0351598	0.0869344
cfvo	0.485245	0.287337	-0.391524	-0.183663	0.138836	-0.127471	-0.200446	-0.0725857	-0.117066	-0.351277
phh2o	0.00105823	-0.0632806	-0.409499	0.719716	0.177083	0.333976	-0.05049	0.0761689	0.0815199	-0.222197
phkcl	-0.0559611	-0.28037	-0.337641	0.718474	0.241664	0.0555471	-0.050679	-0.0799956	-0.0831286	-0.142043
sand	0.0857815	-0.0314128	-0.022906	-0.0184136	-0.0315167	-0.155954	0.188548	-0.869988	0.0274066	0.161586
silt	-0.479089	-0.0900172	-0.0747263	-0.112484	0.0679827	0.231527	-0.196828	0.665183	0.0657131	-0.0992031
clay	0.582863	0.194546	0.155373	0.205213	-0.0480834	-0.0791836	-0.0317316	0.520436	-0.14861	-0.134423
soc	0.0615581	0.323229	-0.0120824	-0.742042	-0.178667	0.0380928	0.240959	-0.0913223	0.193355	-0.0247778
ocs	-0.0363841	0.0805012	0.215318	-0.745245	-0.180375	-0.0849791	0.379245	-0.0542859	0.121208	0.116844
apatitep	-0.129473	-0.211061	-0.0133871	0.252673	0.710028	0.00815124	0.12515	0.0125148	0.0924376	0.126991
inorganicp	-0.00538685	-0.112374	-0.0562778	0.193083	0.92941	0.0430047	0.0731002	-0.00363276	0.0711771	-0.0669885
occludedp	0.0690604	-0.0556575	0.0156228	-0.0379049	0.879553	-0.136247	-0.0259533	0.0665532	-0.0862018	0.0235589
organicp	0.00608408	-0.110255	-0.0815982	0.115804	0.886098	0.0416373	0.0927564	-0.0287621	0.0291938	-0.134375
mineralp	0.116836	-0.0772932	-0.00146811	-0.0718472	0.921625	-0.0872234	-0.0128856	-0.0410232	-0.0498374	0.0146139
totalp	-0.016003	-0.145686	-0.0325883	0.142743	0.967826	-0.0126556	0.0836563	0.00362262	0.0289094	-0.012817
smc30	-0.0295072	-0.228318	0.198531	-0.0642461	0.0985982	0.019182	0.846753	-0.163089	-0.0560293	-0.0673973
smc100	-0.053483	-0.263285	0.204743	-0.105325	0.0977984	0.0202801	0.866144	-0.156179	-0.00251253	-0.0725571
smn30	0.214442	-0.187953	0.187523	-0.103383	0.0954753	-0.0064281	0.898162	-0.0249989	0.066697	0.0114144
smn100	0.162605	-0.202342	0.172373	-0.157377	0.0880063	-0.0188784	0.881031	-0.0142616	0.119753	0.0113155
cn30	-0.717203	-0.263777	0.145495	0.102518	0.0257355	0.00133665	-0.108797	-0.354781	-0.266304	-0.0516283
cn100	-0.717204	-0.263777	0.145494	0.102517	0.0257349	0.00133429	-0.108798	-0.354778	-0.266308	-0.051625
cattle	-0.0795516	-0.325142	-0.00421318	-0.146294	0.0694193	0.332845	-0.0575714	-0.172027	-0.191075	0.587583
chicken	0.153878	0.253239	0.712904	0.0735753	-0.00206736	0.408649	0.148862	-0.0533769	0.0397122	0.0454866
duck	-0.0973551	0.394779	0.148	0.0338309	-0.0181781	0.570177	-0.066465	0.0624436	0.0929462	-0.0335106
goat	-0.0111045	0.315843	-0.132335	0.228468	-0.0397835	0.498723	0.00990552	-0.0912958	-0.0517302	0.197356
horse	0.0556794	-0.00757997	-0.128369	0.0605725	-0.0668949	-0.101638	-0.0504228	-0.162936	0.122904	0.660579
pig	-0.0390479	0.17019	0.0170592	-0.0128058	-0.00835809	0.672388	-0.0557792	0.00394992	-0.0547004	-0.04256
sheep	0.0470818	-0.0771036	-0.130332	0.345495	0.045634	0.175277	0.00504221	-0.314499	0.146787	0.0816617
ea	0.366045	0.357653	0.71445	-0.130908	-0.131231	-0.138029	0.0376787	0.143047	-0.0922515	-0.0333835
ep	0.573154	0.326458	0.56201	0.253393	-0.108164	-0.220535	0.0862903	0.0913808	-0.033956	0.177667
smroot	-0.325622	0.105543	-0.235734	-0.63099	-0.0677224	0.16779	-0.25907	0.274167	0.0941039	-0.087494
smsurf	-0.31626	0.0538346	-0.259654	-0.652264	-0.0532932	0.156646	-0.248765	0.273987	0.0808562	-0.125697
pmp	0.0542983	0.089732	-0.125324	-0.127935	-0.0559658	0.906057	-0.0149611	-0.0213373	-0.00808905	0.0909496
pfa	-0.177506	0.0894139	0.0521009	0.31298	-0.0277859	0.75062	0.0156989	0.256339	0.131492	-0.169308
nmp	0.0201072	0.018825	-0.0798946	-0.0850473	-0.0560811	0.917861	0.0178016	-0.0206492	0.0281419	0.1325
nfa	-0.141026	0.00107444	0.0725713	0.159035	0.00449123	0.82491	0.0531208	0.164357	0.187771	-0.200295
land	0.0145035	-0.169898	-0.331188	0.212124	-0.0852047	0.101778	-0.100022	0.0765241	-0.503086	0.00302754
population	-0.0267097	0.325347	0.297878	0.106492	-0.0334602	0.113679	0.0062668	-0.00219946	0.54775	-0.0668292
dti	0.218587	0.115619	0.768202	0.0995408	-0.0397695	-0.0998696	0.250825	-0.0569493	0.0980567	-0.0542964
ghii	0.25786	-0.0471908	-0.00542432	0.0343194	-0.0103053	0.133303	0.133505	0.0469481	0.544712	-0.0525483
gdp	-0.0394306	-0.181973	-0.0318784	-0.156626	0.0364853	0.0317063	-0.0770452	-0.0370642	0.669349	0.109914
gdppc	-0.185606	-0.816009	0.00996856	0.0722697	0.0937707	-0.162339	0.147479	0.16634	-0.0378342	0.296855
hdi	-0.293149	-0.849765	0.115734	0.0805042	0.0801066	-0.167448	0.172849	0.0917116	0.00678517	0.174452
acc	-0.0542269	-0.765624	0.0695559	0.281514	0.203883	-0.136221	-0.0461008	0.142311	-0.0709331	-0.0231904
acl	0.151042	0.779125	-0.0760286	0.0316698	-0.0377823	0.221861	-0.27007	0.151804	0.0106342	-0.206129
