# Supplementary material for: Global health risk assessment of antibiotic resistance in agricultural soils
Source: Research Square preprint supplement (doi:10.21203/rs.3.rs-7635655/v1), 2025-10-13
Supplement: Supplementary file 3 [file 18c01e4f048e02d54acd1174.xlsx]

## Sheet: Supplementary Table 5 
Supplementary Table 5 MGEs detected in this study
MGEs	Types	Subtypes	Detected Frequency	Average	Max	Min	Total
327_IS91_LRKR01000133.1	insertion_element_IS91	IS91	0.191878	1.75239	334.65	0	1726.1
270_IS91_MOFF01000153.1	insertion_element_IS91	IS91	0.26599	1.69015	333.262	0	1664.8
406_IS91_CP018710.1	insertion_element_IS91	IS91	0.170558	1.60088	301.117	0	1576.87
301_tnpA_AB362339.1	transposase	tnpA	0.080203	1.58476	542.607	0	1560.99
366_tnpA_JFVF01000080.1	transposase	tnpA	0.290355	1.38681	90.951	0	1366
2649_IS91_MTKG01000140.1	insertion_element_IS91	IS91	0.191878	1.1219	200.989	0	1105.07
775_IS91_MOHT01000119.1	insertion_element_IS91	IS91	0.201015	1.08786	198.261	0	1071.54
2591_IS91_CP005927.1	insertion_element_IS91	IS91	0.0192893	0.999088	982.714	0	984.102
2228_tnpA_AM260957.1	transposase	tnpA	0.275127	0.93	70.7903	0	916.05
1777_tnpA_AH009976.2	transposase	tnpA	0.156345	0.892069	872.599	0	878.688
140_repUS18__rep(pKKS825)_FN377602.2	plasmid	repUS18	0.0812183	0.819147	368.094	0	806.86
502_IS91_MOIM01000174.1	insertion_element_IS91	IS91	0.122843	0.776466	161.614	0	764.819
1536_tnpA_EF151283.1	transposase	tnpA	0.963452	0.747211	5.50784	0	736.002
1850_ISRj1_X02581	ISRj1	ISRj1	0.848731	0.741367	10.3665	0	730.247
1274_IS91_CP001349.1	insertion_element_IS91	IS91	0.906599	0.724759	4.71621	0	713.888
876_tnpA_JFWY01000082.1	transposase	tnpA	0.182741	0.665178	48.5556	0	655.2
2473_tnpA_KM083808.1	transposase	tnpA	0.0720812	0.66391	269.548	0	653.952
198_IncFIB(pECLA)_1_pECLA_CP001919	plasmid	IncFIB(pECLA)	0.0101523	0.587762	578.722	0	578.946
419_intI1_FJ790886.1	integrase	intI1	0.210152	0.580179	53.4498	0	571.476
2186_tnpA_HF953351.1	transposase	tnpA	0.0213198	0.578818	161.606	0	570.136
691_tnpA_CTIT01000004.1	transposase	tnpA	0.0426396	0.561551	543.326	0	553.128
210_IncFII(pECLA)_1_pECLA_CP001919	plasmid	IncFII(pECLA)	0.0243655	0.546054	536.962	0	537.863
1653_qacEdelta_KT334335.1	qacEdelta	qacEdelta	0.15736	0.51652	46.143	0	508.773
2710_tnpA_AY939911.1	transposase	tnpA	0.0812183	0.498395	201.201	0	490.919
1972_tnpA_EU935738.1	transposase	tnpA	0.0964467	0.483845	78.4316	0	476.588
1112_qacEdelta_AF261825.2	qacEdelta	qacEdelta	0.154315	0.465853	66.8735	0	458.865
542_intI1_DQ647028.2	integrase	intI1	0.250761	0.455896	34.874	0	449.057
528_tnpA_KT282968.1	transposase	tnpA	0.237563	0.454158	87.8176	0	447.345
1433_tnpA_KJ488943.1	transposase	tnpA	0.113706	0.452648	69.665	0	445.858
1004_tnpA_KT779035.1	transposase	tnpA	0.108629	0.437273	90.3553	0	430.714
1999_Tn916-orf13_KC414929	Tn916	Tn916-orf13	0.0994924	0.430635	94.9317	0	424.176
1697_IS91_CP002657.1	insertion_element_IS91	IS91	0.853807	0.429733	4.59742	0	423.287
1007_IS91_CP017105.1	insertion_element_IS91	IS91	0.965482	0.425698	3.89062	0	419.312
1780_tnpA_EF682209.1	transposase	tnpA	0.0507614	0.424527	142.434	0	418.159
1793_intI1_KU736868.1	integrase	intI1	0.17665	0.419525	35.8616	0	413.232
844_istB_KU254577.1	istB	istB	0.656853	0.416726	95.7242	0	410.475
945_tnpA_AB032203.1	transposase	tnpA	0.807107	0.414541	124.506	0	408.323
1002_tnpA_JQ364968.1	transposase	tnpA	0.071066	0.407389	78.7813	0	401.278
2602_tnpA_CU459003.1	transposase	tnpA	0.939086	0.406808	2.66947	0	400.706
779_tnpA_GU067641.1	transposase	tnpA	0.339086	0.404879	69.1209	0	398.806
2364_tnpA_CP000864.1	transposase	tnpA	0.147208	0.404655	70.1263	0	398.585
712_tnpA_EU850412.1	transposase	tnpA	0.140102	0.400079	105.167	0	394.078
1284_IS91_MSDV01000044.1	insertion_element_IS91	IS91	0.772589	0.390792	102.681	0	384.931
2640_Tn916-orf14_KC414929	Tn916	Tn916-orf14	0.0964467	0.386954	86.4799	0	381.149
1341_Tn916-orf9_KC414929	Tn916	Tn916-orf9	0.0649746	0.382578	93.787	0	376.84
660_tnpA_CP000355.2	transposase	tnpA	0.44264	0.378701	14.1723	0	373.021
843_intI1_KM234279.1	integrase	intI1	0.736041	0.371754	31.0665	0	366.178
432_tnpA_FJ628170.1	transposase	tnpA	0.0629442	0.364695	57.1505	0	359.224
2082_tnpA_CU459003.1	transposase	tnpA	0.719797	0.362453	4.57864	0	357.016
344_tnpA_LM676437.1	transposase	tnpA	0.906599	0.362209	2.54283	0	356.776
1060_intI1_KX029331.1	integrase	intI1	0.201015	0.362092	31.1257	0	356.661
1924_Tn916-orf7_KC414929	Tn916	Tn916-orf7	0.0700508	0.361992	91.2692	0	356.562
1535_Tn916-orf20_KC414929	Tn916	Tn916-orf20	0.0974619	0.352909	88.2989	0	347.615
755_IS26_KT334335.1	IS26	IS26	0.0812183	0.347596	80.8315	0	342.382
278_tnpA_AB304081.1	transposase	tnpA	0.226396	0.341048	23.0195	0	335.933
1395_Int-Tn916_KC414929.1	integrase	Int-Tn916	0.0994924	0.339117	82.0254	0	334.03
2233_tnpA_KP698941.1	transposase	tnpA	0.0304569	0.337313	144.287	0	332.253
1466_tnpA_CP000355.2	transposase	tnpA	0.283249	0.331052	12.3197	0	326.087
2646_Tn916-orf15_KC414929	Tn916	Tn916-orf15	0.13401	0.330121	86.4048	0	325.169
872_Tn916-orf6_KC414929	Tn916	Tn916-orf6	0.057868	0.325719	88.582	0	320.833
2634_Tn916-orf16_KC414929	Tn916	Tn916-orf16	0.128934	0.32076	86.1293	0	315.948
1356_Tn916-orf17_KC414929	Tn916	Tn916-orf17	0.0700508	0.304739	79.5874	0	300.168
1000_tnpA_JQ364968.1	transposase	tnpA	0.0893401	0.3041	48.8167	0	299.538
2436_tnpA_X92946.1	transposase	tnpA	0.0507614	0.297514	103.406	0	293.052
2280_qacEdelta_KJ620481.1	qacEdelta	qacEdelta	0.13198	0.296711	22.8887	0	292.26
979_tnpA_KX810025.1	transposase	tnpA	0.035533	0.29511	116.913	0	290.683
1831_tnpA_AY639948.1	transposase	tnpA	0.941117	0.294047	4.6564	0	289.637
1532_Tn916-orf18_KC414929	Tn916	Tn916-orf18	0.0700508	0.288108	71.877	0	283.786
2716_tnpA_JX627737.1	transposase	tnpA	0.0812183	0.284156	52.6008	0	279.894
2600_IS91_CP012199.1	insertion_element_IS91	IS91	0.667005	0.279644	10.8266	0	275.449
2309_tnpAN_CP003376.1	transposase	tnpAN	0.169543	0.279407	29.1883	0	275.216
1325_Tn916-orf8_KC414929	Tn916	Tn916-orf8	0.0538071	0.279335	65.5168	0	275.145
1520_tnpA_HE613569.1	transposase	tnpA	0.0588832	0.274534	71.6937	0	270.416
269_intI1_EU014075.1	integrase	intI1	0.162437	0.263855	25.602	0	259.897
2633_Tn916-orf19_KC414929	Tn916	Tn916-orf19	0.0446701	0.262488	68.6389	0	258.55
1016_tnpA_AJ971344.1	transposase	tnpA	0.11269	0.261393	46.7149	0	257.472
1037_tnpA_AY849557.2	transposase	tnpA	0.0467005	0.257251	89.546	0	253.392
1259_tnpA_JX469831.1	transposase	tnpA	0.121827	0.255369	46.1986	0	251.539
449_tnpA_CDAD01000027.1	transposase	tnpA	0.829442	0.253873	10.9412	0	250.064
2455_tnpA_AY509004.1	transposase	tnpA	0.0944162	0.250756	38.2849	0	246.995
1366_Tn916-orf5_KC414929	Tn916	Tn916-orf5	0.0517766	0.249651	63.8413	0	245.906
426_IS91_CP001921.1	insertion_element_IS91	IS91	0.0588832	0.248908	38.7647	0	245.175
1771_tnpA_KR066794.1	transposase	tnpA	0.0446701	0.246552	81.518	0	242.853
117_rep22_1_repB(pUB110)_X03408.1	plasmid	rep22	0.102538	0.243787	93.8002	0	240.13
1837_IS91_CP012199.1	insertion_element_IS91	IS91	0.737056	0.237566	6.1671	0	234.002
1283_tnpA_JMOZ01000294.1	transposase	tnpA	0.198985	0.236687	16.3562	0	233.137
1947_tnpA_JN704639.1	transposase	tnpA	0.0314721	0.234992	221.359	0	231.467
480_tnpA_JX077110.1	transposase	tnpA	0.111675	0.234644	67.5918	0	231.124
550_tnpA_11_KU665641.1	transposase	tnpA	0.013198	0.230984	226.581	0	227.519
1034_intI1_KT334335.1	integrase	intI1	0.0984772	0.22806	18.7763	0	224.639
799_tnpA_FJ628167.2	transposase	tnpA	0.0335025	0.226683	210.273	0	223.282
1500_tnpA_KC354801.1	transposase	tnpA	0.0670051	0.21889	49.7075	0	215.606
2474_Xis-Tn916_KC414929.1	Tn916	Xis-Tn916	0.0467005	0.21418	52.5961	0	210.967
1710_IS91_CP000697.1	insertion_element_IS91	IS91	0.684264	0.20925	1.69269	0	206.111
2672_IS91_MKEM01000273.1	insertion_element_IS91	IS91	0.0609137	0.207881	33.4496	0	204.763
359_tnpA_FR718870.1	transposase	tnpA	0.0517766	0.207851	80.4588	0	204.733
188_IncFIB(pQil)_1_pQil_JN233705	plasmid	IncFIB(pQil)	0.00203046	0.202239	199.139	0	199.205
2281_istB_AM261760.1	istB	istB	0.0182741	0.195987	191.996	0	193.047
648_tnpA_CCYP01000054.1	transposase	tnpA	0.88934	0.195702	2.19721	0	192.767
2235_tnpA_FR718867.1	transposase	tnpA	0.0446701	0.191664	175.559	0	188.789
368_tnpA_KT364224.1	transposase	tnpA	0.0994924	0.191242	29.1702	0	188.373
1204_tnpA_EU213261.1	transposase	tnpA	0.0517766	0.189921	41.8994	0	187.072
725_istA2_AM261760.1	istA2	istA2	0.0162437	0.18296	179.356	0	180.216
1486_tnpA_EF011038.1	transposase	tnpA	0.0142132	0.178768	175.781	0	176.087
1669_IS91_CP009122.1	insertion_element_IS91	IS91	0.458883	0.172298	17.2776	0	169.713
2756_tnpA_KX810026.1	transposase	tnpA	0.0568528	0.171996	61.8488	0	169.416
1529_qacEdelta_KC820804.1	qacEdelta	qacEdelta	0.114721	0.171012	13.2465	0	168.447
1735_IS91_MLYM01000036.1	insertion_element_IS91	IS91	0.101523	0.166625	30.2714	0	164.125
1107_tnpA_HE613569.1	transposase	tnpA	0.0527919	0.163922	43.6634	0	161.464
238_IncQ1_1__HE654726	plasmid	IncQ1	0.0527919	0.158783	75.5966	0	156.402
2513_IS91_CP002417.1	insertion_element_IS91	IS91	0.60203	0.158651	6.2242	0	156.271
2427_tnpA_KJ817377.1	transposase	tnpA	0.048731	0.155326	63.5018	0	152.996
292_tnpA_FKRS01000031.1	transposase	tnpA	0.0598985	0.153862	62.7487	0	151.554
1340_tniA_JX194160.1	tniA	tniA	0.184772	0.149921	17.6035	0	147.672
2223_tnpA_CR942285.1	transposase	tnpA	0.113706	0.149342	39.0733	0	147.101
562_tnpA_HE577112.1	transposase	tnpA	0.0304569	0.148744	135.712	0	146.513
2638_istB_JX194160.1	istB	istB	0.801015	0.146099	3.66341	0	143.907
2192_tnpA_DQ303459.3	transposase	tnpA	0.0213198	0.146057	142.487	0	143.866
966_tnpA_Z96935.2	transposase	tnpA	0.516751	0.143578	5.46327	0	141.424
336_IS26_LN794248.1	IS26	IS26	0.0862944	0.14118	26.6334	0	139.063
391_tnpAcp2_KJ817377.1	transposase	tnpAcp2	0.556345	0.140711	15.2475	0	138.601
850_tnpA_HQ219726.1	transposase	tnpA	0.0619289	0.140313	58.4656	0	138.209
2464_tnpA_KC710195.1	transposase	tnpA	0.702538	0.139471	22.7369	0	137.379
2547_tnpA_HF953351.1	transposase	tnpA	0.0284264	0.138923	54.9024	0	136.839
2479_istB1_LK391695.1	istB1	istB1	0.701523	0.135535	6.40161	0	133.502
630_tnpA_AY439015.3	transposase	tnpA	0.838579	0.132346	1.08364	0	130.36
2288_tnpA_CDAC01000056.1	transposase	tnpA	0.789848	0.132203	1.16823	0	130.22
294_IS91_MOFA01000112.1	insertion_element_IS91	IS91	0.104569	0.128487	23.0257	0	126.559
2053_tniA_JX235356.1	tniA	tniA	0.15736	0.126359	12.73	0	124.464
2763_tnpA_GQ919187.1	transposase	tnpA	0.805076	0.124979	1.30047	0	123.104
1099_IS91_MNXT01000334.1	insertion_element_IS91	IS91	0.84264	0.124682	1.49201	0	122.812
1028_IS91_CP000490.1	insertion_element_IS91	IS91	0.580711	0.124629	1.95015	0	122.76
351_tnpA_AB588180.1	transposase	tnpA	0.0233503	0.122725	63.5388	0	120.884
447_IS91_CP000473.1	insertion_element_IS91	IS91	0.588832	0.119959	3.80011	0	118.159
548_istA_KU254577.1	istA	istA	0.336041	0.119286	31.7341	0	117.496
1348_istB_AB270530.1	istB	istB	0.542132	0.119267	12.2394	0	117.478
681_tnpA_JN415682.1	transposase	tnpA	0.0335025	0.118547	44.77	0	116.769
2589_IS91_FQ482074.1	insertion_element_IS91	IS91	0.459898	0.117284	3.10641	0	115.525
361_tniB_KF056330.2	tniB	tniB	0.222335	0.114854	13.3834	0	113.132
2374_tnpA_KX029332.1	transposase	tnpA	0.00913706	0.114394	112.416	0	112.678
2111_IS91_CP002657.1	insertion_element_IS91	IS91	0.26802	0.113888	6.76612	0	112.18
738_tnpA_FP885907.1	transposase	tnpA	0.845685	0.113299	1.3222	0	111.6
2315_IS91_CP009122.1	insertion_element_IS91	IS91	0.469036	0.111963	4.81916	0	110.283
1053_IS91_MOXO01000337.1	insertion_element_IS91	IS91	0.774619	0.111786	0.857497	0	110.109
2383_IS91_MOXN01000077.1	insertion_element_IS91	IS91	0.0944162	0.111028	16.6357	0	109.363
735_istA7_HG916826.1	istA7	istA7	0.0365482	0.110595	34.4825	0	108.937
636_tnpA_KP893385.1	transposase	tnpA	0.0477157	0.110458	32.9331	0	108.801
965_tnpA_JQ364968.1	transposase	tnpA	0.0568528	0.110291	33.8948	0	108.636
839_IS91_CP000539.1	insertion_element_IS91	IS91	0.456853	0.11019	2.55075	0	108.537
832_tnpA_GU591497.1	transposase	tnpA	0.0761421	0.107668	33.1826	0	106.053
367_qacEdelta_EU117158.1	qacEdelta	qacEdelta	0.161421	0.107662	8.9095	0	106.047
2284_tnpA_KP900016.1	transposase	tnpA	0.0172589	0.107104	104.407	0	105.497
2013_tniB_AP013064.1	tniB	tniB	0.164467	0.106761	12.1721	0	105.159
317_tnpA_KR259132.1	transposase	tnpA	0.0791878	0.106268	16.0565	0	104.674
1819_tnpA_CP000353.2	transposase	tnpA	0.771574	0.105305	1.12037	0	103.725
1622_tnpA_JX077110.1	transposase	tnpA	0.0152284	0.105194	101.962	0	103.616
1570_tniA_KF743817.1	tniA	tniA	0.105584	0.104561	12.1849	0	102.992
688_tnpA5_HG916826.1	transposase	tnpA5	0.11269	0.104232	17.4715	0	102.668
1339_IS91_CP009122.1	insertion_element_IS91	IS91	0.256853	0.104016	7.14597	0	102.456
2204_tnpA_AB646744.1	transposase	tnpA	0.0670051	0.103102	24.6796	0	101.556
2529_tnpA_EU402605.1	transposase	tnpA	0.0192893	0.103067	59.9387	0	101.521
1338_tnpA_10_CQHS01000038.1	transposase	tnpA	0.301523	0.10249	18.4789	0	100.953
1750_intI1_AF322577.2	integrase	intI1	0.123858	0.10248	9.36706	0	100.943
1624_delta-tnpA_HF545433.1	transposase	delta-tnpA	0.035533	0.100686	19.4427	0	99.1758
1620_tnpA_JN968483.3	transposase	tnpA	0.0375635	0.100215	27.1992	0	98.712
535_tnpA_FN806773.1	transposase	tnpA	0.816244	0.1002	1.00223	0	98.6968
2279_qacEdelta_JN225877.1	qacEdelta	qacEdelta	0.0964467	0.0999749	8.46181	0	98.4753
2726_IS91_CP001635.1	insertion_element_IS91	IS91	0.453807	0.0987017	5.59396	0	97.2211
1487_istA11_HG916826.1	istA11	istA11	0.313706	0.0945817	22.4101	0	93.163
2187_tnpA_KM975501.1	transposase	tnpA	0.0395939	0.0943138	25.4708	0	92.8991
2433_tnpA1_CP002153.1	transposase	tnpA1	0.828426	0.0921179	0.862854	0	90.7361
2058_ISCR20-transposase_GU441460.1	ISCR	ISCR20-transposase	0.0324873	0.0915813	38.4864	0	90.2075
2582_tnpA_JQ241791.1	transposase	tnpA	0.0568528	0.0901417	23.9589	0	88.7896
1763_tnpA_DQ839391.1	transposase	tnpA	0.137056	0.0892902	22.3004	0	87.9509
902_IS91_MLPZ01000009.1	insertion_element_IS91	IS91	0.0781726	0.0886426	21.1623	0	87.313
2214_delta	delta	delta	0.0294416	0.0880783	40.2399	0	86.7572
1311_tniA_KJ588780.1	tniA	tniA	0.136041	0.0879741	10.9064	0	86.6545
2771_tnpA_JQ364968.1	transposase	tnpA	0.0243655	0.087805	24.7798	0	86.4879
574_tnpA_KT225462.1	transposase	tnpA	0.0172589	0.0871185	84.5215	0	85.8117
2797_tnpA_U66917.2	transposase	tnpA	0.420305	0.0859676	19.9564	0	84.6781
573_tnpA_AP014646.1	transposase	tnpA	0.127919	0.0855075	21.962	0	84.2249
2765_tnpA2_HE572590.1	transposase	tnpA2	0.725888	0.0854226	0.964056	0	84.1413
1133_tnpA_KR822246.1	transposase	tnpA	0.0203046	0.0845678	82.58	0	83.2993
921_tnpAB_EU402605.1	transposase	tnpAB	0.0162437	0.0841911	37.4493	0	82.9283
2086_tnpA_CDAD01000016.1	transposase	tnpA	0.742132	0.0835403	1.30167	0	82.2872
710_tnpA_AY894752.1	transposase	tnpA	0.588832	0.0828371	2.92797	0	81.5946
2342_tnpA_KU736877.1	transposase	tnpA	0.0203046	0.0825336	23.417	0	81.2956
1870_istA3_LK391695.1	istA3	istA3	0.64264	0.0821051	5.95565	0	80.8735
2429_tniA_KM877517.1	tniA	tniA	0.15736	0.0820838	8.64378	0	80.8525
1303_IS91_MOKM01000292.1	insertion_element_IS91	IS91	0.0375635	0.0819185	19.0912	0	80.6898
1657_tnpA_EF059914.1	transposase	tnpA	0.0213198	0.0818469	37.1899	0	80.6192
2546_tnpA_KJ507131.1	transposase	tnpA	0.0284264	0.0818391	29.6524	0	80.6115
750_tnpA_KX276209.1	transposase	tnpA	0.0203046	0.081485	79.2875	0	80.2627
796_tnpA_AF133698.1	transposase	tnpA	0.162437	0.0814424	8.57903	0	80.2208
315_IS10R	IS10R	IS10R	0.0497462	0.0804026	16.9789	0	79.1966
823_tnpA_ADOU02000001.1	transposase	tnpA	0.641624	0.0795087	1.82549	0	78.3161
392_tnpA_JN106170.1	transposase	tnpA	0.189848	0.0791565	23.6076	0	77.9691
1067_tnpA_CP009632.1	transposase	tnpA	0.464975	0.077907	18.6756	0	76.7384
1130_qacEdelta_KR677151.1	qacEdelta	qacEdelta	0.0873096	0.0763125	7.65374	0	75.1679
2736_tnpA_CP006248.1	transposase	tnpA	0.022335	0.0754636	40.0864	0	74.3317
1426_tnpA_KF445086.1	transposase	tnpA	0.0071066	0.0751911	73.7886	0	74.0632
192_IncP(Beta)_1_Beta_U67194	plasmid	IncP(Beta)	0.0913706	0.0741794	37.9244	0	73.0667
2370_IS91_CP001349.1	insertion_element_IS91	IS91	0.322843	0.0740876	2.06192	0	72.9763
1890_IS91_CP005188.1	insertion_element_IS91	IS91	0.452792	0.0730141	1.24355	0	71.9189
2618_IS91_CP017105.1	insertion_element_IS91	IS91	0.77665	0.0722893	0.852216	0	71.2049
383_tnpA_AY509004.1	transposase	tnpA	0.147208	0.0718587	10.1878	0	70.7808
2526_tnpA_EU402605.1	transposase	tnpA	0.0162437	0.0717654	43.5608	0	70.6889
704_tnpA_CP002152.1	transposase	tnpA	0.205076	0.0711172	12.6152	0	70.0504
1321_tnpA_KX094555.1	transposase	tnpA	0.0588832	0.0706877	17.5885	0	69.6274
369_tnpA_KU682280.1	transposase	tnpA	0.0395939	0.0704378	19.8205	0	69.3812
2459_tnpA_KF861983.1	transposase	tnpA	0.0446701	0.0695974	14.2743	0	68.5534
2457_tnpA_HM440049.2	transposase	tnpA	0.0162437	0.0686119	65.5227	0	67.5827
2220_tnpA_CP006581.1	transposase	tnpA	0.296447	0.0685988	4.93689	0	67.5698
390_tnpA_FN806773.1	transposase	tnpA	0.728934	0.0684287	0.795352	0	67.4023
1475_tnpA_KR066794.1	transposase	tnpA	0.035533	0.0675813	18.1147	0	66.5676
1461_IS91_CP000490.1	insertion_element_IS91	IS91	0.435533	0.0674108	1.21492	0	66.3997
1933_IS91_MNFW01000015.1	insertion_element_IS91	IS91	0.269036	0.0666091	5.28405	0	65.6099
2512_tnpA_AY509004.1	transposase	tnpA	0.0446701	0.0664441	10.9244	0	65.4474
1428_IS91_CP002783.1	insertion_element_IS91	IS91	0.395939	0.0657391	2.46596	0	64.753
1966_istA_AB270530.1	istA	istA	0.661929	0.0654476	5.0176	0	64.4658
2115_IS91_CP017105.1	insertion_element_IS91	IS91	0.637563	0.0646365	0.744791	0	63.667
2566_tnpA_CP009233.1	transposase	tnpA	0.137056	0.0641381	7.26024	0	63.176
1384_IS91_MOKM01000293.1	insertion_element_IS91	IS91	0.0477157	0.0636363	9.46063	0	62.6817
1242_tnpA_KP826710.1	transposase	tnpA	0.0680203	0.0635648	56.5091	0	62.6113
2426_istA_CP002879.1	istA	istA	0.412183	0.0633983	18.6085	0	62.4473
2042_tnpA_CAGT01000190.1	transposase	tnpA	0.630457	0.0633214	2.25001	0	62.3715
1930_tniA_FJ948173.1	tniA	tniA	0.192893	0.0631027	31.8082	0	62.1562
1233_tnpA_JN208880.1	transposase	tnpA	0.0456853	0.0627274	20.3388	0	61.7865
2106_IS91_MOKM01000200.1	insertion_element_IS91	IS91	0.0365482	0.0620258	7.91305	0	61.0955
635_int2_AY509004.1	integrase	int2	0.0263959	0.060921	55.8292	0	60.0072
325_IS91_LYDO01000032.1	insertion_element_IS91	IS91	0.0274112	0.0598077	9.71669	0	58.9106
1345_istA_AB270530.1	istA	istA	0.366497	0.0597458	12.1319	0	58.8496
1258_tnpA_AF087482.1	transposase	tnpA	0.66599	0.0596838	1.75324	0	58.7885
1156_ISCrsp1_LGIP01000002	ISCR	ISCrsp1	0.290355	0.0595425	9.22948	0	58.6494
39_rep7_16_repD_AY939911	plasmid	rep7	0.0446701	0.0594674	18.1516	0	58.5754
905_tnpA_CBZT010000036.1	transposase	tnpA	0.181726	0.058782	9.61141	0	57.9002
1201_tnpA_KU736874.1	transposase	tnpA	0.0172589	0.0583795	30.6611	0	57.5038
2302_tnpA_CP002881.1	transposase	tnpA	0.0426396	0.0582399	17.0399	0	57.3663
527_tnpA_CDAB01000007.1	transposase	tnpA	0.663959	0.0579677	1.13088	0	57.0982
661_IS10	IS10	IS10	0.0345178	0.0579359	12.4755	0	57.0668
2278_istB_AB270530.1	istB	istB	0.46802	0.0573905	4.546	0	56.5296
2696_tnpA_U14952.1	transposase	tnpA	0.0406091	0.057344	8.97191	0	56.4839
1868_tnpA_CP006582.1	transposase	tnpA	0.184772	0.0568963	2.89908	0	56.0428
134_repUS12__rep(pUB110)_AF181950	plasmid	repUS12	0.0964467	0.0566483	11.3085	0	55.7986
394_tnpA_KT862781.1	transposase	tnpA	0.0619289	0.0565053	12.5631	0	55.6577
1203_tnpA_LC075716.1	transposase	tnpA	0.15736	0.0559747	5.71472	0	55.1351
2772_tnpA_KF295828.1	transposase	tnpA	0.0365482	0.0546326	40.7154	0	53.8131
958_tnpA_CDAC01000056.1	transposase	tnpA	0.386802	0.0541186	20.3999	0	53.3068
804_tnpA_CDAC01000059.1	transposase	tnpA	0.233503	0.0538562	3.77249	0	53.0483
1797_tnpA_CBVQ010000068.1	transposase	tnpA	0.607107	0.0537721	1.08378	0	52.9655
747_IS91_HE970764.1	insertion_element_IS91	IS91	0.0101523	0.053448	23.2816	0	52.6463
2255_tnpA1_HE572590.1	transposase	tnpA1	0.631472	0.0528548	0.637979	0	52.062
561_tnpA_JORG01000037.1	transposase	tnpA	0.0832487	0.0522553	5.80524	0	51.4715
2592_IS91_CP002783.1	insertion_element_IS91	IS91	0.369543	0.0522152	1.10844	0	51.432
1151_IS621_NC009800	IS621	IS621	0.093401	0.05202	38.9399	0	51.2397
412_tnpA_FN806773.1	transposase	tnpA	0.614213	0.0519498	1.26223	0	51.1706
602_tnpA_AF491307.2	transposase	tnpA	0.577665	0.0518732	1.91829	0	51.0951
385_tniB_CP001856.1	tniB	tniB	0.152284	0.0514229	7.02548	0	50.6515
1640_tnpA_AF099014.1	transposase	tnpA	0.568528	0.0512068	1.11042	0	50.4387
2539_tnpA_AY177427.1	transposase	tnpA	0.0335025	0.0510674	13.8815	0	50.3014
2289_tnpA_EU402605.1	transposase	tnpA	0.0406091	0.050133	14.7522	0	49.381
501_tniA_GQ983559.1	tniA	tniA	0.146193	0.0498962	5.82129	0	49.1478
1702_IS91_AM902716.1	insertion_element_IS91	IS91	0.395939	0.0497123	0.952942	0	48.9666
2644_IS91_CP002447.1	insertion_element_IS91	IS91	0.388832	0.0488323	1.18576	0	48.0998
2709_tnpA_AGBU01000010.1	transposase	tnpA	0.0192893	0.0484949	26.4218	0	47.7675
1146_tnpA_KP826704.1	transposase	tnpA	0.0162437	0.048371	47.338	0	47.6454
729_tnpA_LC155908.1	transposase	tnpA	0.0954315	0.0482944	6.77704	0	47.57
402_tnpA_CP002474.1	transposase	tnpA	0.0913706	0.0481252	6.74769	0	47.4034
2575_IS91_AP014651.1	insertion_element_IS91	IS91	0.0213198	0.0479046	26.5712	0	47.1861
1138_tnpA_KJ588779.1	transposase	tnpA	0.337056	0.0477256	4.70763	0	47.0097
2741_tnpA_CTKN01000016.1	transposase	tnpA	0.0152284	0.0476088	45.8192	0	46.8947
2478_tnpA_AP012555.1	transposase	tnpA	0.22132	0.0474548	3.92725	0	46.743
271_tnpA_AB976569.1	transposase	tnpA	0.0274112	0.0473379	20.5216	0	46.6278
2445_tnpA_delta3_EU219534.1	transposase	tnpA	0.0477157	0.0473187	7.65048	0	46.6089
2321_tnpA_CP000352.1	transposase	tnpA	0.702538	0.0464307	0.550917	0	45.7343
281_ISCR-orf513_KJ186154.1	ISCR	ISCR-orf513	0.0324873	0.04631	8.7753	0	45.6154
1421_IS91_CP000539.1	insertion_element_IS91	IS91	0.15736	0.0461279	2.95192	0	45.436
371_tnpA_JF729197.1	transposase	tnpA	0.146193	0.0459204	6.89771	0	45.2316
2375_tnpA*_JX194160.1	transposase	tnpA	0.374619	0.0459173	1.829	0	45.2286
625_IS91_CP001383.1	insertion_element_IS91	IS91	0.0345178	0.0456241	38.6775	0	44.9397
1396_tnpA_LM676407.1	transposase	tnpA	0.276142	0.0452739	2.52024	0	44.5948
692_tnpA_HM560971.1	transposase	tnpA	0.20203	0.0448095	2.1509	0	44.1374
1452_tnpA_DQ147773.1	transposase	tnpA	0.484264	0.0444155	0.882259	0	43.7492
1437_IS91_CP002657.1	insertion_element_IS91	IS91	0.247716	0.0443219	3.1121	0	43.6571
2237_tnpA_ADNV01000324.1	transposase	tnpA	0.398985	0.0441246	1.38897	0	43.4627
439_tniB_GQ227991.1	tniB	tniB	0.119797	0.04383	4.42467	0	43.1726
123_repUS1__ORF(E.faeciumContig1258)_JDOE	plasmid	repUS1	0.0233503	0.04372	33.5567	0	43.0642
1637_tnpA_HM204990.1	transposase	tnpA	0.579695	0.043478	0.819491	0	42.8258
551_tnpA_CP000967.2	transposase	tnpA	0.471066	0.0433669	1.23726	0	42.7164
689_tnpA_KT601170.1	transposase	tnpA	0.0406091	0.0432941	11.9444	0	42.6447
1485_tnpA_KU666846.1	transposase	tnpA	0.0192893	0.0431824	41.9533	0	42.5347
715_tniB_EU591509.1	tniB	tniB	0.159391	0.0431035	4.44971	0	42.4569
6_rep1_6_repE(pTEF1)_AE016833	plasmid	rep1	0.0304569	0.0430085	18.6999	0	42.3634
1588_intI1_JN983048.1	integrase	intI1	0.0548223	0.0428465	8.74739	0	42.2038
2392_tnpA13_HG916826.1	transposase	tnpA13	0.198985	0.0427461	3.17759	0	42.1049
384_istB_CYCT01000079.1	istB	istB	0.118782	0.0426631	4.78153	0	42.0232
2043_IS91_CP000356.1	insertion_element_IS91	IS91	0.154315	0.0425297	13.6627	0	41.8917
2470_tnpA_CP000353.2	transposase	tnpA	0.523858	0.0424861	3.06431	0	41.8489
2583_tnpA_KR258747.1	transposase	tnpA	0.342132	0.0422478	1.82921	0	41.6141
1309_tnpA_KP834592.1	transposase	tnpA	0.0243655	0.0422226	9.60603	0	41.5893
2422_IS91_CBZU010000001.1	insertion_element_IS91	IS91	0.0142132	0.0419429	21.9985	0	41.3138
1607_IS91_CP005083.1	insertion_element_IS91	IS91	0.0284264	0.0419276	22.8844	0	41.2987
2670_tnpA_CP000352.1	transposase	tnpA	0.584772	0.0418476	1.73096	0	41.2199
1983_tnpA_JNMH01000096.1	transposase	tnpA	0.0497462	0.0416502	5.83619	0	41.0255
1180_tnpA_AM286690.1	transposase	tnpA	0.128934	0.0410074	7.28651	0	40.3923
585_tnpA_JN788266.1	transposase	tnpA	0.0670051	0.0408797	7.1633	0	40.2665
563_IS91_CP001918.1	insertion_element_IS91	IS91	0.0588832	0.0407109	29.7511	0	40.1002
320_tnpA_AJ534881.1	transposase	tnpA	0.0984772	0.0406303	3.09355	0	40.0209
1059_tnpA1_CP002879.1	transposase	tnpA1	0.476142	0.039918	0.726818	0	39.3192
2149_IS91_CP005084.1	insertion_element_IS91	IS91	0.258883	0.0399062	2.77023	0	39.3076
891_IS91_CP004393.1	insertion_element_IS91	IS91	0.374619	0.0395706	0.71847	0	38.977
1845_IS91_CP012199.1	insertion_element_IS91	IS91	0.24264	0.0393764	1.60025	0	38.7858
2719_tnpA_AB035483.1	transposase	tnpA	0.438579	0.039363	7.95779	0	38.7725
525_IS91_MNPD01000059.1	insertion_element_IS91	IS91	0.0456853	0.0391923	5.85182	0	38.6044
408_tnpA_FJ744165.1	transposase	tnpA	0.0385787	0.0387655	16.714	0	38.1841
549_tnpA_AP010803.1	transposase	tnpA	0.120812	0.0378997	10.6218	0	37.3312
1573_tnpA_CP000352.1	transposase	tnpA	0.246701	0.0369954	1.25495	0	36.4404
451_tnpA_KU254577.1	transposase	tnpA	0.278173	0.0369459	3.03199	0	36.3917
2523_tnpA1133_AY463797.8	transposase	tnpA1133	0.0477157	0.0368907	5.9733	0	36.3374
1199_istA_KU254577.1	istA	istA	0.114721	0.0363437	9.55856	0	35.7985
2804_tniA_KM877517.1	tniA	tniA	0.141117	0.0359142	3.62213	0	35.3755
835_tnpA_CCYP01000076.1	transposase	tnpA	0.256853	0.0358489	1.02998	0	35.3111
1739_IS91_CP000473.1	insertion_element_IS91	IS91	0.314721	0.0353476	1.48175	0	34.8174
2471_tnpA-1_AJ877225.1	transposase	tnpA-1	0.170558	0.0351649	3.80745	0	34.6375
1481_tnpA_EU693239.1	transposase	tnpA	0.0162437	0.0349445	8.55422	0	34.4203
1641_tnpA9_HG916826.1	transposase	tnpA9	0.0507614	0.0347985	9.0568	0	34.2765
446_tnpA_KF856624.1	transposase	tnpA	0.254822	0.0345001	5.84363	0	33.9826
1610_int3_HE616890.1	integrase	int3	0.481218	0.0343982	0.536701	0	33.8822
1347_tnpA_FLQY01000035.1	transposase	tnpA	0.309645	0.0342872	1.42559	0	33.7729
2789_tnpA5_HG916853.1	transposase	tnpA5	0.139086	0.0339216	6.94999	0	33.4127
2636_istA_JX194160.1	istA	istA	0.509645	0.0338019	2.67405	0	33.2949
267_qacEdelta_HM138673.1	qacEdelta	qacEdelta	0.0720812	0.0335707	3.52913	0	33.0672
536_tnpA_GU371926.1	transposase	tnpA	0.048731	0.0332568	8.15521	0	32.758
2746_tnpA_AM420293.1	transposase	tnpA	0.181726	0.0331981	30.996	0	32.7001
2562_tnpA_JX448550.1	transposase	tnpA	0.318782	0.0329538	3.61878	0	32.4595
2052_tnpA_CU459003.1	transposase	tnpA	0.640609	0.0328105	0.290918	0	32.3183
1910_IS91_CP000680.1	insertion_element_IS91	IS91	0.0923858	0.0326728	6.84866	0	32.1827
2796_tnpA5_CP002153.1	transposase	tnpA5	0.182741	0.0322197	5.03336	0	31.7364
748_tniA_JN566044.1	tniA	tniA	0.126904	0.031744	3.66757	0	31.2678
272_intI1_EF592570.1	integrase	intI1	0.0984772	0.0316987	2.37528	0	31.2232
627_tnpA_JN983042.1	transposase	tnpA	0.0213198	0.0316193	29.7111	0	31.145
1679_tnpA_CP006582.1	transposase	tnpA	0.245685	0.0314866	1.41248	0	31.0143
825_tnpA_U66917.2	transposase	tnpA	0.438579	0.0311367	1.2268	0	30.6696
1224_IS91_CP000831.1	insertion_element_IS91	IS91	0.275127	0.0309756	0.972437	0	30.5109
1295_tnpA_FCOX02000267.1	transposase	tnpA	0.0751269	0.030967	11.6924	0	30.5025
1121_tnpA_JX486125.1	transposase	tnpA	0.345178	0.0309129	3.48602	0	30.4492
642_tnpA-2_AJ877225.1	transposase	tnpA-2	0.295431	0.0307719	1.71574	0	30.3103
2594_IS91_CP002783.1	insertion_element_IS91	IS91	0.169543	0.0306506	1.9254	0	30.1908
330_tnpA_KP893385.1	transposase	tnpA	0.248731	0.0306245	4.3811	0	30.1651
2090_tnpA_JQ241792.1	transposase	tnpA	0.0253807	0.0302845	6.74054	0	29.8302
2673_IS91_MNDF01000012.1	insertion_element_IS91	IS91	0.228426	0.0300107	2.25205	0	29.5605
556_tnpA_JX421697.1	transposase	tnpA	0.372589	0.0299952	1.17735	0	29.5453
1483_tnpA1_LT608328.1	transposase	tnpA1	0.013198	0.0299148	7.29625	0	29.4661
1218_tnpA_AB985521.1	transposase	tnpA	0.0395939	0.029815	7.154	0	29.3678
2451_tnpA_JN106169.1	transposase	tnpA	0.230457	0.0294879	1.30723	0	29.0456
2047_IS91_CP005958.1	insertion_element_IS91	IS91	0.0071066	0.0292379	13.4084	0	28.7993
895_tnpA_FN806773.1	transposase	tnpA	0.558376	0.0290439	0.819441	0	28.6083
1878_tnpA_JX442974.1	transposase	tnpA	0.0071066	0.0287884	28.0935	0	28.3565
878_tnpA_KU059995.1	transposase	tnpA	0.0243655	0.0287765	10.8549	0	28.3449
964_tnpA_FMSH01000107.1	transposase	tnpA	0.0994924	0.028591	8.45318	0	28.1622
938_tnpA_BDLP01000034.1	transposase	tnpA	0.524873	0.028514	0.433258	0	28.0863
2714_tnpA_JEWB01000253.1	transposase	tnpA	0.0172589	0.0284208	8.11985	0	27.9945
2629_IS91_MLFK01000009.1	insertion_element_IS91	IS91	0.0385787	0.0284004	4.94376	0	27.9744
581_tnpA_CCYV01000085.1	transposase	tnpA	0.450761	0.0277955	0.495403	0	27.3786
1833_tnpA_JN849689.1	transposase	tnpA	0.0730964	0.0272193	4.42491	0	26.811
2362_tnpA_AJ250371.1	transposase	tnpA	0.255838	0.0271312	1.40641	0	26.7243
434_tnpA_KC170280.1	transposase	tnpA	0.412183	0.0266624	1.28131	0	26.2625
571_tnpA_KX710093.1	transposase	tnpA	0.26802	0.0263541	4.33511	0	25.9588
1525_tnpA_KU130294.1	transposase	tnpA	0.237563	0.0262899	4.17137	0	25.8956
2715_tnpA1_KF743818.1	transposase	tnpA1	0.0761421	0.0262846	4.96667	0	25.8904
2212_tnpA_AJ245804.1	transposase	tnpA	0.541117	0.0262245	0.320288	0	25.8312
2294_IS91_CP002449.1	insertion_element_IS91	IS91	0.0994924	0.0260847	1.4077	0	25.6934
831_tnpA_KF705206.1	transposase	tnpA	0.0984772	0.0259928	3.77594	0	25.6029
2556_tnpA_EU646207.1	transposase	tnpA	0.0182741	0.0258488	5.10957	0	25.4611
2099_tnpA_AP010805.1	transposase	tnpA	0.218274	0.0258139	7.32105	0	25.4267
1979_tnpA_JX077110.1	transposase	tnpA	0.0406091	0.0258012	6.01286	0	25.4141
2472_tnpA_JN106170.1	transposase	tnpA	0.183756	0.025719	1.75956	0	25.3332
1361_tnpA_CP001856.1	transposase	tnpA	0.358376	0.0256585	2.01868	0	25.2736
2704_tnpA(IS5)_AJ698325.1	transposase	tnpA(IS5)	0.211168	0.0256238	6.1527	0	25.2394
820_istA1_HG916826.1	istA1	istA1	0.115736	0.0255616	6.77636	0	25.1782
649_tnpA_CCYR01000042.1	transposase	tnpA	0.0832487	0.0253156	2.62525	0	24.9358
2693_IS91_MPUO01000145.1	insertion_element_IS91	IS91	0.0629442	0.0252886	5.93248	0	24.9093
1958_istA_KU130294.1	istA	istA	0.285279	0.0252676	5.20744	0	24.8886
1172_IS91_CP000539.1	insertion_element_IS91	IS91	0.135025	0.0250987	5.58764	0	24.7222
4_rep1_4_repE(orf17)_NC011140	plasmid	rep1	0.0162437	0.0250147	8.27532	0	24.6395
1897_IS91_MNRK01000014.1	insertion_element_IS91	IS91	0.0152284	0.0249376	12.4512	0	24.5636
1547_tnpA_U66917.2	transposase	tnpA	0.284264	0.0249005	1.87326	0	24.527
1335_tnpA1_FN597644.1	transposase	tnpA1	0.236548	0.0244055	12.7108	0	24.0394
638_tnpA_DQ361537.1	transposase	tnpA	0.00609137	0.0243663	23.5788	0	24.0008
36_rep7_13_rep(pSBK203)_U35036.1	plasmid	rep7	0.0274112	0.0243423	8.94634	0	23.9772
1860_tnpA1_JN648090.1	transposase	tnpA1	0.168528	0.0242223	4.09927	0	23.859
421_tnpA_KU167609.1	transposase	tnpA	0.190863	0.0241538	3.21039	0	23.7915
670_istA_CBVQ010000196.1	istA	istA	0.124873	0.0237488	3.00438	0	23.3925
2332_tnpA_AB183145.1	transposase	tnpA	0.013198	0.0233692	8.32212	0	23.0187
1871_tnpA_CP006582.1	transposase	tnpA	0.258883	0.0233055	1.18374	0	22.9559
237_IncQ2_1__FJ696404	plasmid	IncQ2	0.0862944	0.023165	1.08393	0	22.8175
1184_IS91_CP000490.1	insertion_element_IS91	IS91	0.234518	0.0230196	0.521486	0	22.6744
1240_tnpA*_JX194160.1	transposase	tnpA	0.380711	0.0229725	0.590093	0	22.6279
1613_tnpA_AGBB01000127.1	transposase	tnpA	0.0142132	0.0227071	14.3986	0	22.3665
2764_tnpA4_CP005961.1	transposase	tnpA4	0.0974619	0.0225258	3.951	0	22.1879
1875_istA5_LK391695.1	istA5	istA5	0.0598985	0.0224773	6.42068	0	22.1401
2570_tnpA_CCSD01000073.1	transposase	tnpA	0.643655	0.0224241	0.292419	0	22.0878
932_tnpA_AF109404.1	transposase	tnpA	0.372589	0.0222562	0.691699	0	21.9224
2341_tnpA_KX530813.1	transposase	tnpA	0.211168	0.0221625	12.6847	0	21.8301
1506_tnpA_KX118608.1	transposase	tnpA	0.0304569	0.0219102	17.6709	0	21.5816
769_tnpA_KX029332.1	transposase	tnpA	0.121827	0.0218504	5.73499	0	21.5227
2795_tniA_AGTD01000004.1	tniA	tniA	0.135025	0.0216377	2.56578	0	21.3131
347_istA_DQ125241.2	istA	istA	0.105584	0.0215908	2.57629	0	21.2669
765_tnpA_HE613569.1	transposase	tnpA	0.0243655	0.0215399	5.42819	0	21.2168
159_IncW_1__EF633507	plasmid	IncW	0.0284264	0.0213762	3.68896	0	21.0556
851_tnpA_CTJA01000058.1	transposase	tnpA	0.00913706	0.0212592	20.6769	0	20.9403
2344_istA13_LK391695.1	istA13	istA13	0.251777	0.0207403	1.51894	0	20.4292
824_ISCR-orf513__FJ012881.1	ISCR	ISCR-orf513	0.0263959	0.0205317	7.69254	0	20.2237
428_tnpA_JX077110.1	transposase	tnpA	0.0263959	0.0204737	4.78095	0	20.1666
2605_tnpA_JN106167.1	transposase	tnpA	0.120812	0.0204664	2.36148	0	20.1594
1186_tnpA_AJ870469.1	transposase	tnpA	0.426396	0.0203952	0.237317	0	20.0892
1615_IS91_CP000356.1	insertion_element_IS91	IS91	0.0903553	0.0202187	2.76733	0	19.9154
751_IS91_CP000539.1	insertion_element_IS91	IS91	0.151269	0.0201655	1.17909	0	19.863
721_qacEdelta_CP012682.1	qacEdelta	qacEdelta	0.0649746	0.0199945	1.56018	0	19.6946
2469_tnpA-2_HG916826.1	transposase	tnpA-2	0.132995	0.0198387	2.18326	0	19.5411
339_tnpA_FN806773.1	transposase	tnpA	0.463959	0.0198139	0.273147	0	19.5167
2563_tnpA_KU254577.1	transposase	tnpA	0.139086	0.0197583	3.71106	0	19.4619
1440_istB_KU130294.1	istB	istB	0.129949	0.0197049	4.98842	0	19.4094
1018_tniB_AM261760.1	tniB	tniB	0.210152	0.0196875	1.93298	0	19.3922
2004_tnpA_HF677572.1	transposase	tnpA	0.104569	0.0196572	2.96949	0	19.3623
838_tniA_EF107516.1	tniA	tniA	0.164467	0.0195798	1.03347	0	19.2861
2116_IS91_FN649418.1	insertion_element_IS91	IS91	0.0497462	0.0195762	4.93506	0	19.2826
2447_tnpA_KJ933392.1	transposase	tnpA	0.00406091	0.0193877	17.6576	0	19.0969
2801_tniB_KU254577.1	tniB	tniB	0.159391	0.0193337	1.26169	0	19.0437
1489_tniA_KX710093.1	tniA	tniA	0.162437	0.0193137	2.04749	0	19.024
746_tnpA_AJ863570.1	transposase	tnpA	0.516751	0.0189423	1.1326	0	18.6581
1260_tnpA_AY351675.1	transposase	tnpA	0.0822335	0.0188491	4.08787	0	18.5664
116_rep21_14_rep(pKH21)_EU350088.1	plasmid	rep21	0.022335	0.0186183	11.8029	0	18.339
2127_IS91_CP004393.1	insertion_element_IS91	IS91	0.212183	0.0185718	0.997249	0	18.2932
1308_tnpA_HE971709.1	transposase	tnpA	0.372589	0.0185625	0.308126	0	18.284
593_tnpA2_DQ126685.1	transposase	tnpA2	0.0923858	0.0184226	2.40358	0	18.1462
341_tnpA_KU130294.1	transposase	tnpA	0.0375635	0.0183271	4.14713	0	18.0522
1305_istB_EF107516.1	istB	istB	0.33198	0.0183256	0.728069	0	18.0507
1993_tnpA_AB576781.2	transposase	tnpA	0.0477157	0.0181968	3.93135	0	17.9239
904_tnpA_CP000353.2	transposase	tnpA	0.321827	0.0181538	3.06727	0	17.8815
1556_tnpA_LC075717.1	transposase	tnpA	0.340102	0.0180924	0.902881	0	17.821
552_tnpA_AJ344068.1	transposase	tnpA	0.130964	0.0179013	2.44383	0	17.6328
2331_tnpA_JF745030.2	transposase	tnpA	0.0446701	0.017856	2.66977	0	17.5882
1700_tnpA_HF545435.1	transposase	tnpA	0.0446701	0.0175847	2.33954	0	17.3209
481_tnpA_CBTV010000136.1	transposase	tnpA	0.0324873	0.017344	5.09812	0	17.0838
776_tniA_L29404.2	tniA	tniA	0.102538	0.0173294	2.34222	0	17.0694
2334_tnpA_KF753688.1	transposase	tnpA	0.0263959	0.0170725	6.98629	0	16.8164
2157_tnpA4_FJ948173.1	transposase	tnpA4	0.127919	0.0169967	2.58556	0	16.7417
1517_tnpA_AGFM01000122.1	transposase	tnpA	0.0994924	0.0169713	4.85704	0	16.7167
2738_tnpA_KU743384.1	transposase	tnpA	0.0203046	0.0169692	3.61307	0	16.7147
1728_istB3_LK391695.1	istB3	istB3	0.108629	0.0169471	2.68921	0	16.6928
854_IS91_LN997846.1	insertion_element_IS91	IS91	0.0324873	0.016946	4.38226	0	16.6918
1248_IS91_AP012304.1	insertion_element_IS91	IS91	0.142132	0.0169143	0.779346	0	16.6606
2430_tnpA_KF601686.2	transposase	tnpA	0.0365482	0.0168929	4.41297	0	16.6395
2147_ISCau1_NC012590	ISCau1	ISCau1	0.381726	0.0168913	1.06321	0	16.6379
2369_tnpA_AJ431260.1	transposase	tnpA	0.574619	0.0168489	0.300031	0	16.5961
511_IS91_CP002417.1	insertion_element_IS91	IS91	0.183756	0.01661	0.688103	0	16.3608
517_tnpA_U66917.2	transposase	tnpA	0.122843	0.0165597	2.39695	0	16.3113
1373_tnpA_CP006582.1	transposase	tnpA	0.136041	0.016521	0.88509	0	16.2731
2020_tnpA_FN806773.1	transposase	tnpA	0.362437	0.0163175	0.420467	0	16.0727
2103_IS91_CP009122.1	insertion_element_IS91	IS91	0.0284264	0.0162455	4.10249	0	16.0018
903_tnpA_JN106169.1	transposase	tnpA	0.0101523	0.0159761	5.37442	0	15.7364
1874_tnpA_JX843238.1	transposase	tnpA	0.035533	0.0159086	4.24536	0	15.67
1791_int2_AM902716.1	integrase	int2	0.154315	0.0158545	1.45829	0	15.6167
452_tnpA_AF052751.1	transposase	tnpA	0.313706	0.0158318	0.750635	0	15.5943
2706_tnpA_KX710093.1	transposase	tnpA	0.0609137	0.0157568	4.07392	0	15.5204
2049_IS91_CP002784.1	insertion_element_IS91	IS91	0.123858	0.0156249	5.27699	0	15.3905
993_tnpA_AF403298.1	transposase	tnpA	0.0751269	0.0155834	4.95232	0	15.3497
453_tnpA1B1-IS1068_LT599053.1	transposase	tnpA1B1-IS1068	0.0233503	0.0154999	4.99335	0	15.2674
1974_tnpA_KF295829.1	transposase	tnpA	0.0304569	0.0154976	4.30689	0	15.2651
389_tniA_LK391695.1	tniA	tniA	0.048731	0.015457	2.63531	0	15.2251
1033_tnpA_LC198842.1	transposase	tnpA	0.181726	0.0154258	3.14249	0	15.1945
5_rep1_5_CDS6(pRE25)_X92945	plasmid	rep1	0.013198	0.0154238	6.97408	0	15.1924
139_repUS17__rep(pKKS825)_FN377602.2	plasmid	repUS17	0.0182741	0.0152478	6.17312	0	15.0191
2148_IS91_CP002798.1	insertion_element_IS91	IS91	0.152284	0.0152293	0.742466	0	15.0008
70_rep14_3_ORF(pRI1)_EU327398	plasmid	rep14	0.0192893	0.0151638	7.34862	0	14.9364
494_tnpA_HE616910.2	transposase	tnpA	0.0598985	0.0149199	1.72382	0	14.6961
1914_IS91_MNUL01000105.1	insertion_element_IS91	IS91	0.37868	0.0148367	1.14667	0	14.6141
2760_tnpA_CDAE01000006.1	transposase	tnpA	0.326904	0.0148013	0.365204	0	14.5793
917_tnpA_CCYY01000001.1	transposase	tnpA	0.22132	0.0147771	0.494365	0	14.5554
26_rep7_3_CDS1(pCW7)_J03323	plasmid	rep7	0.0192893	0.0147055	6.13615	0	14.4849
2601_tnpA_KP987215.1	transposase	tnpA	0.0284264	0.014561	2.27968	0	14.3426
2626_tnpA_CP002474.1	transposase	tnpA	0.0659898	0.0145081	1.56527	0	14.2905
1120_tnpA_AF535086.1	transposase	tnpA	0.0345178	0.0144981	6.1527	0	14.2806
2731_tnpA_KU736874.1	transposase	tnpA	0.0172589	0.0144797	5.11412	0	14.2625
1098_tnpA_KX756453.1	transposase	tnpA	0.0263959	0.0144335	2.35243	0	14.217
370_tnpA_KP893385.1	transposase	tnpA	0.0152284	0.0143391	4.69653	0	14.124
1445_tnpA_CP000355.2	transposase	tnpA	0.164467	0.0143378	8.73692	0	14.1228
337_tnpA_KF295829.1	transposase	tnpA	0.057868	0.0142511	2.775	0	14.0373
2489_tnpA_EF682134.1	transposase	tnpA	0.0385787	0.0141368	2.10097	0	13.9248
479_tnpA_AP013357.1	transposase	tnpA	0.0598985	0.014083	3.30561	0	13.8718
1764_tnpA_X97015.1	transposase	tnpA	0.227411	0.0140575	0.505362	0	13.8467
246_Col(MG828)_1__NC_008486	plasmid	Col(MG828)	0.0294416	0.0139543	2.9211	0	13.745
2661_IS91_CP001831.1	insertion_element_IS91	IS91	0.160406	0.0138024	0.630984	0	13.5953
1952_tnpA_GQ160960.2	transposase	tnpA	0.179695	0.0136453	3.17387	0	13.4406
107_rep21_5_repRC(pGO1)_FM207042.1	plasmid	rep21	0.0243655	0.0135242	6.61863	0	13.3213
2750_tnpA_FIGH01000007.1	transposase	tnpA	0.0253807	0.0134192	3.82117	0	13.2179
1116_tnpA_BBSJ01000031.1	transposase	tnpA	0.048731	0.0134174	1.75342	0	13.2161
2291_IS91_CP002657.1	insertion_element_IS91	IS91	0.0984772	0.0133272	0.858827	0	13.1273
1142_tnpA2_HE798556.1	transposase	tnpA2	0.233503	0.0131866	0.357836	0	12.9888
2773_tnpA_JX194160.1	transposase	tnpA	0.224365	0.0131677	2.22385	0	12.9702
1638_tnpA_FJ948173.1	transposase	tnpA	0.311675	0.0131469	1.94768	0	12.9497
1642_tnpAIS50-A_KF056330.2	transposase	tnpAIS50-A	0.0497462	0.0131024	3.31513	0	12.9059
1251_IS91_CP000616.1	insertion_element_IS91	IS91	0.0436548	0.0130369	2.49962	0	12.8413
1544_tnpA_AF408195.1	transposase	tnpA	0.0172589	0.0129566	7.01764	0	12.7622
1665_IS91_CP001635.1	insertion_element_IS91	IS91	0.164467	0.0129404	0.775032	0	12.7463
2325_IS91_CP001392.1	insertion_element_IS91	IS91	0.148223	0.0129262	0.39779	0	12.7323
473_tniB_U67194.4	tniB	tniB	0.125888	0.0128489	1.3354	0	12.6562
2251_tnpA_FO117623.1	transposase	tnpA	0.111675	0.0128403	0.564548	0	12.6477
2576_tnpA_JN232517.1	transposase	tnpA	0.0274112	0.012805	2.08339	0	12.6129
1744_ISCR1_HG003695.1	ISCR	ISCR1	0.0527919	0.012755	3.51499	0	12.5637
268_tnpA_KM396300.1	transposase	tnpA	0.0263959	0.0125926	5.24006	0	12.4037
1589_IS91_CP002417.1	insertion_element_IS91	IS91	0.151269	0.012471	0.673348	0	12.2839
2336_tnpA_FJ715942.1	transposase	tnpA	0.0314721	0.0124156	2.21525	0	12.2294
1181_tnpA11_HG916826.1	transposase	tnpA11	0.106599	0.0123581	3.17004	0	12.1727
349_tnpA_JX041889.1	transposase	tnpA	0.0426396	0.0123121	2.88718	0	12.1274
1177_tnpA_JN106167.1	transposase	tnpA	0.0426396	0.0123102	1.01033	0	12.1255
1552_tnpA_CP002881.1	transposase	tnpA	0.0873096	0.0121067	2.52306	0	11.9251
1623_tnpA_CP011273.1	transposase	tnpA	0.185787	0.0120934	0.339794	0	11.912
926_tnpA2_AJ431260.1	transposase	tnpA2	0.267005	0.0119829	1.25885	0	11.8032
972_IS91_CP001349.1	insertion_element_IS91	IS91	0.11269	0.01179	0.550663	0	11.6131
1779_tnpA_KR066794.1	transposase	tnpA	0.0263959	0.0117648	3.37803	0	11.5883
1561_tnpA_AP010803.1	transposase	tnpA	0.117766	0.0117484	3.39064	0	11.5722
332_tniB_LC169579.1	tniB	tniB	0.0832487	0.0116654	1.97468	0	11.4904
2352_tnpA1-IS1068_AY849557.2	transposase	tnpA1-IS1068	0.0172589	0.0115992	4.01293	0	11.4252
2648_tnpA_KF682462.1	transposase	tnpA	0.236548	0.0115387	0.742493	0	11.3656
40_Rep7_17_repC(pS0385-1)_AM990993.1	plasmid	Rep7	0.022335	0.0114951	6.14285	0	11.3227
794_tnpA_JQ764731.1	transposase	tnpA	0.0365482	0.0114462	3.44551	0	11.2745
2553_tnpA_KC964606.1	transposase	tnpA	0.104569	0.0113892	1.44367	0	11.2184
910_tnpA_AB854326.1	transposase	tnpA	0.158376	0.0113808	3.29637	0	11.21
314_tnpA_CP002474.1	transposase	tnpA	0.0203046	0.0113805	3.46598	0	11.2098
1559_tnpA_HG322949.1	transposase	tnpA	0.0680203	0.0112034	0.885266	0	11.0354
645_tnpA_JFHO01000232.1	transposase	tnpA	0.193909	0.0111501	0.580673	0	10.9829
1654_tnpAB_CP000352.1	transposase	tnpAB	0.0456853	0.0111501	5.38888	0	10.9828
865_IS91_FN649418.1	insertion_element_IS91	IS91	0.0314721	0.0111396	4.02968	0	10.9725
2266_tnpA_LFUT01000004.1	transposase	tnpA	0.186802	0.01108	1.09899	0	10.9138
2443_tnpA_KC543497.1	transposase	tnpA	0.164467	0.0109877	2.60169	0	10.8229
29_rep7_6_ORF(pKH1)_SAU38656	plasmid	rep7	0.0162437	0.0109199	6.06202	0	10.7561
124_repUS2__repA(pBI143)_BFU30316	plasmid	repUS2	0.0314721	0.0108572	2.21287	0	10.6944
2007_tnpA_AF042490.4	transposase	tnpA	0.349239	0.0108143	0.200287	0	10.6521
2584_tnpA-1_HG916826.1	transposase	tnpA-1	0.0527919	0.0107425	1.55684	0	10.5814
423_IS91_CP017633.1	insertion_element_IS91	IS91	0.0111675	0.0106171	3.29435	0	10.4579
2717_tnpA_KM877517.1	transposase	tnpA	0.0111675	0.0106115	9.92807	0	10.4523
105_rep21_3_pS0385-3_AM990995.1	plasmid	rep21	0.0243655	0.0106052	5.71673	0	10.4461
1687_tnpA_LN879484.1	transposase	tnpA	0.0243655	0.0105939	2.53546	0	10.435
2713_tnpA_FM897214.1	transposase	tnpA	0.171574	0.0104611	1.26275	0	10.3041
1368_tnpA_JX486125.1	transposase	tnpA	0.0274112	0.0104387	2.39127	0	10.2822
2411_tnpA_EF222275.1	transposase	tnpA	0.233503	0.010413	1.94524	0	10.2568
974_IS91_CP002449.1	insertion_element_IS91	IS91	0.158376	0.0103206	0.333992	0	10.1657
2171_tnpA_GQ324956.1	transposase	tnpA	0.150254	0.0102533	1.50586	0	10.0995
1111_tnpA_FR854090.1	transposase	tnpA	0.215228	0.0102524	1.22136	0	10.0986
653_tnpA_KJ933392.1	transposase	tnpA	0.0426396	0.0101615	1.52765	0	10.0091
1149_tniB_ALDT01000214.1	tniB	tniB	0.0964467	0.0101084	0.56824	0	9.95678
578_tnpA_BX571965.1	transposase	tnpA	0.0994924	0.0100974	4.55751	0	9.94592
104_rep21_2_rep(pNVH01)_AJ512814.1	plasmid	rep21	0.0263959	0.0100861	5.90659	0	9.93479
2209_tnpA_JFHO01000247.1	transposase	tnpA	0.161421	0.0100647	0.464491	0	9.91369
242_ColRNAI_1__DQ298019	plasmid	ColRNAI	0.0446701	0.0100152	1.94479	0	9.86501
353_tniB_LN794248.1	tniB	tniB	0.138071	0.0100028	0.78464	0	9.8528
189_IncFIB(K)_1_Kpn3_JN233704	plasmid	IncFIB(K)	0.0253807	0.009937	2.79911	0	9.78794
1917_tnpA_AB262965.1	transposase	tnpA	0.0324873	0.00991586	4.13456	0	9.76712
1235_tnpA_AM286690.1	transposase	tnpA	0.048731	0.00981095	2.50642	0	9.66379
934_tnpA_AJ344068.1	transposase	tnpA	0.0852792	0.00975552	0.914952	0	9.60919
1787_tnpA_AP008932.1	transposase	tnpA	0.28934	0.00967535	1.18607	0	9.53022
372_tnpA_GU327621.1	transposase	tnpA	0.0233503	0.00953769	3.40957	0	9.39463
2501_tnpA_CP017672.1	transposase	tnpA	0.00812183	0.00948433	4.30047	0	9.34206
30_rep7_7_rep(pKH7)_NC002096	plasmid	rep7	0.0101523	0.00944945	6.19795	0	9.30771
1401_IS91_CP000616.1	insertion_element_IS91	IS91	0.0639594	0.00943594	1.48214	0	9.2944
2538_tnpA_LYPG01000010.1	transposase	tnpA	0.0263959	0.00935312	1.80588	0	9.21282
2548_tnpA_U75371.3	transposase	tnpA	0.0243655	0.00934618	2.17198	0	9.20599
803_tnpA_AM743169.1	transposase	tnpA	0.164467	0.00924936	1.43606	0	9.11062
1861_tnpA_FJ866609.1	transposase	tnpA	0.0253807	0.00918841	3.32662	0	9.05059
2059_IS91_MPUO01000154.1	insertion_element_IS91	IS91	0.0467005	0.00918145	1.40019	0	9.04372
1503_tnpA_KF719970.1	transposase	tnpA	0.13198	0.00917467	0.939242	0	9.03705
1985_tnpA_AY509004.1	transposase	tnpA	0.0639594	0.0091617	1.37731	0	9.02427
1531_tnpA_CP003565.1	transposase	tnpA	0.264975	0.00912599	0.443129	0	8.9891
782_IS91_CP007567.1	insertion_element_IS91	IS91	0.0284264	0.00908571	5.01448	0	8.94943
805_tnpA_FMRQ01000002.1	transposase	tnpA	0.0436548	0.00907264	2.40569	0	8.93655
1957_tnpA_FJ829469.1	transposase	tnpA	0.0294416	0.00903887	1.4699	0	8.90329
2094_tnpA_AB220949.1	transposase	tnpA	0.0558376	0.00895876	2.66466	0	8.82438
1706_tnpA_AF086815.2	transposase	tnpA	0.234518	0.00878039	0.324959	0	8.64868
959_IS91_AP014651.1	insertion_element_IS91	IS91	0.0812183	0.00874396	0.655907	0	8.6128
2666_IS91_CP005083.1	insertion_element_IS91	IS91	0.0426396	0.00868816	0.741178	0	8.55784
422_tnpA_JN048641.1	transposase	tnpA	0.080203	0.00868781	0.554902	0	8.5575
2695_tnpA_EU503121.1	transposase	tnpA	0.0609137	0.00867068	1.7889	0	8.54062
730_tnpA_KX117210.1	transposase	tnpA	0.035533	0.00862772	1.90707	0	8.4983
2585_IS91_MOIK01000173.1	insertion_element_IS91	IS91	0.0142132	0.00860302	2.58214	0	8.47397
2509_tnpA_GU371926.1	transposase	tnpA	0.0385787	0.0085803	1.55242	0	8.4516
1287_tnpA_JN788266.1	transposase	tnpA	0.0314721	0.00856537	1.95104	0	8.43689
1852_IS91_CP003380.1	insertion_element_IS91	IS91	0.0517766	0.00856422	1.6099	0	8.43575
978_tnpA_AF141323.1	transposase	tnpA	0.0406091	0.0084905	1.93966	0	8.36315
503_IS91_CP002738.1	insertion_element_IS91	IS91	0.0832487	0.00848692	2.19772	0	8.35962
2807_tniA_FN806773.1	tniA	tniA	0.315736	0.00846492	0.244984	0	8.33794
1117_tnpA_KJ933392.1	transposase	tnpA	0.0162437	0.00846197	1.84581	0	8.33504
1545_tnpA_CP013054.1	transposase	tnpA	0.0517766	0.00844436	0.999454	0	8.31769
1173_IS91_CP000618.1	insertion_element_IS91	IS91	0.0395939	0.00843255	1.9332	0	8.30606
1054_IS91_AAUJ02000001.1	insertion_element_IS91	IS91	0.0517766	0.00831586	1.6249	0	8.19112
2747_tnpA_Y13383.2	transposase	tnpA	0.230457	0.00828014	0.311878	0	8.15594
1090_tnpA_13_KU665641.1	transposase	tnpA	0.0101523	0.00827823	7.77017	0	8.15406
1182_tnpA_KP400525.1	transposase	tnpA	0.0263959	0.00825218	1.89727	0	8.1284
3_rep1_3_repR(pGB354)_U83488	plasmid	rep1	0.0152284	0.00821152	4.26925	0	8.08835
800_tnpA3_FR854064.1	transposase	tnpA3	0.253807	0.00821102	0.228573	0	8.08786
1692_tnpA_AP010806.1	transposase	tnpA	0.0903553	0.00818354	4.03338	0	8.06079
2232_tnpA_AMFJ01009517.1	transposase	tnpA	0.0456853	0.00817682	0.747318	0	8.05416
1673_tnpA_JEYC01000208.1	transposase	tnpA	0.00101523	0.00814821	8.02599	0	8.02599
1905_tnpA_FP885897.1	transposase	tnpA	0.264975	0.00814809	0.716192	0	8.02587
64_rep13_2_CDS39(pSSP1)_AP008935	plasmid	rep13	0.0152284	0.00813226	4.18472	0	8.01027
1456_tnpA_LT599584.1	transposase	tnpA	0.193909	0.00812744	3.32195	0	8.00553
2243_tnpA1_AY208917.2	transposase	tnpA1	0.0477157	0.00812001	0.81243	0	7.99821
417_IS91_MNPA01000063.1	insertion_element_IS91	IS91	0.0629442	0.00804277	0.837806	0	7.92213
2504_tnpA_EU366287.1	transposase	tnpA	0.233503	0.00803941	0.274439	0	7.91882
976_tnpA_CP013215.1	transposase	tnpA	0.035533	0.00801948	1.19634	0	7.89919
1387_tnpA_KP400525.1	transposase	tnpA	0.0192893	0.00800083	2.17631	0	7.88082
1137_tnpAIS5_KF719970.1	transposase	tnpAIS5	0.104569	0.00797497	0.86377	0	7.85535
1128_tnpA_JNFD01000045.1	transposase	tnpA	0.0873096	0.00793342	2.37185	0	7.81442
565_tnp-ISCR5b_AM849110.1	tnp-ISCR	tnp-ISCR5b	0.0690355	0.007902	1.27807	0	7.78347
2011_tnpA_JN106170.1	transposase	tnpA	0.022335	0.00790025	3.04182	0	7.78175
615_IS91_CP000618.1	insertion_element_IS91	IS91	0.084264	0.00782673	0.562866	0	7.70933
2745_tnpA1-IS981_AY849557.2	transposase	tnpA1-IS981	0.0192893	0.0077843	1.21803	0	7.66753
955_tnpA_JQ318854.1	transposase	tnpA	0.0304569	0.00777416	3.2242	0	7.65755
950_tnpA_CYCY01000048.1	transposase	tnpA	0.0649746	0.00777343	0.994068	0	7.65683
2030_tnpA_HQ730118.1	transposase	tnpA	0.0741117	0.00776658	0.977727	0	7.65008
66_rep13_4_rep(pKH13)_NC010426.1	plasmid	rep13	0.0121827	0.00774052	4.05816	0	7.62441
2517_IS91_CP001350.1	insertion_element_IS91	IS91	0.109645	0.00773128	0.493387	0	7.61531
2389_tnpA_FKRR01000002.1	transposase	tnpA	0.0345178	0.00772857	2.26827	0	7.61264
1816_qacEdelta_KJ504228.1	qacEdelta	qacEdelta	0.0121827	0.00771891	4.07039	0	7.60312
1835_tnpA_AY365053.1	transposase	tnpA	0.13401	0.00766883	0.428264	0	7.55379
67_rep13_5_rep(pMC524/MBM)_AJ312056.2	plasmid	rep13	0.0111675	0.0076601	4.70436	0	7.5452
699_tnpA_CYAM01000068.1	transposase	tnpA	0.0893401	0.00757834	2.31371	0	7.46467
2041_tnpA_AE007872.2	transposase	tnpA	0.204061	0.00756458	0.318015	0	7.45111
382_tnpA-2_AM261760.1	transposase	tnpA-2	0.0893401	0.00754626	1.15317	0	7.43307
1062_int2_BA000030.4	integrase	int2	0.163452	0.00753663	0.593217	0	7.42358
2689_tnpA_KX470419.1	transposase	tnpA	0.0426396	0.00749931	1.39359	0	7.38682
1285_tnpA_EU402605.1	transposase	tnpA	0.00507614	0.00748955	2.82295	0	7.37721
400_tnpA_KT378598.1	transposase	tnpA	0.269036	0.00745303	0.222519	0	7.34123
2603_tnpA_JX077110.1	transposase	tnpA	0.0152284	0.00743273	2.41713	0	7.32124
812_tnpA_CDAH01000040.1	transposase	tnpA	0.282234	0.00743021	0.307309	0	7.31876
1448_IS91_CP002449.1	insertion_element_IS91	IS91	0.0751269	0.00738914	0.809107	0	7.27831
2095_tnpA_CDAF01000046.1	transposase	tnpA	0.0913706	0.00736318	0.293831	0	7.25274
982_tnpA_JX296013.1	transposase	tnpA	0.0395939	0.00733131	1.09665	0	7.22134
508_tnpA_KU341381.1	transposase	tnpA	0.0142132	0.00729096	1.66057	0	7.1816
1394_istA11_LK391695.1	istA11	istA11	0.0294416	0.00726982	1.82879	0	7.16078
1110_tnpA_GU371928.1	transposase	tnpA	0.0314721	0.00721736	1.71535	0	7.1091
1176_tnpA_DQ164214.1	transposase	tnpA	0.0213198	0.0072084	2.85786	0	7.10027
1278_istA9_HG916826.1	istA9	istA9	0.0203046	0.00720764	2.79521	0	7.09952
1940_IS91_CP017242.1	insertion_element_IS91	IS91	0.071066	0.00719666	0.922753	0	7.08871
940_tnpA_AF086815.2	transposase	tnpA	0.103553	0.00715179	1.10026	0	7.04451
1830_tnpA_HE795043.1	transposase	tnpA	0.0213198	0.00714384	1.90796	0	7.03668
1023_tnpA_AY786981.1	transposase	tnpA	0.0629442	0.0071415	3.02392	0	7.03438
2169_IS91_CP002784.1	insertion_element_IS91	IS91	0.0883249	0.00712563	0.548295	0	7.01874
505_tnpA4_AF550679.1	transposase	tnpA4	0.0213198	0.00710966	1.60816	0	7.00301
1712_tnpA_CU459003.1	transposase	tnpA	0.148223	0.00710212	0.440602	0	6.99558
2421_IS91_MKEM01000335.1	insertion_element_IS91	IS91	0.0568528	0.00705654	1.67846	0	6.95069
2449_tnpA_AYLZ02000164.1	transposase	tnpA	0.071066	0.00703657	1.05754	0	6.93102
493_tnpA_ISSod1_AE014300.1	transposase	tnpA	0.0121827	0.00701978	1.86973	0	6.91448
1915_tnpA_CDAG01000005.1	transposase	tnpA	0.19797	0.00701258	0.403036	0	6.90739
646_tnpA_KU167609.1	transposase	tnpA	0.0345178	0.0069197	1.05045	0	6.8159
819_tnpA_KU254577.1	transposase	tnpA	0.407107	0.00689816	0.188028	0	6.79469
2549_tnpA_AIGS01000013.1	transposase	tnpA	0.0142132	0.00684689	1.5582	0	6.74419
2225_tnpA_JQ269335.1	transposase	tnpA	0.022335	0.00683261	0.851912	0	6.73012
282_IS91_CP000036.1	insertion_element_IS91	IS91	0.0213198	0.00681256	1.39019	0	6.71037
1403_tnpA_JN104632.1	transposase	tnpA	0.105584	0.00679159	1.3191	0	6.68971
2610_IS91_MKCZ01000133.1	insertion_element_IS91	IS91	0.0467005	0.006758	1.59384	0	6.65663
1480_tnpA_AF086815.2	transposase	tnpA	0.0416244	0.00675454	2.77066	0	6.65323
1275_tnpA_AB035324.1	transposase	tnpA	0.102538	0.0067148	0.54594	0	6.61408
2033_tnpA_AJ421424.1	transposase	tnpA	0.124873	0.00669681	0.931671	0	6.59636
1829_tnpA_AP014810.1	transposase	tnpA	0.337056	0.00666103	0.613302	0	6.56111
2528_tnpA_AY786982.1	transposase	tnpA	0.0761421	0.00662139	1.89642	0	6.52207
398_tnpA*_EU287476.1	transposase	tnpA	0.31269	0.00660763	0.250634	0	6.50851
2537_tnpAIS1_KF719970.1	transposase	tnpAIS1	0.0314721	0.00659807	0.951564	0	6.4991
1095_tniA_AM236084.1	tniA	tniA	0.119797	0.00657493	0.494593	0	6.47631
644_IS91_CP003742.1	insertion_element_IS91	IS91	0.190863	0.00650305	0.295832	0	6.40551
2196_tnpA_FJ859895.1	transposase	tnpA	0.0538071	0.00647824	1.35186	0	6.38106
1357_IS91_FCOK02000015.1	insertion_element_IS91	IS91	0.0558376	0.00646861	1.2051	0	6.37158
468_tnpA_AF051917.1	transposase	tnpA	0.0284264	0.00638706	3.05174	0	6.29125
1646_tnpA3_HG916826.1	transposase	tnpA3	0.0456853	0.0063816	0.618722	0	6.28587
951_tniB_JN106167.1	tniB	tniB	0.0700508	0.00633385	1.43486	0	6.23884
1898_IS91_AP012547.1	insertion_element_IS91	IS91	0.0771574	0.00633282	0.630675	0	6.23782
161_P1_alpha_BN000925	plasmid	P1	0.013198	0.00632087	2.19589	0	6.22605
1504_tnpA_KU736877.1	transposase	tnpA	0.0101523	0.00628951	3.36995	0	6.19517
1694_tnpA_EF577044.1	transposase	tnpA	0.0517766	0.00626157	0.572246	0	6.16764
2339_istA15_LK391695.1	istA15	istA15	0.0690355	0.00625468	1.9454	0	6.16086
2416_tnpA_CT573073.1	transposase	tnpA	0.0162437	0.00624796	0.860917	0	6.15424
1008_tnpA_CP002881.1	transposase	tnpA	0.0720812	0.00622469	0.936228	0	6.13132
280_tnpA_JF714412.2	transposase	tnpA	0.0284264	0.00619112	1.00543	0	6.09826
1693_IS91_CP001383.1	insertion_element_IS91	IS91	0.00406091	0.00617599	5.32416	0	6.08335
829_IS91_MOFD01000166.1	insertion_element_IS91	IS91	0.0406091	0.00614592	1.04223	0	6.05373
1753_IS91_CP000272.1	insertion_element_IS91	IS91	0.203046	0.00612534	0.208523	0	6.03346
766_IS91_CP000616.1	insertion_element_IS91	IS91	0.048731	0.00609109	0.477948	0	5.99973
1085_tnpA_AM420293.1	transposase	tnpA	0.0294416	0.00606276	5.40353	0	5.97182
2190_tnpA_JN412066.1	transposase	tnpA	0.0324873	0.00605237	1.00605	0	5.96159
1468_istA_CTRI01000001.1	istA	istA	0.247716	0.00603277	0.535016	0	5.94228
2687_IS91_CP019238.1	insertion_element_IS91	IS91	0.11269	0.00599677	1.09466	0	5.90682
68_rep14_1_CDS2(pEFNP1)_AB038522	plasmid	rep14	0.0111675	0.00599316	2.9825	0	5.90326
2776_tnpA_CP000352.1	transposase	tnpA	0.080203	0.00598689	0.567465	0	5.89708
1064_IS91_FCOG02000101.1	insertion_element_IS91	IS91	0.0741117	0.00598364	0.467262	0	5.89389
2105_tnpA_DQ473406.1	transposase	tnpA	0.035533	0.00597784	0.677884	0	5.88818
2752_tnpA_ALWR01000001.1	transposase	tnpA	0.0162437	0.00596168	2.48249	0	5.87225
1769_tnpA_AP010805.1	transposase	tnpA	0.0700508	0.00592826	0.6886	0	5.83934
2569_tnpA_KU356987.1	transposase	tnpA	0.035533	0.00591791	1.53273	0	5.82914
1888_IS91_AB616660.2	insertion_element_IS91	IS91	0.00406091	0.0059012	2.96129	0	5.81268
986_IS91_HE798385.1	insertion_element_IS91	IS91	0.0862944	0.00587485	0.432017	0	5.78673
1960_IS91_AAUJ02000001.1	insertion_element_IS91	IS91	0.0456853	0.00586432	0.772082	0	5.77636
2179_tnpA_CCYE01000037.1	transposase	tnpA	0.398985	0.00585167	0.121042	0	5.76389
1350_tnpA_KC561054.1	transposase	tnpA	0.209137	0.00582894	0.358916	0	5.7415
1977_tniB_JNFD01000038.1	tniB	tniB	0.0375635	0.00575632	1.23588	0	5.66998
1032_IS292_L29283	IS292	IS292	0.145178	0.00573941	0.314698	0	5.65332
2382_tnp-ISCR5_AM849110.1	tnp-ISCR	tnp-ISCR5	0.0365482	0.00571247	1.71448	0	5.62679
1751_int2_KM886863.1	integrase	int2	0.0071066	0.00569514	3.39253	0	5.60972
870_IS91_CP001635.1	insertion_element_IS91	IS91	0.0558376	0.00569273	0.417131	0	5.60734
2241_tnpA_EU366287.1	transposase	tnpA	0.0690355	0.00568701	0.381265	0	5.6017
1811_tnpA-3_AJ877225.1	transposase	tnpA-3	0.33401	0.00568158	0.459677	0	5.59636
931_tnpA_GQ258057.1	transposase	tnpA	0.0203046	0.00567557	2.15409	0	5.59043
411_tnpA_AM409516.1	transposase	tnpA	0.00913706	0.00566334	5.07314	0	5.57839
639_tnpA_JF785549.1	transposase	tnpA	0.0659898	0.00566219	1.24738	0	5.57725
936_tnpA_KC609323.1	transposase	tnpA	0.179695	0.00564793	0.347604	0	5.56321
2261_tniA_AB063332.1	tniA	tniA	0.0670051	0.00561733	1.28272	0	5.53307
1359_IS292_L29283	IS292	IS292	0.080203	0.00560482	0.347608	0	5.52075
684_tnpA_AB238971.1	transposase	tnpA	0.118782	0.00558927	0.923971	0	5.50543
2620_IS91_CP000690.1	insertion_element_IS91	IS91	0.0771574	0.00558139	0.339465	0	5.49767
2708_tnpA_KM877517.1	transposase	tnpA	0.0324873	0.00554107	1.08997	0	5.45795
727_IS91_CP002657.1	insertion_element_IS91	IS91	0.0619289	0.00552618	0.489505	0	5.44329
2028_tnpA_CP000354.2	transposase	tnpA	0.084264	0.00552173	0.571996	0	5.4389
583_IS91_CU928162.2	insertion_element_IS91	IS91	0.0284264	0.0055138	1.47665	0	5.43109
1912_IS91_CP003989.2	insertion_element_IS91	IS91	0.093401	0.00550767	0.338066	0	5.42506
1193_tnpA_JX424614.1	transposase	tnpA	0.0294416	0.00549686	1.1064	0	5.41441
1678_IS91_CP001392.1	insertion_element_IS91	IS91	0.0588832	0.00548077	0.554343	0	5.39856
333_tnpA_KP893385.1	transposase	tnpA	0.0294416	0.00546446	1.17409	0	5.38249
1444_IS91_CP001013.1	insertion_element_IS91	IS91	0.0406091	0.00544705	1.19159	0	5.36535
2010_tnpA_IS5_like_KR822246.1	transposase	tnpA	0.0263959	0.00543048	2.43311	0	5.34902
2769_tnpA_CP000354.2	transposase	tnpA	0.213198	0.00542328	0.652578	0	5.34193
1094_tnpA_CCRM01000135.1	transposase	tnpA	0.0913706	0.0053992	0.268187	0	5.31822
2510_tnpA_CANI01000054.1	transposase	tnpA	0.144162	0.00539013	1.20527	0	5.30927
1288_tnpA_DQ174113.1	transposase	tnpA	0.0335025	0.00534997	2.23054	0	5.26972
59_rep11_2_repA(pEF1071)_AF164559	plasmid	rep11	0.00507614	0.00534223	3.59603	0	5.2621
1825_tnpA1353_KJ541071.1	transposase	tnpA1353	0.0274112	0.00530517	1.403	0	5.22559
771_tnpA_ISKpn24_KR822247.1	transposase	tnpA	0.0446701	0.00528277	1.08423	0	5.20353
2572_IS91_AJLR01000152.1	insertion_element_IS91	IS91	0.132995	0.00527477	0.729548	0	5.19564
1174_IS91_CP001046.1	insertion_element_IS91	IS91	0.057868	0.0052398	0.388608	0	5.1612
1761_tnpA_HM370391.1	transposase	tnpA	0.0172589	0.00522395	1.3136	0	5.14559
1129_IS91_CP001715.1	insertion_element_IS91	IS91	0.013198	0.00520089	2.74083	0	5.12287
2078_tnpA_EF118171.1	transposase	tnpA	0.0152284	0.00519715	3.8194	0	5.1192
1239_tnpA_L48985.1	transposase	tnpA	0.0923858	0.00514214	0.675503	0	5.06501
1398_IS91_MKEM01000335.1	insertion_element_IS91	IS91	0.0538071	0.0051002	0.981508	0	5.0237
1823_tnpA_DQ257629.1	transposase	tnpA	0.152284	0.00510007	0.494916	0	5.02357
2783_tnpA_JQ837276.1	transposase	tnpA	0.0324873	0.00508981	0.832433	0	5.01347
2363_tnpA1_AJ245436.1	transposase	tnpA1	0.153299	0.00506855	0.204245	0	4.99252
1210_IS91_MNXU01000079.1	insertion_element_IS91	IS91	0.164467	0.00506422	0.261919	0	4.98826
1565_tnpA_JX442974.1	transposase	tnpA	0.0304569	0.00504602	1.45393	0	4.97033
2486_IS91_FKHA01000014.1	insertion_element_IS91	IS91	0.0162437	0.00500275	1.11075	0	4.92771
545_tnpA(ISnew)_AJ698325.1	transposase	tnpA(ISnew)	0.0162437	0.0049865	1.64582	0	4.9117
2372_tnpA_JX077110.1	transposase	tnpA	0.0213198	0.00498414	1.07443	0	4.90938
2686_IS91_CP000514.1	insertion_element_IS91	IS91	0.00913706	0.00498376	2.93824	0	4.90901
914_tnpA_JX570731.1	transposase	tnpA	0.0345178	0.00495547	0.732345	0	4.88114
1649_tnpA_KT225462.1	transposase	tnpA	0.0233503	0.00494739	1.52524	0	4.87317
533_tnpA_CBTV010000137.1	transposase	tnpA	0.209137	0.00494444	0.934669	0	4.87028
1514_IS91_CP002783.1	insertion_element_IS91	IS91	0.0873096	0.00494114	0.312834	0	4.86703
759_tnpA_CP000352.1	transposase	tnpA	0.13198	0.00488192	0.405005	0	4.80869
2466_IS91_CP002798.1	insertion_element_IS91	IS91	0.0517766	0.00487869	0.491744	0	4.80551
643_tnpA_KC958437.1	transposase	tnpA	0.00913706	0.0048621	1.13556	0	4.78916
1926_tniA_JNFD01000038.1	tniA	tniA	0.0385787	0.00485041	0.750877	0	4.77765
350_tnpA_CCYY01000041.1	transposase	tnpA	0.15533	0.00477916	0.271377	0	4.70747
414_tnpA_AL513383.1	transposase	tnpA	0.0436548	0.00476016	0.78805	0	4.68876
379_tnpA_KU743384.1	transposase	tnpA	0.0121827	0.0047582	1.54013	0	4.68683
2442_tnpA_12_KU665641.1	transposase	tnpA	0.0609137	0.00475329	1.19516	0	4.68199
2197_tnpA_AL954747.1	transposase	tnpA	0.245685	0.0047379	0.158419	0	4.66683
2514_IS91_CP000539.1	insertion_element_IS91	IS91	0.0324873	0.00473215	1.22784	0	4.66117
1399_IS91_DQ388534.1	insertion_element_IS91	IS91	0.0111675	0.00473147	1.24214	0	4.6605
2534_tnpA_LN899827.1	transposase	tnpA	0.142132	0.00471114	0.496362	0	4.64048
1447_tnpA_CP002291.1	transposase	tnpA	0.022335	0.00469573	1.80062	0	4.62529
2104_tnpA_CP000353.2	transposase	tnpA	0.0345178	0.00468491	1.77645	0	4.61464
2350_tnpA3_CDAZ01000010.1	transposase	tnpA3	0.0294416	0.00468482	1.28487	0	4.61455
2083_tnpA_CP003732.1	transposase	tnpA	0.084264	0.0046829	0.610215	0	4.61265
758_tnpA3_FR875157.1	transposase	tnpA3	0.326904	0.00467642	0.1238	0	4.60627
1730_IS91_CP001053.1	insertion_element_IS91	IS91	0.0365482	0.00467382	2.95291	0	4.60372
499_intI1_JX486125.1	integrase	intI1	0.0233503	0.0046687	1.33435	0	4.59867
2160_IS91_FO000002.1	insertion_element_IS91	IS91	0.0467005	0.00466636	0.387947	0	4.59637
2623_IS91_AM902716.1	insertion_element_IS91	IS91	0.0304569	0.00466007	1.37799	0	4.59017
1159_tnpA_DQ057986.1	transposase	tnpA	0.222335	0.0046246	0.198293	0	4.55523
466_IS91_CP001918.1	insertion_element_IS91	IS91	0.0192893	0.0046227	1.38893	0	4.55336
2305_IS91_CP005927.1	insertion_element_IS91	IS91	0.0233503	0.00460157	3.04099	0	4.53255
108_rep21_6_rep(pBMSa1)_AY541446.1	plasmid	rep21	0.0152284	0.00458403	2.29211	0	4.51526
313_tnpA_CT573071.1	transposase	tnpA	0.0121827	0.00458139	0.499584	0	4.51266
206_IncFII(pHN7A8)_1_pHN7A8_JN232517	plasmid	IncFII(pHN7A8)	0.0121827	0.00455536	2.21497	0	4.48703
1571_IS91_AZMI01000001.1	insertion_element_IS91	IS91	0.0416244	0.00454836	0.495929	0	4.48013
2525_tnpA_CP010516.1	transposase	tnpA	0.0588832	0.00454701	0.998836	0	4.4788
1578_tnpA_CP000646.1	transposase	tnpA	0.144162	0.00452167	0.215768	0	4.45384
2794_tniB_CP003566.1	tniB	tniB	0.101523	0.00450105	0.334998	0	4.43353
2163_IS91_HG530068.1	insertion_element_IS91	IS91	0.0152284	0.00447942	0.750904	0	4.41223
167_IncX1_1__EU370913	plasmid	IncX1	0.013198	0.00446606	1.21679	0	4.39906
1207_tnpA_JMNH01000090.1	transposase	tnpA	0.0213198	0.00444323	0.587914	0	4.37658
1854_IS91_CP001918.1	insertion_element_IS91	IS91	0.0233503	0.00438994	0.606774	0	4.32409
1409_tniB_AM993098.1	tniB	tniB	0.0944162	0.00438409	0.395824	0	4.31833
2299_IS91_CP012903.1	insertion_element_IS91	IS91	0.00913706	0.00436335	1.32924	0	4.2979
591_tnpA03_KJ721803.1	transposase	tnpA03	0.0192893	0.004353	1.70038	0	4.28771
321_tnpA_CCXZ01000015.1	transposase	tnpA	0.295431	0.00435285	0.114839	0	4.28756
1800_tnpA_FJ501215.1	transposase	tnpA	0.0873096	0.00433988	1.24771	0	4.27478
1122_tnpA_HM560971.1	transposase	tnpA	0.175635	0.0043293	0.479892	0	4.26436
1507_tnpA_KU736877.1	transposase	tnpA	0.0111675	0.0043204	0.885986	0	4.25559
438_tnpA_DQ126685.1	transposase	tnpA	0.108629	0.00431381	0.215709	0	4.24911
1052_tnpA3_CP002367.1	transposase	tnpA3	0.0111675	0.00428385	1.32399	0	4.21959
2737_tnpA_CP002881.1	transposase	tnpA	0.106599	0.00426695	0.228653	0	4.20294
2712_tnpA_FCNZ02000046.1	transposase	tnpA	0.0791878	0.00424037	0.460981	0	4.17676
2500_tnpA_HE646882.2	transposase	tnpA	0.0121827	0.00423722	2.36393	0	4.17366
63_rep13_1_ORF(pC194)_NC002013	plasmid	rep13	0.00812183	0.00423516	2.35218	0	4.17164
2112_IS91_CP002783.1	insertion_element_IS91	IS91	0.0558376	0.00418977	0.393058	0	4.12692
2161_IS91_LETO01000030.1	insertion_element_IS91	IS91	0.013198	0.00418506	1.16962	0	4.12228
1533_tnpA_FAVL01000073.1	transposase	tnpA	0.0213198	0.00416947	0.712401	0	4.10693
1124_tnpA_FN806773.1	transposase	tnpA	0.0781726	0.00415914	0.272207	0	4.09676
1582_tnpA_EF628292.1	transposase	tnpA	0.0852792	0.00413333	0.588464	0	4.07133
2249_tnpA1_HG916853.1	transposase	tnpA1	0.0477157	0.00412551	0.688149	0	4.06363
2580_tnpA_JN106175.1	transposase	tnpA	0.0121827	0.00411876	1.59221	0	4.05698
2728_tnpA_LT222315.1	transposase	tnpA	0.0873096	0.00411051	0.608818	0	4.04885
2271_tnpA_EU850412.1	transposase	tnpA	0.0203046	0.00409542	1.43323	0	4.03399
1317_tniB_AM236084.1	tniB	tniB	0.0690355	0.00405555	0.583157	0	3.99471
1101_tnpA_CTRJ01000004.1	transposase	tnpA	0.137056	0.00403528	0.371081	0	3.97475
609_IS91_CP002783.1	insertion_element_IS91	IS91	0.0538071	0.00403269	0.361904	0	3.9722
2014_tnpA_4_KU665641.1	transposase	tnpA	0.0883249	0.00401436	0.526895	0	3.95414
1676_tnpA_AF079317.1	transposase	tnpA	0.0446701	0.00398708	1.12383	0	3.92727
1995_tnpA_CP009111.1	transposase	tnpA	0.256853	0.00397712	0.204579	0	3.91746
633_tnpA_AMTK01000088.1	transposase	tnpA	0.0142132	0.00396575	0.800795	0	3.90626
2024_tnpA1_BX248356.1	transposase	tnpA1	0.00812183	0.00395116	1.491	0	3.89189
1662_IS91_CP000616.1	insertion_element_IS91	IS91	0.0375635	0.00394831	0.747979	0	3.88909
1092_tnpA_AMBZ01000002.1	transposase	tnpA	0.0619289	0.003911	0.554569	0	3.85234
2244_tnpA_KX243412.1	transposase	tnpA	0.0213198	0.00390216	1.86683	0	3.84362
2338_tnpA_EF628291.1	transposase	tnpA	0.048731	0.00387196	1.2476	0	3.81388
683_IS91_CP013729.1	insertion_element_IS91	IS91	0.035533	0.00385381	0.946352	0	3.796
1844_IS292_L29283	IS292	IS292	0.0670051	0.00385082	0.395427	0	3.79306
714_IS91_CP003150.1	insertion_element_IS91	IS91	0.0335025	0.00382686	0.429632	0	3.76946
2683_IS91_AP014611.1	insertion_element_IS91	IS91	0.0142132	0.0038158	1.34897	0	3.75856
2412_tnpA_AY607094.1	transposase	tnpA	0.0304569	0.0038147	0.361459	0	3.75748
920_tnpA_CP002880.1	transposase	tnpA	0.0426396	0.00381102	0.280812	0	3.75385
1798_tnpA_FP475957.1	transposase	tnpA	0.253807	0.00380089	0.192353	0	3.74388
2691_tnpA_KJ933392.1	transposase	tnpA	0.022335	0.00379969	0.624806	0	3.7427
863_qacEdelta_AF347074.1	qacEdelta	qacEdelta	0.0324873	0.00378701	0.488571	0	3.73021
197_p0111_1__AP010962	plasmid	p0111	0.0111675	0.00378177	1.34267	0	3.72505
458_tnpA_KC609323.1	transposase	tnpA	0.315736	0.00377558	0.0814476	0	3.71894
443_tnpA_CT573071.1	transposase	tnpA	0.0101523	0.0037626	0.552827	0	3.70616
717_tnpA4_HE578058.1	transposase	tnpA4	0.0243655	0.00375606	0.93489	0	3.69972
15_rep4_3_ORF(pMBB1)_EFU26268	plasmid	rep4	0.013198	0.00374053	2.29468	0	3.68442
331_tnpA_AY208917.2	transposase	tnpA	0.141117	0.00373473	0.685283	0	3.6787
1269_IS91_CP002783.1	insertion_element_IS91	IS91	0.0558376	0.00373248	0.302579	0	3.67649
193_IncP(6)_1__JF785550	plasmid	IncP(6)	0.0274112	0.00371822	0.369506	0	3.66244
2450_tnpA_GU371929.1	transposase	tnpA	0.0101523	0.00371725	0.865465	0	3.6615
2213_tnpA_AF535087.1	transposase	tnpA	0.0213198	0.00371657	0.754731	0	3.66082
2202_tnpA_Y10102.1	transposase	tnpA	0.0182741	0.00370451	1.47032	0	3.64894
1714_IS91_FCOK02000015.1	insertion_element_IS91	IS91	0.0304569	0.00366888	0.357566	0	3.61385
1070_intI1_JN983045.1	integrase	intI1	0.0284264	0.00366391	0.844135	0	3.60895
1538_tnpA_KU736879.1	transposase	tnpA	0.0263959	0.00360407	0.690919	0	3.55
2303_delta-tnpA_HF545435.1	transposase	delta-tnpA	0.00812183	0.00360047	1.10887	0	3.54647
1513_tniB_AB063332.1	tniB	tniB	0.0954315	0.00359651	0.395824	0	3.54256
2734_tnpA_JN106164.1	transposase	tnpA	0.270051	0.0035849	0.0844673	0	3.53113
586_tnpA2B2-ISLL6_AY849557.2	transposase	tnpA2B2-ISLL6	0.0203046	0.00357553	1.0643	0	3.5219
2671_tnpA_EU636005.1	transposase	tnpA	0.0071066	0.00355852	0.955027	0	3.50514
323_tnpA_KU682281.1	transposase	tnpA	0.0375635	0.00354418	0.517583	0	3.49102
386_tnpA_JX077110.1	transposase	tnpA	0.0263959	0.00351965	0.767553	0	3.46686
2265_tnpA_JEXJ01000286.1	transposase	tnpA	0.00812183	0.00349764	1.229	0	3.44517
1608_IS91_AJHK02000009.1	insertion_element_IS91	IS91	0.0375635	0.00348846	0.498873	0	3.43614
1965_tnpA1_CXOJ01000027.1	transposase	tnpA1	0.154315	0.00344442	0.562895	0	3.39276
387_tnpA_JEXN01000001.1	transposase	tnpA	0.00609137	0.00343546	1.0892	0	3.38393
1432_IS91_CP000316.1	insertion_element_IS91	IS91	0.0324873	0.00342307	0.709381	0	3.37173
2081_tnpA_JX077110.1	transposase	tnpA	0.0243655	0.00339451	0.754694	0	3.34359
2051_tnpA_KU167609.1	transposase	tnpA	0.022335	0.00337281	0.644105	0	3.32222
2002_tnpA_AF072896.1	transposase	tnpA	0.141117	0.00336766	0.201031	0	3.31715
2076_tnpA27_HG918041.1	transposase	tnpA27	0.0832487	0.00336368	0.279187	0	3.31322
1923_tnpA_JN106171.1	transposase	tnpA	0.105584	0.00336064	0.36299	0	3.31023
672_tnpA_FIKS01000003.1	transposase	tnpA	0.0152284	0.00335612	0.757255	0	3.30577
2782_tnpA_JMNZ01000214.1	transposase	tnpA	0.0071066	0.00334445	0.93638	0	3.29429
1213_IS91_CP005930.1	insertion_element_IS91	IS91	0.0162437	0.0033261	1.30677	0	3.2762
1147_tnpA_FQ311873.1	transposase	tnpA	0.108629	0.00332145	0.205198	0	3.27163
103_rep21_1_rep(pWBG754)_GQ900396.1	plasmid	rep21	0.013198	0.0032954	1.44117	0	3.24597
1371_tnpA_AF232004.3	transposase	tnpA	0.093401	0.00329323	0.243924	0	3.24383
506_tnpA_AY327575.2	transposase	tnpA	0.250761	0.00327719	0.285938	0	3.22803
51_rep10_2_CDS1(pIM13)_M13761	plasmid	rep10	0.0121827	0.00326329	0.853843	0	3.21434
1263_tnpA_AE014299.2	transposase	tnpA	0.00913706	0.00326082	2.00851	0	3.21191
1522_tnpA_AY327575.2	transposase	tnpA	0.0670051	0.0032249	0.69193	0	3.17652
2183_tnpA_JQ764731.1	transposase	tnpA	0.0121827	0.00321035	1.34923	0	3.16219
247_ColpVC_1__JX133088	plasmid	ColpVC	0.0101523	0.00316412	2.35793	0	3.11666
2432_tnpA_AB238971.1	transposase	tnpA	0.0365482	0.00314362	0.559066	0	3.09646
1716_tnpA_AY821803.1	transposase	tnpA	0.235533	0.00311316	0.222836	0	3.06646
1312_tniA_AJ304453.1	tniA	tniA	0.0690355	0.00309682	0.360749	0	3.05036
2248_tnpA_KU961660.2	transposase	tnpA	0.0162437	0.00308317	1.25069	0	3.03693
308_tnpA_AM234722.1	transposase	tnpA	0.0192893	0.00308151	0.829235	0	3.03529
2663_IS91_CP005188.1	insertion_element_IS91	IS91	0.0446701	0.00306801	0.400545	0	3.02199
1992_tnpA_7_CP014358.1	transposase	tnpA	0.0233503	0.00305697	0.817833	0	3.01112
2121_IS91_CP002783.1	insertion_element_IS91	IS91	0.035533	0.00305649	0.551315	0	3.01065
2742_tnpA_KR055667.1	transposase	tnpA	0.0213198	0.00304725	1.46855	0	3.00154
2167_tnpA_CBTJ020000114.1	transposase	tnpA	0.184772	0.00303173	0.144425	0	2.98625
1179_IS91_AP014580.1	insertion_element_IS91	IS91	0.0416244	0.00302439	0.361005	0	2.97902
2723_IS292_L29283	IS292	IS292	0.0304569	0.00300174	0.663809	0	2.95672
2257_tnpA-IS683_KP347127.1	transposase	tnpA-IS683	0.0243655	0.00296369	0.659397	0	2.91924
773_IS91_CP001918.1	insertion_element_IS91	IS91	0.0304569	0.00295186	0.645781	0	2.90758
1499_tnpA_L14931.1	transposase	tnpA	0.0781726	0.00295185	0.484095	0	2.90758
1484_tnpA10_HQ840942.1	transposase	tnpA10	0.0253807	0.00294128	1.0343	0	2.89716
1827_tnpA_KF743817.1	transposase	tnpA	0.0243655	0.00291947	1.0041	0	2.87568
1049_tnpA_HF565366.1	transposase	tnpA	0.0548223	0.00290968	0.665595	0	2.86604
60_rep11_3_rep(pEFR)_AF511037	plasmid	rep11	0.00913706	0.00288634	1.06773	0	2.84305
1415_tniB_AECL01000076.1	tniB	tniB	0.0680203	0.00288587	0.200134	0	2.84258
1523_tnpA1_JFHO01000231.1	transposase	tnpA1	0.212183	0.0028833	0.160848	0	2.84005
620_tnpA_JFCD01000189.1	transposase	tnpA	0.0111675	0.00288268	0.818652	0	2.83944
1431_IS91_AIEX01000012.1	insertion_element_IS91	IS91	0.0233503	0.00287856	0.581357	0	2.83538
652_tnpA_Y09450.1	transposase	tnpA	0.228426	0.00287611	0.261488	0	2.83296
2490_tnpA_FO681494.1	transposase	tnpA	0.255838	0.00286939	0.130316	0	2.82635
125_repUS3__repM200(pBM200)_DQ437521	plasmid	repUS3	0.0862944	0.00285201	0.224734	0	2.80923
2669_tnpA_JX442974.1	transposase	tnpA	0.0162437	0.00284245	1.14191	0	2.79981
2431_tnpA3_CP002151.1	transposase	tnpA3	0.179695	0.00281508	0.129198	0	2.77285
1602_tnpA_4_KU665642.1	transposase	tnpA	0.013198	0.00280919	1.77311	0	2.76705
1267_tnpA_FO082821.1	transposase	tnpA	0.156345	0.00280235	0.13056	0	2.76031
2452_tnpA_CCAE010000033.1	transposase	tnpA	0.218274	0.00280167	0.126405	0	2.75964
2424_tnpA_CP000353.2	transposase	tnpA	0.0548223	0.00276273	0.546349	0	2.72129
2484_qacEdelta_KF921520.1	qacEdelta	qacEdelta	0.00913706	0.00272946	0.755174	0	2.68851
1727_tnpA1_HG916826.1	transposase	tnpA1	0.0162437	0.00272927	0.469039	0	2.68833
34_rep7_11_repD(pTZ4)_NC010111.1	plasmid	rep7	0.0071066	0.00267861	1.52039	0	2.63843
77_rep16_6_unknown(SAP071A)_GQ900485.1	plasmid	rep16	0.0152284	0.00267053	0.518402	0	2.63047
1701_IS91_AJHK02000009.1	insertion_element_IS91	IS91	0.048731	0.00266986	0.321363	0	2.62981
2480_tnpA_KU254577.1	transposase	tnpA	0.0517766	0.00265699	0.497106	0	2.61714
777_tnpA-5_AJ877225.1	transposase	tnpA-5	0.0071066	0.00264967	0.950568	0	2.60992
628_tnpA_AY297781.1	transposase	tnpA	0.175635	0.00264799	0.13625	0	2.60827
2205_tnpA_KX029331.1	transposase	tnpA	0.0852792	0.00263864	0.813791	0	2.59906
836_tnpA_AE014299.2	transposase	tnpA	0.0121827	0.0026191	1.84262	0	2.57982
1143_tnpA_FR820585.1	transposase	tnpA	0.210152	0.00260657	0.123923	0	2.56747
78_rep16_7_rep(pBORa53)_AY917098.1	plasmid	rep16	0.0121827	0.00260084	0.727582	0	2.56183
554_tnpAcp1_FJ187822.1	transposase	tnpAcp1	0.0192893	0.00259925	0.64585	0	2.56026
2079_tnpA_KJ933392.1	transposase	tnpA	0.0192893	0.00258433	0.538739	0	2.54557
992_tnpA_CP000354.2	transposase	tnpA	0.0781726	0.00256862	0.313241	0	2.53009
489_tnpA_FN806773.1	transposase	tnpA	0.137056	0.00255522	0.12027	0	2.51689
477_tnpA_AM258965.2	transposase	tnpA	0.0233503	0.00255477	0.771031	0	2.51645
860_tnpA_AE014299.2	transposase	tnpA	0.0071066	0.00254158	1.76506	0	2.50346
629_tnpA_AF130439.1	transposase	tnpA	0.022335	0.002512	0.410735	0	2.47432
2182_tnpA_CP007448.1	transposase	tnpA	0.0385787	0.00250057	0.897534	0	2.46306
587_IS91_AVVC01000064.1	insertion_element_IS91	IS91	0.0121827	0.00249733	0.692178	0	2.45987
868_tnpA_JX077110.1	transposase	tnpA	0.0111675	0.00248538	1.29653	0	2.4481
2557_tnpA_CDNB01000043.1	transposase	tnpA	0.0649746	0.00246891	0.21302	0	2.43187
346_tniA_Y17897.1	tniA	tniA	0.0619289	0.00246648	0.274841	0	2.42948
1332_tnpA_AM491042.1	transposase	tnpA	0.0324873	0.00246026	0.412865	0	2.42335
1604_int2_FR824043.1	integrase	int2	0.0162437	0.00245274	0.511818	0	2.41595
682_tniA_CTRJ01000005.1	tniA	tniA	0.0791878	0.0024481	0.183466	0	2.41138
174_IncFII(Yp)_1_Yersenia_CP000670	plasmid	IncFII(Yp)	0.00913706	0.00244514	1.19851	0	2.40846
702_tnpA_DQ517526.1	transposase	tnpA	0.0233503	0.00243655	0.478198	0	2.4
176_IncHI2A_1__BX664015	plasmid	IncHI2A	0.00812183	0.00242998	1.01959	0	2.39353
2292_IS91_CP007448.1	insertion_element_IS91	IS91	0.013198	0.00242579	0.875755	0	2.3894
1553_tnpA_EF614235.1	transposase	tnpA	0.0609137	0.00242196	0.244268	0	2.38563
997_tnpA_AF342826.1	transposase	tnpA	0.0507614	0.00241944	0.32805	0	2.38315
2505_IS91_CP000514.1	insertion_element_IS91	IS91	0.00507614	0.00241294	1.53243	0	2.37674
2485_istA17_LK391695.1	istA17	istA17	0.080203	0.00240075	0.212448	0	2.36474
2124_IS91_CP001281.2	insertion_element_IS91	IS91	0.0172589	0.00239952	0.443468	0	2.36353
694_IS91_AE014073.1	insertion_element_IS91	IS91	0.0121827	0.00238114	0.44079	0	2.34542
592_tnpA1B1-ISLL6_AY849557.2	transposase	tnpA1B1-ISLL6	0.00913706	0.00237079	2.09235	0	2.33523
2781_tnpA_CP009998.1	transposase	tnpA	0.0142132	0.00236477	0.899221	0	2.3293
793_tnpA_AE014299.2	transposase	tnpA	0.00913706	0.00236194	0.658083	0	2.32651
135_repUS13__CDS1(pUSA01)_NC007790	plasmid	repUS13	0.0152284	0.00235745	0.612342	0	2.32209
1808_IS91_CP000698.1	insertion_element_IS91	IS91	0.0507614	0.00234321	0.628567	0	2.30806
1250_IS91_JRFO01000004.1	insertion_element_IS91	IS91	0.0324873	0.00233674	0.277855	0	2.30169
2349_tnpA_JEVW01000090.1	transposase	tnpA	0.00609137	0.00233297	1.06804	0	2.29798
82_rep19_1_CDS45(pLEW6932)_NC009130	plasmid	rep19	0.00812183	0.0023289	1.52678	0	2.29397
1022_tniA_CCES01000002.1	tniA	tniA	0.0284264	0.00230502	0.449282	0	2.27044
1105_tnpA_HE577330.1	transposase	tnpA	0.161421	0.00230463	0.116667	0	2.27006
1135_tnpA_JX570731.1	transposase	tnpA	0.0182741	0.00229321	0.315553	0	2.25881
1680_tnpA_CT573071.1	transposase	tnpA	0.0101523	0.00228446	0.358105	0	2.2502
2692_tnpA_KU130294.1	transposase	tnpA	0.0629442	0.00227931	0.239492	0	2.24512
1886_IS91_CP005188.1	insertion_element_IS91	IS91	0.0243655	0.00227357	0.334167	0	2.23946
2735_tnpA_HE616891.1	transposase	tnpA	0.116751	0.00227051	0.31067	0	2.23645
1042_IS91_CP000473.1	insertion_element_IS91	IS91	0.0324873	0.00225978	0.274906	0	2.22588
58_rep11_1_repA(pB82)_AB178871	plasmid	rep11	0.00507614	0.00225756	0.836616	0	2.2237
1961_IS91_CP002449.1	insertion_element_IS91	IS91	0.0121827	0.00224911	0.883995	0	2.21537
2608_tnpA_AM749812.1	transposase	tnpA	0.0446701	0.00224399	0.443062	0	2.21033
2688_tnpA_HG322949.1	transposase	tnpA	0.0243655	0.00223954	0.415152	0	2.20594
1093_tnpA_LC198842.1	transposase	tnpA	0.0538071	0.00222814	0.341065	0	2.19472
1726_tnpA_JN695267.1	transposase	tnpA	0.0507614	0.00221238	0.3809	0	2.17919
1010_tnpA_AJ233397.3	transposase	tnpA	0.0741117	0.00221095	0.214194	0	2.17778
148_IncHI2_1__BX664015	plasmid	IncHI2	0.0071066	0.00221014	0.948305	0	2.17699
2681_IS91_AE005674.2	insertion_element_IS91	IS91	0.0101523	0.00220422	0.671203	0	2.17115
1519_tnpA_EU503121.1	transposase	tnpA	0.0598985	0.00219873	0.21708	0	2.16575
1385_IS91_MPUM01000119.1	insertion_element_IS91	IS91	0.0467005	0.00218801	0.221831	0	2.15519
365_IS91_MLZI01000057.1	insertion_element_IS91	IS91	0.00812183	0.0021877	0.549815	0	2.15489
569_tniA_CP000353.2	tniA	tniA	0.0395939	0.00218148	0.274719	0	2.14876
1902_tnpA_6_KU665641.1	transposase	tnpA	0.0111675	0.00217849	0.945709	0	2.14582
1633_tnpA_ISSod6_AE014300.1	transposase	tnpA	0.00507614	0.00217528	0.661454	0	2.14265
785_tnpA_AF151431.1	transposase	tnpA	0.0690355	0.00217302	0.469893	0	2.14043
2491_tnpA_KX356458.1	transposase	tnpA	0.0375635	0.00217247	0.532658	0	2.13988
1971_tniB_CCES01000002.1	tniB	tniB	0.0233503	0.00216492	0.657536	0	2.13245
977_tnpA_AB025195.1	transposase	tnpA	0.0274112	0.0021645	0.35197	0	2.13203
291_tnpA_KJ511462.1	transposase	tnpA	0.0213198	0.00214676	0.374296	0	2.11455
662_tnpA_AJ251307.2	transposase	tnpA	0.0203046	0.00214354	0.715777	0	2.11139
1266_tniB_EU306744.1	tniB	tniB	0.0649746	0.00213356	0.190283	0	2.10156
1876_tnpA_AY305378.1	transposase	tnpA	0.0761421	0.00212851	0.215166	0	2.09658
2154_IS91_AJHK02000009.1	insertion_element_IS91	IS91	0.0324873	0.00212543	0.224888	0	2.09355
2596_IS91_CP000503.1	insertion_element_IS91	IS91	0.00507614	0.00212375	1.20206	0	2.0919
90_rep19_9_repA(AP071A)_GQ900485.1	plasmid	rep19	0.0152284	0.00211221	0.562141	0	2.08053
318_tnpA_AE014299.2	transposase	tnpA	0.00913706	0.00210545	0.670308	0	2.07387
1518_IS292_L29283	IS292	IS292	0.0263959	0.00210466	0.480004	0	2.07309
2185_tnpA_CP003204.1	transposase	tnpA	0.172589	0.00210035	0.23184	0	2.06884
1302_tniA_CP008706.1	tniA	tniA	0.0101523	0.00209589	0.675616	0	2.06445
739_tnpA_FQ482074.1	transposase	tnpA	0.0182741	0.00209364	0.410536	0	2.06224
405_tnpA_ISSod6_AE014300.1	transposase	tnpA	0.00507614	0.00208981	0.618645	0	2.05846
319_tnpA_ISSod3_AE014300.1	transposase	tnpA	0.00609137	0.0020881	0.617916	0	2.05677
1271_tniB_CP002152.1	tniB	tniB	0.0680203	0.00208329	0.222651	0	2.05204
2749_tnpA_JEWH01000133.1	transposase	tnpA	0.00101523	0.002083	2.05176	0	2.05176
2091_tnpA_AM260957.1	transposase	tnpA	0.0121827	0.00207841	0.43419	0	2.04723
1548_tnpA_FCOK02000138.1	transposase	tnpA	0.0741117	0.00207517	0.367153	0	2.04404
650_tnpA3B3-ISLL6_AY849557.2	transposase	tnpA3B3-ISLL6	0.0142132	0.0020669	1.62724	0	2.0359
1781_tnpA_HE798556.1	transposase	tnpA	0.204061	0.00206621	0.0775415	0	2.03521
604_IS91_CP001052.1	insertion_element_IS91	IS91	0.0446701	0.00205409	0.356788	0	2.02328
2652_IS91_CP003235.1	insertion_element_IS91	IS91	0.0598985	0.0020511	0.510108	0	2.02033
1100_IS91_CP000690.1	insertion_element_IS91	IS91	0.022335	0.00203896	0.679251	0	2.00838
2146_IS91_AGTS01000028.1	insertion_element_IS91	IS91	0.0274112	0.00203645	0.266302	0	2.0059
1648_tnpA_CP000354.2	transposase	tnpA	0.0263959	0.00202427	0.614619	0	1.9939
495_tnpA_ISSod13_AE014300.1	transposase	tnpA	0.0324873	0.00200769	0.494155	0	1.97757
401_tnpA_KX243414.1	transposase	tnpA	0.022335	0.00200735	0.574783	0	1.97724
961_tnpA_JFCC01000030.1	transposase	tnpA	0.00609137	0.00200728	1.18928	0	1.97717
797_tnpA_EF469735.1	transposase	tnpA	0.17868	0.00200687	0.174437	0	1.97676
2206_tnpA_CAHS01000016.1	transposase	tnpA	0.0335025	0.0019699	0.228339	0	1.94035
2690_tnpA_Tn3_like_KR822247.1	transposase	tnpA	0.0365482	0.00196056	0.921792	0	1.93115
2258_tnpA_CAHO01000139.1	transposase	tnpA	0.0984772	0.0019486	0.178945	0	1.91937
474_IS91_AY545598.5	insertion_element_IS91	IS91	0.0121827	0.00194713	0.656287	0	1.91793
1731_IS91_CP003740.1	insertion_element_IS91	IS91	0.0852792	0.00194146	0.092885	0	1.91234
875_tnpA_AY305378.1	transposase	tnpA	0.0609137	0.00193224	0.194717	0	1.90326
2753_tnpA_KT282968.1	transposase	tnpA	0.0192893	0.00192404	0.339199	0	1.89518
1990_tnpA_LT608328.1	transposase	tnpA	0.0111675	0.00191953	1.1382	0	1.89073
690_tnpA_Y17752.1	transposase	tnpA	0.0263959	0.00191744	0.74125	0	1.88868
2558_IS91_MOIV01000035.1	insertion_element_IS91	IS91	0.00609137	0.00191541	0.585455	0	1.88668
2643_IS91_AJHK02000009.1	insertion_element_IS91	IS91	0.022335	0.00191228	0.30207	0	1.8836
622_tnpA_EU886978.1	transposase	tnpA	0.057868	0.00190805	0.223601	0	1.87943
1964_tnpA_EF408254.1	transposase	tnpA	0.048731	0.00190143	0.369954	0	1.87291
2193_tnpA_CXPB01000088.1	transposase	tnpA	0.0395939	0.00189671	0.646954	0	1.86826
857_IS91_CP007448.1	insertion_element_IS91	IS91	0.0314721	0.00188475	0.667242	0	1.85648
1840_tnpA_EU219534.1	transposase	tnpA	0.0253807	0.0018837	0.444849	0	1.85544
733_tnpA1_CBTR010000003.1	transposase	tnpA1	0.00812183	0.00188318	1.05498	0	1.85493
81_rep18_2_repA(pEF418)_AF408195	plasmid	rep18	0.00812183	0.00188254	0.560711	0	1.8543
178_IncFIA(HI1)_1_HI1_AF250878	plasmid	IncFIA(HI1)	0.0192893	0.00186871	0.325802	0	1.84068
1108_tnpA_JFEV01000096.1	transposase	tnpA	0.00913706	0.00186668	0.461262	0	1.83868
1030_tnpA_LK931667.1	transposase	tnpA	0.181726	0.00186206	0.0634315	0	1.83413
8_rep2_2_repR(pEF1)_DQ198088	plasmid	rep2	0.0142132	0.00184604	0.423149	0	1.81835
2614_tnpA_AJ251743.1	transposase	tnpA	0.191878	0.00184584	0.0719107	0	1.81815
2609_IS91_ABLD01000034.1	insertion_element_IS91	IS91	0.0182741	0.00184507	0.328754	0	1.81739
1316_tnpA_KF295828.1	transposase	tnpA	0.0121827	0.00183662	0.633065	0	1.80908
718_tnpA_KF680002.1	transposase	tnpA	0.0192893	0.00180074	0.250945	0	1.77373
298_tnpA_AE014299.2	transposase	tnpA	0.0111675	0.00179659	0.44877	0	1.76965
1530_tnpA_KU130294.1	transposase	tnpA	0.0395939	0.00179054	0.342913	0	1.76368
2702_tnpA_EF079106.1	transposase	tnpA	0.0964467	0.00178774	0.203813	0	1.76092
719_IS91_MIVX01000023.1	insertion_element_IS91	IS91	0.0416244	0.00176412	0.342896	0	1.73766
2254_tnpA_JNQU01000129.1	transposase	tnpA	0.00609137	0.00174966	0.709886	0	1.72342
2441_tnpA1_FR875157.1	transposase	tnpA1	0.080203	0.00174228	0.165439	0	1.71615
427_tnpA_JF785549.1	transposase	tnpA	0.0324873	0.00174016	0.207836	0	1.71406
530_tnpA_KT225462.1	transposase	tnpA	0.00913706	0.00173992	0.916611	0	1.71382
949_tnpA_CP000646.1	transposase	tnpA	0.0639594	0.00173044	0.130643	0	1.70449
1279_tnpAc_CCYE01000010.1	transposase	tnpAc	0.0395939	0.00172378	0.364136	0	1.69792
1621_tnpA_AY305378.1	transposase	tnpA	0.125888	0.00171702	0.0851142	0	1.69127
27_rep7_4_repD(pK214)_NC009751	plasmid	rep7	0.0162437	0.00171524	0.319274	0	1.68951
2617_IS91_APJK01000252.1	insertion_element_IS91	IS91	0.0111675	0.00171036	0.451914	0	1.68471
170_IncFIB(AP001918)_1__AP001918	plasmid	IncFIB(AP001918)	0.0101523	0.00170081	0.584596	0	1.6753
137_repUS15__ORF(E.faecium287)_NZAAAK010000287	plasmid	repUS15	0.013198	0.00169936	0.377886	0	1.67387
1404_IS91_CP003742.1	insertion_element_IS91	IS91	0.035533	0.00169767	0.550464	0	1.67221
258_Col(BS512)_1__NC_010656	plasmid	Col(BS512)	0.00913706	0.00169436	0.370444	0	1.66894
2071_IS91_FCOM02000090.1	insertion_element_IS91	IS91	0.022335	0.00168555	0.319273	0	1.66027
2743_tnpA_CT573071.1	transposase	tnpA	0.0192893	0.00168119	0.245882	0	1.65597
1494_tnpA_HF545434.1	transposase	tnpA	0.0243655	0.0016779	1.19904	0	1.65273
1795_tnpA_AM231748.2	transposase	tnpA	0.00609137	0.00167578	0.623761	0	1.65065
1884_IS91_CP000705.1	insertion_element_IS91	IS91	0.00609137	0.00167367	0.590228	0	1.64857
33_rep7_10_repC(pKH17)_NC_010284.1	plasmid	rep7	0.0101523	0.00164885	1.17194	0	1.62412
2075_tnpA_KJ746495.1	transposase	tnpA	0.0182741	0.00163862	0.188179	0	1.61404
1639_IS911	insertion_element_IS911	IS911	0.00913706	0.0016321	0.385212	0	1.60762
2227_tnpA_BAER01000036.1	transposase	tnpA	0.137056	0.0016196	0.102262	0	1.59531
2359_tnpA_FR854089.1	transposase	tnpA	0.0497462	0.00161257	0.645186	0	1.58839
2353_tnpA_6_CP014358.1	transposase	tnpA	0.00507614	0.00160766	0.667628	0	1.58354
1612_tnpA_DQ257628.1	transposase	tnpA	0.0893401	0.00158926	0.126001	0	1.56542
1778_tnpA_JX469829.1	transposase	tnpA	0.167513	0.00158485	0.0785194	0	1.56108
2544_tnpA_AFNV02000029.1	transposase	tnpA	0.00203046	0.00157883	0.824525	0	1.55514
1354_tniA_AEEU01000268.1	tniA	tniA	0.0406091	0.00157309	0.353652	0	1.5495
2240_tnpA_DQ167474.1	transposase	tnpA	0.0426396	0.0015713	0.209406	0	1.54773
115_rep21_13_rep(SAP101A)_GQ900495.1	plasmid	rep21	0.0152284	0.00157089	0.834089	0	1.54733
1200_IS91_CP000503.1	insertion_element_IS91	IS91	0.00203046	0.0015574	0.980508	0	1.53404
2542_tniB_FP103042.2	tniB	tniB	0.0771574	0.00154511	0.113468	0	1.52193
1509_tniB_AY305378.1	tniB	tniB	0.0619289	0.00153603	0.170801	0	1.51299
970_IS91_MOMM01000027.1	insertion_element_IS91	IS91	0.0111675	0.00153559	0.608079	0	1.51256
790_tnpA_GU371929.1	transposase	tnpA	0.0101523	0.00153361	0.512478	0	1.51061
1336_tnpA_CP001834.1	transposase	tnpA	0.0121827	0.00152945	0.267241	0	1.5065
1564_IS679_NC002142	IS679	IS679	0.0304569	0.0015264	0.424757	0	1.5035
2301_IS91_CYDC01000057.1	insertion_element_IS91	IS91	0.0071066	0.00152578	0.919827	0	1.50289
243_Col3M_1__JX514065	plasmid	Col3M	0.0071066	0.00152014	0.5554	0	1.49734
1668_tnpA_AE014299.2	transposase	tnpA	0.00609137	0.00151644	1.20787	0	1.4937
1652_tnpA_ANGG01000530.1	transposase	tnpA	0.0456853	0.00151437	0.899698	0	1.49165
1817_tnpA_AE014299.2	transposase	tnpA	0.0182741	0.00151031	0.394825	0	1.48765
858_IS91_CP003150.1	insertion_element_IS91	IS91	0.0152284	0.0015084	0.279961	0	1.48577
1901_tnpA_AM235768.1	transposase	tnpA	0.0162437	0.00150154	0.229767	0	1.47901
1636_tnpA_ISSod1_AE014300.1	transposase	tnpA	0.00609137	0.00149585	0.905904	0	1.47341
1929_tniA_AY305378.1	tniA	tniA	0.0781726	0.00149178	0.0946466	0	1.4694
1542_tnpA_AF492560.1	transposase	tnpA	0.0071066	0.00148436	0.541122	0	1.4621
163_IncR_1__DQ449578	plasmid	IncR	0.00913706	0.00148326	0.379791	0	1.46101
2239_tniB_AEEU01000268.1	tniB	tniB	0.0558376	0.00147992	0.131171	0	1.45772
1490_tnpA_AJ515144.2	transposase	tnpA	0.084264	0.00145874	0.222871	0	1.43686
1473_tnpA_AJ344068.1	transposase	tnpA	0.0619289	0.00145735	0.2107	0	1.43549
1663_IS91_FCOM02000090.1	insertion_element_IS91	IS91	0.022335	0.00145368	0.246611	0	1.43187
1017_tnpA_FKLR01000027.1	transposase	tnpA	0.035533	0.00144662	0.449171	0	1.42492
1749_IS91_CVRB01000001.1	insertion_element_IS91	IS91	0.035533	0.0014414	0.499295	0	1.41978
1629_tnpA_CDAH01000009.1	transposase	tnpA	0.0527919	0.0014363	0.108336	0	1.41475
514_IS91_MRWY01000004.1	insertion_element_IS91	IS91	0.0395939	0.00143112	0.0896592	0	1.40966
2050_tnpA_CP000353.2	transposase	tnpA	0.0314721	0.00142809	0.150876	0	1.40667
1558_tnpA_U13767.1	transposase	tnpA	0.057868	0.00141793	0.142672	0	1.39666
1378_tnpA_CCWG01000122.1	transposase	tnpA	0.0527919	0.00141788	0.197195	0	1.39661
2307_tnpA_AF333761.1	transposase	tnpA	0.121827	0.00141379	0.0767264	0	1.39258
2219_tnpA_KJ933392.1	transposase	tnpA	0.0172589	0.00140249	0.351503	0	1.38145
38_rep7_15_rep(pS0385-2)_AM990994.1	plasmid	rep7	0.00913706	0.00140196	0.820359	0	1.38093
818_tnpA_Y17749.1	transposase	tnpA	0.0213198	0.00140045	0.392968	0	1.37944
2200_tnpA_AY365053.1	transposase	tnpA	0.152284	0.00139988	0.124725	0	1.37888
157_IncN_1__AY046276	plasmid	IncN	0.0152284	0.00139977	0.41729	0	1.37878
1814_int3_HE617160.1	integrase	int3	0.0365482	0.00139872	0.193694	0	1.37774
557_tnpA_CP002367.1	transposase	tnpA	0.00609137	0.00139792	0.39274	0	1.37696
442_tnpA_AE014299.2	transposase	tnpA	0.00812183	0.00139625	0.349331	0	1.37531
2554_tnpA_CZDF01000174.1	transposase	tnpA	0.0771574	0.00139604	0.131013	0	1.3751
1770_tnpA_AM039951.1	transposase	tnpA	0.0852792	0.00138846	0.103378	0	1.36764
2802_tnpA2_HE578058.1	transposase	tnpA2	0.0172589	0.00135694	0.293115	0	1.33659
288_tnpA_HE577623.1	transposase	tnpA	0.0142132	0.00134261	0.657249	0	1.32247
577_tnpA_APZX01000083.1	transposase	tnpA	0.00913706	0.00133557	0.588441	0	1.31554
1579_tnpA_AIGD01000018.1	transposase	tnpA	0.00812183	0.00132753	0.355426	0	1.30762
981_IS91_CDSA010000003.1	insertion_element_IS91	IS91	0.0274112	0.00132613	0.172053	0	1.30624
1581_tnpA_CU459003.1	transposase	tnpA	0.0294416	0.00131497	0.115768	0	1.29524
679_tnpA1_AF550679.1	transposase	tnpA1	0.0203046	0.00130931	0.538981	0	1.28968
987_IS91_CP000514.1	insertion_element_IS91	IS91	0.00812183	0.00129487	0.545628	0	1.27544
696_IS91_AF074613.1	insertion_element_IS91	IS91	0.0182741	0.0012948	0.40615	0	1.27537
906_tnpA_FQ482074.1	transposase	tnpA	0.00812183	0.00129434	0.425036	0	1.27492
2084_tnpA_CP000354.2	transposase	tnpA	0.0233503	0.00128772	0.266302	0	1.2684
1185_tniB_CBTR010000030.1	tniB	tniB	0.0416244	0.00128676	0.148691	0	1.26746
897_IS91_ABLD01000034.1	insertion_element_IS91	IS91	0.0172589	0.00128298	0.289961	0	1.26373
1703_IS91_CP000681.1	insertion_element_IS91	IS91	0.00507614	0.0012786	0.972394	0	1.25942
809_tnpA2_JFHO01000231.1	transposase	tnpA2	0.143147	0.00127654	0.0958036	0	1.25739
1241_tnpA2B2-ISLL6_LT599053.1	transposase	tnpA2B2-ISLL6	0.0101523	0.00127353	0.388371	0	1.25443
1674_tnpA7_HE578057.1	transposase	tnpA7	0.0142132	0.00126969	0.334421	0	1.25064
757_tnpA_CDAN01000773.1	transposase	tnpA	0.0467005	0.0012616	0.23968	0	1.24268
329_tnpA_KC344543.1	transposase	tnpA	0.0741117	0.00126024	0.0724818	0	1.24133
2768_tnpA_CP010516.1	transposase	tnpA	0.100508	0.00125684	0.114775	0	1.23799
2150_IS91_CP000036.1	insertion_element_IS91	IS91	0.00507614	0.00124703	0.481567	0	1.22832
482_tnpA_FN649418.1	transposase	tnpA	0.0162437	0.00122971	0.313676	0	1.21127
500_tniB_GQ406245.5	tniB	tniB	0.0101523	0.00122349	0.634909	0	1.20514
1549_tnpA_CAGJ01000062.1	transposase	tnpA	0.057868	0.00121628	0.125462	0	1.19803
734_tnpA_KX646543.1	transposase	tnpA	0.0071066	0.00121425	0.441331	0	1.19603
171_IncFII_1__AY458016	plasmid	IncFII	0.00609137	0.00121015	0.547859	0	1.192
743_IS91_CP018817.1	insertion_element_IS91	IS91	0.013198	0.00120623	0.248595	0	1.18813
1306_tnpA_AM296017.1	transposase	tnpA	0.0456853	0.00119798	0.139079	0	1.18002
2250_tniB_AGFM01000122.1	tniB	tniB	0.0314721	0.00119232	0.333151	0	1.17444
763_tnpA_JX275775.1	transposase	tnpA	0.0253807	0.0011868	0.224042	0	1.169
1020_IS91_LFAQ01000019.1	insertion_element_IS91	IS91	0.0152284	0.00118667	0.231416	0	1.16887
995_IS91_CP001046.1	insertion_element_IS91	IS91	0.0142132	0.00117634	0.383771	0	1.1587
1307_IS91_AM902716.1	insertion_element_IS91	IS91	0.0182741	0.00117006	0.324432	0	1.15251
2454_tnpA_CYGY02000079.1	transposase	tnpA	0.109645	0.00116147	0.0423463	0	1.14405
899_tnpA_CP000857.1	transposase	tnpA	0.0111675	0.00115963	0.307873	0	1.14224
1084_tnpA_CP000352.1	transposase	tnpA	0.0233503	0.00115729	0.210076	0	1.13993
2394_IS91_CP001045.1	insertion_element_IS91	IS91	0.0152284	0.00115704	0.317687	0	1.13968
1576_tnpA_DQ914960.2	transposase	tnpA	0.0203046	0.0011503	0.225957	0	1.13305
1331_tnpAc_AB088420.3	transposase	tnpAc	0.0467005	0.00114747	0.238676	0	1.13026
1323_tnpA_GQ324957.1	transposase	tnpA	0.0385787	0.00114726	0.136417	0	1.13005
2259_tniA_JF262170.1	tniA	tniA	0.00913706	0.00114443	0.46125	0	1.12727
1292_tnpA_AB238971.1	transposase	tnpA	0.0294416	0.00114161	0.372711	0	1.12448
1418_IS91_FCOX02000103.1	insertion_element_IS91	IS91	0.022335	0.00113616	0.214934	0	1.11912
1021_tnpA_3_KU665642.1	transposase	tnpA	0.0121827	0.00113602	0.167688	0	1.11898
1140_tnpA_ACPY01000017.1	transposase	tnpA	0.022335	0.00113587	0.211346	0	1.11883
655_tnpA_DQ393661.1	transposase	tnpA	0.0111675	0.00113422	0.27258	0	1.1172
2625_tnpA_AY540995.2	transposase	tnpA	0.0274112	0.00113264	0.24738	0	1.11565
676_IS91_CP000749.1	insertion_element_IS91	IS91	0.00304569	0.0011313	0.76438	0	1.11433
1141_tnpA_KJ631729.1	transposase	tnpA	0.119797	0.0011266	0.0704015	0	1.1097
1360_tnpA_LXLL01000017.1	transposase	tnpA	0.0426396	0.00112279	0.203512	0	1.10595
2694_IS91_APXN01000134.1	insertion_element_IS91	IS91	0.00507614	0.00111613	0.311968	0	1.09939
2145_IS91_AKKD02000092.1	insertion_element_IS91	IS91	0.00406091	0.00111551	0.739985	0	1.09877
1931_IS91_AM746676.1	insertion_element_IS91	IS91	0.0284264	0.00111497	0.399731	0	1.09825
85_rep19_4_repA(pUB101)_NC005127	plasmid	rep19	0.00913706	0.00110851	0.560752	0	1.09188
999_tnpA_rve_CEGG01000033.1	transposase	tnpA	0.0304569	0.0011027	0.160967	0	1.08616
990_tnpA2_CP002879.1	transposase	tnpA2	0.022335	0.00110002	0.28649	0	1.08352
1326_tnpA_AF052055.1	transposase	tnpA	0.0335025	0.00109984	0.32101	0	1.08334
1754_IS91_CP000036.1	insertion_element_IS91	IS91	0.013198	0.00109301	0.242228	0	1.07662
2499_tnpA_13_CP014358.1	transposase	tnpA	0.0071066	0.00109046	0.580704	0	1.07411
380_tnpA_Y17750.1	transposase	tnpA	0.0192893	0.00108901	0.427995	0	1.07268
2568_tnpA_JN106175.1	transposase	tnpA	0.0497462	0.00108664	0.0946686	0	1.07034
1568_tnpA_FO704551.1	transposase	tnpA	0.0101523	0.00108315	0.764894	0	1.0669
1510_tnpA_KJ933392.1	transposase	tnpA	0.0111675	0.00107472	0.559005	0	1.0586
1982_tnpA_KP987218.1	transposase	tnpA	0.0111675	0.00107241	0.41327	0	1.05633
2703_tnpA_CCBE010000021.1	transposase	tnpA	0.0111675	0.0010703	0.167401	0	1.05425
2668_tnpA_KP893385.1	transposase	tnpA	0.00913706	0.00106212	0.299493	0	1.04619
169_IncY_1__K02380	plasmid	IncY	0.0071066	0.00105018	0.30553	0	1.03443
2085_tnpA_KR014106.1	transposase	tnpA	0.0152284	0.00104668	0.196015	0	1.03098
1041_IS91_AIGD01000018.1	insertion_element_IS91	IS91	0.00609137	0.00103856	0.271852	0	1.02298
13_rep4_1_CDS2(pCRL291.1)_NC002799	plasmid	rep4	0.0071066	0.00103186	0.36859	0	1.01638
2316_IS91_CP001715.1	insertion_element_IS91	IS91	0.0192893	0.00102743	0.170247	0	1.01202
1197_tnpA_AY365117.2	transposase	tnpA	0.0172589	0.00102735	0.242049	0	1.01194
1501_tnpA_LO018305.1	transposase	tnpA	0.0324873	0.0010266	0.528092	0	1.0112
2461_qacEdelta_HQ170510.1	qacEdelta	qacEdelta	0.00913706	0.00102261	0.237894	0	1.00727
2194_tnpA_LC015492.1	transposase	tnpA	0.0944162	0.00100802	0.0537707	0	0.9929
1943_IS91_CP001831.1	insertion_element_IS91	IS91	0.0182741	0.0010056	0.180952	0	0.990512
810_tnpA_KM390023.1	transposase	tnpA	0.00507614	0.00100118	0.723566	0	0.986164
2355_tnpA3_HG916853.1	transposase	tnpA3	0.0071066	0.00100113	0.398624	0	0.986113
457_tnpA_JGBS01000024.1	transposase	tnpA	0.00507614	0.000995118	0.539962	0	0.980191
2313_IS91_CP002447.1	insertion_element_IS91	IS91	0.0142132	0.000993902	0.230006	0	0.978993
2508_IS91_ASVO01000034.1	insertion_element_IS91	IS91	0.00812183	0.000992392	0.26896	0	0.977506
1756_IS91_CP000267.1	insertion_element_IS91	IS91	0.0071066	0.000984513	0.447253	0	0.969745
1027_tnpA_JN106169.1	transposase	tnpA	0.0192893	0.000971132	0.143716	0	0.956565
1806_int2_KP211414.1	integrase	int2	0.0182741	0.00096778	0.291698	0	0.953264
2573_tnpA_KU961660.2	transposase	tnpA	0.0324873	0.000966929	0.104846	0	0.952425
1132_tnpA_AY509004.1	transposase	tnpA	0.0121827	0.000964064	0.218894	0	0.949603
2531_tnpA1-ISLL6_LT599053.1	transposase	tnpA1-ISLL6	0.00609137	0.00095811	0.518084	0	0.943739
659_tnpA_AE014299.2	transposase	tnpA	0.0263959	0.000956517	0.280863	0	0.94217
250_Col(BS512)_1__NC_010656	plasmid	Col(BS512)	0.00812183	0.000953994	0.195775	0	0.939684
2311_IS91_CP002017.1	insertion_element_IS91	IS91	0.0385787	0.000952437	0.162628	0	0.938151
792_tnpA_CP003505.2	transposase	tnpA	0.0071066	0.000940629	0.473541	0	0.92652
520_tnpA_CP012903.1	transposase	tnpA	0.035533	0.000936425	0.344491	0	0.922379
789_tnpA_CP002474.1	transposase	tnpA	0.0101523	0.000935057	0.345617	0	0.921031
665_tnpA_AKND01000034.1	transposase	tnpA	0.00203046	0.000933759	0.780316	0	0.919752
2211_tnpA_CP001846.1	transposase	tnpA	0.022335	0.000932359	0.181645	0	0.918374
2496_tnpA_CP001846.1	transposase	tnpA	0.0071066	0.00093141	0.413086	0	0.917439
138_repUS16__repF(pE194)_M17811.1	plasmid	repUS16	0.00507614	0.000928253	0.824121	0	0.914329
1091_tnpA_AY327575.2	transposase	tnpA	0.0294416	0.000924023	0.117694	0	0.910163
2463_tnpA_EF439838.1	transposase	tnpA	0.0395939	0.000918709	0.0852797	0	0.904928
2627_tnpA_ISSod9_AE014300.1	transposase	tnpA	0.0345178	0.000917871	0.237946	0	0.904103
2483_tnpA_CP002196.1	transposase	tnpA	0.0142132	0.000916992	0.264986	0	0.903237
2019_tniB_AB270530.1	tniB	tniB	0.0142132	0.000910216	0.176271	0	0.896562
444_tnpA_AQAB01000114.1	transposase	tnpA	0.00406091	0.00090914	0.453941	0	0.895502
2675_IS91_CP001052.1	insertion_element_IS91	IS91	0.0192893	0.000907766	0.146497	0	0.894149
1937_IS91_ABHC01000011.1	insertion_element_IS91	IS91	0.0162437	0.000906198	0.148534	0	0.892605
244_Col156_1__NC_009781	plasmid	Col156	0.00507614	0.000900296	0.328341	0	0.886791
1853_IS91_CP003740.1	insertion_element_IS91	IS91	0.0406091	0.000900034	0.073501	0	0.886534
2035_tnpA_CBSZ010000094.1	transposase	tnpA	0.0111675	0.000899612	0.64326	0	0.886118
2624_IS91_CP002287.1	insertion_element_IS91	IS91	0.0111675	0.000898545	0.330908	0	0.885067
2635_tniA_JX194160.1	tniA	tniA	0.0406091	0.000896569	0.103209	0	0.88312
956_tnpA7_HG916853.1	transposase	tnpA7	0.0152284	0.000896354	0.242805	0	0.882909
1319_tnpA_AJ422230.1	transposase	tnpA	0.0172589	0.000895783	0.222651	0	0.882346
121_rep24_1_rep(pWBG745)_GQ900389.1	plasmid	rep24	0.00304569	0.000894062	0.814171	0	0.880651
611_tnpA_X98999.3	transposase	tnpA	0.0467005	0.000892813	0.119219	0	0.879421
2297_IS91_CP000616.1	insertion_element_IS91	IS91	0.0162437	0.00089066	0.19739	0	0.877301
2437_tnpA_KJ488943.1	transposase	tnpA	0.00304569	0.000883069	0.470976	0	0.869823
2384_IS91_MOJE01000055.1	insertion_element_IS91	IS91	0.00812183	0.000879603	0.301182	0	0.866409
2552_tnpA_CTEG01000053.1	transposase	tnpA	0.00203046	0.000873874	0.554808	0	0.860766
2125_IS91_CP005966.1	insertion_element_IS91	IS91	0.0111675	0.000869065	0.165243	0	0.856029
65_rep13_3_rep(pWBG1773)_EF537646	plasmid	rep13	0.0121827	0.000868329	0.455459	0	0.855304
2767_tnpA_KR780671.1	transposase	tnpA	0.00406091	0.000866927	0.766129	0	0.853923
975_tnpA_AB001611.1	transposase	tnpA	0.00507614	0.000866634	0.389551	0	0.853634
485_ISCR21_JN872329.1	ISCR	ISCR21	0.0345178	0.000866107	0.109035	0	0.853116
2408_int2_AE017042.1	integrase	int2	0.0162437	0.000857223	0.260229	0	0.844365
2270_tnpA_HG322949.1	transposase	tnpA	0.0121827	0.000850135	0.285311	0	0.837383
2444_tnpA_X87814.1	transposase	tnpA	0.0071066	0.00085006	0.495796	0	0.837309
1097_tnpA_CAGJ01000211.1	transposase	tnpA	0.0243655	0.000846993	0.325731	0	0.834288
2786_tnpA_CP000352.1	transposase	tnpA	0.0517766	0.000846229	0.0634828	0	0.833536
1145_tniB_CCRM01000039.1	tniB	tniB	0.0243655	0.000845713	0.402314	0	0.833027
726_tnpA_CTEV01000041.1	transposase	tnpA	0.00812183	0.000843564	0.351237	0	0.830911
909_IS91_CP000503.1	insertion_element_IS91	IS91	0.00406091	0.000841214	0.504636	0	0.828596
2195_tnpA_HM371194.1	transposase	tnpA	0.0071066	0.000839965	0.430598	0	0.827365
2757_tnpA_ISSod33_AE014300.1	transposase	tnpA	0.0172589	0.000839689	0.154926	0	0.827094
2578_tnpA_AY266269.1	transposase	tnpA	0.00609137	0.000839509	0.386515	0	0.826917
1916_tnpA_KC170280.1	transposase	tnpA	0.0152284	0.000831948	0.196225	0	0.819468
172_IncFIC(FII)_1__AP001918	plasmid	IncFIC(FII)	0.00913706	0.000830028	0.266329	0	0.817578
483_tnpA_HE577623.1	transposase	tnpA	0.0111675	0.00082969	0.251619	0	0.817244
2662_IS91_CP003740.1	insertion_element_IS91	IS91	0.0243655	0.000819455	0.265427	0	0.807163
147_IncHI1B(CIT)_1_pNDM-CIT_JX182975	plasmid	IncHI1B(CIT)	0.00812183	0.00081353	0.164682	0	0.801327
1597_IS91_CP005083.1	insertion_element_IS91	IS91	0.00913706	0.000812114	0.246872	0	0.799933
2158_IS91_CP000036.1	insertion_element_IS91	IS91	0.00507614	0.000807962	0.374068	0	0.795843
2639_qacEdelta_AF313472.2	qacEdelta	qacEdelta	0.00203046	0.000806002	0.774174	0	0.793912
2253_tnpA_AF439538.1	transposase	tnpA	0.00304569	0.000805608	0.458936	0	0.793524
596_tniAb_JN968483.3	tniAb	tniAb	0.0071066	0.000802295	0.608573	0	0.79026
164_IncFII(S)_1__CP000858	plasmid	IncFII(S)	0.0071066	0.000792596	0.350956	0	0.780707
114_rep21_12_rep(pKH3)_AF151117.1	plasmid	rep21	0.0101523	0.000789726	0.467012	0	0.77788
1026_tnpA_FN806773.1	transposase	tnpA	0.0142132	0.000783131	0.229538	0	0.771384
2515_IS91_CP003027.1	insertion_element_IS91	IS91	0.00812183	0.000777763	0.41259	0	0.766097
2387_tnpA_JN106170.1	transposase	tnpA	0.00406091	0.000771576	0.441977	0	0.760002
1942_IS91_MNRB01000036.1	insertion_element_IS91	IS91	0.0101523	0.000770809	0.16895	0	0.759247
54_rep10_5_repL(pWBG738)_DQ088624.1	plasmid	rep10	0.0071066	0.000767998	0.417919	0	0.756478
1635_tnpA_ISSod12_AE014300.1	transposase	tnpA	0.00507614	0.000756161	0.249171	0	0.744819
2468_IS91_JPGY02000001.1	insertion_element_IS91	IS91	0.0162437	0.000755654	0.180843	0	0.744319
553_tnpA_KP826703.1	transposase	tnpA	0.0314721	0.000753651	0.0996239	0	0.742346
1136_tnpA_JX570731.1	transposase	tnpA	0.0263959	0.000753302	0.180053	0	0.742002
913_tnpA_AY305378.1	transposase	tnpA	0.0446701	0.000752626	0.0789467	0	0.741337
1684_tnpA_LN794248.1	transposase	tnpA	0.00609137	0.000745393	0.305803	0	0.734212
2761_tnpA_FLLH01000004.1	transposase	tnpA	0.0253807	0.000740713	0.204751	0	0.729602
1167_tnpA_LROM01000066.1	transposase	tnpA	0.0243655	0.000739884	0.0939359	0	0.728786
487_IS91_CP001384.1	insertion_element_IS91	IS91	0.0152284	0.000737397	0.238169	0	0.726336
2393_tnpA_CP000354.2	transposase	tnpA	0.0172589	0.00073615	0.220605	0	0.725108
273_tnpA_KF826292.1	transposase	tnpA	0.022335	0.000734646	0.098975	0	0.723626
1238_tnpA_JX077110.1	transposase	tnpA	0.00609137	0.000734282	0.301892	0	0.723267
1970_tnpA_AM420293.1	transposase	tnpA	0.0192893	0.000733459	0.148378	0	0.722457
2497_tnpA_ISSod8_AE014300.1	transposase	tnpA	0.00406091	0.000730171	0.229172	0	0.719218
99_rep20_8_repA(SAP063A)_GQ900418.1	plasmid	rep20	0.00812183	0.000725066	0.351583	0	0.71419
1294_IS91_CU928162.2	insertion_element_IS91	IS91	0.0101523	0.00072483	0.237392	0	0.713958
187_IncFIB(pHCM2)_1_pHCM2_AL513384	plasmid	IncFIB(pHCM2)	0.0111675	0.000723155	0.227826	0	0.712307
57_rep10b_2_rep(pSK6)_SAU96610	plasmid	rep10b	0.00507614	0.000720048	0.523971	0	0.709248
817_tnpA_ISSod37_AE014300.1	transposase	tnpA	0.0071066	0.000713346	0.287298	0	0.702646
2395_IS91_FCOG02000101.1	insertion_element_IS91	IS91	0.00507614	0.000712988	0.384839	0	0.702294
1344_tnpA_AF060871.1	transposase	tnpA	0.013198	0.000708103	0.259759	0	0.697482
1856_IS91_CP011072.1	insertion_element_IS91	IS91	0.0101523	0.000707622	0.284359	0	0.697008
2173_tnpA_APYD01000144.1	transposase	tnpA	0.00609137	0.000706153	0.35372	0	0.69556
1318_tnpA1B1-ISLL6_LT599053.1	transposase	tnpA1B1-ISLL6	0.00609137	0.000702251	0.534947	0	0.691718
445_tnpA_AE008924.1	transposase	tnpA	0.0659898	0.000696298	0.0634697	0	0.685854
2354_tnpA_AFPR01000540.1	transposase	tnpA	0.022335	0.000694911	0.0982573	0	0.684487
1206_tnpA_CP002179.1	transposase	tnpA	0.0274112	0.000693879	0.104702	0	0.683471
1031_IS91_CP000490.1	insertion_element_IS91	IS91	0.00609137	0.000689385	0.316334	0	0.679044
946_tnpA_Y17741.1	transposase	tnpA	0.00913706	0.000683272	0.381199	0	0.673023
957_tnpA_KX029332.1	transposase	tnpA	0.00406091	0.000681385	0.331373	0	0.671164
127_repUS5__CDS20(pETB)_NC003265	plasmid	repUS5	0.0071066	0.000677494	0.283553	0	0.667332
52_rep10_3_ORF(pNE131)_NC001390	plasmid	rep10	0.00913706	0.000675491	0.22648	0	0.665359
1866_tnpA_KJ933392.1	transposase	tnpA	0.00406091	0.00067445	0.217154	0	0.664333
1352_tnpA_AE014299.2	transposase	tnpA	0.0101523	0.000673136	0.130106	0	0.663039
2676_IS91_CP002657.1	insertion_element_IS91	IS91	0.00406091	0.000672696	0.512212	0	0.662606
2283_tnpA_CU633751.1	transposase	tnpA	0.0751269	0.000670231	0.0598976	0	0.660178
1134_tnpA_CP003170.1	transposase	tnpA	0.00507614	0.00066898	0.292614	0	0.658945
1125_tnpA_CXPB01000073.1	transposase	tnpA	0.0253807	0.000664164	0.247562	0	0.654201
1009_tnpA_AY305378.1	transposase	tnpA	0.0182741	0.000662065	0.125565	0	0.652134
922_tnpA_KP987215.1	transposase	tnpA	0.0192893	0.000661369	0.17769	0	0.651449
846_tnpA_HF545435.1	transposase	tnpA	0.00304569	0.000661271	0.318841	0	0.651352
1310_tnpA_ISSod21_AE014300.1	transposase	tnpA	0.00406091	0.000658528	0.282233	0	0.64865
89_rep19_8_repA(pWBG759)_GQ900401.1	plasmid	rep19	0.0071066	0.00065546	0.284541	0	0.645628
404_tnpA_LT599583.1	transposase	tnpA	0.0467005	0.000653884	0.0399202	0	0.644076
43_rep7b_3_SAP089A_GQ900440.1	plasmid	rep7b	0.0071066	0.000650218	0.217897	0	0.640465
1458_IS91_CP000616.1	insertion_element_IS91	IS91	0.013198	0.00065021	0.163785	0	0.640457
31_rep7_8_CDS4(pS194)_NC005564	plasmid	rep7	0.0111675	0.000647978	0.164072	0	0.638258
1650_tnpA_CP000352.1	transposase	tnpA	0.0101523	0.000646413	0.29396	0	0.636717
55_rep10_6_rep(SAP093B)_GQ900442.1	plasmid	rep10	0.0071066	0.000644459	0.232177	0	0.634792
1987_tnpA_AE014299.2	transposase	tnpA	0.013198	0.000643819	0.157573	0	0.634161
2137_IS91_CU928162.2	insertion_element_IS91	IS91	0.0142132	0.000642864	0.219465	0	0.633221
1683_IS91_CP013141.1	insertion_element_IS91	IS91	0.00406091	0.000640942	0.365174	0	0.631328
2277_qacEdelta_CT025799.2	qacEdelta	qacEdelta	0.0142132	0.000637715	0.166958	0	0.62815
845_IS91_FM177140.1	insertion_element_IS91	IS91	0.00406091	0.000633033	0.334609	0	0.623538
309_tnpA_JQ690540.1	transposase	tnpA	0.00609137	0.000629566	0.363773	0	0.620122
1400_tnpA_AY148032.1	transposase	tnpA	0.022335	0.000623638	0.268693	0	0.614284
2070_IS26_LN794248.1	IS26	IS26	0.00609137	0.000622694	0.257017	0	0.613353
2420_IS91_CP002783.1	insertion_element_IS91	IS91	0.0152284	0.000621405	0.0980684	0	0.612084
1050_ISSfl3_AL391753	ISSfl3	ISSfl3	0.0111675	0.000620681	0.124904	0	0.611371
2492_tnpA_CAGJ01000127.1	transposase	tnpA	0.0416244	0.000620169	0.058285	0	0.610866
915_tnpA_AY607844.2	transposase	tnpA	0.0203046	0.000617078	0.294698	0	0.607822
1828_tnpA_AB434906.1	transposase	tnpA	0.0172589	0.000614964	0.196345	0	0.605739
1895_IS91_CXEP01000256.1	insertion_element_IS91	IS91	0.0071066	0.000614183	0.150858	0	0.604971
2488_IS91_CP019240.1	insertion_element_IS91	IS91	0.00406091	0.000609744	0.236024	0	0.600598
1290_tnpA_ISSod8_AE014300.1	transposase	tnpA	0.00507614	0.000609713	0.153857	0	0.600568
2414_tnpA_AE017355.1	transposase	tnpA	0.0213198	0.000606796	0.0783989	0	0.597694
1362_tnpA_KP893385.1	transposase	tnpA	0.00913706	0.000605321	0.157967	0	0.596241
1575_IS91_CP001053.1	insertion_element_IS91	IS91	0.00913706	0.000605045	0.193058	0	0.595969
2699_tnpA_JQ629929.1	transposase	tnpA	0.0172589	0.000602144	0.224042	0	0.593112
2074_tnpAa_AB088420.3	transposase	tnpAa	0.0284264	0.000601885	0.138173	0	0.592857
1869_tnpA_13_CP012683.1	transposase	tnpA	0.00812183	0.000598306	0.235732	0	0.589332
263_IncI2_1__KP347127	plasmid	IncI2	0.00304569	0.000590778	0.234095	0	0.581917
1083_int2_CP002967.1	integrase	int2	0.00609137	0.000590171	0.218641	0	0.581319
1918_tnpA_ISSod34_AE014300.1	transposase	tnpA	0.00406091	0.000589533	0.240426	0	0.58069
296_tnpA_KJ406378.1	transposase	tnpA	0.0142132	0.000589299	0.141151	0	0.580459
1616_tnpA_JN106171.1	transposase	tnpA	0.0121827	0.000588955	0.144309	0	0.580121
87_rep19_6_ORF34(EDINA)_AP003089.1	plasmid	rep19	0.0101523	0.000588453	0.21514	0	0.579626
1740_IS91_CP019240.1	insertion_element_IS91	IS91	0.035533	0.000584559	0.105469	0	0.57579
2351_tnpA_CBYB010000003.1	transposase	tnpA	0.0142132	0.000583839	0.13993	0	0.575081
1071_int3_HG916826.1	integrase	int3	0.0152284	0.000583294	0.221324	0	0.574545
1546_tnpA_AYLO01000004.1	transposase	tnpA	0.0071066	0.000580476	0.156471	0	0.571769
2559_tnpA_Y17830.1	transposase	tnpA	0.0182741	0.000580446	0.39509	0	0.571739
2229_tnpA_KR780671.1	transposase	tnpA	0.00203046	0.000579096	0.559633	0	0.570409
1857_IS91_CP003742.1	insertion_element_IS91	IS91	0.0192893	0.000577984	0.0986589	0	0.569315
2061_IS91_CP000514.1	insertion_element_IS91	IS91	0.00203046	0.000576556	0.38219	0	0.567908
1789_tniA_GQ406245.5	tniA	tniA	0.0121827	0.00057614	0.224908	0	0.567498
1293_tnpA_ISSod1_AE014300.1	transposase	tnpA	0.0101523	0.000575972	0.194058	0	0.567332
711_tniB_ANGG01000400.1	tniB	tniB	0.0101523	0.000575437	0.211624	0	0.566806
1543_tnpA_KU736877.1	transposase	tnpA	0.00507614	0.000575085	0.335669	0	0.566459
2218_["tnpA["]KR822246.1	transposase	tnpA	0.0203046	0.000573121	0.0863536	0	0.564525
760_tnpA_FBYD01000004.1	transposase	tnpA	0.00812183	0.00057124	0.155862	0	0.562671
1846_tnpA_AKNE01000024.1	transposase	tnpA	0.00507614	0.000571083	0.21095	0	0.562517
440_tniA_JX844629.1	tniA	tniA	0.013198	0.000566855	0.264597	0	0.558352
697_IS91_CP009632.1	insertion_element_IS91	IS91	0.0213198	0.000566078	0.116433	0	0.557587
1390_tnpA_BX936398.1	transposase	tnpA	0.00812183	0.000564617	0.284969	0	0.556148
2267_tnpA_KC354801.1	transposase	tnpA	0.0284264	0.000560867	0.100325	0	0.552454
113_rep21_11_rep(pSA1308)_AB254848.1	plasmid	rep21	0.0071066	0.000556711	0.355819	0	0.548361
2176_tnpA_FLQY01000007.1	transposase	tnpA	0.0162437	0.000554619	0.211896	0	0.5463
1768_tnpA_FQ482074.1	transposase	tnpA	0.00609137	0.00055446	0.159008	0	0.546143
1113_tnpA1_HE577054.1	transposase	tnpA1	0.0335025	0.000549924	0.0868973	0	0.541676
141_repUS19__rep(pDLK3)_GU562626.1	plasmid	repUS19	0.00203046	0.000547467	0.424743	0	0.539255
621_tnpA_3_AE017042.1	transposase	tnpA	0.022335	0.000547164	0.118956	0	0.538956
2481_IS91_AFHD01000025.1	insertion_element_IS91	IS91	0.00507614	0.000545163	0.207614	0	0.536986
1660_int3_CAPD01000005.1	integrase	int3	0.0172589	0.000544753	0.104232	0	0.536582
2727_IS91_CP000267.1	insertion_element_IS91	IS91	0.0142132	0.000542148	0.251596	0	0.534015
1493_tnpA_HG813238.1	transposase	tnpA	0.00913706	0.000542071	0.293253	0	0.53394
1465_tnpA_CP008804.1	transposase	tnpA	0.00203046	0.000541436	0.298264	0	0.533315
608_tnpA_AE014299.2	transposase	tnpA	0.00406091	0.000540692	0.241987	0	0.532582
2759_tnpA_ISSod4_AE014300.1	transposase	tnpA	0.00609137	0.000537146	0.103919	0	0.529089
1707_IS91_CP019240.1	insertion_element_IS91	IS91	0.00101523	0.000531053	0.523087	0	0.523087
2038_tnpA_CP005961.1	transposase	tnpA	0.0162437	0.000530504	0.231267	0	0.522546
2012_IS91_CU928162.2	insertion_element_IS91	IS91	0.00812183	0.000528758	0.170381	0	0.520827
1788_int2_X90708.2	integrase	int2	0.00507614	0.000526214	0.352213	0	0.51832
1349_tnpA_AE014299.2	transposase	tnpA	0.00609137	0.000521985	0.365968	0	0.514155
1711_IS91_LNYQ01000002.1	insertion_element_IS91	IS91	0.00812183	0.000519751	0.324417	0	0.511955
2133_IS91_CP003989.2	insertion_element_IS91	IS91	0.013198	0.000519746	0.174386	0	0.51195
1685_IS91_CP000034.1	insertion_element_IS91	IS91	0.00304569	0.000518022	0.20228	0	0.510252
606_IS91_AIEV01000007.1	insertion_element_IS91	IS91	0.00913706	0.000517973	0.0989284	0	0.510204
2777_tnpA_CP000354.2	transposase	tnpA	0.0304569	0.000516183	0.114963	0	0.50844
1045_IS91_CP000721.1	insertion_element_IS91	IS91	0.0213198	0.000515352	0.0661783	0	0.507621
2423_IS91_CP003740.1	insertion_element_IS91	IS91	0.0172589	0.000514496	0.100317	0	0.506779
1103_tniB_CP017646.1	tniB	tniB	0.00406091	0.000511926	0.32941	0	0.504247
2581_IS1166_U08850	IS1166	IS1166	0.0213198	0.000510917	0.102504	0	0.503254
2118_IS91_LNYY01000019.1	insertion_element_IS91	IS91	0.00812183	0.000506946	0.159503	0	0.499342
1765_tnpA_CP012901.1	transposase	tnpA	0.0203046	0.000506856	0.110343	0	0.499253
208_IncFII(pSE11)_1_pSE11_AP009242	plasmid	IncFII(pSE11)	0.00304569	0.000505263	0.23677	0	0.497684
2425_tnpA2_AB238971.1	transposase	tnpA2	0.00406091	0.000500989	0.155992	0	0.493474
131_repUS9__rep(pSK1)_AF203376	plasmid	repUS9	0.00812183	0.000500521	0.168347	0	0.493013
2368_IS91_MNRK01000081.1	insertion_element_IS91	IS91	0.00812183	0.000500109	0.134578	0	0.492607
1883_tnpA_JN127372.1	transposase	tnpA	0.0345178	0.000493481	0.168313	0	0.486079
1511_IS91_AQGG01000193.1	insertion_element_IS91	IS91	0.00101523	0.000491519	0.484147	0	0.484147
217_IncFII(pCoo)_1_pCoo_CR942285	plasmid	IncFII(pCoo)	0.00406091	0.000491333	0.253623	0	0.483963
2630_IS91_CP003742.1	insertion_element_IS91	IS91	0.0213198	0.000490566	0.0760549	0	0.483207
158_IncFIA_1__AP001918	plasmid	IncFIA	0.00406091	0.000487511	0.260642	0	0.480198
1872_tnpA_AE014299.2	transposase	tnpA	0.00304569	0.000486717	0.249784	0	0.479416
101_rep20_10_repA(SAP057A)_NC_013334.1	plasmid	rep20	0.00406091	0.000482716	0.254594	0	0.475475
816_tnpA3_HE577112.1	transposase	tnpA3	0.0071066	0.000482249	0.145761	0	0.475016
1056_IS91_CP019240.1	insertion_element_IS91	IS91	0.0253807	0.000480254	0.0626022	0	0.473051
1011_IS91_CP003740.1	insertion_element_IS91	IS91	0.0182741	0.000478929	0.178547	0	0.471745
795_tnpA_AE014299.2	transposase	tnpA	0.00507614	0.000473172	0.194996	0	0.466075
2799_tnpA_HE577055.1	transposase	tnpA	0.00203046	0.000472059	0.421243	0	0.464978
2495_tnpA_FMSH01000496.1	transposase	tnpA	0.0548223	0.000471465	0.0439699	0	0.464393
1391_IS91_CP002783.1	insertion_element_IS91	IS91	0.0152284	0.000471413	0.0960296	0	0.464342
126_repUS4__repA(pCI2000)_AF178424	plasmid	repUS4	0.0111675	0.000470076	0.0805231	0	0.463025
2532_tnpA_AF028594.1	transposase	tnpA	0.00406091	0.000466194	0.146141	0	0.459201
199_IncFIB(pLF82)_1_pLF82_CU638872	plasmid	IncFIB(pLF82)	0.00304569	0.000465758	0.298085	0	0.458772
1170_tnpA_ISSod8_AE014300.1	transposase	tnpA	0.00406091	0.000464922	0.183349	0	0.457948
2711_tnpA_AF121000.1	transposase	tnpA	0.0467005	0.000464014	0.0978385	0	0.457054
395_tnpA_JMNL01000234.1	transposase	tnpA	0.00203046	0.000463786	0.303075	0	0.456829
1446_tniA_CCES01000002.1	tniA	tniA	0.0111675	0.000463562	0.176317	0	0.456609
1463_tniA_AB270530.1	tniA	tniA	0.0203046	0.000462427	0.117532	0	0.45549
1891_IS91_CP003742.1	insertion_element_IS91	IS91	0.0304569	0.000460574	0.073736	0	0.453666
941_tnpA_FN649418.1	transposase	tnpA	0.00406091	0.000458639	0.40647	0	0.451759
1877_tnpA_CP000352.1	transposase	tnpA	0.00812183	0.000457262	0.235387	0	0.450403
166_IncU_1__DQ401103	plasmid	IncU	0.0121827	0.000455953	0.113706	0	0.449114
1951_tnpA_CP000042.1	transposase	tnpA	0.00507614	0.000453626	0.216082	0	0.446822
2065_IS91_CP000616.1	insertion_element_IS91	IS91	0.0121827	0.000453512	0.136468	0	0.44671
1584_int2_CP003858.1	integrase	int2	0.00913706	0.000452391	0.134328	0	0.445605
1691_tnpA_CR377166.1	transposase	tnpA	0.00507614	0.000451117	0.157581	0	0.44435
907_IS91_CP003235.1	insertion_element_IS91	IS91	0.0121827	0.00044932	0.122316	0	0.44258
92_rep20_1_ORF1(EDINA)_AP003089	plasmid	rep20	0.00507614	0.000448799	0.161575	0	0.442067
498_tnpA_CP003891.1	transposase	tnpA	0.0294416	0.000445749	0.195508	0	0.439063
1900_tnpA_AY148030.1	transposase	tnpA	0.0162437	0.000440742	0.134346	0	0.434131
1236_tnpA_KX029332.1	transposase	tnpA	0.013198	0.000440141	0.204565	0	0.433539
736_IS91_CP000891.1	insertion_element_IS91	IS91	0.00101523	0.000436146	0.429604	0	0.429604
1785_tnpA_AE014299.2	transposase	tnpA	0.00609137	0.000435584	0.119609	0	0.42905
1342_tnpA_CP001590.1	transposase	tnpA	0.0142132	0.000431997	0.208291	0	0.425517
1882_IS91_AJVX01000039.1	insertion_element_IS91	IS91	0.00507614	0.000429887	0.164072	0	0.423439
91_rep19_10_rep(pWBG746)_GQ900390.1	plasmid	rep19	0.00812183	0.000429009	0.17879	0	0.422574
326_IS91_CP000034.1	insertion_element_IS91	IS91	0.00609137	0.000428849	0.157306	0	0.422416
1470_tnpA_CAGQ01000006.1	transposase	tnpA	0.00507614	0.000428719	0.162122	0	0.422288
245_Col8282_1__DQ995353	plasmid	Col8282	0.00406091	0.000425888	0.227922	0	0.4195
2561_tnpA_KP987215.1	transposase	tnpA	0.0345178	0.000425335	0.0448416	0	0.418955
698_tnpA_AJ311891.3	transposase	tnpA	0.0121827	0.000423373	0.0795292	0	0.417023
2141_IS91_CP003879.1	insertion_element_IS91	IS91	0.00203046	0.000419616	0.212978	0	0.413322
1442_IS91_CP011072.1	insertion_element_IS91	IS91	0.0182741	0.000417109	0.0636257	0	0.410852
14_rep4_2_CDS3(pKC5b)_AF378372	plasmid	rep4	0.00203046	0.000416665	0.264799	0	0.410415
657_tnpA_ISSod8_AE014300.1	transposase	tnpA	0.00406091	0.000416516	0.148848	0	0.410269
334_IS91_MOIG01000044.1	insertion_element_IS91	IS91	0.00609137	0.000414807	0.156546	0	0.408585
2755_tnpA2-ISLL6_LT599053.1	transposase	tnpA2-ISLL6	0.00304569	0.000411595	0.259042	0	0.405422
1471_tnpA_CBZT010000006.1	transposase	tnpA	0.00507614	0.000410939	0.13504	0	0.404775
2607_tnpA_AF544991.1	transposase	tnpA	0.0659898	0.000408479	0.0281273	0	0.402352
2178_tnpA_CP003901.1	transposase	tnpA	0.00203046	0.000407007	0.205027	0	0.400902
1705_IS91_CP000302.1	insertion_element_IS91	IS91	0.00101523	0.00040679	0.400688	0	0.400688
1369_tnpA_BX908798.1	transposase	tnpA	0.0121827	0.000406265	0.101967	0	0.400171
1160_tnpA_ISSod36_AE014300.1	transposase	tnpA	0.00406091	0.000403933	0.258119	0	0.397874
2275_tnpA_AOCI01000012.1	transposase	tnpA	0.0172589	0.000403848	0.136816	0	0.39779
1164_tnpA_Z54268.1	transposase	tnpA	0.0203046	0.000402989	0.0838121	0	0.396944
2550_tnpA6_HE578057.1	transposase	tnpA6	0.0142132	0.000401872	0.175501	0	0.395844
2511_tnpA_BX908798.1	transposase	tnpA	0.00406091	0.000400912	0.186321	0	0.394898
1439_IS91_LGTC01000001.1	insertion_element_IS91	IS91	0.0071066	0.000399944	0.247318	0	0.393945
2036_tnpA_AY858559.1	transposase	tnpA	0.00406091	0.000399898	0.189355	0	0.393899
1068_IS91_CP005966.1	insertion_element_IS91	IS91	0.00609137	0.000399534	0.0934583	0	0.393541
496_tniB_CP017656.1	tniB	tniB	0.00203046	0.000398645	0.356088	0	0.392666
2138_IS91_MNRD01000143.1	insertion_element_IS91	IS91	0.0111675	0.000396312	0.090621	0	0.390367
1397_IS91_MNRX01000006.1	insertion_element_IS91	IS91	0.00507614	0.000395641	0.129133	0	0.389707
88_rep19_7_repA(SAP019A)_GQ900385.1	plasmid	rep19	0.0071066	0.000394302	0.204459	0	0.388388
1907_tnpA_AY232820.1	transposase	tnpA	0.0345178	0.000394199	0.0567503	0	0.388286
1980_tnpA_AE014299.2	transposase	tnpA	0.0111675	0.000393881	0.181707	0	0.387973
2264_tniB_CCES01000002.1	tniB	tniB	0.00304569	0.00039356	0.222296	0	0.387657
1524_tnpA_JN849689.1	transposase	tnpA	0.00812183	0.00039279	0.0867074	0	0.386898
1644_tnpA_KX029332.1	transposase	tnpA	0.013198	0.000391166	0.0723623	0	0.385299
708_IS91_MJHW01000008.1	insertion_element_IS91	IS91	0.0142132	0.000390718	0.0888616	0	0.384857
572_tnpA_CP004000.1	transposase	tnpA	0.0284264	0.000390248	0.0619035	0	0.384394
841_IS200_X56834	IS200	IS200	0.00507614	0.000388808	0.198639	0	0.382976
1975_tnpA_CP000352.1	transposase	tnpA	0.0152284	0.000387161	0.0807814	0	0.381353
2385_IS91_CP003740.1	insertion_element_IS91	IS91	0.0172589	0.000385271	0.0580477	0	0.379492
93_rep20_2_repA(pWBG753)_GQ900395.1	plasmid	rep20	0.00913706	0.000385196	0.0946569	0	0.379418
2005_tnpA_ISSod17_AE014300.1	transposase	tnpA	0.00406091	0.000384371	0.144699	0	0.378605
1333_tnpA_FJDF01000007.1	transposase	tnpA	0.0284264	0.000383613	0.138136	0	0.377859
1208_IS91_CP000721.1	insertion_element_IS91	IS91	0.0182741	0.000381843	0.0684497	0	0.376116
713_tnpA_JN887338.1	transposase	tnpA	0.0243655	0.000381647	0.0954024	0	0.375923
1088_tnpA_U33002.1	transposase	tnpA	0.0345178	0.000380854	0.0878399	0	0.375141
1229_tnpA_AY545598.5	transposase	tnpA	0.0101523	0.000377386	0.113485	0	0.371725
307_IS91_AGTD01000005.1	insertion_element_IS91	IS91	0.0071066	0.000375038	0.155619	0	0.369413
2021_tnpA_AF118548.1	transposase	tnpA	0.0111675	0.000374031	0.135261	0	0.36842
1497_tnpA_FJAO01000001.1	transposase	tnpA	0.0162437	0.000370494	0.132422	0	0.364937
277_tnpA_AF071413.3	transposase	tnpA	0.0284264	0.000369493	0.060661	0	0.363951
582_IS91_CP002186.1	insertion_element_IS91	IS91	0.00507614	0.000363833	0.261023	0	0.358376
1796_tnpA_CP007448.1	transposase	tnpA	0.00406091	0.000361184	0.230014	0	0.355766
930_tnpA_AAMK02000010.1	transposase	tnpA	0.00507614	0.00036039	0.127619	0	0.354985
1996_tnpA_3_FJNZ01000004.1	transposase	tnpA	0.00609137	0.000358236	0.196556	0	0.352863
626_int2_KF719972.1	integrase	int2	0.00812183	0.000358046	0.131166	0	0.352675
223_IncFII_1_pKP91_CP000966	plasmid	IncFII	0.00406091	0.000357783	0.184579	0	0.352417
7_rep2_1_ORF(E.faeciumContig1183)_JDOE	plasmid	rep2	0.0071066	0.000356832	0.102139	0	0.35148
2100_tnpA_CP000857.1	transposase	tnpA	0.00304569	0.000355763	0.190312	0	0.350427
2705_tnpA_KU254577.1	transposase	tnpA	0.00609137	0.000354934	0.255259	0	0.34961
2678_IS91_CP001672.1	insertion_element_IS91	IS91	0.00609137	0.00035376	0.166598	0	0.348454
1273_IS91_CP003742.1	insertion_element_IS91	IS91	0.013198	0.00035309	0.077567	0	0.347794
634_tnpA_AF148496.1	transposase	tnpA	0.00507614	0.000352983	0.162491	0	0.347688
1216_tnpA_CP002879.1	transposase	tnpA	0.0335025	0.000352211	0.0738225	0	0.346927
1225_tnpA_CALH01000114.1	transposase	tnpA	0.00812183	0.000345585	0.0631973	0	0.340401
614_tnpA_FP236842.1	transposase	tnpA	0.00913706	0.000344021	0.179856	0	0.33886
2310_tnpA_CCVZ01000009.1	transposase	tnpA	0.00609137	0.000343529	0.13812	0	0.338376
149_IncI1_1_Alpha_AP005147	plasmid	IncI1	0.00101523	0.000340986	0.335871	0	0.335871
79_rep17_1_CDS29(pRUM)_AF507977	plasmid	rep17	0.00203046	0.000340338	0.169908	0	0.335233
1619_int3_BA000030.4	integrase	int3	0.00507614	0.000339539	0.234881	0	0.334446
853_tnpA_JOQC01000036.1	transposase	tnpA	0.00101523	0.000338295	0.333221	0	0.333221
2435_tniA_AGFM01000122.1	tniA	tniA	0.0111675	0.000338114	0.0942035	0	0.333042
1123_tnpA_AMUK01000170.1	transposase	tnpA	0.00507614	0.000337729	0.0985663	0	0.332663
768_tnpA3_CP002879.1	transposase	tnpA3	0.0192893	0.000335008	0.0690049	0	0.329983
2415_tnpA_7_KU665642.1	transposase	tnpA	0.013198	0.000334497	0.0541758	0	0.32948
2770_tnpA_ISSod24_AE014300.1	transposase	tnpA	0.00609137	0.000333746	0.118073	0	0.32874
756_tnpA_AE014299.2	transposase	tnpA	0.00507614	0.000332033	0.144786	0	0.327052
165_IncFII(K)_1__CP000648	plasmid	IncFII(K)	0.00203046	0.000330782	0.230205	0	0.32582
2262_tniB_HG938355.1	tniB	tniB	0.00913706	0.00032937	0.169392	0	0.324429
2545_tnpA_CR555306.1	transposase	tnpA	0.00609137	0.000328608	0.148438	0	0.323679
109_rep21_7_rep(pWBG760)_GQ900473.1	plasmid	rep21	0.00913706	0.000328336	0.111193	0	0.323411
2565_tnpA_JOQO01000082.1	transposase	tnpA	0.00203046	0.000325995	0.165243	0	0.321105
2361_int2_CP010905.2	integrase	int2	0.00913706	0.000324796	0.0879834	0	0.319924
752_tnpA_GU371927.1	transposase	tnpA	0.00203046	0.000324042	0.260642	0	0.319182
2698_tnpA_CQDS01000010.1	transposase	tnpA	0.00406091	0.000322918	0.193038	0	0.318074
1175_tnpA_CCDT01000001.1	transposase	tnpA	0.00507614	0.00032278	0.111755	0	0.317939
2131_IS91_CP017007.1	insertion_element_IS91	IS91	0.00406091	0.000321962	0.112101	0	0.317132
1567_IS91_CP003740.1	insertion_element_IS91	IS91	0.0182741	0.000320704	0.043329	0	0.315894
2221_tnpA_AM286690.1	transposase	tnpA	0.00304569	0.000315408	0.200589	0	0.310677
801_tniA_KF040452.1	tniA	tniA	0.0142132	0.000314112	0.0943569	0	0.3094
236_pSM22_1__NC_015972	plasmid	pSM22	0.00406091	0.000313798	0.157857	0	0.309091
1922_qacEdelta_EF184217.1	qacEdelta	qacEdelta	0.00304569	0.000312805	0.179619	0	0.308113
890_IS91_CP004851.1	insertion_element_IS91	IS91	0.00609137	0.000310828	0.0793122	0	0.306165
923_tnpA_FMOA01000003.1	transposase	tnpA	0.0172589	0.000310414	0.110231	0	0.305758
1873_tnpA1_CP000831.1	transposase	tnpA1	0.0213198	0.000310273	0.0763155	0	0.305619
1234_IS91_CP000698.1	insertion_element_IS91	IS91	0.0142132	0.000308678	0.0830588	0	0.304048
71_rep15_1_repA(pLW043)_AE017171	plasmid	rep15	0.00406091	0.000307215	0.113539	0	0.302607
2140_IS91_CP001715.1	insertion_element_IS91	IS91	0.0071066	0.000306494	0.104484	0	0.301897
706_tnpA_AOEK01000039.1	transposase	tnpA	0.00406091	0.000305425	0.080774	0	0.300843
597_tnpA_AE014299.2	transposase	tnpA	0.00406091	0.000304658	0.111821	0	0.300088
1169_tnpA_EU780013.1	transposase	tnpA	0.0213198	0.000304656	0.0641625	0	0.300086
1139_tnpA_FJ796871.1	transposase	tnpA	0.00203046	0.000303504	0.154183	0	0.298952
2535_tnpA_LN831024.1	transposase	tnpA	0.00203046	0.000302858	0.281023	0	0.298315
2330_tnpA_AY780631.1	transposase	tnpA	0.00812183	0.000300305	0.0900441	0	0.295801
2189_tnpA_M90749.1	transposase	tnpA	0.0294416	0.000299291	0.0717405	0	0.294802
345_["tnpA[_Tn3_like"]KR822247.1	transposase	tnpA	0.0172589	0.000299037	0.0677002	0	0.294552
1492_tnpA7_HE577054.1	transposase	tnpA7	0.00812183	0.0002985	0.0671718	0	0.294023
2143_IS91_CP002738.1	insertion_element_IS91	IS91	0.0101523	0.000294894	0.0948242	0	0.290471
136_repUS14__repA(VRSAp)_AP003367	plasmid	repUS14	0.00609137	0.000293145	0.118321	0	0.288747
156_IncI2_1_Delta_AP002527	plasmid	IncI2	0.00304569	0.00029225	0.137195	0	0.287866
342_IS91_CP000034.1	insertion_element_IS91	IS91	0.00304569	0.000289631	0.189314	0	0.285287
35_rep7_12_rep(SAP060B)_GQ900417.1	plasmid	rep7	0.00304569	0.000288397	0.140633	0	0.284072
2597_IS91_MNXT01000023.1	insertion_element_IS91	IS91	0.0213198	0.000288086	0.0500052	0	0.283765
1801_tnpA_AJ422229.1	transposase	tnpA	0.00406091	0.000287219	0.184887	0	0.282911
1189_IS91_LGMC01000237.1	insertion_element_IS91	IS91	0.00406091	0.000286386	0.142201	0	0.28209
10_rep3_2_rep165(pBMB165)_DQ242517	plasmid	rep3	0.0172589	0.000286023	0.156757	0	0.281733
947_tnpA_JX077110.1	transposase	tnpA	0.00406091	0.00028504	0.182074	0	0.280765
2001_tnpA_KU666837.1	transposase	tnpA	0.0101523	0.000284813	0.103251	0	0.280541
2619_IS91_CP003740.1	insertion_element_IS91	IS91	0.00812183	0.000284763	0.0823979	0	0.280491
1264_tnpA_AE014299.2	transposase	tnpA	0.00406091	0.000283536	0.142224	0	0.279283
2198_tnpA_KX710093.1	transposase	tnpA	0.0172589	0.000282162	0.059739	0	0.277929
658_IS91_CP002738.1	insertion_element_IS91	IS91	0.0213198	0.000281174	0.0714944	0	0.276956
764_int2_LN614756.1	integrase	int2	0.00507614	0.000280672	0.163773	0	0.276462
1894_IS91_LM651928.1	insertion_element_IS91	IS91	0.0071066	0.000279946	0.0660692	0	0.275746
924_tnpA_FR877557.1	transposase	tnpA	0.00609137	0.000278776	0.102354	0	0.274595
2216_tnpA_KP893385.1	transposase	tnpA	0.0071066	0.000278354	0.144931	0	0.274179
2177_tnpA_AE014299.2	transposase	tnpA	0.00406091	0.000277156	0.121957	0	0.272999
2087_tnpA_CP002124.1	transposase	tnpA	0.00812183	0.000276172	0.116454	0	0.27203
1374_tnpA_JEMZ01000267.1	transposase	tnpA	0.00812183	0.000275921	0.22244	0	0.271782
2345_tnpA1_AKND01000034.1	transposase	tnpA1	0.00203046	0.000275423	0.136727	0	0.271291
1928_tniA_CP000644.1	tniA	tniA	0.00203046	0.000274894	0.245431	0	0.27077
1664_tnpA_1_AE017042.1	transposase	tnpA	0.0121827	0.000271284	0.0856648	0	0.267215
594_tnpA_DQ875599.1	transposase	tnpA	0.00913706	0.000271124	0.0684	0	0.267057
1087_tnpA_ISSod1_AE014300.1	transposase	tnpA	0.00406091	0.000270063	0.126969	0	0.266012
2236_tnpA_CAGD01000034.1	transposase	tnpA	0.0111675	0.00026987	0.12111	0	0.265822
1879_IS91_CP001053.1	insertion_element_IS91	IS91	0.00406091	0.00026905	0.124765	0	0.265014
11_rep3_3_rep(pBT9727)_CP000047	plasmid	rep3	0.0121827	0.000268682	0.184127	0	0.264652
2015_IS91_CP002783.1	insertion_element_IS91	IS91	0.00609137	0.00026853	0.0847195	0	0.264502
693_tnpA_X90708.2	transposase	tnpA	0.0172589	0.000266625	0.0900603	0	0.262625
720_IS91_MOHK01000618.1	insertion_element_IS91	IS91	0.00304569	0.000265632	0.114659	0	0.261648
1081_int3_CALN01000327.1	integrase	int3	0.00609137	0.000265576	0.121658	0	0.261592
1089_tnpA_KF295829.1	transposase	tnpA	0.0071066	0.000264786	0.166371	0	0.260814
1994_tnpA_AE014299.2	transposase	tnpA	0.00406091	0.000263858	0.117147	0	0.2599
46_rep9_1_repA(pAD1)_L01794	plasmid	rep9	0.00304569	0.000263832	0.215623	0	0.259874
1580_tniA_FMJB01000001.1	tniA	tniA	0.022335	0.00026106	0.076327	0	0.257144
2579_tnpA_KM877517.1	transposase	tnpA	0.00406091	0.000260897	0.0988043	0	0.256984
1268_tnpA_KJ488943.1	transposase	tnpA	0.00406091	0.000259394	0.118095	0	0.255504
74_rep16_3_rep(Saa6159)_CP002115.1	plasmid	rep16	0.00406091	0.000259227	0.178627	0	0.255339
1986_tnpA_AE014299.2	transposase	tnpA	0.00507614	0.000258281	0.0967947	0	0.254407
2503_tnpA1_FMJB01000022.1	transposase	tnpA1	0.0253807	0.000257922	0.0307558	0	0.254053
2000_tnpA_AB052615.1	transposase	tnpA	0.00507614	0.0002553	0.0811794	0	0.25147
821_tnpA_CP002125.1	transposase	tnpA	0.0111675	0.000255022	0.096733	0	0.251196
1572_qacEdelta_AB759690.1	qacEdelta	qacEdelta	0.00101523	0.000252546	0.248758	0	0.248758
927_tnpA_CP009435.1	transposase	tnpA	0.0152284	0.000250344	0.0379823	0	0.246589
1227_tnpA_AY780525.1	transposase	tnpA	0.0182741	0.000248839	0.0808587	0	0.245107
1215_IS91_MOCQ01000095.1	insertion_element_IS91	IS91	0.00507614	0.000247052	0.086682	0	0.243346
2476_IS91_MNRD01000033.1	insertion_element_IS91	IS91	0.00913706	0.000244828	0.0640265	0	0.241156
19_rep5_4_rep(SAP047A)_GQ900405.1	plasmid	rep5	0.0071066	0.000243654	0.0725986	0	0.239999
716_tnpA_KT988018.1	transposase	tnpA	0.00203046	0.000243515	0.170785	0	0.239862
2404_int2_CP001830.1	integrase	int2	0.00913706	0.000242553	0.0590244	0	0.238914
253_Col(SD853)_1__NC_015392	plasmid	Col(SD853)	0.00609137	0.000242423	0.0683514	0	0.238786
2174_tnpA_AE014299.2	transposase	tnpA	0.00406091	0.000241398	0.111242	0	0.237777
338_IS91_CP000034.1	insertion_element_IS91	IS91	0.00609137	0.000240949	0.0848648	0	0.237335
1981_tnpA_AOCI01000135.1	transposase	tnpA	0.0101523	0.000240646	0.0846269	0	0.237036
1904_tniA_KF439868.1	tniA	tniA	0.0162437	0.00024028	0.0404019	0	0.236676
94_rep20_3_rep(pTW20)_FN433597.1	plasmid	rep20	0.00406091	0.000239074	0.177071	0	0.235488
2798_tnpA_CP000042.1	transposase	tnpA	0.00203046	0.000238637	0.217364	0	0.235057
2324_IS91_MNYJ01000177.1	insertion_element_IS91	IS91	0.00609137	0.000238234	0.0857075	0	0.234661
1803_int3_FR775240.1	integrase	int3	0.00609137	0.000237362	0.0762884	0	0.233802
1436_tnpA_CP000353.2	transposase	tnpA	0.00609137	0.000237126	0.0959209	0	0.233569
1747_IS91_MJVB01000022.1	insertion_element_IS91	IS91	0.00812183	0.000235782	0.0562036	0	0.232246
744_tnpA_AF110140.1	transposase	tnpA	0.0294416	0.000234692	0.0781184	0	0.231172
1696_IS91_CP000514.1	insertion_element_IS91	IS91	0.0071066	0.000234126	0.0836321	0	0.230614
808_IS91_APYR01000089.1	insertion_element_IS91	IS91	0.00203046	0.000232943	0.149156	0	0.229449
2502_IS91_HG916855.1	insertion_element_IS91	IS91	0.00507614	0.000232894	0.113571	0	0.229401
12_rep3_4_CDS38(pOX2)_NC002146	plasmid	rep3	0.00812183	0.000231907	0.122154	0	0.228428
510_IS91_AQAW01000076.1	insertion_element_IS91	IS91	0.00101523	0.000230242	0.226789	0	0.226789
1162_tnpA_ISSod4_AE014300.1	transposase	tnpA	0.00406091	0.000229419	0.0654264	0	0.225978
1001_tnpA_FP236842.1	transposase	tnpA	0.0071066	0.00022824	0.0804334	0	0.224817
1569_tnpA_AEED01000028.1	transposase	tnpA	0.00203046	0.000227574	0.148865	0	0.224161
954_tnpA_KP987218.1	transposase	tnpA	0.00304569	0.000223531	0.141856	0	0.220178
2533_tnpA_AOCI01000205.1	transposase	tnpA	0.013198	0.000223039	0.0677015	0	0.219694
1859_IS91_CP003740.1	insertion_element_IS91	IS91	0.013198	0.000222784	0.0347262	0	0.219443
2123_IS91_MQUF01000021.1	insertion_element_IS91	IS91	0.00913706	0.000221157	0.0867529	0	0.21784
1666_IS91_FCOK02000015.1	insertion_element_IS91	IS91	0.00406091	0.000219306	0.059127	0	0.216016
2017_IS91_CP019242.1	insertion_element_IS91	IS91	0.00507614	0.00021727	0.179092	0	0.214011
1956_tnpA_AJ582645.1	transposase	tnpA	0.00101523	0.000217151	0.213894	0	0.213894
2595_IS91_APLF01000001.1	insertion_element_IS91	IS91	0.00304569	0.000216566	0.106822	0	0.213317
2096_tnpA_AB375440.1	transposase	tnpA	0.0253807	0.000215652	0.0492588	0	0.212417
2604_tnpA_CAVM010000213.1	transposase	tnpA	0.00507614	0.000214618	0.149652	0	0.211398
2162_tnpA_U73041.1	transposase	tnpA	0.00812183	0.000213371	0.0470346	0	0.21017
2685_IS91_CP000272.1	insertion_element_IS91	IS91	0.0071066	0.000210098	0.0522091	0	0.206947
589_int3_LN890524.1	integrase	int3	0.00507614	0.000208826	0.132085	0	0.205694
1286_tnpA1_AIHH01000057.1	transposase	tnpA1	0.00101523	0.000208677	0.205547	0	0.205547
2110_IS91_CP002160.1	insertion_element_IS91	IS91	0.00304569	0.00020819	0.0887097	0	0.205067
547_tnpA_FIID01000012.1	transposase	tnpA	0.00304569	0.000207872	0.0955981	0	0.204753
2655_IS91_CP019240.1	insertion_element_IS91	IS91	0.013198	0.000204238	0.0666764	0	0.201175
521_tnpA_AJ318089.1	transposase	tnpA	0.00812183	0.000203712	0.0878064	0	0.200656
617_IS91_MJVB01000036.1	insertion_element_IS91	IS91	0.00304569	0.000198254	0.165463	0	0.19528
2805_tniA_KU549175.1	tniA	tniA	0.0101523	0.000195795	0.0699254	0	0.192858
1464_tnpA_ANKQ01000003.1	transposase	tnpA	0.0111675	0.000195581	0.0552482	0	0.192647
2009_tnpA_KP125893.1	transposase	tnpA	0.00913706	0.000194189	0.0563401	0	0.191277
1171_IS91_MSJY01000168.1	insertion_element_IS91	IS91	0.00101523	0.000193349	0.190448	0	0.190448
1491_tniA_AM993098.1	tniA	tniA	0.00913706	0.000190525	0.0887675	0	0.187667
1838_IS91_AMXC01000007.1	insertion_element_IS91	IS91	0.00304569	0.000190152	0.113729	0	0.1873
884_tnpA_CP002124.1	transposase	tnpA	0.00913706	0.000190149	0.0936459	0	0.187297
266_Rep_1_pKPC-2_CP011573	plasmid	Rep	0.00609137	0.000189693	0.0504668	0	0.186848
2252_tnpA_LK021128.1	transposase	tnpA	0.0263959	0.000186332	0.042183	0	0.183537
1889_IS91_ASXP01000006.1	insertion_element_IS91	IS91	0.00609137	0.000185945	0.0879319	0	0.183156
2571_tnpA_AIGK01000078.1	transposase	tnpA	0.00203046	0.00018591	0.0922904	0	0.183122
1804_int2_AF135182.4	integrase	int2	0.00203046	0.000184782	0.153301	0	0.182011
177_IncHI1B_1_pNDM-MAR_JN420336	plasmid	IncHI1B	0.00406091	0.000184367	0.082422	0	0.181601
23_rep6_1_repA(p703/5)_AF109375	plasmid	rep6	0.00203046	0.000183225	0.149841	0	0.180477
1257_tnpA_CP002039.1	transposase	tnpA	0.013198	0.000181097	0.0325057	0	0.178381
1984_tnpA1_FR775255.1	transposase	tnpA1	0.00101523	0.000180877	0.178164	0	0.178164
1337_tnpA_AP001918.1	transposase	tnpA	0.0121827	0.000180816	0.0352158	0	0.178104
2754_tnpA_CYGH01000010.1	transposase	tnpA	0.00203046	0.000180715	0.164674	0	0.178004
2272_tnpA_ANKQ01000002.1	transposase	tnpA	0.0111675	0.000180616	0.0539182	0	0.177907
1936_IS91_AKKM01000045.1	insertion_element_IS911	IS91	0.00101523	0.000179881	0.177183	0	0.177183
1672_tnpA_AE014299.2	transposase	tnpA	0.00304569	0.000179496	0.113466	0	0.176804
1166_tniA_CP002879.1	tniA	tniA	0.00913706	0.000179492	0.0573822	0	0.176799
1148_tniA_JFYY01000019.1	tniA	tniA	0.00507614	0.00017871	0.0807459	0	0.17603
1677_IS91_CP000681.1	insertion_element_IS91	IS91	0.00203046	0.000178555	0.154349	0	0.175877
2230_tnpA_AF548142.1	transposase	tnpA	0.00812183	0.000177285	0.0481222	0	0.174626
2337_tnpA_AE014299.2	transposase	tnpA	0.00203046	0.000175272	0.0943442	0	0.172643
2203_tnpA_CCET01000003.1	transposase	tnpA	0.00101523	0.000173732	0.171126	0	0.171126
1155_tnpA_FP236830.1	transposase	tnpA	0.0172589	0.000172384	0.041881	0	0.169798
1775_tnpA_CP000040.1	transposase	tnpA	0.0284264	0.000170635	0.0208516	0	0.168075
2657_IS91_CP000503.1	insertion_element_IS91	IS91	0.00101523	0.000169788	0.167241	0	0.167241
1725_IS91_AAXY01000043.1	insertion_element_IS91	IS91	0.00406091	0.000169603	0.0574524	0	0.167059
2410_qacEdelta_DQ401103.1	qacEdelta	qacEdelta	0.00203046	0.000167814	0.102663	0	0.165297
1759_tnpA_CP007448.1	transposase	tnpA	0.00203046	0.000167469	0.150178	0	0.164957
2222_tnpA_CDAD01000043.1	transposase	tnpA	0.00101523	0.000167376	0.164865	0	0.164865
1370_tnpA_AE014299.2	transposase	tnpA	0.00507614	0.000166781	0.0512146	0	0.16428
2093_IS91_MQRH01000048.1	insertion_element_IS91	IS91	0.00609137	0.000165732	0.0627348	0	0.163246
912_IS91_CU928162.2	insertion_element_IS91	IS91	0.00507614	0.000165024	0.0606289	0	0.162548
590_tnpA_AY123045.1	transposase	tnpA	0.00507614	0.000165008	0.108832	0	0.162533
2097_tnpA_ISSod1__AAYX01000002.1	transposase	tnpA	0.00507614	0.000164663	0.117457	0	0.162193
849_IS91_CP001013.1	insertion_element_IS91	IS91	0.00812183	0.000164176	0.0318996	0	0.161713
723_tnpA_AF102990.1	transposase	tnpA	0.00609137	0.000162724	0.0733655	0	0.160283
2108_IS91_CP002017.1	insertion_element_IS91	IS91	0.00609137	0.00016045	0.0855798	0	0.158044
2304_tnpA_AB066362.1	transposase	tnpA	0.00406091	0.00016002	0.0585268	0	0.157619
579_tnpA_2_FJNY01000001.1	transposase	tnpA	0.0121827	0.000159906	0.0495457	0	0.157508
1477_tnpA_JGVR01000088.1	transposase	tnpA	0.00203046	0.000158997	0.102873	0	0.156612
2664_IS91_CP001046.1	insertion_element_IS91	IS91	0.00203046	0.000158088	0.102804	0	0.155717
233_pENTAS02_1__CP003028	plasmid	pENTAS02	0.00406091	0.000157507	0.0516491	0	0.155144
1892_IS91_CP004387.1	insertion_element_IS91	IS91	0.00101523	0.000157231	0.154872	0	0.154872
984_IS91_MQRH01000041.1	insertion_element_IS91	IS91	0.0071066	0.00015679	0.0912187	0	0.154438
289_tnpA_KX029332.1	transposase	tnpA	0.00304569	0.000156509	0.0690534	0	0.154161
2164_IS91_ABKX01000001.1	insertion_element_IS91	IS91	0.00101523	0.000152973	0.150678	0	0.150678
1718_tnpA_CP011271.1	transposase	tnpA	0.0071066	0.000152777	0.0914109	0	0.150486
2506_IS91_CP003235.1	insertion_element_IS91	IS91	0.00507614	0.000152636	0.0455956	0	0.150346
1881_IS91_MNQS01000105.1	insertion_element_IS91	IS91	0.00406091	0.00015003	0.073613	0	0.147779
205_IncFIB(pENTAS01)_1_pENTAS01_CP003027	plasmid	IncFIB(pENTAS01)	0.00507614	0.000149712	0.0967278	0	0.147467
18_rep5_3_rep(pWBG752)_GQ900394.1	plasmid	rep5	0.00304569	0.000148737	0.0958138	0	0.146506
2541_tniB_CP002879.1	tniB	tniB	0.0071066	0.000148151	0.0538205	0	0.145928
2762_tnpA_CP009555.1	transposase	tnpA	0.00304569	0.000147826	0.0683171	0	0.145609
1254_IS91_CP003989.2	insertion_element_IS91	IS91	0.00406091	0.000146453	0.109199	0	0.144256
1626_tnpA_CP000633.1	transposase	tnpA	0.00304569	0.000146023	0.0550745	0	0.143833
1609_int2_KT389472.1	integrase	int2	0.00101523	0.000145883	0.143695	0	0.143695
2066_IS91_LRLC01000006.1	insertion_element_IS91	IS91	0.00304569	0.00014412	0.064202	0	0.141958
42_rep7b_2_pVGA_NC_011605.1	plasmid	rep7b	0.00304569	0.0001435	0.0696469	0	0.141348
1737_IS91_MKFJ01000016.1	insertion_element_IS91	IS91	0.00406091	0.000142635	0.0740334	0	0.140495
285_tniA_HQ662557.1	tniA	tniA	0.00304569	0.000142551	0.0513894	0	0.140413
2184_tnpA_CP007448.1	transposase	tnpA	0.00101523	0.000142111	0.13998	0	0.13998
2306_tnpA_AE014299.2	transposase	tnpA	0.00304569	0.000142034	0.0702285	0	0.139903
222_IncFII_1_pSFO_AF401292	plasmid	IncFII	0.00203046	0.000140391	0.0858516	0	0.138285
1721_tnpA_AE014299.2	transposase	tnpA	0.00101523	0.000140124	0.138022	0	0.138022
886_tnpA_3_CP014358.1	transposase	tnpA	0.00203046	0.000139508	0.0853467	0	0.137416
1863_tnpA_CP009794.1	transposase	tnpA	0.00304569	0.000139344	0.0536754	0	0.137254
240_IncX1_2__CP003417	plasmid	IncX1	0.00203046	0.000137712	0.0684824	0	0.135646
1450_tnpA_CP002290.1	transposase	tnpA	0.00203046	0.000136277	0.0855439	0	0.134233
118_rep22_2_repU(pKKS825)_FN377602.2	plasmid	rep22	0.00203046	0.000135133	0.114663	0	0.133106
1462_IS91_LGTC01000001.1	insertion_element_IS91	IS91	0.00507614	0.000134801	0.0573286	0	0.132779
2498_tnpA_AE014299.2	transposase	tnpA	0.00406091	0.000134676	0.0706208	0	0.132656
1202_IS91_AQDB01000097.1	insertion_element_IS91	IS91	0.00101523	0.000131503	0.12953	0	0.12953
2317_IS91_CP000039.1	insertion_element_IS91	IS91	0.00203046	0.000131496	0.108044	0	0.129524
2064_IS91_CP019240.1	insertion_element_IS91	IS91	0.0152284	0.000130615	0.0373253	0	0.128656
1424_tnpA_CXZU01000085.1	transposase	tnpA	0.0111675	0.000129641	0.03505	0	0.127696
828_tniB_KT779035.1	tniB	tniB	0.00101523	0.000129424	0.127482	0	0.127482
2606_tnpA1_AB238971.1	transposase	tnpA1	0.00609137	0.000128431	0.045944	0	0.126504
722_tnpA_Y18009.2	transposase	tnpA	0.00406091	0.000127488	0.0657309	0	0.125575
1594_int2_CP006632.1	integrase	int2	0.00406091	0.000127298	0.0476514	0	0.125388
2168_IS91_CU928162.2	insertion_element_IS91	IS91	0.00101523	0.000126998	0.125093	0	0.125093
740_IS91_CP017770.1	insertion_element_IS91	IS91	0.00406091	0.000126654	0.109374	0	0.124754
2729_tnpA_KU736870.1	transposase	tnpA	0.00406091	0.000126432	0.069185	0	0.124536
305_IS91_CP001063.1	insertion_element_IS91	IS91	0.00304569	0.000125609	0.0441088	0	0.123724
1611_IS91_MIXE01000079.1	insertion_element_IS91	IS91	0.00304569	0.000125422	0.0559336	0	0.123541
1670_IS91_CP000034.1	insertion_element_IS911	IS91	0.00101523	0.000123789	0.121933	0	0.121933
2587_IS91_HF680312.1	insertion_element_IS91	IS91	0.00101523	0.000123097	0.121251	0	0.121251
1719_IS91_APYS01000005.1	insertion_element_IS91	IS91	0.00101523	0.00012288	0.121037	0	0.121037
1733_IS91_CP002959.1	insertion_element_IS91	IS91	0.00812183	0.000122524	0.022801	0	0.120687
1_rep1_1_repE(pAMbeta1)_AF007787	plasmid	rep1	0.00304569	0.000121612	0.0605999	0	0.119787
2792_tniB_AMFJ01009282.1	tniB	tniB	0.00609137	0.000119967	0.0531368	0	0.118168
1973_tnpA_KX029332.1	transposase	tnpA	0.00101523	0.000119944	0.118145	0	0.118145
486_IS91_CP001252.1	insertion_element_IS91	IS91	0.00203046	0.000119602	0.108241	0	0.117808
256_Col(Ye4449)_1__FJ696405	plasmid	Col(Ye4449)	0.00101523	0.000119357	0.117566	0	0.117566
1408_tnpA3_CP001894.1	transposase	tnpA3	0.00609137	0.000117322	0.0583591	0	0.115562
47_rep9_2_prgW(pCF10)_AY855841	plasmid	rep9	0.00304569	0.00011707	0.0870238	0	0.115314
607_tnpA_KM107842.1	transposase	tnpA	0.00812183	0.000115577	0.0316808	0	0.113843
2493_tnpA_U03554.1	transposase	tnpA	0.0162437	0.000115217	0.0339456	0	0.113488
543_tnpA_APXN01000234.1	transposase	tnpA	0.00101523	0.000115213	0.113485	0	0.113485
144_repUS22__rep(SAP015B)_GQ900502.1	plasmid	repUS22	0.00203046	0.000114208	0.0706999	0	0.112494
2806_tniA_FP929140.1	tniA	tniA	0.00203046	0.000114051	0.0627879	0	0.112341
1851_IS91_MQUF01000014.1	insertion_element_IS91	IS91	0.00507614	0.000113377	0.0439415	0	0.111676
2560_tnpA_JN630467.1	transposase	tnpA	0.00812183	0.000112818	0.0424896	0	0.111126
2725_IS91_MNUL01000039.1	insertion_element_IS91	IS91	0.0071066	0.000112791	0.0366567	0	0.111099
185_IncFIB(S)_1__FN432031	plasmid	IncFIB(S)	0.00304569	0.000112518	0.0393192	0	0.11083
1521_IS679_NC002142	IS679	IS679	0.00203046	0.000111321	0.0728595	0	0.109651
567_tnpA_CPVS01000003.1	transposase	tnpA	0.00304569	0.000110614	0.0804036	0	0.108955
918_tnpA_AJ439607.2	transposase	tnpA	0.00203046	0.00011042	0.069362	0	0.108764
259_Col(MP18)_1__NC_013652	plasmid	Col(MP18)	0.00101523	0.000110401	0.108745	0	0.108745
2700_tnpA_ADNY01000061.1	transposase	tnpA	0.00101523	0.000109426	0.107784	0	0.107784
1217_IS91_CP003879.1	insertion_element_IS91	IS91	0.00203046	0.00010932	0.0744239	0	0.10768
1376_tnpA_CCXZ01000025.1	transposase	tnpA	0.00507614	0.000109001	0.0448009	0	0.107366
2800_tniA_ALDS01000249.1	tniA	tniA	0.00101523	0.000108576	0.106947	0	0.106947
235_pJARS36_1__NC_015068	plasmid	pJARS36	0.00101523	0.000104549	0.102981	0	0.102981
2152_IS91_CP000316.1	insertion_element_IS91	IS91	0.00203046	0.000103364	0.088898	0	0.101814
1550_tnpA3_HE577054.1	transposase	tnpA3	0.00609137	0.000103266	0.0263175	0	0.101717
864_IS91_CU928147.1	insertion_element_IS91	IS91	0.00406091	0.000103194	0.0446615	0	0.101646
265_repA_2_pKPC-2_JX397875	plasmid	repA	0.00203046	0.000102398	0.0664725	0	0.100862
2056_ISPbu1_AEPD01000037	ISPbu1	ISPbu1	0.00203046	0.000100911	0.0509558	0	0.0993973
143_repUS21__rep(pWBG764)_GQ900468.1	plasmid	repUS21	0.00304569	0.00010091	0.070151	0	0.0993967
1329_tnpA_FR775234.1	transposase	tnpA	0.00101523	0.000100815	0.0993027	0	0.0993027
462_IS91_CP002738.1	insertion_element_IS91	IS91	0.00609137	0.00010039	0.0257407	0	0.0988838
2530_tnpA_AOCI01000035.1	transposase	tnpA	0.00609137	9.93696e-05	0.0388288	0	0.0978791
56_rep10b_1_rep(pSK3)_NC001994	plasmid	rep10b	0.00203046	9.90981e-05	0.050731	0	0.0976116
2343_tnpA_LXLF01000020.1	transposase	tnpA	0.0142132	9.86366e-05	0.028278	0	0.0971571
2520_IS91_CP000753.1	insertion_element_IS91	IS91	0.00203046	9.8549e-05	0.0821789	0	0.0970707
1039_int2_LN907827.1	integrase	int2	0.00101523	9.81472e-05	0.096675	0	0.096675
1841_tnpA_KJ439039.1	transposase	tnpA	0.0142132	9.70133e-05	0.0227312	0	0.0955581
2381_IS91_CP000529.1	insertion_element_IS91	IS91	0.00304569	9.6977e-05	0.0344601	0	0.0955223
232_pESA2_1__CP000784	plasmid	pESA2	0.00101523	9.64739e-05	0.0950268	0	0.0950268
225_pADAP_1__AF135182	plasmid	PADAP	0.00101523	9.64162e-05	0.09497	0	0.09497
312_IS91_MSKG01000291.1	insertion_element_IS91	IS91	0.00304569	9.64113e-05	0.0520211	0	0.0949652
1478_tnpA_JOQR01000001.1	transposase	tnpA	0.00203046	9.58519e-05	0.0812582	0	0.0944141
2522_tnpA_KX029332.1	transposase	tnpA	0.00406091	9.57458e-05	0.0576586	0	0.0943096
2730_tnpA_AOCI01000042.1	transposase	tnpA	0.0071066	9.51574e-05	0.0276812	0	0.09373
2758_tnpA_JNNA01000051.1	transposase	tnpA	0.00203046	9.41019e-05	0.0817979	0	0.0926903
2077_tnpA_KC958437.1	transposase	tnpA	0.00101523	9.37783e-05	0.0923716	0	0.0923716
1367_tnpA_AE014299.2	transposase	tnpA	0.00304569	9.31634e-05	0.0358004	0	0.091766
532_IS91_MQAA01000013.1	insertion_element_IS91	IS91	0.00304569	9.06112e-05	0.0383064	0	0.089252
1766_IS91_CP002738.1	insertion_element_IS91	IS91	0.00304569	9.03596e-05	0.055615	0	0.0890042
1741_IS91_LRLA01000044.1	insertion_element_IS91	IS91	0.00101523	8.92342e-05	0.0878956	0	0.0878956
207_IncFII(pRSB107)_1_pRSB107_AJ851089	plasmid	IncFII(pRSB107)	0.00101523	8.91393e-05	0.0878022	0	0.0878022
1950_IS91_HE970764.1	insertion_element_IS91	IS91	0.00203046	8.88335e-05	0.0567748	0	0.087501
1988_tnpA_AEQQ01000129.1	transposase	tnpA	0.00101523	8.85098e-05	0.0871822	0	0.0871822
935_tnpA_ACGS02000049.1	transposase	tnpA	0.00203046	8.7395e-05	0.0560721	0	0.0860841
1467_tnpA_ACZD01000117.1	transposase	tnpA	0.00101523	8.67197e-05	0.0854189	0	0.0854189
2774_tnpA_CDAH01000009.1	transposase	tnpA	0.00609137	8.60669e-05	0.0334646	0	0.0847759
1438_IS91_MQRH01000036.1	insertion_element_IS91	IS91	0.00304569	8.5993e-05	0.0531675	0	0.0847032
2245_tnpA_CP000042.1	transposase	tnpA	0.0152284	8.57891e-05	0.0224821	0	0.0845022
356_tnpA_7_2_LN890520.1	transposase	tnpA	0.00203046	8.45745e-05	0.0580888	0	0.0833059
1253_IS91_CP001087.1	insertion_element_IS91	IS91	0.00101523	8.41593e-05	0.0828969	0	0.0828969
518_IS91_FO203503.1	insertion_element_IS91	IS91	0.00101523	8.41593e-05	0.0828969	0	0.0828969
1688_IS91_CP000529.1	insertion_element_IS91	IS91	0.00101523	7.98305e-05	0.0786331	0	0.0786331
2172_tnpA_CYGX02000051.1	transposase	tnpA	0.0152284	7.95804e-05	0.0253232	0	0.0783867
1742_IS91_MJVB01000022.1	insertion_element_IS91	IS91	0.00507614	7.93559e-05	0.0231032	0	0.0781655
214_IncFII(pMET)_1_pMET1_EU383016	plasmid	IncFII(pMET)	0.00203046	7.88805e-05	0.0436535	0	0.0776973
1820_tnpA_AY437915.1	transposase	tnpA	0.00609137	7.88771e-05	0.0241915	0	0.077694
873_tnpA_CQAZ01000119.1	transposase	tnpA	0.00101523	7.8867e-05	0.077684	0	0.077684
1528_tnpA_JN849689.1	transposase	tnpA	0.00406091	7.87823e-05	0.0322993	0	0.0776005
2046_ISBf10_NC006347	ISBf10	ISBf10	0.00406091	7.81687e-05	0.0264307	0	0.0769962
1082_tnpA_CP015834.1	transposase	tnpA	0.00101523	7.81486e-05	0.0769763	0	0.0769763
2057_IS91_FN649418.1	insertion_element_IS91	IS91	0.00101523	7.72749e-05	0.0761158	0	0.0761158
2181_tnpA_AE014299.2	transposase	tnpA	0.00406091	7.56635e-05	0.0283421	0	0.0745285
2340_tnpA_AB238971.1	transposase	tnpA	0.0162437	7.55805e-05	0.0172209	0	0.0744468
1061_tnpA_KT965093.1	transposase	tnpA	0.00304569	7.47917e-05	0.043904	0	0.0736698
20_rep5_5_rep(pRJ6)_AF241888.2	plasmid	rep5	0.00304569	7.4109e-05	0.0248917	0	0.0729974
21_rep5_6_rep(pRJ9)_AF447813.1	plasmid	rep5	0.00203046	7.40374e-05	0.045856	0	0.0729268
1196_IS91_CP003740.1	insertion_element_IS91	IS91	0.00304569	7.32066e-05	0.0341639	0	0.0721085
2590_IS91_CP000697.1	insertion_element_IS91	IS91	0.00203046	7.21066e-05	0.0386179	0	0.071025
1247_IS91_CP003740.1	insertion_element_IS91	IS91	0.00203046	7.11152e-05	0.061234	0	0.0700485
967_tnpA_CAGD01000002.1	transposase	tnpA	0.00304569	7.05776e-05	0.0293449	0	0.069519
16_rep5_1_rep(pMW2)_NC005011	plasmid	rep5	0.00406091	7.02885e-05	0.0291587	0	0.0692342
1351_tnpA_JZEK01000012.1	transposase	tnpA	0.00203046	6.9963e-05	0.03631	0	0.0689136
1585_tnpA1000_KX709966.1	transposase	tnpA1000	0.00609137	6.96956e-05	0.045459	0	0.0686502
377_IS91_AFAS01000241.1	insertion_element_IS91	IS91	0.00101523	6.81983e-05	0.0671754	0	0.0671754
224_IncX4_2__FN543504	plasmid	IncX4	0.00101523	6.79629e-05	0.0669435	0	0.0669435
48_rep9_3_repA(pPD1)_D78016	plasmid	rep9	0.00203046	6.66167e-05	0.0435119	0	0.0656174
1402_IS91_CP000356.1	insertion_element_IS91	IS91	0.00101523	6.65254e-05	0.0655276	0	0.0655276
1617_tnpA_AOCI01000152.1	transposase	tnpA	0.00203046	6.62868e-05	0.0413336	0	0.0652925
537_IS91_APXD01000215.1	insertion_element_IS91	IS91	0.00101523	6.6106e-05	0.0651144	0	0.0651144
1566_ISBf10_NC006347	ISBf10	ISBf10	0.00101523	6.50109e-05	0.0640357	0	0.0640357
2653_IS91_APYA01000055.1	insertion_element_IS91	IS91	0.00101523	6.4846e-05	0.0638733	0	0.0638733
1040_tnpA_CAHS01000022.1	transposase	tnpA	0.00203046	6.44185e-05	0.0352016	0	0.0634522
2322_IS91_CP019242.1	insertion_element_IS91	IS91	0.00304569	6.31776e-05	0.0342988	0	0.06223
260_Col(KPHS6)_1__NC_016841	plasmid	Col(KPHS6)	0.00101523	6.21732e-05	0.0612406	0	0.0612406
1720_IS91_AQAX01000058.1	insertion_element_IS91	IS91	0.00101523	6.2091e-05	0.0611597	0	0.0611597
1551_tnpA_KF483599.2	transposase	tnpA	0.00406091	6.16932e-05	0.0241124	0	0.0607678
1686_tnpA_AE014299.2	transposase	tnpA	0.00203046	6.16736e-05	0.0463411	0	0.0607485
2475_tnpA_APFX01000025.1	transposase	tnpA	0.00101523	6.15264e-05	0.0606035	0	0.0606035
335_IS91_AQDA01000008.1	insertion_element_IS91	IS91	0.00101523	6.14399e-05	0.0605183	0	0.0605183
1690_tnpA_AE014299.2	transposase	tnpA	0.00304569	6.14375e-05	0.0356049	0	0.0605159
2122_IS91_CP018023.1	insertion_element_IS91	IS91	0.00406091	6.13537e-05	0.0358961	0	0.0604334
1006_tnpA_JX194160.1	transposase	tnpA	0.00101523	6.11028e-05	0.0601863	0	0.0601863
9_rep3_1_rep63A(pAW63)_BTH011655	plasmid	rep3	0.00913706	6.03952e-05	0.0170771	0	0.0594893
1405_IS91_JOSO01000047.1	insertion_element_IS91	IS91	0.00101523	6.02238e-05	0.0593205	0	0.0593205
133_repUS11__CDS16(pTEF3)_AE016832	plasmid	repUS11	0.00101523	5.97264e-05	0.0588306	0	0.0588306
1190_tnpA_HG322949.1	transposase	tnpA	0.00101523	5.95928e-05	0.0586989	0	0.0586989
856_tnpA_U05888.2	transposase	tnpA	0.00304569	5.87725e-05	0.0442438	0	0.057891
1320_IS91_CU928162.2	insertion_element_IS91	IS91	0.00101523	5.86532e-05	0.0577734	0	0.0577734
2766_tnpA_LN997849.1	transposase	tnpA	0.00812183	5.83208e-05	0.0191717	0	0.057446
1076_int2_CP003889.1	integrase	int2	0.00609137	5.81197e-05	0.0211455	0	0.0572479
541_tnpA_FP236842.1	transposase	tnpA	0.00609137	5.80864e-05	0.0168936	0	0.0572151
492_IS91_JNMV01000066.1	insertion_element_IS91	IS91	0.00101523	5.80211e-05	0.0571508	0	0.0571508
1379_tnpA_ALDG01000161.1	transposase	tnpA	0.00101523	5.66398e-05	0.0557902	0	0.0557902
2718_tnpA1_CP003730.1	transposase	tnpA1	0.00406091	5.59345e-05	0.0159212	0	0.0550955
190_IncFII(Y)_1_ps_CP001049	plasmid	IncFII(Y)	0.00101523	5.57133e-05	0.0548776	0	0.0548776
1969_tnpA_X87144.1	transposase	tnpA	0.00304569	5.54074e-05	0.0195604	0	0.0545763
2677_IS91_CP005973.1	insertion_element_IS91	IS91	0.00101523	5.46135e-05	0.0537943	0	0.0537943
1776_IS91_JOQL01000002.1	insertion_element_IS91	IS91	0.00101523	5.43164e-05	0.0535017	0	0.0535017
1375_tnpA_ADMU01000041.1	transposase	tnpA	0.00203046	5.36443e-05	0.0401254	0	0.0528397
1127_tnpA_AP014809.1	transposase	tnpA	0.00203046	5.30606e-05	0.0474709	0	0.0522647
2170_tnpA_CP003891.1	transposase	tnpA	0.00507614	5.2866e-05	0.0114091	0	0.052073
664_tnpA_KC609323.1	transposase	tnpA	0.00406091	5.28623e-05	0.0291163	0	0.0520694
200_IncFIB(pKPHS1)_1_pKPHS1_CP003223	plasmid	IncFIB(pKPHS1)	0.00101523	5.25897e-05	0.0518009	0	0.0518009
512_IS91_CP000913.1	insertion_element_IS91	IS91	0.00203046	5.23741e-05	0.0418455	0	0.0515885
731_tnpA_FN392238.1	transposase	tnpA	0.00304569	5.21384e-05	0.0299018	0	0.0513563
295_IS91_LGMM01000043.1	insertion_element_IS91	IS91	0.00101523	5.1856e-05	0.0510781	0	0.0510781
279_tnpA_M95402.1	transposase	tnpA	0.00507614	5.18102e-05	0.0228966	0	0.0510331
834_tnpA_AB262966.1	transposase	tnpA	0.00101523	5.0866e-05	0.050103	0	0.050103
2247_tnpA_CP000645.1	transposase	tnpA	0.00101523	5.08384e-05	0.0500758	0	0.0500758
32_rep7_9_CDS3(pUSA02)_NC007791	plasmid	rep7	0.00101523	5.05469e-05	0.0497887	0	0.0497887
1689_tnpA_AE014299.2	transposase	tnpA	0.00304569	5.02119e-05	0.0205283	0	0.0494588
2456_tnpA2_CP000831.1	transposase	tnpA2	0.00203046	5.00594e-05	0.0259357	0	0.0493086
1410_IS91_AQDE01000087.1	insertion_element_IS91	IS91	0.00101523	4.99711e-05	0.0492216	0	0.0492216
1505_tnpA_AMFJ01010795.1	transposase	tnpA	0.00406091	4.94443e-05	0.017827	0	0.0487027
311_IS91_LRLK01000111.1	insertion_element_IS91	IS91	0.00101523	4.90948e-05	0.0483584	0	0.0483584
53_rep10_4_repL(pDLK1)_GU562624.1	plasmid	rep10	0.00101523	4.80768e-05	0.0473556	0	0.0473556
1265_tniB_CP000630.1	tniB	tniB	0.00304569	4.78623e-05	0.0287289	0	0.0471444
1343_tnpA_5_FJNZ01000013.1	transposase	tnpA	0.00406091	4.70901e-05	0.0189546	0	0.0463838
788_tnpA_FIIQ01000003.1	transposase	tnpA	0.00101523	4.66783e-05	0.0459781	0	0.0459781
651_tnpA_JGDD01000078.1	transposase	tnpA	0.00101523	4.66042e-05	0.0459051	0	0.0459051
1864_tnpA_AIFX01000023.1	transposase	tnpA	0.00101523	4.64214e-05	0.0457251	0	0.0457251
86_rep19_5_rep(pWBG747)_GQ900399.1	plasmid	rep19	0.00203046	4.61582e-05	0.0229559	0	0.0454658
1643_tnpA_JEMY01000043.1	transposase	tnpA	0.0071066	4.60919e-05	0.01437	0	0.0454005
2126_IS91_FN822745.1	insertion_element_IS91	IS91	0.00101523	4.58334e-05	0.0451459	0	0.0451459
2551_tnpA_AJ430202.1	transposase	tnpA	0.00203046	4.58116e-05	0.0361581	0	0.0451244
310_IS91_LRLA01000003.1	insertion_element_IS91	IS91	0.00101523	4.49826e-05	0.0443079	0	0.0443079
2487_IS91_CP002527.1	insertion_element_IS91	IS91	0.00203046	4.49325e-05	0.022833	0	0.0442585
204_IncFIB(pB171)_1_pB171_AB024946	plasmid	IncFIB(pB171)	0.00203046	4.4539e-05	0.0370636	0	0.0438709
2023_tnpA_CP008760.1	transposase	tnpA	0.00101523	4.41355e-05	0.0434735	0	0.0434735
1658_tnpA5_HG918041.1	transposase	tnpA5	0.00101523	4.40922e-05	0.0434308	0	0.0434308
120_rep23_2_rep(pV030-8)_EU366902.1	plasmid	rep23	0.00101523	4.38343e-05	0.0431768	0	0.0431768
1014_IS91_LGMY01000167.1	insertion_element_IS91	IS91	0.00101523	4.3749e-05	0.0430928	0	0.0430928
2744_tnpA_AY033500.1	transposase	tnpA	0.00101523	4.35349e-05	0.0428819	0	0.0428819
72_rep16_1_CDS8(pSAS)_BX571858	plasmid	rep16	0.00203046	4.34187e-05	0.0374874	0	0.0427674
1695_tnpA_AE014299.2	transposase	tnpA	0.00101523	4.19512e-05	0.0413219	0	0.0413219
1472_tnpA_AQDS01000033.1	transposase	tnpA	0.00101523	4.17813e-05	0.0411545	0	0.0411545
73_rep16_2_CDS6(pSJH101)_CP000737	plasmid	rep16	0.00203046	4.09454e-05	0.0297711	0	0.0403312
1944_IS91_AP014804.1	insertion_element_IS91	IS91	0.00101523	4.0732e-05	0.040121	0	0.040121
436_IS91_AOGM01000145.1	insertion_element_IS91	IS91	0.00101523	4.0732e-05	0.040121	0	0.040121
396_IS91_LGMC01000131.1	insertion_element_IS91	IS91	0.00203046	4.02213e-05	0.0205399	0	0.039618
2574_ISSfl3_AL391753	ISSfl3	ISSfl3	0.00101523	4.01614e-05	0.039559	0	0.039559
2034_tnpA1_ADFW01000001.1	transposase	tnpA1	0.00812183	3.99689e-05	0.00857673	0	0.0393693
871_tnpA_AY779042.1	transposase	tnpA	0.00304569	3.9828e-05	0.0171379	0	0.0392306
1479_tnpA_AB031212.1	transposase	tnpA	0.00203046	3.95901e-05	0.0291597	0	0.0389962
303_IS91_CP001383.1	insertion_element_IS91	IS91	0.00203046	3.94832e-05	0.0306452	0	0.038891
515_IS91_MIWW01000160.1	insertion_element_IS91	IS91	0.00101523	3.94695e-05	0.0388775	0	0.0388775
968_tnpA_Z17279.1	transposase	tnpA	0.00304569	3.94106e-05	0.0221379	0	0.0388195
2048_IS91_LGMW01000166.1	insertion_element_IS91	IS91	0.00101523	3.84394e-05	0.0378628	0	0.0378628
203_IncFIB(pENTE01)_1_pENTE01_CP000654	plasmid	IncFIB(pENTE01)	0.00203046	3.82455e-05	0.0308474	0	0.0376719
1289_tnpA_GQ468938.1	transposase	tnpA	0.00304569	3.78031e-05	0.0263621	0	0.037236
855_IS91_CXZV01000067.1	insertion_element_IS91	IS91	0.00101523	3.77987e-05	0.0372317	0	0.0372317
1355_ISUnb4_LPNI01000100	ISUnb4	ISUnb4	0.00203046	3.7124e-05	0.0247845	0	0.0365672
1291_IS91_AHIE01000006.1	insertion_element_IS91	IS91	0.00203046	3.67328e-05	0.0295699	0	0.0361818
1810_IS91_CP000891.1	insertion_element_IS91	IS91	0.00101523	3.66694e-05	0.0361193	0	0.0361193
1420_IS91_CP003742.1	insertion_element_IS91	IS91	0.00304569	3.65368e-05	0.0213069	0	0.0359888
1051_tnpA_AKTZ01000001.1	transposase	tnpA	0.00304569	3.63321e-05	0.0184694	0	0.0357871
154_IncL/M(pOXA-48)_1_pOXA-48_JN626286	plasmid	IncL/M(pOXA-48)	0.00101523	3.58168e-05	0.0352796	0	0.0352796
1115_tnpA_CCDS01000003.1	transposase	tnpA	0.00101523	3.40995e-05	0.033588	0	0.033588
111_rep21_9_rep(pKH12)_EU168704.2	plasmid	rep21	0.00304569	3.38948e-05	0.0222387	0	0.0333864
705_tnpA_HE613569.1	transposase	tnpA	0.00101523	3.34392e-05	0.0329376	0	0.0329376
1945_IS91_CP002738.1	insertion_element_IS91	IS91	0.00101523	3.28132e-05	0.032321	0	0.032321
191_IncL/M(pMU407)_1_pMU407_U27345	plasmid	IncL/M(pMU407)	0.00101523	3.27878e-05	0.032296	0	0.032296
255_Col(pWES)_1__DQ268764	plasmid	Col(pWES)	0.00101523	3.20444e-05	0.0315637	0	0.0315637
925_tnpA_CP002124.1	transposase	tnpA	0.00101523	3.17044e-05	0.0312289	0	0.0312289
83_rep19_2_rep(pSA1379)_NC007931	plasmid	rep19	0.00203046	3.16073e-05	0.0271409	0	0.0311332
2231_tnpA_AB024564.1	transposase	tnpA	0.00101523	3.1454e-05	0.0309822	0	0.0309822
1244_IS91_CP000529.1	insertion_element_IS91	IS91	0.00101523	3.12288e-05	0.0307604	0	0.0307604
182_IncX3_1__JN247852	plasmid	IncX3	0.00101523	3.08281e-05	0.0303657	0	0.0303657
75_rep16_4_unknown(SAP056A)_GQ900478.1	plasmid	rep16	0.00101523	3.02245e-05	0.0297711	0	0.0297711
2651_IS91_CP002349.1	insertion_element_IS91	IS91	0.00203046	2.9474e-05	0.0156407	0	0.0290319
1066_IS91_CP001350.1	insertion_element_IS91	IS91	0.00101523	2.92105e-05	0.0287724	0	0.0287724
2329_tnpA_AE014299.2	transposase	tnpA	0.00101523	2.91633e-05	0.0287258	0	0.0287258
780_IS91_MIIY01000592.1	insertion_element_IS91	IS91	0.00101523	2.85074e-05	0.0280798	0	0.0280798
37_rep7_14_rep(MSSA476)_BX571857.1	plasmid	rep7	0.00304569	2.84015e-05	0.0109978	0	0.0279755
49_rep9_4_repA2(pTEF2)_AE016831	plasmid	rep9	0.00203046	2.80246e-05	0.0219087	0	0.0276042
2780_tnpA_HE999757.2	transposase	tnpA	0.00304569	2.72152e-05	0.0116839	0	0.0268069
181_IncN3_1__EF219134	plasmid	IncN3	0.00101523	2.71723e-05	0.0267647	0	0.0267647
2260_tniB_FP929140.1	tniB	tniB	0.00203046	2.71424e-05	0.0134006	0	0.0267353
1555_tnpA_AJ849659.1	transposase	tnpA	0.00304569	2.68849e-05	0.0110718	0	0.0264816
132_repUS10__CDS25(pSSP1)_AP008935	plasmid	repUS10	0.00203046	2.68206e-05	0.0174958	0	0.0264183
1191_IS679_NC002142	IS679	IS679	0.00203046	2.67984e-05	0.0196623	0	0.0263964
328_tnpA_AL513382.1	transposase	tnpA	0.00101523	2.67887e-05	0.0263869	0	0.0263869
772_IS91_CP002616.1	insertion_element_IS91	IS91	0.00101523	2.66023e-05	0.0262033	0	0.0262033
2003_tnpA_CP016447.1	transposase	tnpA	0.00101523	2.65394e-05	0.0261414	0	0.0261414
1298_tnpA_12_CP012683.1	transposase	tnpA	0.00203046	2.64422e-05	0.0241426	0	0.0260456
2536_tnpA_AY850399.1	transposase	tnpA	0.00304569	2.64394e-05	0.0116553	0	0.0260428
2224_tnpA_BX950851.1	transposase	tnpA	0.00101523	2.62283e-05	0.0258349	0	0.0258349
1157_tnpA_JIDP01000002.1	transposase	tnpA	0.00101523	2.58784e-05	0.0254902	0	0.0254902
465_IS91_LRKZ01000069.1	insertion_element_IS91	IS91	0.00101523	2.58477e-05	0.02546	0	0.02546
1818_tnpA_7_10_LN890520.1	transposase	tnpA	0.00101523	2.57897e-05	0.0254028	0	0.0254028
1681_tnpA_AE014299.2	transposase	tnpA	0.00203046	2.57772e-05	0.0152279	0	0.0253905
2298_int3_CP002206.1	integrase	int3	0.00203046	2.54568e-05	0.0150257	0	0.0250749
219_IncFII(SARC14)_1_SARC14_JQ418540	plasmid	IncFII(SARC14)	0.00101523	2.54466e-05	0.0250649	0	0.0250649
1245_IS91_AQAW01000167.1	insertion_element_IS91	IS91	0.00101523	2.48686e-05	0.0244955	0	0.0244955
1963_tnpA_CELV01000211.1	transposase	tnpA	0.00101523	2.46382e-05	0.0242686	0	0.0242686
416_IS91_MOLD01000168.1	insertion_element_IS91	IS91	0.00203046	2.45658e-05	0.0200605	0	0.0241973
2113_IS91_MOIY01000074.1	insertion_element_IS91	IS91	0.00203046	2.44545e-05	0.0198568	0	0.0240877
814_IS91_CP002383.1	insertion_element_IS91	IS91	0.00101523	2.44122e-05	0.024046	0	0.024046
2142_IS91_CP000724.1	insertion_element_IS91	IS91	0.00101523	2.41527e-05	0.0237904	0	0.0237904
464_tnpA_CP001603.1	transposase	tnpA	0.00304569	2.39975e-05	0.0104838	0	0.0236375
1256_IS91_LGTC01000001.1	insertion_element_IS91	IS91	0.00101523	2.38526e-05	0.0234948	0	0.0234948
95_rep20_4_repA(SAP102A)_GQ900496.1	plasmid	rep20	0.00101523	2.37958e-05	0.0234388	0	0.0234388
96_rep20_5_repA(pSK23)_GQ900491.1	plasmid	rep20	0.00101523	2.37958e-05	0.0234388	0	0.0234388
97_rep20_6_repA(SAP059A)_GQ900480.1	plasmid	rep20	0.00101523	2.37958e-05	0.0234388	0	0.0234388
523_IS91_CP003742.1	insertion_element_IS91	IS91	0.00101523	2.36931e-05	0.0233377	0	0.0233377
1364_tnpA_LN681228.1	transposase	tnpA	0.00304569	2.36092e-05	0.0189724	0	0.0232551
1078_int3_CP013672.1	integrase	int3	0.00101523	2.29207e-05	0.0225768	0	0.0225768
293_IS91_GQ259888.1	insertion_element_IS91	IS91	0.00203046	2.27772e-05	0.0126926	0	0.0224356
2268_tnpA_AYLO01000021.1	transposase	tnpA	0.0071066	2.23563e-05	0.00740082	0	0.0220209
1406_IS91_ANZB01000012.1	insertion_element_IS91	IS91	0.00101523	2.22557e-05	0.0219218	0	0.0219218
2155_IS91_MKQI01000024.1	insertion_element_IS91	IS91	0.00203046	2.13811e-05	0.0169235	0	0.0210603
76_rep16_5_unknown(pWBG759)_GQ900401.1	plasmid	rep16	0.00203046	2.07493e-05	0.010447	0	0.0204381
1807_int3_CP003840.1	integrase	int3	0.00101523	2.0713e-05	0.0204023	0	0.0204023
784_tnpA_KJ541070.1	transposase	tnpA	0.00304569	1.99321e-05	0.00797153	0	0.0196332
2067_IS26_KF056330.2	IS26	IS26	0.00101523	1.97886e-05	0.0194918	0	0.0194918
2180_tnpA_Y17746.1	transposase	tnpA	0.00101523	1.94845e-05	0.0191922	0	0.0191922
2293_IS91_CP018091.1	insertion_element_IS91	IS91	0.00101523	1.94825e-05	0.0191902	0	0.0191902
2273_tnpA_JYHQ01000107.1	transposase	tnpA	0.00406091	1.9308e-05	0.0085604	0	0.0190184
1724_IS91_LRKE01000216.1	insertion_element_IS91	IS91	0.00101523	1.90891e-05	0.0188028	0	0.0188028
1407_IS91_AESD01000951.1	insertion_element_IS91	IS91	0.00203046	1.88866e-05	0.0131295	0	0.0186033
472_IS91_FN822745.1	insertion_element_IS91	IS91	0.00101523	1.87604e-05	0.018479	0	0.018479
488_IS91_LRMA01000117.1	insertion_element_IS91	IS91	0.00101523	1.81432e-05	0.0178711	0	0.0178711
943_tnpA_AM286430.1	transposase	tnpA	0.00203046	1.75759e-05	0.0116982	0	0.0173123
866_tnpA_KT818596.1	transposase	tnpA	0.00101523	1.71756e-05	0.016918	0	0.016918
640_tnpA_AL513382.1	transposase	tnpA	0.00101523	1.69574e-05	0.0167031	0	0.0167031
425_IS91_AQDR01000015.1	insertion_element_IS91	IS91	0.00101523	1.66759e-05	0.0164258	0	0.0164258
2803_tnpA1_CP001894.1	transposase	tnpA1	0.00101523	1.62385e-05	0.0159949	0	0.0159949
599_IS91_CP004852.1	insertion_element_IS91	IS91	0.00101523	1.61257e-05	0.0158838	0	0.0158838
1119_tnpA_CP007448.1	transposase	tnpA	0.00101523	1.54321e-05	0.0152006	0	0.0152006
306_IS91_LRLW01000235.1	insertion_element_IS91	IS91	0.00101523	1.5179e-05	0.0149513	0	0.0149513
1862_tnpA_CP001879.1	transposase	tnpA	0.00203046	1.50918e-05	0.00842176	0	0.0148654
2378_IS91_CP005973.1	insertion_element_IS91	IS91	0.00101523	1.49432e-05	0.0147191	0	0.0147191
1729_IS91_CP000267.1	insertion_element_IS91	IS91	0.00101523	1.48635e-05	0.0146405	0	0.0146405
1948_tnpA_JOQE01000050.1	transposase	tnpA	0.00101523	1.48155e-05	0.0145933	0	0.0145933
2658_IS91_KX957971.1	insertion_element_IS91	IS91	0.00101523	1.46536e-05	0.0144338	0	0.0144338
2069_IS91_CP017269.1	insertion_element_IS91	IS91	0.00304569	1.44484e-05	0.00527369	0	0.0142316
84_rep19_3_CDS20(pSJH901)_CP000704	plasmid	rep19	0.00101523	1.39625e-05	0.0137531	0	0.0137531
2720_IS91_AQAT01000121.1	insertion_element_IS91	IS91	0.00101523	1.39421e-05	0.013733	0	0.013733
1867_IS91_CP003879.1	insertion_element_IS91	IS91	0.00101523	1.39278e-05	0.0137189	0	0.0137189
1540_tnpA_CP000646.1	transposase	tnpA	0.00507614	1.38641e-05	0.0059885	0	0.0136561
1232_tnpA(ISRSB101-1)_AJ698325.1	transposase	tnpA(ISRSB101-1)	0.00101523	1.38368e-05	0.0136293	0	0.0136293
1057_int3_HE577054.1	integrase	int3	0.00101523	1.32839e-05	0.0130846	0	0.0130846
1554_IS91_LT670843.1	insertion_element_IS91	IS91	0.00203046	1.32719e-05	0.00980349	0	0.0130728
2641_IS91_MJVB01000045.1	insertion_element_IS91	IS91	0.00101523	1.3135e-05	0.012938	0	0.012938
570_IS91_LRKX01000162.1	insertion_element_IS91	IS91	0.00101523	1.28859e-05	0.0126926	0	0.0126926
1630_IS91_LRLC01000007.1	insertion_element_IS91	IS91	0.00101523	1.2789e-05	0.0125972	0	0.0125972
2308_tnpA_CCES01000010.1	transposase	tnpA	0.00101523	1.26207e-05	0.0124314	0	0.0124314
98_rep20_7_repA(SAP074A)_GQ900426.1	plasmid	rep20	0.00101523	1.21314e-05	0.0119494	0	0.0119494
1717_tnpA_AE014299.2	transposase	tnpA	0.00101523	1.17038e-05	0.0115283	0	0.0115283
988_IS91_AP012547.1	insertion_element_IS91	IS91	0.00101523	1.13943e-05	0.0112234	0	0.0112234
1457_IS91_MQRH01000053.1	insertion_element_IS91	IS91	0.00101523	1.1285e-05	0.0111157	0	0.0111157
1281_tnpA1_CAGD01000038.1	transposase	tnpA1	0.00101523	1.08273e-05	0.0106649	0	0.0106649
22_rep5_7_rep(pJE1)_AF051916.1	plasmid	rep5	0.00101523	1.07971e-05	0.0106351	0	0.0106351
2027_IS91_MOCX01000041.1	insertion_element_IS91	IS91	0.00101523	1.07668e-05	0.0106053	0	0.0106053
2778_tnpA_CP002124.1	transposase	tnpA	0.00101523	1.07462e-05	0.010585	0	0.010585
343_tnpA_KJ933392.1	transposase	tnpA	0.00101523	1.06763e-05	0.0105161	0	0.0105161
[truncated: 24 more rows]
