# Supplementary material for: Global health risk assessment of antibiotic resistance in agricultural soils
Source: Research Square preprint supplement (doi:10.21203/rs.3.rs-7635655/v1), 2025-10-13
Supplement: Supplementary file 4 [file 2c5f4a9b5c1e2950d69652ab.xlsx]

## Sheet: Supplementary Table 7
Supplementary Table 7 High-risk ARG families identified according to the World Health Organization (WHO)
Aminoglycoside	β-lactam	Chloramphenicol	Colistin	MLS	Multidrug	Quinolone	Tetracycline	Trimethoprim	Vancomycin
aac(3)-II	bacA	catA	mcr-1	ermB	ermB-qacA	qnrA	tetL	dfrA1	vanY
aac(3)-VI	blaZ	catB		ermC	mdtE	qnrB	tetM	dfrA5
aac(6')-I	CMY-4	cmlA		ermT	mdtL	qnrS		dfrA12
aadE	CMY-6	floR		lnuA	mepA			dfrA14
ant(2'')-I	CMY-111			lnuB	norA			dfrA15
aph(3')-I	CTX-M-2			mphA	TolC			dfrA17
aph(3')-III	CTX-M-15			mphB				dfrA25
aph(6)-I	CTX-M-24			msrA				dfrB1
rmtF	CTX-M-55
rmtG	CTX-M-129
	GES-11
	IMP-4
	KPC-2
	KPC-4
	KPC-6
	mecA
	mecR1
	NDM-5
	NDM-6
	OXA-1
	OXA-4
	OXA-10
	SHV-1
	SHV-5
	TEM-156
	TEM-169
	VEB-3
	VIM-1
	VIM-2
