# Supplementary material for: Global health risk assessment of antibiotic resistance in agricultural soils
Source: Research Square preprint supplement (doi:10.21203/rs.3.rs-7635655/v1), 2025-10-13
Supplement: Supplementary file 6 [file 93dcdc517c25a6c0b67e868d.xlsx]

## Sheet: Supplementary Table 6
Supplementary Table 6 Microorganism in Phylum level detected in this study
Microorganism	Detected Account	Average	Max	Min	Total
Pseudomonadota	1	3.87813e+06	19230052	52681	3691977350
Actinomycetota	1	3.80557e+06	21583270	2977	3622905229
Myxococcota	1	235042	1732478	12	223759970
Planctomycetota	1	168542	863662	23	160452183
Bacillota	1	163826	5568067	2707	155961909
Bacteroidota	1	158624	3044678	4187	151009971
Acidobacteriota	1	87287.8	542695	6	83098006
Euryarchaeota	1	70895.9	506528	49	67492941
Thermodesulfobacteriota	1	65084.1	839521	44	61960081
Chordata	1	53095.1	768104	1520	50546576
Cyanobacteriota	1	41142.2	689987	284	39167370
Gemmatimonadota	0.99895	36189.8	391727	0	34452653
Verrucomicrobiota	1	33257.7	248268	18	31661354
Deinococcota	1	26673.8	239144	15	25393439
Chloroflexota	1	17042.2	150115	5	16224127
Nitrososphaerota	0.99895	16302.5	394992	0	15519982
Nitrospirota	1	8253.24	86644	2	7857083
Thermomicrobiota	0.99895	4440.31	49660	0	4227178
Campylobacterota	1	3679.02	214389	114	3502428
Spirochaetota	1	3602.83	33237	12	3429890
Uroviricota	1	3380.59	35552	65	3218319
Chlorobiota	1	2951.98	22253	1	2810288
Synergistota	1	2558	19415	4	2435218
Bdellovibrionota	1	1652.77	35555	3	1573436
Mycoplasmatota	1	1568.57	331899	15	1493282
Armatimonadota	0.99895	1521.81	8719	0	1448761
Kiritimatiellota	1	899.689	7610	2	856504
Thermoproteota	1	886.05	5522	3	843520
Thermotogota	1	758.205	7280	10	721811
Chlamydiota	1	587.517	8049	1	559316
Fusobacteriota	1	571.712	44093	9	544270
Candidatus Saccharibacteria	1	552.746	10502	4	526214
Aquificota	1	420.729	3519	2	400534
Candidatus Bipolaricaulota	0.99895	420.546	3090	0	400360
Ignavibacteriota	0.99895	301.908	12165	0	287416
Deferribacterota	0.99895	284.564	3318	0	270905
Peploviricota	0.99895	263.07	1298	0	250443
Calditrichota	0.99895	260.255	2644	0	247763
Chrysiogenota	0.99895	221.088	2264	0	210476
Candidatus Omnitrophica	0.99895	205.516	2372	0	195651
Balneolota	0.99895	202.241	1355	0	192533
Nucleocytoviricota	0.99895	180.503	1449	0	171839
Candidatus Thermoplasmatota	1	135.009	2445	1	128529
Elusimicrobiota	1	126.145	1263	2	120090
Fibrobacterota	0.99895	122.367	2515	0	116493
Lentisphaerota	0.99895	54.1218	479	0	51524
Dictyoglomota	0.997899	53.6387	539	0	51064
Caldisericota	0.997899	51.3214	472	0	48858
Atribacterota	0.996849	47.292	652	0	45022
Candidatus Cloacimonetes	0.99895	46.4013	707	0	44174
Coprothermobacterota	0.99895	38.8592	344	0	36994
Candidatus Absconditabacteria	0.995798	37.5294	289	0	35728
Preplasmiviricota	0.994748	33.8235	643	0	32200
Heterolobosea	0.907563	27.6345	1615	0	26308
Pisuviricota	0.993697	16.4842	254	0	15693
Cressdnaviricota	0.859244	16.1239	5448	0	15350
Kitrinoviricota	0.987395	14.5473	113	0	13849
Candidatus Lokiarchaeota	0.963235	14.4559	275	0	13762
Negarnaviricota	0.976891	11.8183	801	0	11251
Dividoviricota	0.951681	11.1586	80	0	10623
Candidatus Micrarchaeota	0.939076	10.1303	124	0	9644
Cossaviricota	0.917017	10	1263	0	9520
Artverviricota	0.778361	7.80777	1386	0	7433
Duplornaviricota	0.92437	7.26261	73	0	6914
Candidatus Korarchaeota	0.920168	7.05462	73	0	6716
Nanoarchaeota	0.740546	5.5042	122	0	5240
Phixviricota	0.408613	5.19433	243	0	4945
Candidatus Nanohaloarchaeota	0.803571	4.19013	56	0	3989
Saleviricota	0.685924	2.8855	22	0	2747
Taleaviricota	0.703782	2.65651	22	0	2529
Hofneiviricota	0.461134	1.58613	312	0	1510
Lenarviricota	0.264706	0.445378	8	0	424
Streptophyta	0.0640756	0.431723	273	0	411
Bacillariophyta	0.0493697	0.106092	8	0	101
Evosea	0.0357143	0.0483193	4	0	46
	0
