# Supplementary material for: Global health risk assessment of antibiotic resistance in agricultural soils
Source: Research Square preprint supplement (doi:10.21203/rs.3.rs-7635655/v1), 2025-10-13
Supplement: Supplementary file 7 [file c59834255570377fb899d4c5.xlsx]

## Sheet: Supplementary Table 2
Supplementary Table 2 ARGs types detected in this study
ARGs Types	Detected Frequency	Average	Max	Min	Total
aminoglycoside	0.97868	32.1177	4875.72	0	31636
multidrug	1	31.9486	4029.34	5.93773	31469.4
MLS	1	31.735	5210.36	0.824624	31259
tetracycline	1	29.0723	2324.36	0.51659	28636.2
rifamycin	0.998985	16.8857	129.817	0	16632.4
sulfonamide	0.768528	15.8589	1777.97	0	15621
bacitracin	1	14.7022	606.727	1.4958	14481.7
novobiocin	0.99797	10.0671	66.3106	0	9916.05
β-lactam	0.99797	9.26135	833.081	0	9122.43
florfenicol	0.48934	8.4771	1110.77	0	8349.94
polymyxin	1	7.95584	1158.54	0.789566	7836.5
vancomycin	0.979695	6.65838	48.7739	0	6558.5
chloramphenicol	0.770558	5.82717	666.602	0	5739.76
trimethoprim	0.700508	3.65363	409.385	0	3598.83
fosfomycin	0.673096	2.25598	510.126	0	2222.14
mupirocin	0.993909	2.24181	27.3861	0	2208.18
quinolone	0.986802	1.99793	34.1805	0	1967.96
bleomycin	0.168528	1.62745	645.107	0	1603.04
streptothricin	0.227411	0.856445	211.043	0	843.598
other peptide antibiotics	0.396954	0.577051	457.978	0	568.395
tetracenomycin C	0.856853	0.576933	7.70741	0	568.279
pleuromutilin tiamulin	0.857868	0.274022	6.91138	0	269.912
puromycin	0.492386	0.0523011	5.26569	0	51.5165
antibacterial fatty acid	0.381726	0.0261509	0.519909	0	25.7586
factumycin	0.227411	0.0210002	0.717873	0	20.6852
defensin	0.241624	0.0174359	1.13743	0	17.1743
fusidic_acid	0.0304569	0.0031434	0.622478	0	3.09625
bicyclomycin	0.0243655	0.00224994	0.581842	0	2.21619
tunicamycin	0.0172589	0.00133167	0.228764	0	1.31169
edeine	0.00304569	0.000163549	0.0615005	0	0.161096
