# Supplementary material for: Global health risk assessment of antibiotic resistance in agricultural soils
Source: Research Square preprint supplement (doi:10.21203/rs.3.rs-7635655/v1), 2025-10-13
Supplement: Supplementary file 8 [file c8f216dfe708cedc261cafc1.xlsx]

## Sheet: Sheet1
Supplementary Table 8 Grid search results of random forest
n_estimators	min_samples_split	max_depth	min_samples_leaf	Cross-validation accuracy
120	2	3	1	0.550289
300	2	3	1	0.55234
500	2	3	1	0.55334
800	2	3	1	0.552319
1200	2	3	1	0.547269
120	5	3	1	0.552329
300	5	3	1	0.549278
500	5	3	1	0.550289
800	5	3	1	0.548258
1200	5	3	1	0.548279
120	10	3	1	0.551319
300	10	3	1	0.549278
500	10	3	1	0.55334
800	10	3	1	0.550289
1200	10	3	1	0.549289
120	15	3	1	0.550299
300	15	3	1	0.549258
500	15	3	1	0.551309
800	15	3	1	0.549268
1200	15	3	1	0.549289
120	100	3	1	0.543156
300	100	3	1	0.541115
500	100	3	1	0.540105
800	100	3	1	0.542125
1200	100	3	1	0.542136
120	2	3	2	0.549278
300	2	3	2	0.550299
500	2	3	2	0.55538
800	2	3	2	0.549289
1200	2	3	2	0.548279
120	5	3	2	0.550289
300	5	3	2	0.549278
500	5	3	2	0.55335
800	5	3	2	0.548268
1200	5	3	2	0.548279
120	10	3	2	0.549278
300	10	3	2	0.549278
500	10	3	2	0.55334
800	10	3	2	0.550299
1200	10	3	2	0.549289
120	15	3	2	0.550299
300	15	3	2	0.551299
500	15	3	2	0.551309
800	15	3	2	0.549278
1200	15	3	2	0.548279
120	100	3	2	0.543156
300	100	3	2	0.541115
500	100	3	2	0.540105
800	100	3	2	0.542125
1200	100	3	2	0.542136
120	2	3	5	0.549268
300	2	3	5	0.55334
500	2	3	5	0.552329
800	2	3	5	0.55234
1200	2	3	5	0.547258
120	5	3	5	0.549268
300	5	3	5	0.55334
500	5	3	5	0.552329
800	5	3	5	0.55234
1200	5	3	5	0.547258
120	10	3	5	0.549268
300	10	3	5	0.55334
500	10	3	5	0.552329
800	10	3	5	0.55234
1200	10	3	5	0.547258
120	15	3	5	0.549268
300	15	3	5	0.552319
500	15	3	5	0.552329
800	15	3	5	0.552329
1200	15	3	5	0.547258
120	100	3	5	0.543156
300	100	3	5	0.541115
500	100	3	5	0.539085
800	100	3	5	0.542125
1200	100	3	5	0.541115
120	2	3	10	0.548248
300	2	3	10	0.55435
500	2	3	10	0.55334
800	2	3	10	0.549289
1200	2	3	10	0.550299
120	5	3	10	0.548248
300	5	3	10	0.55435
500	5	3	10	0.55334
800	5	3	10	0.549289
1200	5	3	10	0.550299
120	10	3	10	0.548248
300	10	3	10	0.55435
500	10	3	10	0.55334
800	10	3	10	0.549289
1200	10	3	10	0.550299
120	15	3	10	0.548248
300	15	3	10	0.55435
500	15	3	10	0.55334
800	15	3	10	0.549289
1200	15	3	10	0.550299
120	100	3	10	0.542136
300	100	3	10	0.539085
500	100	3	10	0.539085
800	100	3	10	0.539074
1200	100	3	10	0.541115
120	2	5	1	0.587776
300	2	5	1	0.588837
500	2	5	1	0.592909
800	2	5	1	0.593898
1200	2	5	1	0.591878
120	5	5	1	0.588827
300	5	5	1	0.592898
500	5	5	1	0.595929
800	5	5	1	0.591868
1200	5	5	1	0.593898
120	10	5	1	0.585786
300	10	5	1	0.594949
500	10	5	1	0.598
800	10	5	1	0.589837
1200	10	5	1	0.588817
120	15	5	1	0.588848
300	15	5	1	0.587838
500	15	5	1	0.590878
800	15	5	1	0.591888
1200	15	5	1	0.588837
120	100	5	1	0.564471
300	100	5	1	0.568543
500	100	5	1	0.567512
800	100	5	1	0.568532
1200	100	5	1	0.568543
120	2	5	2	0.591847
300	2	5	2	0.592909
500	2	5	2	0.593908
800	2	5	2	0.591878
1200	2	5	2	0.592888
120	5	5	2	0.60001
300	5	5	2	0.591888
500	5	5	2	0.592888
800	5	5	2	0.592878
1200	5	5	2	0.592867
120	10	5	2	0.587838
300	10	5	2	0.593919
500	10	5	2	0.594929
800	10	5	2	0.590847
1200	10	5	2	0.594908
120	15	5	2	0.588837
300	15	5	2	0.589878
500	15	5	2	0.591909
800	15	5	2	0.591909
1200	15	5	2	0.585786
120	100	5	2	0.565481
300	100	5	2	0.568543
500	100	5	2	0.567512
800	100	5	2	0.568532
1200	100	5	2	0.568543
120	2	5	5	0.585797
300	2	5	5	0.584766
500	2	5	5	0.587796
800	2	5	5	0.588806
1200	2	5	5	0.588806
120	5	5	5	0.585797
300	5	5	5	0.584766
500	5	5	5	0.587796
800	5	5	5	0.588806
1200	5	5	5	0.588806
120	10	5	5	0.585797
300	10	5	5	0.584766
500	10	5	5	0.587796
800	10	5	5	0.588806
1200	10	5	5	0.588806
120	15	5	5	0.583746
300	15	5	5	0.583766
500	15	5	5	0.588837
800	15	5	5	0.584756
1200	15	5	5	0.585766
120	100	5	5	0.565481
300	100	5	5	0.567522
500	100	5	5	0.565492
800	100	5	5	0.568532
1200	100	5	5	0.569553
120	2	5	10	0.582797
300	2	5	10	0.585807
500	2	5	10	0.581756
800	2	5	10	0.580715
1200	2	5	10	0.580715
120	5	5	10	0.582797
300	5	5	10	0.585807
500	5	5	10	0.581756
800	5	5	10	0.580715
1200	5	5	10	0.580715
120	10	5	10	0.582797
300	10	5	10	0.585807
500	10	5	10	0.581756
800	10	5	10	0.580715
1200	10	5	10	0.580715
120	15	5	10	0.582797
300	15	5	10	0.585807
500	15	5	10	0.581756
800	15	5	10	0.580715
1200	15	5	10	0.580715
120	100	5	10	0.568543
300	100	5	10	0.569553
500	100	5	10	0.568522
800	100	5	10	0.568532
1200	100	5	10	0.567512
120	2	8	1	0.615265
300	2	8	1	0.614244
500	2	8	1	0.614234
800	2	8	1	0.610194
1200	2	8	1	0.611204
120	5	8	1	0.609163
300	5	8	1	0.611214
500	5	8	1	0.609194
800	5	8	1	0.608174
1200	5	8	1	0.611204
120	10	8	1	0.611214
300	10	8	1	0.610194
500	10	8	1	0.612214
800	10	8	1	0.611173
1200	10	8	1	0.609142
120	15	8	1	0.615306
300	15	8	1	0.615296
500	15	8	1	0.616296
800	15	8	1	0.614255
1200	15	8	1	0.616254
120	100	8	1	0.562451
300	100	8	1	0.564482
500	100	8	1	0.563482
800	100	8	1	0.565481
1200	100	8	1	0.563441
120	2	8	2	0.619326
300	2	8	2	0.618295
500	2	8	2	0.618295
800	2	8	2	0.615265
1200	2	8	2	0.615265
120	5	8	2	0.608153
300	5	8	2	0.612245
500	5	8	2	0.609194
800	5	8	2	0.611214
1200	5	8	2	0.613245
120	10	8	2	0.606122
300	10	8	2	0.613224
500	10	8	2	0.613234
800	10	8	2	0.617275
1200	10	8	2	0.616265
120	15	8	2	0.614234
300	15	8	2	0.615275
500	15	8	2	0.615265
800	15	8	2	0.617275
1200	15	8	2	0.617275
120	100	8	2	0.562451
300	100	8	2	0.564482
500	100	8	2	0.563482
800	100	8	2	0.565481
1200	100	8	2	0.565481
120	2	8	5	0.615286
300	2	8	5	0.616275
500	2	8	5	0.612224
800	2	8	5	0.612204
1200	2	8	5	0.613214
120	5	8	5	0.615286
300	5	8	5	0.616275
500	5	8	5	0.612224
800	5	8	5	0.612204
1200	5	8	5	0.613214
120	10	8	5	0.615286
300	10	8	5	0.616275
500	10	8	5	0.612224
800	10	8	5	0.612204
1200	10	8	5	0.613214
120	15	8	5	0.612224
300	15	8	5	0.621356
500	15	8	5	0.617285
800	15	8	5	0.613224
1200	15	8	5	0.616265
120	100	8	5	0.56041
300	100	8	5	0.565471
500	100	8	5	0.564482
800	100	8	5	0.566502
1200	100	8	5	0.566502
120	2	8	10	0.60101
300	2	8	10	0.603041
500	2	8	10	0.604051
800	2	8	10	0.604051
1200	2	8	10	0.605061
120	5	8	10	0.60101
300	5	8	10	0.603041
500	5	8	10	0.604051
800	5	8	10	0.604051
1200	5	8	10	0.605061
120	10	8	10	0.60101
300	10	8	10	0.603041
500	10	8	10	0.604051
800	10	8	10	0.604051
1200	10	8	10	0.605061
120	15	8	10	0.60101
300	15	8	10	0.603041
500	15	8	10	0.604051
800	15	8	10	0.604051
1200	15	8	10	0.605061
120	100	8	10	0.561441
300	100	8	10	0.566502
500	100	8	10	0.566502
800	100	8	10	0.569532
1200	100	8	10	0.568522
120	2	15	1	0.603082
300	2	15	1	0.599
500	2	15	1	0.595939
800	2	15	1	0.601031
1200	2	15	1	0.59697
120	5	15	1	0.608132
300	5	15	1	0.605102
500	5	15	1	0.602041
800	5	15	1	0.603051
1200	5	15	1	0.605092
120	10	15	1	0.612204
300	10	15	1	0.614214
500	10	15	1	0.606102
800	10	15	1	0.608132
1200	10	15	1	0.605081
120	15	15	1	0.608132
300	15	15	1	0.610204
500	15	15	1	0.614224
800	15	15	1	0.610153
1200	15	15	1	0.611194
120	100	15	1	0.56142
300	100	15	1	0.563461
500	100	15	1	0.563471
800	100	15	1	0.562441
1200	100	15	1	0.566491
120	2	15	2	0.609142
300	2	15	2	0.612193
500	2	15	2	0.611173
800	2	15	2	0.611194
1200	2	15	2	0.609153
120	5	15	2	0.614224
300	5	15	2	0.614244
500	5	15	2	0.610163
800	5	15	2	0.608132
1200	5	15	2	0.607102
120	10	15	2	0.609153
300	10	15	2	0.607122
500	10	15	2	0.608132
800	10	15	2	0.611173
1200	10	15	2	0.608143
120	15	15	2	0.619347
300	15	15	2	0.616306
500	15	15	2	0.613245
800	15	15	2	0.609173
1200	15	15	2	0.609163
120	100	15	2	0.560421
300	100	15	2	0.564482
500	100	15	2	0.563482
800	100	15	2	0.562441
1200	100	15	2	0.565481
120	2	15	5	0.615286
300	2	15	5	0.617306
500	2	15	5	0.612204
800	2	15	5	0.610183
1200	2	15	5	0.614224
120	5	15	5	0.615286
300	5	15	5	0.617306
500	5	15	5	0.612204
800	5	15	5	0.610183
1200	5	15	5	0.614224
120	10	15	5	0.615286
300	10	15	5	0.617306
500	10	15	5	0.612204
800	10	15	5	0.610183
1200	10	15	5	0.614224
120	15	15	5	0.610183
300	15	15	5	0.619316
500	15	15	5	0.613234
800	15	15	5	0.607133
1200	15	15	5	0.610183
120	100	15	5	0.55939
300	100	15	5	0.561431
500	100	15	5	0.561441
800	100	15	5	0.565471
1200	100	15	5	0.567512
120	2	15	10	0.60303
300	2	15	10	0.606092
500	2	15	10	0.603041
800	2	15	10	0.604051
1200	2	15	10	0.604051
120	5	15	10	0.60303
300	5	15	10	0.606092
500	5	15	10	0.603041
800	5	15	10	0.604051
1200	5	15	10	0.604051
120	10	15	10	0.60303
300	10	15	10	0.606092
500	10	15	10	0.603041
800	10	15	10	0.604051
1200	10	15	10	0.604051
120	15	15	10	0.60303
300	15	15	10	0.606092
500	15	15	10	0.603041
800	15	15	10	0.604051
1200	15	15	10	0.604051
120	100	15	10	0.563471
300	100	15	10	0.567512
500	100	15	10	0.566502
800	100	15	10	0.569522
1200	100	15	10	0.570542
120	2	25	1	0.602041
300	2	25	1	0.603041
500	2	25	1	0.60001
800	2	25	1	0.600021
1200	2	25	1	0.599011
120	5	25	1	0.612235
300	5	25	1	0.606122
500	5	25	1	0.603061
800	5	25	1	0.606112
1200	5	25	1	0.606122
120	10	25	1	0.607102
300	10	25	1	0.611163
500	10	25	1	0.608101
800	10	25	1	0.606102
1200	10	25	1	0.604061
120	15	25	1	0.606092
300	15	25	1	0.609163
500	15	25	1	0.611163
800	15	25	1	0.611173
1200	15	25	1	0.612204
120	100	25	1	0.56142
300	100	25	1	0.563461
500	100	25	1	0.563471
800	100	25	1	0.562441
1200	100	25	1	0.566491
120	2	25	2	0.607102
300	2	25	2	0.610142
500	2	25	2	0.610153
800	2	25	2	0.610173
1200	2	25	2	0.608132
120	5	25	2	0.616254
300	5	25	2	0.615275
500	5	25	2	0.609163
800	5	25	2	0.603051
1200	5	25	2	0.605081
120	10	25	2	0.605061
300	10	25	2	0.604082
500	10	25	2	0.606092
800	10	25	2	0.608132
1200	10	25	2	0.609153
120	15	25	2	0.615275
300	15	25	2	0.614275
500	15	25	2	0.613255
800	15	25	2	0.609173
1200	15	25	2	0.608163
120	100	25	2	0.560421
300	100	25	2	0.564482
500	100	25	2	0.563482
800	100	25	2	0.562441
1200	100	25	2	0.565481
120	2	25	5	0.614265
300	2	25	5	0.614265
500	2	25	5	0.613234
800	2	25	5	0.611204
1200	2	25	5	0.615234
120	5	25	5	0.614265
300	5	25	5	0.614265
500	5	25	5	0.613234
800	5	25	5	0.611204
1200	5	25	5	0.615234
120	10	25	5	0.614265
300	10	25	5	0.614265
500	10	25	5	0.613234
800	10	25	5	0.611204
1200	10	25	5	0.615234
120	15	25	5	0.612214
300	15	25	5	0.617295
500	15	25	5	0.613234
800	15	25	5	0.608153
1200	15	25	5	0.609173
120	100	25	5	0.55939
300	100	25	5	0.561431
500	100	25	5	0.561441
800	100	25	5	0.565471
1200	100	25	5	0.567512
120	2	25	10	0.605061
300	2	25	10	0.606092
500	2	25	10	0.603041
800	2	25	10	0.604051
1200	2	25	10	0.604051
120	5	25	10	0.605061
300	5	25	10	0.606092
500	5	25	10	0.603041
800	5	25	10	0.604051
1200	5	25	10	0.604051
120	10	25	10	0.605061
300	10	25	10	0.606092
500	10	25	10	0.603041
800	10	25	10	0.604051
1200	10	25	10	0.604051
120	15	25	10	0.605061
300	15	25	10	0.606092
500	15	25	10	0.603041
800	15	25	10	0.604051
1200	15	25	10	0.604051
120	100	25	10	0.563471
300	100	25	10	0.567512
500	100	25	10	0.566502
800	100	25	10	0.569522
1200	100	25	10	0.570542
120	2	30	1	0.602041
300	2	30	1	0.602031
500	2	30	1	0.60102
800	2	30	1	0.601031
1200	2	30	1	0.598
120	5	30	1	0.610214
300	5	30	1	0.606122
500	5	30	1	0.60102
800	5	30	1	0.606112
1200	5	30	1	0.606122
120	10	30	1	0.607102
300	10	30	1	0.611163
500	10	30	1	0.607091
800	10	30	1	0.608132
1200	10	30	1	0.605081
120	15	30	1	0.606092
300	15	30	1	0.609163
500	15	30	1	0.611163
800	15	30	1	0.611173
1200	15	30	1	0.612204
120	100	30	1	0.56142
300	100	30	1	0.563461
500	100	30	1	0.563471
800	100	30	1	0.562441
1200	100	30	1	0.566491
120	2	30	2	0.607102
300	2	30	2	0.610142
500	2	30	2	0.610153
800	2	30	2	0.610173
1200	2	30	2	0.608132
120	5	30	2	0.616254
300	5	30	2	0.615275
500	5	30	2	0.609163
800	5	30	2	0.603051
1200	5	30	2	0.605081
120	10	30	2	0.605061
300	10	30	2	0.604082
500	10	30	2	0.606092
800	10	30	2	0.608132
1200	10	30	2	0.609153
120	15	30	2	0.615275
300	15	30	2	0.614275
500	15	30	2	0.613255
800	15	30	2	0.609173
1200	15	30	2	0.608163
120	100	30	2	0.560421
300	100	30	2	0.564482
500	100	30	2	0.563482
800	100	30	2	0.562441
1200	100	30	2	0.565481
120	2	30	5	0.614265
300	2	30	5	0.614265
500	2	30	5	0.613234
800	2	30	5	0.611204
1200	2	30	5	0.615234
120	5	30	5	0.614265
300	5	30	5	0.614265
500	5	30	5	0.613234
800	5	30	5	0.611204
1200	5	30	5	0.615234
120	10	30	5	0.614265
300	10	30	5	0.614265
500	10	30	5	0.613234
800	10	30	5	0.611204
1200	10	30	5	0.615234
120	15	30	5	0.612214
300	15	30	5	0.617295
500	15	30	5	0.613234
800	15	30	5	0.608153
1200	15	30	5	0.609173
120	100	30	5	0.55939
300	100	30	5	0.561431
500	100	30	5	0.561441
800	100	30	5	0.565471
1200	100	30	5	0.567512
120	2	30	10	0.605061
300	2	30	10	0.606092
500	2	30	10	0.603041
800	2	30	10	0.604051
1200	2	30	10	0.604051
120	5	30	10	0.605061
300	5	30	10	0.606092
500	5	30	10	0.603041
800	5	30	10	0.604051
1200	5	30	10	0.604051
120	10	30	10	0.605061
300	10	30	10	0.606092
500	10	30	10	0.603041
800	10	30	10	0.604051
1200	10	30	10	0.604051
120	15	30	10	0.605061
300	15	30	10	0.606092
500	15	30	10	0.603041
800	15	30	10	0.604051
1200	15	30	10	0.604051
120	100	30	10	0.563471
300	100	30	10	0.567512
500	100	30	10	0.566502
800	100	30	10	0.569522
1200	100	30	10	0.570542
120	2		1	0.602041
300	2		1	0.602031
500	2		1	0.60102
800	2		1	0.601031
1200	2		1	0.598
120	5		1	0.610214
300	5		1	0.606122
500	5		1	0.60102
800	5		1	0.606112
1200	5		1	0.606122
120	10		1	0.607102
300	10		1	0.611163
500	10		1	0.607091
800	10		1	0.608132
1200	10		1	0.605081
120	15		1	0.606092
300	15		1	0.609163
500	15		1	0.611163
800	15		1	0.611173
1200	15		1	0.612204
120	100		1	0.56142
300	100		1	0.563461
500	100		1	0.563471
800	100		1	0.562441
1200	100		1	0.566491
120	2		2	0.607102
300	2		2	0.610142
500	2		2	0.610153
800	2		2	0.610173
1200	2		2	0.608132
120	5		2	0.616254
300	5		2	0.615275
500	5		2	0.609163
800	5		2	0.603051
1200	5		2	0.605081
120	10		2	0.605061
300	10		2	0.604082
500	10		2	0.606092
800	10		2	0.608132
1200	10		2	0.609153
120	15		2	0.615275
300	15		2	0.614275
500	15		2	0.613255
800	15		2	0.609173
1200	15		2	0.608163
120	100		2	0.560421
300	100		2	0.564482
500	100		2	0.563482
800	100		2	0.562441
1200	100		2	0.565481
120	2		5	0.614265
300	2		5	0.614265
500	2		5	0.613234
800	2		5	0.611204
1200	2		5	0.615234
120	5		5	0.614265
300	5		5	0.614265
500	5		5	0.613234
800	5		5	0.611204
1200	5		5	0.615234
120	10		5	0.614265
300	10		5	0.614265
500	10		5	0.613234
800	10		5	0.611204
1200	10		5	0.615234
120	15		5	0.612214
300	15		5	0.617295
500	15		5	0.613234
800	15		5	0.608153
1200	15		5	0.609173
120	100		5	0.55939
300	100		5	0.561431
500	100		5	0.561441
800	100		5	0.565471
1200	100		5	0.567512
120	2		10	0.605061
300	2		10	0.606092
500	2		10	0.603041
800	2		10	0.604051
1200	2		10	0.604051
120	5		10	0.605061
300	5		10	0.606092
500	5		10	0.603041
800	5		10	0.604051
1200	5		10	0.604051
120	10		10	0.605061
300	10		10	0.606092
500	10		10	0.603041
800	10		10	0.604051
1200	10		10	0.604051
120	15		10	0.605061
300	15		10	0.606092
500	15		10	0.603041
800	15		10	0.604051
1200	15		10	0.604051
120	100		10	0.563471
300	100		10	0.567512
500	100		10	0.566502
800	100		10	0.569522
1200	100		10	0.570542
