# Supplementary material for: Global health risk assessment of antibiotic resistance in agricultural soils
Source: Research Square preprint supplement (doi:10.21203/rs.3.rs-7635655/v1), 2025-10-13
Supplement: Supplementary file 9 [file cbe1ffb49e47a4a9e0f86bda.xlsx]

## Sheet: Supplementary Table 4
Supplementary Table 4 ARG resistance mechanisms and drug class					Subtypes	mechanism	drug class	richness
mechanism	count	drug class	count		aminoglycoside__AAC(2')-IIa	antibiotic inactivation	aminoglycoside antibiotic	77
antibiotic inactivation	53876	aminocoumarin antibiotic	8093		aminoglycoside__AAC(2')-IIb	antibiotic inactivation	aminoglycoside antibiotic	15
antibiotic efflux	62285	aminoglycoside antibiotic	23380		aminoglycoside__AAC(2')-Ib	antibiotic inactivation	aminoglycoside antibiotic	793
antibiotic target alteration	16602	antibacterial free fatty acids	385		aminoglycoside__AAC(2')-Ic	antibiotic inactivation	aminoglycoside antibiotic	431
antibiotic target replacement	3581	bicyclomycin-like antibiotic	24		aminoglycoside__AAC(2')-Id	antibiotic inactivation	aminoglycoside antibiotic	26
antibiotic target protection	12837	carbapenem	15065		aminoglycoside__AAC(2')-Ie	antibiotic inactivation	aminoglycoside antibiotic	133
others	5317	cephalosporin	20364		aminoglycoside__AAC(3)-IIIa	antibiotic inactivation	aminoglycoside antibiotic	36
		cephamycin	7720		aminoglycoside__AAC(3)-IIIb	antibiotic inactivation	aminoglycoside antibiotic	487
		diaminopyrimidine antibiotic	11160		aminoglycoside__AAC(3)-IIIc	antibiotic inactivation	aminoglycoside antibiotic	532
		disinfecting agents and antiseptics	8448		aminoglycoside__AAC(3)-IIa	antibiotic inactivation	aminoglycoside antibiotic	24
		elfamycin antibiotic	224		aminoglycoside__AAC(3)-IIb	antibiotic inactivation	aminoglycoside antibiotic	72
		fluoroquinolone antibiotic	26729		aminoglycoside__AAC(3)-IIc	antibiotic inactivation	aminoglycoside antibiotic	77
		fusidane antibiotic	31		aminoglycoside__AAC(3)-IId	antibiotic inactivation	aminoglycoside antibiotic	49
		glycopeptide antibiotic	10151		aminoglycoside__AAC(3)-IIe	antibiotic inactivation	aminoglycoside antibiotic	97
		glycylcycline	2564		aminoglycoside__AAC(3)-IIg	antibiotic inactivation	aminoglycoside antibiotic	71
		isoniazid-like antibiotic	930		aminoglycoside__AAC(3)-IV	antibiotic inactivation	aminoglycoside antibiotic	508
		lincosamide antibiotic	7048		aminoglycoside__AAC(3)-IVb	antibiotic inactivation	aminoglycoside antibiotic	700
		macrolide antibiotic	28626		aminoglycoside__AAC(3)-IXa	antibiotic inactivation	aminoglycoside antibiotic	87
		monobactam	7814		aminoglycoside__AAC(3)-Ia	antibiotic inactivation	aminoglycoside antibiotic	389
		mupirocin-like antibiotic	2130		aminoglycoside__AAC(3)-Ib	antibiotic inactivation	aminoglycoside antibiotic	428
		nitrofuran antibiotic	1278		aminoglycoside__AAC(3)-Ib/AAC(6')-Ib''	antibiotic inactivation	aminoglycoside antibiotic	28
		nitroimidazole antibiotic	972		aminoglycoside__AAC(3)-Ic	antibiotic inactivation	aminoglycoside antibiotic	346
		nucleoside antibiotic	1399		aminoglycoside__AAC(3)-Id	antibiotic inactivation	aminoglycoside antibiotic	564
		orthosomycin antibiotic	32		aminoglycoside__AAC(3)-VIIIa	antibiotic inactivation	aminoglycoside antibiotic	80
		other	4114		aminoglycoside__AAC(3)-VIIa	antibiotic inactivation	aminoglycoside antibiotic	208
		oxazolidinone antibiotic	641		aminoglycoside__AAC(3)-VIa	antibiotic inactivation	aminoglycoside antibiotic	37
		penam	24094		aminoglycoside__AAC(3)-Xa	antibiotic inactivation	aminoglycoside antibiotic	89
		penem	16465		aminoglycoside__AAC(6')-29a	antibiotic inactivation	aminoglycoside antibiotic	1
		peptide antibiotic	21655		aminoglycoside__AAC(6')-29b	antibiotic inactivation	aminoglycoside antibiotic	1
		phenicol antibiotic	19719		aminoglycoside__AAC(6')-30/AAC(6')-Ib' fusion protein	antibiotic inactivation	aminoglycoside antibiotic	20
		phosphonic acid antibiotic	1609		aminoglycoside__AAC(6')-31	antibiotic inactivation	aminoglycoside antibiotic	291
		pleuromutilin antibiotic	2042		aminoglycoside__AAC(6')-32	antibiotic inactivation	aminoglycoside antibiotic	207
		polyamine antibiotic	3		aminoglycoside__AAC(6')-33	antibiotic inactivation	aminoglycoside antibiotic	6
		rifamycin antibiotic	10485		aminoglycoside__AAC(6')-34	antibiotic inactivation	aminoglycoside antibiotic	17
		streptogramin antibiotic	6358		aminoglycoside__AAC(6')-I30	antibiotic inactivation	aminoglycoside antibiotic	1
		sulfonamide antibiotic	3667		aminoglycoside__AAC(6')-IIa	antibiotic inactivation	aminoglycoside antibiotic	344
		tetracenomycin antibiotic	844		aminoglycoside__AAC(6')-IIb	antibiotic inactivation	aminoglycoside antibiotic	111
		tetracycline antibiotic	31913		aminoglycoside__AAC(6')-IIc	antibiotic inactivation	aminoglycoside antibiotic	71
					aminoglycoside__AAC(6')-Iaa	antibiotic inactivation	aminoglycoside antibiotic	1
					aminoglycoside__AAC(6')-Ia	antibiotic inactivation	aminoglycoside antibiotic	5
					aminoglycoside__AAC(6')-Iad	antibiotic inactivation	aminoglycoside antibiotic	5
					aminoglycoside__AAC(6')-Iaf	antibiotic inactivation	aminoglycoside antibiotic	2
					aminoglycoside__AAC(6')-Iag	antibiotic inactivation	aminoglycoside antibiotic	11
					aminoglycoside__AAC(6')-Iai	antibiotic inactivation	aminoglycoside antibiotic	2
					aminoglycoside__AAC(6')-Iak	antibiotic inactivation	aminoglycoside antibiotic	40
					aminoglycoside__AAC(6')-Ian	antibiotic inactivation	aminoglycoside antibiotic	10
					aminoglycoside__AAC(6')-Iaj	antibiotic inactivation	aminoglycoside antibiotic	1
					aminoglycoside__AAC(6')-Ib	antibiotic inactivation	aminoglycoside antibiotic	59
					aminoglycoside__AAC(6')-Ib'	antibiotic inactivation	aminoglycoside antibiotic	92
					aminoglycoside__AAC(6')-Ib-Hangzhou	antibiotic inactivation	aminoglycoside antibiotic	44
					aminoglycoside__AAC(6')-Ib-SK	antibiotic inactivation	aminoglycoside antibiotic	129
					aminoglycoside__AAC(6')-Ib-Suzhou	antibiotic inactivation	aminoglycoside antibiotic	28
					aminoglycoside__AAC(6')-Ib-cr	antibiotic inactivation	aminoglycoside antibiotic	73
					aminoglycoside__AAC(6')-Ib10	antibiotic inactivation	aminoglycoside antibiotic	51
					aminoglycoside__AAC(6')-Ib11	antibiotic inactivation	aminoglycoside antibiotic	44
					aminoglycoside__AAC(6')-Ib3	antibiotic inactivation	aminoglycoside antibiotic	19
					aminoglycoside__AAC(6')-Ib4	antibiotic inactivation	aminoglycoside antibiotic	24
					aminoglycoside__AAC(6')-Ib7	antibiotic inactivation	aminoglycoside antibiotic	118
					aminoglycoside__AAC(6')-Ib8	antibiotic inactivation	aminoglycoside antibiotic	21
					aminoglycoside__AAC(6')-Ib9	antibiotic inactivation	aminoglycoside antibiotic	67
					aminoglycoside__AAC(6')-Ic	antibiotic inactivation	aminoglycoside antibiotic	9
					aminoglycoside__AAC(6')-Ie-APH(2'')-Ia	antibiotic inactivation	aminoglycoside antibiotic	81
					aminoglycoside__AAC(6')-Ig	antibiotic inactivation	aminoglycoside antibiotic	7
					aminoglycoside__AAC(6')-Ii	antibiotic inactivation	aminoglycoside antibiotic	6
					aminoglycoside__AAC(6')-Iid	antibiotic inactivation	aminoglycoside antibiotic	1
					aminoglycoside__AAC(6')-Iih	antibiotic inactivation	aminoglycoside antibiotic	11
					aminoglycoside__AAC(6')-Ij	antibiotic inactivation	aminoglycoside antibiotic	1
					aminoglycoside__AAC(6')-Ik	antibiotic inactivation	aminoglycoside antibiotic	11
					aminoglycoside__AAC(6')-Il	antibiotic inactivation	aminoglycoside antibiotic	24
					aminoglycoside__AAC(6')-Ip	antibiotic inactivation	aminoglycoside antibiotic	1
					aminoglycoside__AAC(6')-Ir	antibiotic inactivation	aminoglycoside antibiotic	2
					aminoglycoside__AAC(6')-Is	antibiotic inactivation	aminoglycoside antibiotic	5
					aminoglycoside__AAC(6')-Im	antibiotic inactivation	aminoglycoside antibiotic	21
					aminoglycoside__AAC(6')-Isa	antibiotic inactivation	aminoglycoside antibiotic	432
					aminoglycoside__AAC(6')-Iu	antibiotic inactivation	aminoglycoside antibiotic	2
					aminoglycoside__AAC(6')-Iv	antibiotic inactivation	aminoglycoside antibiotic	1
					aminoglycoside__AAC(6')-Iy	antibiotic inactivation	aminoglycoside antibiotic	3
					aminoglycoside__AAC(6')-Ix	antibiotic inactivation	aminoglycoside antibiotic	2
					aminoglycoside__AAC(6')-Iw	antibiotic inactivation	aminoglycoside antibiotic	2
					aminoglycoside__AAC(6')-Iz	antibiotic inactivation	aminoglycoside antibiotic	29
					aminoglycoside__ANT(2'')-Ia	antibiotic inactivation	aminoglycoside antibiotic	56
					aminoglycoside__ANT(3'')-IIb	antibiotic inactivation	aminoglycoside antibiotic	7
					aminoglycoside__ANT(3'')-IIa	antibiotic inactivation	aminoglycoside antibiotic	39
					aminoglycoside__ANT(3'')-IIc	antibiotic inactivation	aminoglycoside antibiotic	9
					aminoglycoside__ANT(3'')-Ii-AAC(6')-IId fusion protein	antibiotic inactivation	aminoglycoside antibiotic	56
					aminoglycoside__ANT(4')-IIa	antibiotic inactivation	aminoglycoside antibiotic	3
					aminoglycoside__ANT(4')-IIb	antibiotic inactivation	aminoglycoside antibiotic	6
					aminoglycoside__ANT(4')-Ia	antibiotic inactivation	aminoglycoside antibiotic	36
					aminoglycoside__ANT(4')-Ib	antibiotic inactivation	aminoglycoside antibiotic	67
					aminoglycoside__ANT(6)-Ia	antibiotic inactivation	aminoglycoside antibiotic	190
					aminoglycoside__ANT(6)-Ib	antibiotic inactivation	aminoglycoside antibiotic	61
					aminoglycoside__ANT(9)-Ia	antibiotic inactivation	aminoglycoside antibiotic	79
					aminoglycoside__APH(2'')-IIIa	antibiotic inactivation	aminoglycoside antibiotic	33
					aminoglycoside__APH(2'')-IIa	antibiotic inactivation	aminoglycoside antibiotic	23
					aminoglycoside__APH(2'')-IVa	antibiotic inactivation	aminoglycoside antibiotic	7
					aminoglycoside__APH(2'')-Ie	antibiotic inactivation	aminoglycoside antibiotic	14
					aminoglycoside__APH(2'')-If	antibiotic inactivation	aminoglycoside antibiotic	32
					aminoglycoside__APH(2'')-Ig	antibiotic inactivation	aminoglycoside antibiotic	2
					aminoglycoside__APH(3'')-Ia	antibiotic inactivation	aminoglycoside antibiotic	117
					aminoglycoside__APH(3'')-Ib	antibiotic inactivation	aminoglycoside antibiotic	236
					aminoglycoside__APH(3'')-Ic	antibiotic inactivation	aminoglycoside antibiotic	69
					aminoglycoside__APH(3')-IIIa	antibiotic inactivation	aminoglycoside antibiotic	85
					aminoglycoside__APH(3')-IIa	antibiotic inactivation	aminoglycoside antibiotic	120
					aminoglycoside__APH(3')-IIb	antibiotic inactivation	aminoglycoside antibiotic	51
					aminoglycoside__APH(3')-IIc	antibiotic inactivation	aminoglycoside antibiotic	73
					aminoglycoside__APH(3')-IVa	antibiotic inactivation	aminoglycoside antibiotic	1
					aminoglycoside__APH(3')-Ia	antibiotic inactivation	aminoglycoside antibiotic	184
					aminoglycoside__APH(3')-Ib	antibiotic inactivation	aminoglycoside antibiotic	81
					aminoglycoside__APH(3')-VI	antibiotic inactivation	aminoglycoside antibiotic	24
					aminoglycoside__APH(3')-VIa	antibiotic inactivation	aminoglycoside antibiotic	23
					aminoglycoside__APH(3')-VIIIa	antibiotic inactivation	aminoglycoside antibiotic	3
					aminoglycoside__APH(3')-Va	antibiotic inactivation	aminoglycoside antibiotic	5
					aminoglycoside__APH(3')-Vb	antibiotic inactivation	aminoglycoside antibiotic	3
					aminoglycoside__APH(3')-Vc	antibiotic inactivation	aminoglycoside antibiotic	14
					aminoglycoside__APH(4)-Ia	antibiotic inactivation	aminoglycoside antibiotic	39
					aminoglycoside__APH(4)-Ib	antibiotic inactivation	aminoglycoside antibiotic	1
					aminoglycoside__APH(6)-Ia	antibiotic inactivation	aminoglycoside antibiotic	307
					aminoglycoside__APH(6)-Ib	antibiotic inactivation	aminoglycoside antibiotic	381
					aminoglycoside__APH(6)-Ic	antibiotic inactivation	aminoglycoside antibiotic	529
					aminoglycoside__APH(6)-Id	antibiotic inactivation	aminoglycoside antibiotic	183
					aminoglycoside__APH(7'')-Ia	antibiotic inactivation	aminoglycoside antibiotic	14
					aminoglycoside__APH(9)-Ia	antibiotic inactivation	aminoglycoside antibiotic	108
					aminoglycoside__APH(9)-Ib	antibiotic inactivation	aminoglycoside antibiotic	14
					aminoglycoside__Other streptomycin resistance protein	antibiotic inactivation	aminoglycoside antibiotic	49
					aminoglycoside__aacA43	antibiotic inactivation	aminoglycoside antibiotic	3
					aminoglycoside__aad(6)	antibiotic inactivation	aminoglycoside antibiotic	125
					aminoglycoside__aadA	antibiotic inactivation	aminoglycoside antibiotic	249
					aminoglycoside__aadA10	antibiotic inactivation	aminoglycoside antibiotic	91
					aminoglycoside__aadA11	antibiotic inactivation	aminoglycoside antibiotic	29
					aminoglycoside__aadA12	antibiotic inactivation	aminoglycoside antibiotic	118
					aminoglycoside__aadA13	antibiotic inactivation	aminoglycoside antibiotic	69
					aminoglycoside__aadA14	antibiotic inactivation	aminoglycoside antibiotic	31
					aminoglycoside__aadA15	antibiotic inactivation	aminoglycoside antibiotic	23
					aminoglycoside__aadA16	antibiotic inactivation	aminoglycoside antibiotic	92
					aminoglycoside__aadA17	antibiotic inactivation	aminoglycoside antibiotic	86
					aminoglycoside__aadA2	antibiotic inactivation	aminoglycoside antibiotic	109
					aminoglycoside__aadA21	antibiotic inactivation	aminoglycoside antibiotic	72
					aminoglycoside__aadA22	antibiotic inactivation	aminoglycoside antibiotic	98
					aminoglycoside__aadA23	antibiotic inactivation	aminoglycoside antibiotic	139
					aminoglycoside__aadA4	antibiotic inactivation	aminoglycoside antibiotic	36
					aminoglycoside__aadA24	antibiotic inactivation	aminoglycoside antibiotic	75
					aminoglycoside__aadA25	antibiotic inactivation	aminoglycoside antibiotic	54
					aminoglycoside__aadA27	antibiotic inactivation	aminoglycoside antibiotic	27
					aminoglycoside__aadA3	antibiotic inactivation	aminoglycoside antibiotic	128
					aminoglycoside__aadA5	antibiotic inactivation	aminoglycoside antibiotic	108
					aminoglycoside__aadA6	antibiotic inactivation	aminoglycoside antibiotic	24
					aminoglycoside__aadA6/aadA10	antibiotic inactivation	aminoglycoside antibiotic	86
					aminoglycoside__aadA7	antibiotic inactivation	aminoglycoside antibiotic	63
					aminoglycoside__aadA8	antibiotic inactivation	aminoglycoside antibiotic	109
					aminoglycoside__aadA9	antibiotic inactivation	aminoglycoside antibiotic	77
					aminoglycoside__aadA8b	antibiotic inactivation	aminoglycoside antibiotic	99
					aminoglycoside__aadK	antibiotic inactivation	aminoglycoside antibiotic	178
					aminoglycoside__aadS	antibiotic inactivation	aminoglycoside antibiotic	107
					aminoglycoside__amrA	antibiotic efflux	aminoglycoside antibiotic, macrolide antibiotic	90
					aminoglycoside__amrB	antibiotic efflux	aminoglycoside antibiotic, macrolide antibiotic	581
					aminoglycoside__cpaA	antibiotic inactivation	aminoglycoside antibiotic	9
					aminoglycoside__aphA15	antibiotic inactivation	aminoglycoside antibiotic	21
					aminoglycoside__apmA	antibiotic inactivation	aminoglycoside antibiotic	28
					aminoglycoside__kamB	antibiotic target alteration	aminoglycoside antibiotic	5
					aminoglycoside__rmtA	antibiotic target alteration	aminoglycoside antibiotic	1
					aminoglycoside__sgm	antibiotic target alteration	aminoglycoside antibiotic	62
					aminoglycoside__armA	antibiotic target alteration	aminoglycoside antibiotic	5
					aminoglycoside__npmA	antibiotic target alteration	aminoglycoside antibiotic	5
					aminoglycoside__rmtB	antibiotic target alteration	aminoglycoside antibiotic	5
					aminoglycoside__spd	antibiotic inactivation	aminoglycoside antibiotic	7
					aminoglycoside__rmtF	antibiotic target alteration	aminoglycoside antibiotic	1
					antibacterial_fatty_acid__farA	antibiotic efflux	antibacterial free fatty acids	375
					antibacterial_fatty_acid__farB	antibiotic efflux	antibacterial free fatty acids	10
					bacitracin__BahA	antibiotic inactivation	peptide antibiotic	343
					bacitracin__bacA	antibiotic target alteration	peptide antibiotic	985
					bacitracin__bcrA	antibiotic efflux	peptide antibiotic	863
					bacitracin__bcrB	antibiotic efflux	peptide antibiotic	10
					beta_lactam__ACC-1	antibiotic inactivation	cephalosporin, monobactam, penam	34
					beta_lactam__ACT-21	antibiotic inactivation	carbapenem, cephalosporin, cephamycin, penam	1
					beta_lactam__ACC-2	antibiotic inactivation	cephalosporin, monobactam, penam	1
					beta_lactam__ACC-3	antibiotic inactivation	cephalosporin, monobactam, penam	3
					beta_lactam__ACT-24	antibiotic inactivation	carbapenem, cephalosporin, cephamycin, penam	2
					beta_lactam__ACT-10	antibiotic inactivation	carbapenem, cephalosporin, cephamycin, penam	10
					beta_lactam__ACT-12	antibiotic inactivation	carbapenem, cephalosporin, cephamycin, penam	8
					beta_lactam__ACT-13	antibiotic inactivation	carbapenem, cephalosporin, cephamycin, penam	9
					beta_lactam__ACT-2	antibiotic inactivation	carbapenem, cephalosporin, cephamycin, penam	4
					beta_lactam__ACT-15	antibiotic inactivation	carbapenem, cephalosporin, cephamycin, penam	4
					beta_lactam__ACT-17	antibiotic inactivation	carbapenem, cephalosporin, cephamycin, penam	17
					beta_lactam__ACT-19	antibiotic inactivation	carbapenem, cephalosporin, cephamycin, penam	1
					beta_lactam__ACT-20	antibiotic inactivation	carbapenem, cephalosporin, cephamycin, penam	4
					beta_lactam__ACT-16	antibiotic inactivation	carbapenem, cephalosporin, cephamycin, penam	6
					beta_lactam__ACT-22	antibiotic inactivation	carbapenem, cephalosporin, cephamycin, penam	11
					beta_lactam__ACT-27	antibiotic inactivation	carbapenem, cephalosporin, cephamycin, penam	4
					beta_lactam__ACT-18	antibiotic inactivation	carbapenem, cephalosporin, cephamycin, penam	2
					beta_lactam__ACT-23	antibiotic inactivation	carbapenem, cephalosporin, cephamycin, penam	2
					beta_lactam__ACT-28	antibiotic inactivation	carbapenem, cephalosporin, cephamycin, penam	10
					beta_lactam__ACI-1	antibiotic inactivation	cephalosporin, penam, penem	6
					beta_lactam__ACT-25	antibiotic inactivation	carbapenem, cephalosporin, cephamycin, penam	3
					beta_lactam__ACT-29	antibiotic inactivation	carbapenem, cephalosporin, cephamycin, penam	39
					beta_lactam__ACT-30	antibiotic inactivation	carbapenem, cephalosporin, cephamycin, penam	20
					beta_lactam__ACT-31	antibiotic inactivation	carbapenem, cephalosporin, cephamycin, penam	2
					beta_lactam__ACT-38	antibiotic inactivation	carbapenem, cephalosporin, cephamycin, penam	2
					beta_lactam__ACT-4	antibiotic inactivation	carbapenem, cephalosporin, cephamycin, penam	8
					beta_lactam__ACT-5	antibiotic inactivation	carbapenem, cephalosporin, cephamycin, penam	1
					beta_lactam__ACT-6	antibiotic inactivation	carbapenem, cephalosporin, cephamycin, penam	16
					beta_lactam__ACT-32	antibiotic inactivation	carbapenem, cephalosporin, cephamycin, penam	1
					beta_lactam__ACT-8	antibiotic inactivation	carbapenem, cephalosporin, cephamycin, penam	6
					beta_lactam__ACT-9	antibiotic inactivation	carbapenem, cephalosporin, cephamycin, penam	5
					beta_lactam__ACT-7	antibiotic inactivation	carbapenem, cephalosporin, cephamycin, penam	1
					beta_lactam__ADC-12	antibiotic inactivation	cephalosporin	1
					beta_lactam__ADC-13	antibiotic inactivation	cephalosporin	6
					beta_lactam__ADC-41	antibiotic inactivation	cephalosporin	1
					beta_lactam__ADC-42	antibiotic inactivation	cephalosporin	3
					beta_lactam__ADC-44	antibiotic inactivation	cephalosporin	8
					beta_lactam__ADC-58	antibiotic inactivation	cephalosporin	1
					beta_lactam__ADC-6	antibiotic inactivation	cephalosporin	3
					beta_lactam__ADC-68	antibiotic inactivation	cephalosporin	6
					beta_lactam__ADC-73	antibiotic inactivation	cephalosporin	1
					beta_lactam__ADC-79	antibiotic inactivation	cephalosporin	6
					beta_lactam__ADC-31	antibiotic inactivation	cephalosporin	1
					beta_lactam__ADC-8	antibiotic inactivation	cephalosporin	11
					beta_lactam__ADC-16	antibiotic inactivation	cephalosporin	2
					beta_lactam__ADC-14	antibiotic inactivation	cephalosporin	1
					beta_lactam__ADC-15	antibiotic inactivation	cephalosporin	8
					beta_lactam__ADC-17	antibiotic inactivation	cephalosporin	2
					beta_lactam__ADC-18	antibiotic inactivation	cephalosporin	4
					beta_lactam__ADC-19	antibiotic inactivation	cephalosporin	9
					beta_lactam__ADC-21	antibiotic inactivation	cephalosporin	2
					beta_lactam__ADC-20	antibiotic inactivation	cephalosporin	1
					beta_lactam__ADC-22	antibiotic inactivation	cephalosporin	9
					beta_lactam__ADC-3	antibiotic inactivation	cephalosporin	3
					beta_lactam__ADC-30	antibiotic inactivation	cephalosporin	3
					beta_lactam__ADC-23	antibiotic inactivation	cephalosporin	3
					beta_lactam__ADC-25	antibiotic inactivation	cephalosporin	4
					beta_lactam__ADC-76	antibiotic inactivation	cephalosporin	1
					beta_lactam__ADC-75	antibiotic inactivation	cephalosporin	1
					beta_lactam__ADC-77	antibiotic inactivation	cephalosporin	5
					beta_lactam__AER-1	antibiotic inactivation	penam	31
					beta_lactam__AIM-1	antibiotic inactivation	cephalosporin, cephamycin, penam	214
					beta_lactam__ALG11-1	antibiotic inactivation	carbapenem	362
					beta_lactam__ALG6-1	antibiotic inactivation	carbapenem	495
					beta_lactam__ANA-1	antibiotic inactivation	carbapenem	64
					beta_lactam__AQU-1	antibiotic inactivation	cephalosporin	89
					beta_lactam__AQU-2	antibiotic inactivation	cephalosporin	4
					beta_lactam__AST-1	antibiotic inactivation	cephalosporin, penam	119
					beta_lactam__ARL-1	antibiotic inactivation	penam	3
					beta_lactam__ARL-2	antibiotic inactivation	penam	1
					beta_lactam__ARL-3	antibiotic inactivation	penam	2
					beta_lactam__ARL-4	antibiotic inactivation	penam	2
					beta_lactam__ARL-5	antibiotic inactivation	penam	3
					beta_lactam__ARL-6	antibiotic inactivation	penam	5
					beta_lactam__AXC-1	antibiotic inactivation	carbapenem	4
					beta_lactam__AXC-2	antibiotic inactivation	carbapenem	15
					beta_lactam__AXC-3	antibiotic inactivation	carbapenem	8
					beta_lactam__BIL-1	antibiotic inactivation	cephalosporin	1
					beta_lactam__AXC-5	antibiotic inactivation	carbapenem	3
					beta_lactam__BAT-1	antibiotic inactivation	cephalosporin	24
					beta_lactam__AXC-4	antibiotic inactivation	carbapenem	7
					beta_lactam__BCL-1	antibiotic inactivation	penam	77
					beta_lactam__BES-1	antibiotic inactivation	penam	4
					beta_lactam__BEL-3	antibiotic inactivation	cephalosporin, monobactam, penam	1
					beta_lactam__BIC-1	antibiotic inactivation	carbapenem	1
					beta_lactam__BJP-1	antibiotic inactivation	carbapenem	504
					beta_lactam__BKC-1	antibiotic inactivation	carbapenem	136
					beta_lactam__BPU-1	antibiotic inactivation	penam	83
					beta_lactam__BSU-1	antibiotic inactivation	carbapenem	22
					beta_lactam__BUT-1	antibiotic inactivation	cephalosporin	9
					beta_lactam__BcI	antibiotic inactivation	cephalosporin, penem	63
					beta_lactam__BcII	antibiotic inactivation	cephalosporin, penem	80
					beta_lactam__BcIII	antibiotic inactivation	cephalosporin, penem	178
					beta_lactam__Bla1	antibiotic inactivation	penam	186
					beta_lactam__Bla2	antibiotic inactivation	carbapenem, cephalosporin, penam	17
					beta_lactam__Burkholderia pseudomallei Omp38	reduced permeability to antibiotic	carbapenem, cephalosporin, cephamycin, monobactam, penam, penem	129
					beta_lactam__CAM-1	antibiotic inactivation	carbapenem, cephalosporin, cephamycin, penam	22
					beta_lactam__CAR-1	antibiotic inactivation	carbapenem	9
					beta_lactam__CARB-1	antibiotic inactivation	penam	28
					beta_lactam__CARB-10	antibiotic inactivation	penam	24
					beta_lactam__CARB-12	antibiotic inactivation	penam	26
					beta_lactam__CARB-14	antibiotic inactivation	penam	16
					beta_lactam__CARB-16	antibiotic inactivation	penam	13
					beta_lactam__CARB-18	antibiotic inactivation	penam	1
					beta_lactam__CARB-2	antibiotic inactivation	penam	26
					beta_lactam__CARB-3	antibiotic inactivation	penam	29
					beta_lactam__CARB-4	antibiotic inactivation	penam	14
					beta_lactam__CARB-19	antibiotic inactivation	penam	3
					beta_lactam__CARB-5	antibiotic inactivation	penam	18
					beta_lactam__CARB-6	antibiotic inactivation	penam	29
					beta_lactam__CARB-8	antibiotic inactivation	penam	14
					beta_lactam__CAU-1	antibiotic inactivation	carbapenem, penam	146
					beta_lactam__CBP-1	antibiotic inactivation	penam	25
					beta_lactam__CFE-1	antibiotic inactivation	cephamycin	3
					beta_lactam__CGA-1	antibiotic inactivation	penam	59
					beta_lactam__CIA-3	antibiotic inactivation	carbapenem, cephalosporin	8
					beta_lactam__CGB-1	antibiotic inactivation	carbapenem, cephalosporin, penam	12
					beta_lactam__CIA-1	antibiotic inactivation	carbapenem, cephalosporin	4
					beta_lactam__CKO-1	antibiotic inactivation	penam	1
					beta_lactam__CMY-1	antibiotic inactivation	cephamycin	32
					beta_lactam__CIA-4	antibiotic inactivation	carbapenem, cephalosporin	1
					beta_lactam__CMA-2	antibiotic inactivation	cephalosporin	2
					beta_lactam__CIA-2	antibiotic inactivation	carbapenem, cephalosporin	1
					beta_lactam__CME-1	antibiotic inactivation	penam	38
					beta_lactam__CMH-1	antibiotic inactivation	cephalosporin	14
					beta_lactam__CMY-10	antibiotic inactivation	cephamycin	9
					beta_lactam__CMY-100	antibiotic inactivation	cephamycin	1
					beta_lactam__CMY-101	antibiotic inactivation	cephamycin	1
					beta_lactam__CMY-104	antibiotic inactivation	cephamycin	2
					beta_lactam__CMY-11	antibiotic inactivation	cephamycin	19
					beta_lactam__CMY-102	antibiotic inactivation	cephamycin	1
					beta_lactam__CMY-115	antibiotic inactivation	cephamycin	1
					beta_lactam__CMY-19	antibiotic inactivation	cephamycin	91
					beta_lactam__CMY-2	antibiotic inactivation	cephamycin	2
					beta_lactam__CMY-37	antibiotic inactivation	cephamycin	1
					beta_lactam__CMY-42	antibiotic inactivation	cephamycin	1
					beta_lactam__CMY-27	antibiotic inactivation	cephamycin	1
					beta_lactam__CMY-29	antibiotic inactivation	cephamycin	1
					beta_lactam__CMY-45	antibiotic inactivation	cephamycin	1
					beta_lactam__CMY-26	antibiotic inactivation	cephamycin	3
					beta_lactam__CMY-34	antibiotic inactivation	cephamycin	6
					beta_lactam__CMY-74	antibiotic inactivation	cephamycin	1
					beta_lactam__CMY-48	antibiotic inactivation	cephamycin	2
					beta_lactam__CMY-64	antibiotic inactivation	cephamycin	2
					beta_lactam__CMY-70	antibiotic inactivation	cephamycin	3
					beta_lactam__CMY-6	antibiotic inactivation	cephamycin	1
					beta_lactam__CMY-57	antibiotic inactivation	cephamycin	2
					beta_lactam__CMY-59	antibiotic inactivation	cephamycin	3
					beta_lactam__CMY-46	antibiotic inactivation	cephamycin	1
					beta_lactam__CMY-55	antibiotic inactivation	cephamycin	1
					beta_lactam__CMY-63	antibiotic inactivation	cephamycin	4
					beta_lactam__CMY-73	antibiotic inactivation	cephamycin	1
					beta_lactam__CMY-8	antibiotic inactivation	cephamycin	126
					beta_lactam__CMY-83	antibiotic inactivation	cephamycin	1
					beta_lactam__CMY-84	antibiotic inactivation	cephamycin	2
					beta_lactam__CMY-82	antibiotic inactivation	cephamycin	2
					beta_lactam__CMY-9	antibiotic inactivation	cephamycin	22
					beta_lactam__CMY-98	antibiotic inactivation	cephamycin	1
					beta_lactam__CMY-93	antibiotic inactivation	cephamycin	2
					beta_lactam__CMY-99	antibiotic inactivation	cephamycin	1
					beta_lactam__CPS-1	antibiotic inactivation	carbapenem	43
					beta_lactam__CRD3-1	antibiotic inactivation	carbapenem	852
					beta_lactam__CRH-1	antibiotic inactivation	carbapenem	2
					beta_lactam__CRH-2	antibiotic inactivation	carbapenem	7
					beta_lactam__CRH-3	antibiotic inactivation	carbapenem	3
					beta_lactam__CRP-1	antibiotic inactivation	carbapenem	4
					beta_lactam__CSA-2	antibiotic inactivation	cephalosporin	4
					beta_lactam__CTX-M-1	antibiotic inactivation	cephalosporin	4
					beta_lactam__CTX-M-11	antibiotic inactivation	cephalosporin	1
					beta_lactam__CTX-M-114	antibiotic inactivation	cephalosporin	1
					beta_lactam__CTX-M-10	antibiotic inactivation	cephalosporin	4
					beta_lactam__CTX-M-100	antibiotic inactivation	cephalosporin	1
					beta_lactam__CTX-M-101	antibiotic inactivation	cephalosporin	1
					beta_lactam__CTX-M-84	antibiotic inactivation	cephalosporin	1
					beta_lactam__CTX-M-107	antibiotic inactivation	cephalosporin	7
					beta_lactam__CTX-M-108	antibiotic inactivation	cephalosporin	10
					beta_lactam__CTX-M-109	antibiotic inactivation	cephalosporin	6
					beta_lactam__CTX-M-115	antibiotic inactivation	cephalosporin	3
					beta_lactam__CTX-M-111	antibiotic inactivation	cephalosporin	1
					beta_lactam__CTX-M-117	antibiotic inactivation	cephalosporin	9
					beta_lactam__CTX-M-122	antibiotic inactivation	cephalosporin	5
					beta_lactam__CTX-M-124	antibiotic inactivation	cephalosporin	1
					beta_lactam__CTX-M-123	antibiotic inactivation	cephalosporin	12
					beta_lactam__CTX-M-13	antibiotic inactivation	cephalosporin	1
					beta_lactam__CTX-M-126	antibiotic inactivation	cephalosporin	1
					beta_lactam__CTX-M-132	antibiotic inactivation	cephalosporin	9
					beta_lactam__CTX-M-134	antibiotic inactivation	cephalosporin	2
					beta_lactam__CTX-M-137	antibiotic inactivation	cephalosporin	4
					beta_lactam__CTX-M-14	antibiotic inactivation	cephalosporin	9
					beta_lactam__CTX-M-141	antibiotic inactivation	cephalosporin	3
					beta_lactam__CTX-M-144	antibiotic inactivation	cephalosporin	3
					beta_lactam__CTX-M-147	antibiotic inactivation	cephalosporin	3
					beta_lactam__CTX-M-129	antibiotic inactivation	cephalosporin	1
					beta_lactam__CTX-M-15	antibiotic inactivation	cephalosporin	10
					beta_lactam__CTX-M-151	antibiotic inactivation	cephalosporin	7
					beta_lactam__CTX-M-16	antibiotic inactivation	cephalosporin	1
					beta_lactam__CTX-M-160	antibiotic inactivation	cephalosporin	6
					beta_lactam__CTX-M-2	antibiotic inactivation	cephalosporin	2
					beta_lactam__CTX-M-19	antibiotic inactivation	cephalosporin	3
					beta_lactam__CTX-M-21	antibiotic inactivation	cephalosporin	5
					beta_lactam__CTX-M-22	antibiotic inactivation	cephalosporin	4
					beta_lactam__CTX-M-152	antibiotic inactivation	cephalosporin	1
					beta_lactam__CTX-M-27	antibiotic inactivation	cephalosporin	16
					beta_lactam__CTX-M-3	antibiotic inactivation	cephalosporin	26
					beta_lactam__CTX-M-23	antibiotic inactivation	cephalosporin	3
					beta_lactam__CTX-M-30	antibiotic inactivation	cephalosporin	4
					beta_lactam__CTX-M-35	antibiotic inactivation	cephalosporin	1
					beta_lactam__CTX-M-38	antibiotic inactivation	cephalosporin	3
					beta_lactam__CTX-M-32	antibiotic inactivation	cephalosporin	1
					beta_lactam__CTX-M-4	antibiotic inactivation	cephalosporin	2
					beta_lactam__CTX-M-42	antibiotic inactivation	cephalosporin	2
					beta_lactam__CTX-M-45	antibiotic inactivation	cephalosporin	5
					beta_lactam__CTX-M-51	antibiotic inactivation	cephalosporin	2
					beta_lactam__CTX-M-52	antibiotic inactivation	cephalosporin	4
					beta_lactam__CTX-M-53	antibiotic inactivation	cephalosporin	5
					beta_lactam__CTX-M-54	antibiotic inactivation	cephalosporin	1
					beta_lactam__CTX-M-55	antibiotic inactivation	cephalosporin	10
					beta_lactam__CTX-M-12	antibiotic inactivation	cephalosporin	1
					beta_lactam__CTX-M-6	antibiotic inactivation	cephalosporin	6
					beta_lactam__CTX-M-62	antibiotic inactivation	cephalosporin	2
					beta_lactam__CTX-M-64	antibiotic inactivation	cephalosporin	8
					beta_lactam__CTX-M-68	antibiotic inactivation	cephalosporin	1
					beta_lactam__CTX-M-7	antibiotic inactivation	cephalosporin	1
					beta_lactam__CTX-M-75	antibiotic inactivation	cephalosporin	1
					beta_lactam__CTX-M-8	antibiotic inactivation	cephalosporin	1
					beta_lactam__CTX-M-82	antibiotic inactivation	cephalosporin	1
					beta_lactam__CTX-M-87	antibiotic inactivation	cephalosporin	1
					beta_lactam__CTX-M-26	antibiotic inactivation	cephalosporin	2
					beta_lactam__CTX-M-95	antibiotic inactivation	cephalosporin	1
					beta_lactam__CTX-M-74	antibiotic inactivation	cephalosporin	2
					beta_lactam__CVI-1	antibiotic inactivation	carbapenem	11
					beta_lactam__CTX-M-9	antibiotic inactivation	cephalosporin	1
					beta_lactam__CTX-M-99	antibiotic inactivation	cephalosporin	3
					beta_lactam__CblA-1	antibiotic inactivation	cephalosporin	5
					beta_lactam__CcrA beta-lactamase	antibiotic inactivation	carbapenem	1
					beta_lactam__CepS	antibiotic inactivation	cephalosporin	29
					beta_lactam__CfxA	antibiotic inactivation	cephamycin	12
					beta_lactam__CfxA2	antibiotic inactivation	cephamycin	28
					beta_lactam__CfxA3	antibiotic inactivation	cephamycin	20
					beta_lactam__Chryseobacterium meningosepticum BlaB	antibiotic inactivation	carbapenem, penam	2
					beta_lactam__CfxA4	antibiotic inactivation	cephamycin	14
					beta_lactam__CfxA5	antibiotic inactivation	cephamycin	19
					beta_lactam__CfxA6	antibiotic inactivation	cephamycin	24
					beta_lactam__DES-1	antibiotic inactivation	penam	5
					beta_lactam__DHA-1	antibiotic inactivation	cephalosporin, cephamycin	14
					beta_lactam__DHA-10	antibiotic inactivation	cephalosporin, cephamycin	2
					beta_lactam__DHA-12	antibiotic inactivation	cephalosporin, cephamycin	6
					beta_lactam__DHA-13	antibiotic inactivation	cephalosporin, cephamycin	6
					beta_lactam__DHA-14	antibiotic inactivation	cephalosporin, cephamycin	3
					beta_lactam__DHA-15	antibiotic inactivation	cephalosporin, cephamycin	3
					beta_lactam__DHA-16	antibiotic inactivation	cephalosporin, cephamycin	3
					beta_lactam__DHA-17	antibiotic inactivation	cephalosporin, cephamycin	6
					beta_lactam__DHA-18	antibiotic inactivation	cephalosporin, cephamycin	2
					beta_lactam__DHA-19	antibiotic inactivation	cephalosporin, cephamycin	7
					beta_lactam__DHA-2	antibiotic inactivation	cephalosporin, cephamycin	2
					beta_lactam__DHA-20	antibiotic inactivation	cephalosporin, cephamycin	9
					beta_lactam__DHA-21	antibiotic inactivation	cephalosporin, cephamycin	7
					beta_lactam__DHA-22	antibiotic inactivation	cephalosporin, cephamycin	15
					beta_lactam__DHA-5	antibiotic inactivation	cephalosporin, cephamycin	3
					beta_lactam__DHA-6	antibiotic inactivation	cephalosporin, cephamycin	6
					beta_lactam__DHA-7	antibiotic inactivation	cephalosporin, cephamycin	11
					beta_lactam__DHA-9	antibiotic inactivation	cephalosporin, cephamycin	10
					beta_lactam__DHT2-1	antibiotic inactivation	carbapenem	341
					beta_lactam__DIM-1	antibiotic inactivation	carbapenem, cephalosporin	4
					beta_lactam__EAM-1	antibiotic inactivation	carbapenem	4
					beta_lactam__ECM-1	antibiotic inactivation	carbapenem	7
					beta_lactam__EBR-1	antibiotic inactivation	carbapenem, cephalosporin, penam	10
					beta_lactam__EBR-2	antibiotic inactivation	carbapenem, cephalosporin, penam	1
					beta_lactam__ECV-1	antibiotic inactivation	carbapenem	9
					beta_lactam__EFM-1	antibiotic inactivation	carbapenem	54
					beta_lactam__ELM-1	antibiotic inactivation	carbapenem	16
					beta_lactam__ERP-1	antibiotic inactivation	penam	12
					beta_lactam__ESP-1	antibiotic inactivation	carbapenem	105
					beta_lactam__EVM-1	antibiotic inactivation	carbapenem	50
					beta_lactam__EXO beta-lactamase	antibiotic inactivation	penam	401
					beta_lactam__Escherichia coli ampC	antibiotic inactivation	cephalosporin, penam	43
					beta_lactam__FAR-1	antibiotic inactivation	penam	47
					beta_lactam__FEZ-1	antibiotic inactivation	carbapenem, cephalosporin, penam	663
					beta_lactam__FIA-1	antibiotic inactivation	carbapenem	22
					beta_lactam__FOX-3	antibiotic inactivation	cephalosporin, cephamycin	1
					beta_lactam__FOX-1	antibiotic inactivation	cephalosporin, cephamycin	1
					beta_lactam__FOX-2	antibiotic inactivation	cephalosporin, cephamycin	37
					beta_lactam__FOX-4	antibiotic inactivation	cephalosporin, cephamycin	7
					beta_lactam__FOX-5	antibiotic inactivation	cephalosporin, cephamycin	16
					beta_lactam__FOX-7	antibiotic inactivation	cephalosporin, cephamycin	33
					beta_lactam__FRI-2	antibiotic inactivation	penam	1
					beta_lactam__FRI-1	antibiotic inactivation	penam	1
					beta_lactam__FRI-3	antibiotic inactivation	penam	1
					beta_lactam__GES-14	antibiotic inactivation	carbapenem, cephalosporin, penam	1
					beta_lactam__GES-15	antibiotic inactivation	carbapenem, cephalosporin, penam	3
					beta_lactam__FOX-8	antibiotic inactivation	cephalosporin, cephamycin	1
					beta_lactam__GES-21	antibiotic inactivation	carbapenem, cephalosporin, penam	2
					beta_lactam__GES-3	antibiotic inactivation	carbapenem, cephalosporin, penam	1
					beta_lactam__GES-7	antibiotic inactivation	carbapenem, cephalosporin, penam	1
					beta_lactam__FONA-6	antibiotic inactivation	penam	1
					beta_lactam__GIL-1	antibiotic inactivation	carbapenem, cephalosporin	25
					beta_lactam__GIM-1	antibiotic inactivation	carbapenem, cephalosporin, cephamycin, monobactam, penam, penem	6
					beta_lactam__GMB-1	antibiotic inactivation	carbapenem	8
					beta_lactam__GOB-1	antibiotic inactivation	carbapenem, cephalosporin, penam	4
					beta_lactam__GOB-10	antibiotic inactivation	carbapenem, cephalosporin, penam	1
					beta_lactam__GOB-11	antibiotic inactivation	carbapenem, cephalosporin, penam	8
					beta_lactam__GOB-12	antibiotic inactivation	carbapenem, cephalosporin, penam	2
					beta_lactam__GOB-13	antibiotic inactivation	carbapenem, cephalosporin, penam	9
					beta_lactam__GOB-14	antibiotic inactivation	carbapenem, cephalosporin, penam	1
					beta_lactam__GOB-15	antibiotic inactivation	carbapenem, cephalosporin, penam	1
					beta_lactam__GOB-16	antibiotic inactivation	carbapenem, cephalosporin, penam	116
					beta_lactam__GOB-18	antibiotic inactivation	carbapenem, cephalosporin, penam	5
					beta_lactam__GOB-2	antibiotic inactivation	carbapenem, cephalosporin, penam	5
					beta_lactam__GOB-3	antibiotic inactivation	carbapenem, cephalosporin, penam	6
					beta_lactam__GOB-33	antibiotic inactivation	carbapenem, cephalosporin, penam	5
					beta_lactam__GOB-36	antibiotic inactivation	carbapenem, cephalosporin, penam	9
					beta_lactam__GOB-4	antibiotic inactivation	carbapenem, cephalosporin, penam	4
					beta_lactam__GOB-5	antibiotic inactivation	carbapenem, cephalosporin, penam	5
					beta_lactam__GOB-6	antibiotic inactivation	carbapenem, cephalosporin, penam	19
					beta_lactam__GOB-7	antibiotic inactivation	carbapenem, cephalosporin, penam	3
					beta_lactam__GOB-8	antibiotic inactivation	carbapenem, cephalosporin, penam	1
					beta_lactam__GOB-9	antibiotic inactivation	carbapenem, cephalosporin, penam	1
					beta_lactam__GPC-1	antibiotic inactivation	carbapenem	143
					beta_lactam__GRD33-1	antibiotic inactivation	carbapenem	277
					beta_lactam__HERA-1	antibiotic inactivation	penam	6
					beta_lactam__HERA-2	antibiotic inactivation	penam	2
					beta_lactam__HERA-4	antibiotic inactivation	penam	3
					beta_lactam__HERA-5	antibiotic inactivation	penam	1
					beta_lactam__HERA-6	antibiotic inactivation	penam	3
					beta_lactam__HERA-8	antibiotic inactivation	penam	8
					beta_lactam__HMB-1	antibiotic inactivation	carbapenem	13
					beta_lactam__IDC-1	antibiotic inactivation	carbapenem, cephalosporin	127
					beta_lactam__IDC-2	antibiotic inactivation	carbapenem, cephalosporin	163
					beta_lactam__IMI-1	antibiotic inactivation	carbapenem	1
					beta_lactam__IMP-1	antibiotic inactivation	carbapenem, cephalosporin, cephamycin, penam, penem	2
					beta_lactam__IMP-11	antibiotic inactivation	carbapenem, cephalosporin, cephamycin, penam, penem	7
					beta_lactam__IMP-10	antibiotic inactivation	carbapenem, cephalosporin, cephamycin, penam, penem	1
					beta_lactam__IMP-15	antibiotic inactivation	carbapenem, cephalosporin, cephamycin, penam, penem	3
					beta_lactam__IMP-16	antibiotic inactivation	carbapenem, cephalosporin, cephamycin, penam, penem	5
					beta_lactam__IND-8	antibiotic inactivation	carbapenem	1
					beta_lactam__IMP-19	antibiotic inactivation	carbapenem, cephalosporin, cephamycin, penam, penem	7
					beta_lactam__IMP-2	antibiotic inactivation	carbapenem, cephalosporin, cephamycin, penam, penem	3
					beta_lactam__IMP-20	antibiotic inactivation	carbapenem, cephalosporin, cephamycin, penam, penem	2
					beta_lactam__IMP-21	antibiotic inactivation	carbapenem, cephalosporin, cephamycin, penam, penem	6
					beta_lactam__IMP-22	antibiotic inactivation	carbapenem, cephalosporin, cephamycin, penam, penem	5
					beta_lactam__IMP-24	antibiotic inactivation	carbapenem, cephalosporin, cephamycin, penam, penem	9
					beta_lactam__IMP-13	antibiotic inactivation	carbapenem, cephalosporin, cephamycin, penam, penem	1
					beta_lactam__IMP-27	antibiotic inactivation	carbapenem, cephalosporin, cephamycin, penam, penem	1
					beta_lactam__IMP-28	antibiotic inactivation	carbapenem, cephalosporin, cephamycin, penam, penem	2
					beta_lactam__IMP-26	antibiotic inactivation	carbapenem, cephalosporin, cephamycin, penam, penem	1
					beta_lactam__IMP-33	antibiotic inactivation	carbapenem, cephalosporin, cephamycin, penam, penem	5
					beta_lactam__IMP-37	antibiotic inactivation	carbapenem, cephalosporin, cephamycin, penam, penem	8
					beta_lactam__IMP-4	antibiotic inactivation	carbapenem, cephalosporin, cephamycin, penam, penem	1
					beta_lactam__IMP-43	antibiotic inactivation	carbapenem, cephalosporin, cephamycin, penam, penem	2
					beta_lactam__IMP-44	antibiotic inactivation	carbapenem, cephalosporin, cephamycin, penam, penem	1
					beta_lactam__IMP-48	antibiotic inactivation	carbapenem, cephalosporin, cephamycin, penam, penem	4
					beta_lactam__IMP-5	antibiotic inactivation	carbapenem, cephalosporin, cephamycin, penam, penem	4
					beta_lactam__IMP-7	antibiotic inactivation	carbapenem, cephalosporin, cephamycin, penam, penem	1
					beta_lactam__IMP-8	antibiotic inactivation	carbapenem, cephalosporin, cephamycin, penam, penem	14
					beta_lactam__IND-9	antibiotic inactivation	carbapenem	3
					beta_lactam__IMP-12	antibiotic inactivation	carbapenem, cephalosporin, cephamycin, penam, penem	1
					beta_lactam__IMP-14	antibiotic inactivation	carbapenem, cephalosporin, cephamycin, penam, penem	7
					beta_lactam__IMP-18	antibiotic inactivation	carbapenem, cephalosporin, cephamycin, penam, penem	7
					beta_lactam__IMP-31	antibiotic inactivation	carbapenem, cephalosporin, cephamycin, penam, penem	1
					beta_lactam__IMP-42	antibiotic inactivation	carbapenem, cephalosporin, cephamycin, penam, penem	1
					beta_lactam__IMP-52	antibiotic inactivation	carbapenem, cephalosporin, cephamycin, penam, penem	1
					beta_lactam__IMP-9	antibiotic inactivation	carbapenem, cephalosporin, cephamycin, penam, penem	2
					beta_lactam__IND-1	antibiotic inactivation	carbapenem	1
					beta_lactam__IMP-45	antibiotic inactivation	carbapenem, cephalosporin, cephamycin, penam, penem	1
					beta_lactam__IND-14	antibiotic inactivation	carbapenem	4
					beta_lactam__IND-12	antibiotic inactivation	carbapenem	1
					beta_lactam__IND-3	antibiotic inactivation	carbapenem	7
					beta_lactam__IND-5	antibiotic inactivation	carbapenem	1
					beta_lactam__IMP-49	antibiotic inactivation	carbapenem, cephalosporin, cephamycin, penam, penem	1
					beta_lactam__IND-4	antibiotic inactivation	carbapenem	4
					beta_lactam__IND-7	antibiotic inactivation	carbapenem	5
					beta_lactam__IND-2a	antibiotic inactivation	carbapenem	1
					beta_lactam__IND-2	antibiotic inactivation	carbapenem	1
					beta_lactam__JOHN-1	antibiotic inactivation	carbapenem, cephalosporin, penam	123
					beta_lactam__KHM-1	antibiotic inactivation	carbapenem, cephalosporin, cephamycin, penam, penem	63
					beta_lactam__KPC-16	antibiotic inactivation	carbapenem, cephalosporin, monobactam, penam	2
					beta_lactam__KPC-19	antibiotic inactivation	carbapenem, cephalosporin, monobactam, penam	1
					beta_lactam__KPC-2	antibiotic inactivation	carbapenem, cephalosporin, monobactam, penam	5
					beta_lactam__KPC-22	antibiotic inactivation	carbapenem, cephalosporin, monobactam, penam	1
					beta_lactam__KPC-24	antibiotic inactivation	carbapenem, cephalosporin, monobactam, penam	1
					beta_lactam__KPC-3	antibiotic inactivation	carbapenem, cephalosporin, monobactam, penam	9
					beta_lactam__KPC-15	antibiotic inactivation	carbapenem, cephalosporin, monobactam, penam	3
					beta_lactam__KPC-9	antibiotic inactivation	carbapenem, cephalosporin, monobactam, penam	2
					beta_lactam__Klebsiella pneumoniae OmpK37	reduced permeability to antibiotic	carbapenem, cephalosporin, cephamycin, monobactam, penam, penem	153
					beta_lactam__L1 beta-lactamase	antibiotic inactivation	cephalosporin	350
					beta_lactam__LAP-1	antibiotic inactivation	cephalosporin, penam, penem	7
					beta_lactam__LAP-2	antibiotic inactivation	cephalosporin, penam, penem	12
					beta_lactam__LEN-15	antibiotic inactivation	penam, penem	4
					beta_lactam__LEN-17	antibiotic inactivation	penam, penem	1
					beta_lactam__LEN-11	antibiotic inactivation	penam, penem	9
					beta_lactam__LCR-1	antibiotic inactivation	cephalosporin, penam	15
					beta_lactam__LEN-12	antibiotic inactivation	penam, penem	1
					beta_lactam__LEN-13	antibiotic inactivation	penam, penem	1
					beta_lactam__LEN-21	antibiotic inactivation	penam, penem	6
					beta_lactam__LEN-26	antibiotic inactivation	penam, penem	52
					beta_lactam__LEN-37	antibiotic inactivation	penam, penem	1
					beta_lactam__LEN-39	antibiotic inactivation	penam, penem	4
					beta_lactam__LEN-3	antibiotic inactivation	penam, penem	7
					beta_lactam__LEN-40	antibiotic inactivation	penam, penem	2
					beta_lactam__LEN-41	antibiotic inactivation	penam, penem	9
					beta_lactam__LEN-42	antibiotic inactivation	penam, penem	6
					beta_lactam__LEN-43	antibiotic inactivation	penam, penem	3
					beta_lactam__LEN-6	antibiotic inactivation	penam, penem	22
					beta_lactam__LEN-7	antibiotic inactivation	penam, penem	3
					beta_lactam__LEN-9	antibiotic inactivation	penam, penem	1
					beta_lactam__LMB-1	antibiotic inactivation	carbapenem, cephalosporin, penam	119
					beta_lactam__LRA-1	antibiotic inactivation	cephalosporin, penam	138
					beta_lactam__LRA-10	antibiotic inactivation	cephalosporin, penam	341
					beta_lactam__LRA-12	antibiotic inactivation	cephalosporin, penam	398
					beta_lactam__LRA-13	antibiotic inactivation	cephalosporin, penam	56
					beta_lactam__LRA-17	antibiotic inactivation	cephalosporin, penam	131
					beta_lactam__LRA-18	antibiotic inactivation	cephalosporin, penam	46
					beta_lactam__LRA-19	antibiotic inactivation	cephalosporin, penam	439
					beta_lactam__LRA-2	antibiotic inactivation	cephalosporin, penam	105
					beta_lactam__LRA-3	antibiotic inactivation	cephalosporin, penam	518
					beta_lactam__LRA-5	antibiotic inactivation	cephalosporin, penam	285
					beta_lactam__LRA-7	antibiotic inactivation	cephalosporin, penam	177
					beta_lactam__LRA-8	antibiotic inactivation	cephalosporin, penam	115
					beta_lactam__LRA-9	antibiotic inactivation	cephalosporin, penam	226
					beta_lactam__LRG-1	antibiotic inactivation	cephalosporin	2
					beta_lactam__LUS-1	antibiotic inactivation	carbapenem, cephalosporin	27
					beta_lactam__LUT-1	antibiotic inactivation	cephalosporin	13
					beta_lactam__LUT-2	antibiotic inactivation	cephalosporin	10
					beta_lactam__LUT-3	antibiotic inactivation	cephalosporin	60
					beta_lactam__LUT-4	antibiotic inactivation	cephalosporin	43
					beta_lactam__LUT-5	antibiotic inactivation	cephalosporin	45
					beta_lactam__LUT-6	antibiotic inactivation	cephalosporin	128
					beta_lactam__Laribacter hongkongensis ampC beta-lactamase	antibiotic inactivation	cephalosporin, penam	4
					beta_lactam__MAB	antibiotic inactivation	cephalosporin, penam, penem	13
					beta_lactam__MOX-1	antibiotic inactivation	cephalosporin, cephamycin, penam	4
					beta_lactam__MOX-2	antibiotic inactivation	cephalosporin, cephamycin, penam	30
					beta_lactam__MIR-10	antibiotic inactivation	cephalosporin, monobactam	1
					beta_lactam__MIR-11	antibiotic inactivation	cephalosporin, monobactam	3
					beta_lactam__MIR-12	antibiotic inactivation	cephalosporin, monobactam	1
					beta_lactam__MIR-13	antibiotic inactivation	cephalosporin, monobactam	1
					beta_lactam__MIR-14	antibiotic inactivation	cephalosporin, monobactam	14
					beta_lactam__MIR-15	antibiotic inactivation	cephalosporin, monobactam	1
					beta_lactam__MIR-17	antibiotic inactivation	cephalosporin, monobactam	5
					beta_lactam__MIR-2	antibiotic inactivation	cephalosporin, monobactam	4
					beta_lactam__MIR-23	antibiotic inactivation	cephalosporin, monobactam	21
					beta_lactam__MIR-3	antibiotic inactivation	cephalosporin, monobactam	2
					beta_lactam__MIR-4	antibiotic inactivation	cephalosporin, monobactam	1
					beta_lactam__MIR-5	antibiotic inactivation	cephalosporin, monobactam	4
					beta_lactam__MIR-6	antibiotic inactivation	cephalosporin, monobactam	10
					beta_lactam__MIR-9	antibiotic inactivation	cephalosporin, monobactam	5
					beta_lactam__MOX-3	antibiotic inactivation	cephalosporin, cephamycin, penam	64
					beta_lactam__MOX-4	antibiotic inactivation	cephalosporin, cephamycin, penam	55
					beta_lactam__MOX-5	antibiotic inactivation	cephalosporin, cephamycin, penam	3
					beta_lactam__MOX-6	antibiotic inactivation	cephalosporin, cephamycin, penam	5
					beta_lactam__MOX-7	antibiotic inactivation	cephalosporin, cephamycin, penam	88
					beta_lactam__MOX-8	antibiotic inactivation	cephalosporin, cephamycin, penam	103
					beta_lactam__MOX-9	antibiotic inactivation	cephalosporin, cephamycin, penam	21
					beta_lactam__MSI-1	antibiotic inactivation	carbapenem	54
					beta_lactam__MSI-OXA	antibiotic inactivation	carbapenem	33
					beta_lactam__MUS-2	antibiotic inactivation	carbapenem	1
					beta_lactam__MYO-1	antibiotic inactivation	carbapenem	37
					beta_lactam__MYX-1	antibiotic inactivation	carbapenem	78
					beta_lactam__NDM-1	antibiotic inactivation	carbapenem, cephalosporin, cephamycin, penam	7
					beta_lactam__NDM-10	antibiotic inactivation	carbapenem, cephalosporin, cephamycin, penam	9
					beta_lactam__NDM-12	antibiotic inactivation	carbapenem, cephalosporin, cephamycin, penam	2
					beta_lactam__NDM-13	antibiotic inactivation	carbapenem, cephalosporin, cephamycin, penam	1
					beta_lactam__NDM-14	antibiotic inactivation	carbapenem, cephalosporin, cephamycin, penam	4
					beta_lactam__NDM-15	antibiotic inactivation	carbapenem, cephalosporin, cephamycin, penam	5
					beta_lactam__NDM-16	antibiotic inactivation	carbapenem, cephalosporin, cephamycin, penam	2
					beta_lactam__NDM-19	antibiotic inactivation	carbapenem, cephalosporin, cephamycin, penam	6
					beta_lactam__NDM-2	antibiotic inactivation	carbapenem, cephalosporin, cephamycin, penam	7
					beta_lactam__NDM-3	antibiotic inactivation	carbapenem, cephalosporin, cephamycin, penam	4
					beta_lactam__NDM-5	antibiotic inactivation	carbapenem, cephalosporin, cephamycin, penam	8
					beta_lactam__NDM-7	antibiotic inactivation	carbapenem, cephalosporin, cephamycin, penam	5
					beta_lactam__NDM-9	antibiotic inactivation	carbapenem, cephalosporin, cephamycin, penam	1
					beta_lactam__NPS-1	antibiotic inactivation	cephalosporin, penam	13
					beta_lactam__OCH-1	antibiotic inactivation	cephalosporin, cephamycin, monobactam, penam, penem	7
					beta_lactam__OCH-2	antibiotic inactivation	cephalosporin, cephamycin, monobactam, penam, penem	14
					beta_lactam__OCH-3	antibiotic inactivation	cephalosporin, cephamycin, monobactam, penam, penem	48
					beta_lactam__OCH-4	antibiotic inactivation	cephalosporin, cephamycin, monobactam, penam, penem	17
					beta_lactam__OCH-5	antibiotic inactivation	cephalosporin, cephamycin, monobactam, penam, penem	14
					beta_lactam__OCH-6	antibiotic inactivation	cephalosporin, cephamycin, monobactam, penam, penem	5
					beta_lactam__OCH-7	antibiotic inactivation	cephalosporin, cephamycin, monobactam, penam, penem	6
					beta_lactam__OCH-8	antibiotic inactivation	cephalosporin, cephamycin, monobactam, penam, penem	60
					beta_lactam__OKP-A-16	antibiotic inactivation	cephalosporin, penam	4
					beta_lactam__OKP-A-6	antibiotic inactivation	cephalosporin, penam	2
					beta_lactam__OKP-B-13	antibiotic inactivation	cephalosporin, penam	4
					beta_lactam__OKP-A-7	antibiotic inactivation	cephalosporin, penam	1
					beta_lactam__OKP-A-4	antibiotic inactivation	cephalosporin, penam	1
					beta_lactam__OKP-B-12	antibiotic inactivation	cephalosporin, penam	10
					beta_lactam__OKP-A-5	antibiotic inactivation	cephalosporin, penam	1
					beta_lactam__OKP-B-19	antibiotic inactivation	cephalosporin, penam	1
					beta_lactam__OKP-B-2	antibiotic inactivation	cephalosporin, penam	1
					beta_lactam__OKP-B-4	antibiotic inactivation	cephalosporin, penam	80
					beta_lactam__OKP-B-5	antibiotic inactivation	cephalosporin, penam	2
					beta_lactam__ORN-1	antibiotic inactivation	carbapenem, cephalosporin	2
					beta_lactam__ORN-2	antibiotic inactivation	carbapenem, cephalosporin	1
					beta_lactam__ORN-4	antibiotic inactivation	carbapenem, cephalosporin	1
					beta_lactam__ORN-3	antibiotic inactivation	carbapenem, cephalosporin	1
					beta_lactam__OKP-B-9	antibiotic inactivation	cephalosporin, penam	1
					beta_lactam__OKP-B-6	antibiotic inactivation	cephalosporin, penam	1
					beta_lactam__OKP-B-8	antibiotic inactivation	cephalosporin, penam	1
					beta_lactam__ORN-5	antibiotic inactivation	carbapenem, cephalosporin	10
					beta_lactam__OXA-1	antibiotic inactivation	penam	35
					beta_lactam__OXA-10	antibiotic inactivation	penam	52
					beta_lactam__OXA-104	antibiotic inactivation	penam	1
					beta_lactam__OXA-111	antibiotic inactivation	penam	1
					beta_lactam__OXA-114a	antibiotic inactivation	penam	12
					beta_lactam__OXA-101	antibiotic inactivation	penam	3
					beta_lactam__OXA-117	antibiotic inactivation	penam	3
					beta_lactam__OXA-103	antibiotic inactivation	penam	1
					beta_lactam__OXA-118	antibiotic inactivation	penam	72
					beta_lactam__OKP-A-12	antibiotic inactivation	cephalosporin, penam	1
					beta_lactam__OXA-119	antibiotic inactivation	penam	69
					beta_lactam__OXA-12	antibiotic inactivation	penam	19
					beta_lactam__OXA-13	antibiotic inactivation	penam	10
					beta_lactam__OXA-134	antibiotic inactivation	penam	6
					beta_lactam__OXA-164	antibiotic inactivation	penam	5
					beta_lactam__OXA-126	antibiotic inactivation	penam	1
					beta_lactam__OXA-129	antibiotic inactivation	penam	24
					beta_lactam__OXA-14	antibiotic inactivation	penam	2
					beta_lactam__OXA-140	antibiotic inactivation	penam	22
					beta_lactam__OXA-142	antibiotic inactivation	penam	6
					beta_lactam__OXA-145	antibiotic inactivation	penam	1
					beta_lactam__OXA-147	antibiotic inactivation	penam	23
					beta_lactam__OXA-153	antibiotic inactivation	penam	1
					beta_lactam__OXA-15	antibiotic inactivation	penam	5
					beta_lactam__OXA-17	antibiotic inactivation	penam	2
					beta_lactam__OXA-151	antibiotic inactivation	penam	6
					beta_lactam__OXA-154	antibiotic inactivation	penam	2
					beta_lactam__OXA-155	antibiotic inactivation	penam	1
					beta_lactam__OXA-163	antibiotic inactivation	penam	1
					beta_lactam__OXA-18	antibiotic inactivation	penam	34
					beta_lactam__OXA-181	antibiotic inactivation	penam	1
					beta_lactam__OXA-16	antibiotic inactivation	penam	2
					beta_lactam__OXA-183	antibiotic inactivation	penam	4
					beta_lactam__OXA-19	antibiotic inactivation	penam	8
					beta_lactam__OXA-196	antibiotic inactivation	penam	1
					beta_lactam__OXA-152	antibiotic inactivation	penam	5
					beta_lactam__OXA-198	antibiotic inactivation	penam	34
					beta_lactam__OXA-182	antibiotic inactivation	carbapenem, penam	1
					beta_lactam__OXA-2	antibiotic inactivation	penam	90
					beta_lactam__OXA-20	antibiotic inactivation	penam	54
					beta_lactam__OXA-205	antibiotic inactivation	penam	36
					beta_lactam__OXA-209	antibiotic inactivation	penam	74
					beta_lactam__OXA-21	antibiotic inactivation	penam	97
					beta_lactam__OXA-211	antibiotic inactivation	penam	18
					beta_lactam__OXA-214	antibiotic inactivation	penam	2
					beta_lactam__OXA-215	antibiotic inactivation	penam	2
					beta_lactam__OXA-212	antibiotic inactivation	penam	13
					beta_lactam__OXA-22	antibiotic inactivation	penam	68
					beta_lactam__OXA-224	antibiotic inactivation	penam	1
					beta_lactam__OXA-226	antibiotic inactivation	penam	12
					beta_lactam__OXA-235	antibiotic inactivation	penam	2
					beta_lactam__OXA-255	antibiotic inactivation	penam	1
					beta_lactam__OXA-236	antibiotic inactivation	penam	4
					beta_lactam__OXA-23	antibiotic inactivation	penam	1
					beta_lactam__OXA-237	antibiotic inactivation	penam	7
					beta_lactam__OXA-240	antibiotic inactivation	penam	1
					beta_lactam__OXA-246	antibiotic inactivation	penam	6
					beta_lactam__OXA-247	antibiotic inactivation	penam	1
					beta_lactam__OXA-251	antibiotic inactivation	penam	5
					beta_lactam__OXA-252	antibiotic inactivation	penam	1
					beta_lactam__OXA-257	antibiotic inactivation	penam	1
					beta_lactam__OXA-250	antibiotic inactivation	carbapenem, penam	1
					beta_lactam__OXA-270	antibiotic inactivation	penam	6
					beta_lactam__OXA-273	antibiotic inactivation	penam	1
					beta_lactam__OXA-253	antibiotic inactivation	penam	1
					beta_lactam__OXA-266	antibiotic inactivation	penam	1
					beta_lactam__OXA-274	antibiotic inactivation	penam	12
					beta_lactam__OXA-258	antibiotic inactivation	penam	5
					beta_lactam__OXA-26	antibiotic inactivation	penam	1
					beta_lactam__OXA-272	antibiotic inactivation	penam	1
					beta_lactam__OXA-275	antibiotic inactivation	penam	13
					beta_lactam__OXA-276	antibiotic inactivation	penam	2
					beta_lactam__OXA-286	antibiotic inactivation	penam	2
					beta_lactam__OXA-277	antibiotic inactivation	penam	6
					beta_lactam__OXA-278	antibiotic inactivation	penam	8
					beta_lactam__OXA-28	antibiotic inactivation	penam	6
					beta_lactam__OXA-280	antibiotic inactivation	penam	1
					beta_lactam__OXA-281	antibiotic inactivation	penam	9
					beta_lactam__OXA-282	antibiotic inactivation	penam	6
					beta_lactam__OXA-283	antibiotic inactivation	penam	7
					beta_lactam__OXA-284	antibiotic inactivation	penam	10
					beta_lactam__OXA-285	antibiotic inactivation	penam	4
					beta_lactam__OXA-232	antibiotic inactivation	penam	4
					beta_lactam__OXA-243	antibiotic inactivation	penam	4
					beta_lactam__OXA-229	antibiotic inactivation	penam	1
					beta_lactam__OXA-265	antibiotic inactivation	penam	1
					beta_lactam__OXA-29	antibiotic inactivation	penam	93
					beta_lactam__OXA-296	antibiotic inactivation	penam	23
					beta_lactam__OXA-299	antibiotic inactivation	penam	1
					beta_lactam__OXA-298	antibiotic inactivation	penam	2
					beta_lactam__OXA-291	antibiotic inactivation	penam	1
					beta_lactam__OXA-3	antibiotic inactivation	penam	88
					beta_lactam__OXA-300	antibiotic inactivation	penam	2
					beta_lactam__OXA-31	antibiotic inactivation	penam	1
					beta_lactam__OXA-320	antibiotic inactivation	penam	3
					beta_lactam__OXA-304	antibiotic inactivation	penam	1
					beta_lactam__OXA-305	antibiotic inactivation	penam	2
					beta_lactam__OXA-301	antibiotic inactivation	penam	2
					beta_lactam__OXA-309	antibiotic inactivation	penam	3
					beta_lactam__OXA-324	antibiotic inactivation	penam	3
					beta_lactam__OXA-33	antibiotic inactivation	penam	16
					beta_lactam__OXA-333	antibiotic inactivation	penam	1
					beta_lactam__OXA-308	antibiotic inactivation	penam	1
					beta_lactam__OXA-334	antibiotic inactivation	penam	7
					beta_lactam__OXA-34	antibiotic inactivation	penam	37
					beta_lactam__OXA-335	antibiotic inactivation	penam	4
					beta_lactam__OXA-347	antibiotic inactivation	penam	55
					beta_lactam__OXA-356	antibiotic inactivation	penam	1
					beta_lactam__OXA-358	antibiotic inactivation	penam	3
					beta_lactam__OXA-359	antibiotic inactivation	penam	1
					beta_lactam__OXA-36	antibiotic inactivation	penam	75
					beta_lactam__OXA-360	antibiotic inactivation	penam	8
					beta_lactam__OXA-361	antibiotic inactivation	penam	7
					beta_lactam__OXA-362	antibiotic inactivation	penam	8
					beta_lactam__OXA-364	antibiotic inactivation	penam	8
					beta_lactam__OXA-363	antibiotic inactivation	penam	9
					beta_lactam__OXA-368	antibiotic inactivation	penam	1
					beta_lactam__OXA-37	antibiotic inactivation	penam	31
					beta_lactam__OXA-372	antibiotic inactivation	penam	5
					beta_lactam__OXA-373	antibiotic inactivation	penam	16
					beta_lactam__OXA-397	antibiotic inactivation	penam	3
					beta_lactam__OXA-436	antibiotic inactivation	penam	1
					beta_lactam__OXA-405	antibiotic inactivation	penam	2
					beta_lactam__OXA-408	antibiotic inactivation	penam	1
					beta_lactam__OXA-417	antibiotic inactivation	penam	11
					beta_lactam__OXA-421	antibiotic inactivation	penam	1
					beta_lactam__OXA-42	antibiotic inactivation	penam	2
					beta_lactam__OXA-392	antibiotic inactivation	penam	6
					beta_lactam__OXA-407	antibiotic inactivation	penam	2
					beta_lactam__OXA-420	antibiotic inactivation	penam	3
					beta_lactam__OXA-450	antibiotic inactivation	penam	2
					beta_lactam__OXA-427	antibiotic inactivation	penam	48
					beta_lactam__OXA-443	antibiotic inactivation	penam	26
					beta_lactam__OXA-444	antibiotic inactivation	penam	91
					beta_lactam__OXA-455	antibiotic inactivation	penam	7
					beta_lactam__OXA-45	antibiotic inactivation	penam	7
					beta_lactam__OXA-458	antibiotic inactivation	penam	4
					beta_lactam__OXA-457	antibiotic inactivation	penam	14
					beta_lactam__OXA-459	antibiotic inactivation	penam	8
					beta_lactam__OXA-46	antibiotic inactivation	penam	9
					beta_lactam__OXA-464	antibiotic inactivation	penam	4
					beta_lactam__OXA-48	antibiotic inactivation	penam	2
					beta_lactam__OXA-47	antibiotic inactivation	penam	8
					beta_lactam__OXA-460	antibiotic inactivation	penam	1
					beta_lactam__OXA-484	antibiotic inactivation	penam	1
					beta_lactam__OXA-485	antibiotic inactivation	penam	24
					beta_lactam__OXA-486	antibiotic inactivation	penam	91
					beta_lactam__OXA-488	antibiotic inactivation	penam	11
					beta_lactam__OXA-5	antibiotic inactivation	penam	22
					beta_lactam__OXA-50	antibiotic inactivation	penam	160
					beta_lactam__OXA-53	antibiotic inactivation	penam	50
					beta_lactam__OXA-535	antibiotic inactivation	penam	2
					beta_lactam__OXA-549	antibiotic inactivation	penam	1
					beta_lactam__OXA-55	antibiotic inactivation	carbapenem, penam	1
					beta_lactam__OXA-550	antibiotic inactivation	penam	2
					beta_lactam__OXA-551	antibiotic inactivation	penam	7
					beta_lactam__OXA-552	antibiotic inactivation	penam	3
					beta_lactam__OXA-568	antibiotic inactivation	penam	1
					beta_lactam__OXA-56	antibiotic inactivation	penam	1
					beta_lactam__OXA-569	antibiotic inactivation	penam	7
					beta_lactam__OXA-57	antibiotic inactivation	penam	1
					beta_lactam__OXA-570	antibiotic inactivation	penam	11
					beta_lactam__OXA-54	antibiotic inactivation	penam	5
					beta_lactam__OXA-573	antibiotic inactivation	penam	9
					beta_lactam__OXA-574	antibiotic inactivation	penam	7
					beta_lactam__OXA-58	antibiotic inactivation	penam	11
					beta_lactam__OXA-59	antibiotic inactivation	penam	1
					beta_lactam__OXA-60	antibiotic inactivation	penam	41
					beta_lactam__OXA-727	antibiotic inactivation	penam	14
					beta_lactam__OXA-728	antibiotic inactivation	penam	5
					beta_lactam__OXA-664	antibiotic inactivation	penam	4
					beta_lactam__OXA-72	antibiotic inactivation	penam	1
					beta_lactam__OXA-724	antibiotic inactivation	penam	7
					beta_lactam__OXA-69	antibiotic inactivation	penam	1
					beta_lactam__OXA-75	antibiotic inactivation	carbapenem, penam	1
					beta_lactam__OXA-837	antibiotic inactivation	penam	16
					beta_lactam__OXA-65	antibiotic inactivation	penam	1
					beta_lactam__OXA-67	antibiotic inactivation	penam	1
					beta_lactam__OXA-71	antibiotic inactivation	penam	1
					beta_lactam__OXA-85	antibiotic inactivation	penam	5
					beta_lactam__OXA-9	antibiotic inactivation	penam	2
					beta_lactam__OXA-900	antibiotic inactivation	penam	1
					beta_lactam__OXA-919	antibiotic inactivation	penam	15
					beta_lactam__OXA-62	antibiotic inactivation	penam	10
					beta_lactam__OXA-90	antibiotic inactivation	penam	1
					beta_lactam__OXA-7	antibiotic inactivation	penam	1
					beta_lactam__OXA-926	antibiotic inactivation	penam	50
					beta_lactam__OXY-6-3	antibiotic inactivation	cephalosporin, monobactam, penam	1
					beta_lactam__OXY-2-1	antibiotic inactivation	cephalosporin, monobactam, penam	1
					beta_lactam__OXA-93	antibiotic inactivation	penam	1
					beta_lactam__OXA-98	antibiotic inactivation	penam	1
					beta_lactam__OXY-1-2	antibiotic inactivation	cephalosporin, monobactam, penam	1
					beta_lactam__PDC-80	antibiotic inactivation	carbapenem, cephalosporin, monobactam	2
					beta_lactam__PDC-87	antibiotic inactivation	carbapenem, cephalosporin, monobactam	1
					beta_lactam__OXY-2-8	antibiotic inactivation	cephalosporin, monobactam, penam	2
					beta_lactam__OXA-96	antibiotic inactivation	penam	6
					beta_lactam__OXA-97	antibiotic inactivation	penam	3
					beta_lactam__OXY-2-9	antibiotic inactivation	cephalosporin, monobactam, penam	1
					beta_lactam__OXY-3-1	antibiotic inactivation	cephalosporin, monobactam, penam	1
					beta_lactam__OXY-2-5	antibiotic inactivation	cephalosporin, monobactam, penam	1
					beta_lactam__OXY-5-1	antibiotic inactivation	cephalosporin, monobactam, penam	1
					beta_lactam__OXY-1-4	antibiotic inactivation	cephalosporin, monobactam, penam	1
					beta_lactam__Other class A beta-lactamase	antibiotic inactivation	other	27
					beta_lactam__Other class C beta-lactamase	antibiotic inactivation	other	9
					beta_lactam__PAC-1	antibiotic inactivation	cephalosporin	3
					beta_lactam__PAU-1	antibiotic inactivation	carbapenem, cephalosporin	71
					beta_lactam__PDC-1	antibiotic inactivation	carbapenem, cephalosporin, monobactam	3
					beta_lactam__PDC-10	antibiotic inactivation	carbapenem, cephalosporin, monobactam	13
					beta_lactam__PDC-2	antibiotic inactivation	carbapenem, cephalosporin, monobactam	3
					beta_lactam__PDC-3	antibiotic inactivation	carbapenem, cephalosporin, monobactam	3
					beta_lactam__PDC-8	antibiotic inactivation	carbapenem, cephalosporin, monobactam	7
					beta_lactam__PDC-74	antibiotic inactivation	carbapenem, cephalosporin, monobactam	1
					beta_lactam__PDC-82	antibiotic inactivation	carbapenem, cephalosporin, monobactam	1
					beta_lactam__PDC-85	antibiotic inactivation	carbapenem, cephalosporin, monobactam	1
					beta_lactam__PDC-86	antibiotic inactivation	carbapenem, cephalosporin, monobactam	1
					beta_lactam__PDC-5	antibiotic inactivation	carbapenem, cephalosporin, monobactam	7
					beta_lactam__PDC-7	antibiotic inactivation	carbapenem, cephalosporin, monobactam	11
					beta_lactam__PDC-9	antibiotic inactivation	carbapenem, cephalosporin, monobactam	6
					beta_lactam__PDC-90	antibiotic inactivation	carbapenem, cephalosporin, monobactam	1
					beta_lactam__PDC-93	antibiotic inactivation	carbapenem, cephalosporin, monobactam	4
					beta_lactam__PDC-91	antibiotic inactivation	carbapenem, cephalosporin, monobactam	1
					beta_lactam__PEDO-1	antibiotic inactivation	carbapenem	351
					beta_lactam__PEDO-2	antibiotic inactivation	carbapenem	55
					beta_lactam__PEDO-3	antibiotic inactivation	carbapenem	4
					beta_lactam__PER-1	antibiotic inactivation	carbapenem, cephalosporin, monobactam, penam, penem	30
					beta_lactam__PER-2	antibiotic inactivation	carbapenem, cephalosporin, monobactam, penam, penem	18
					beta_lactam__PER-3	antibiotic inactivation	carbapenem, cephalosporin, monobactam, penam, penem	15
					beta_lactam__PER-4	antibiotic inactivation	carbapenem, cephalosporin, monobactam, penam, penem	7
					beta_lactam__PER-5	antibiotic inactivation	carbapenem, cephalosporin, monobactam, penam, penem	6
					beta_lactam__PER-6	antibiotic inactivation	carbapenem, cephalosporin, monobactam, penam, penem	14
					beta_lactam__PER-7	antibiotic inactivation	carbapenem, cephalosporin, monobactam, penam, penem	32
					beta_lactam__PFM-1	antibiotic inactivation	carbapenem	7
					beta_lactam__PFM-3	antibiotic inactivation	carbapenem	3
					beta_lactam__PLA-2a	antibiotic inactivation	carbapenem, cephalosporin	2
					beta_lactam__PLA-3	antibiotic inactivation	carbapenem, cephalosporin	1
					beta_lactam__PLA-6	antibiotic inactivation	carbapenem, cephalosporin	4
					beta_lactam__PLN-1	antibiotic inactivation	carbapenem	279
					beta_lactam__PME-1	antibiotic inactivation	carbapenem	8
					beta_lactam__PNGM-1	antibiotic inactivation	carbapenem, cephalosporin, penam	5
					beta_lactam__POM-1	antibiotic inactivation	carbapenem	14
					beta_lactam__POM-2	antibiotic inactivation	carbapenem	200
					beta_lactam__PRC-1	antibiotic inactivation	cephalosporin, penam	57
					beta_lactam__PSV-1	antibiotic inactivation	carbapenem, cephalosporin	1
					beta_lactam__R39 beta-lactamase	antibiotic inactivation	penam	47
					beta_lactam__RAHN-1	antibiotic inactivation	cephalosporin	1
					beta_lactam__ROB-1	antibiotic inactivation	cephalosporin, penam	2
					beta_lactam__RSA-1	antibiotic inactivation	carbapenem, cephalosporin	4
					beta_lactam__PST-1	antibiotic inactivation	carbapenem	15
					beta_lactam__PST-2	antibiotic inactivation	carbapenem	9
					beta_lactam__RCP-1	antibiotic inactivation	penam	8
					beta_lactam__RAHN-2	antibiotic inactivation	cephalosporin	5
					beta_lactam__RSA-2	antibiotic inactivation	carbapenem, cephalosporin	10
					beta_lactam__RSA2-1	antibiotic inactivation	carbapenem	16
					beta_lactam__RSD2-1	antibiotic inactivation	carbapenem, cephalosporin	1
					beta_lactam__RSD2-2	antibiotic inactivation	carbapenem, cephalosporin	4
					beta_lactam__RUB-1	antibiotic inactivation	cephalosporin	3
					beta_lactam__Rhodobacter sphaeroides ampC	antibiotic inactivation	cephalosporin, penam	99
					beta_lactam__Rm3	antibiotic inactivation	carbapenem, cephalosporin, penam	276
					beta_lactam__SCO-1	antibiotic inactivation	penam	7
					beta_lactam__SGM-1	antibiotic inactivation	carbapenem	59
					beta_lactam__SGM-2	antibiotic inactivation	carbapenem	47
					beta_lactam__SGM-3	antibiotic inactivation	carbapenem	48
					beta_lactam__SGM-4	antibiotic inactivation	carbapenem	67
					beta_lactam__SGM-5	antibiotic inactivation	carbapenem	45
					beta_lactam__SGM-6	antibiotic inactivation	carbapenem	46
					beta_lactam__SGM-7	antibiotic inactivation	carbapenem	13
					beta_lactam__SHV-1	antibiotic inactivation	carbapenem, cephalosporin, penam	13
					beta_lactam__SHV-105	antibiotic inactivation	carbapenem, cephalosporin, penam	1
					beta_lactam__SHV-11	antibiotic inactivation	carbapenem, cephalosporin, penam	3
					beta_lactam__SHV-121	antibiotic inactivation	carbapenem, cephalosporin, penam	6
					beta_lactam__SHV-112	antibiotic inactivation	carbapenem, cephalosporin, penam	1
					beta_lactam__SHV-123	antibiotic inactivation	carbapenem, cephalosporin, penam	5
					beta_lactam__SHV-134	antibiotic inactivation	carbapenem, cephalosporin, penam	3
					beta_lactam__SHV-135	antibiotic inactivation	carbapenem, cephalosporin, penam	2
					beta_lactam__SHV-137	antibiotic inactivation	carbapenem, cephalosporin, penam	2
					beta_lactam__SHV-156	antibiotic inactivation	carbapenem, cephalosporin, penam	3
					beta_lactam__SHV-167	antibiotic inactivation	carbapenem, cephalosporin, penam	1
					beta_lactam__SHV-14	antibiotic inactivation	cephalosporin, penam	1
					beta_lactam__SHV-180	antibiotic inactivation	cephalosporin, penam	1
					beta_lactam__SHV-22	antibiotic inactivation	carbapenem, cephalosporin, penam	15
					beta_lactam__SHV-25	antibiotic inactivation	carbapenem, cephalosporin, penam	5
					beta_lactam__SHV-168	antibiotic inactivation	carbapenem, cephalosporin, penam	2
					beta_lactam__SHV-147	antibiotic inactivation	cephalosporin, penam	1
					beta_lactam__SHV-23	antibiotic inactivation	carbapenem, cephalosporin, penam	7
					beta_lactam__SHV-39	antibiotic inactivation	carbapenem, cephalosporin, penam	2
					beta_lactam__SHV-4	antibiotic inactivation	carbapenem, cephalosporin, penam	5
					beta_lactam__SHV-32	antibiotic inactivation	carbapenem, cephalosporin, penam	3
					beta_lactam__SHV-37	antibiotic inactivation	carbapenem, cephalosporin, penam	4
					beta_lactam__SHV-41	antibiotic inactivation	carbapenem, cephalosporin, penam	44
					beta_lactam__SHV-48	antibiotic inactivation	carbapenem, cephalosporin, penam	1
					beta_lactam__SHV-80	antibiotic inactivation	carbapenem, cephalosporin, penam	1
					beta_lactam__SHV-42	antibiotic inactivation	carbapenem, cephalosporin, penam	4
					beta_lactam__SHV-53	antibiotic inactivation	carbapenem, cephalosporin, penam	9
					beta_lactam__SHV-65	antibiotic inactivation	carbapenem, cephalosporin, penam	2
					beta_lactam__SHV-6	antibiotic inactivation	carbapenem, cephalosporin, penam	2
					beta_lactam__SHV-70	antibiotic inactivation	carbapenem, cephalosporin, penam	4
					beta_lactam__SHV-52	antibiotic inactivation	carbapenem, cephalosporin, penam	2
					beta_lactam__SHV-89	antibiotic inactivation	cephalosporin, penam	1
					beta_lactam__SHV-9	antibiotic inactivation	carbapenem, cephalosporin, penam	6
					beta_lactam__SIM-1	antibiotic inactivation	carbapenem, cephalosporin, penam	8
					beta_lactam__SMB-1	antibiotic inactivation	carbapenem, cephalosporin, penam	99
					beta_lactam__SME-2	antibiotic inactivation	carbapenem	2
					beta_lactam__SPG-1	antibiotic inactivation	carbapenem	63
					beta_lactam__SPM-1	antibiotic inactivation	carbapenem	36
					beta_lactam__SPN79-1	antibiotic inactivation	carbapenem	32
					beta_lactam__SPR-1	antibiotic inactivation	carbapenem	1
					beta_lactam__SPU-1	antibiotic inactivation	carbapenem	4
					beta_lactam__SRT-2	antibiotic inactivation	cephalosporin	21
					beta_lactam__STA-1	antibiotic inactivation	carbapenem	1
					beta_lactam__Sed1 beta-lactamase	antibiotic inactivation	cephalosporin, penam	36
					beta_lactam__TEM-1	antibiotic inactivation	cephalosporin, monobactam, penam, penem	74
					beta_lactam__TEM-102	antibiotic inactivation	cephalosporin, monobactam, penam, penem	4
					beta_lactam__TEM-106	antibiotic inactivation	cephalosporin, monobactam, penam, penem	1
					beta_lactam__TEM-107	antibiotic inactivation	cephalosporin, monobactam, penam, penem	1
					beta_lactam__TEM-109	antibiotic inactivation	cephalosporin, monobactam, penam, penem	2
					beta_lactam__TEM-114	antibiotic inactivation	cephalosporin, monobactam, penam, penem	6
					beta_lactam__TEM-116	antibiotic inactivation	cephalosporin, monobactam, penam, penem	8
					beta_lactam__TEM-117	antibiotic inactivation	cephalosporin, monobactam, penam, penem	72
					beta_lactam__TEM-118	antibiotic inactivation	cephalosporin, monobactam, penam, penem	18
					beta_lactam__TEM-12	antibiotic inactivation	cephalosporin, monobactam, penam, penem	15
					beta_lactam__TEM-121	antibiotic inactivation	cephalosporin, monobactam, penam, penem	1
					beta_lactam__TEM-123	antibiotic inactivation	cephalosporin, monobactam, penam, penem	3
					beta_lactam__TEM-125	antibiotic inactivation	cephalosporin, monobactam, penam, penem	1
					beta_lactam__TEM-129	antibiotic inactivation	cephalosporin, monobactam, penam, penem	1
					beta_lactam__TEM-127	antibiotic inactivation	cephalosporin, monobactam, penam, penem	7
					beta_lactam__TEM-133	antibiotic inactivation	cephalosporin, monobactam, penam, penem	2
					beta_lactam__TEM-136	antibiotic inactivation	cephalosporin, monobactam, penam, penem	9
					beta_lactam__TEM-143	antibiotic inactivation	cephalosporin, monobactam, penam, penem	2
					beta_lactam__TEM-146	antibiotic inactivation	cephalosporin, monobactam, penam, penem	1
					beta_lactam__TEM-147	antibiotic inactivation	cephalosporin, monobactam, penam, penem	3
					beta_lactam__TEM-149	antibiotic inactivation	cephalosporin, monobactam, penam, penem	3
					beta_lactam__TEM-15	antibiotic inactivation	cephalosporin, monobactam, penam, penem	2
					beta_lactam__TEM-153	antibiotic inactivation	cephalosporin, monobactam, penam, penem	2
					beta_lactam__TEM-157	antibiotic inactivation	cephalosporin, monobactam, penam, penem	3
					beta_lactam__TEM-159	antibiotic inactivation	cephalosporin, monobactam, penam, penem	4
					beta_lactam__TEM-16	antibiotic inactivation	cephalosporin, monobactam, penam, penem	2
					beta_lactam__TEM-162	antibiotic inactivation	cephalosporin, monobactam, penam, penem	33
					beta_lactam__TEM-164	antibiotic inactivation	cephalosporin, monobactam, penam, penem	4
					beta_lactam__TEM-168	antibiotic inactivation	cephalosporin, monobactam, penam, penem	1
					beta_lactam__TEM-169	antibiotic inactivation	cephalosporin, monobactam, penam, penem	1
					beta_lactam__TEM-171	antibiotic inactivation	cephalosporin, monobactam, penam, penem	5
					beta_lactam__TEM-177	antibiotic inactivation	cephalosporin, monobactam, penam, penem	2
					beta_lactam__TEM-178	antibiotic inactivation	cephalosporin, monobactam, penam, penem	18
					beta_lactam__TEM-184	antibiotic inactivation	cephalosporin, monobactam, penam, penem	8
					beta_lactam__TEM-185	antibiotic inactivation	cephalosporin, monobactam, penam, penem	14
					beta_lactam__TEM-187	antibiotic inactivation	cephalosporin, monobactam, penam, penem	20
					beta_lactam__TEM-192	antibiotic inactivation	cephalosporin, monobactam, penam, penem	39
					beta_lactam__TEM-193	antibiotic inactivation	cephalosporin, monobactam, penam, penem	38
					beta_lactam__TEM-194	antibiotic inactivation	cephalosporin, monobactam, penam, penem	3
					beta_lactam__TEM-197	antibiotic inactivation	cephalosporin, monobactam, penam, penem	3
					beta_lactam__TEM-199	antibiotic inactivation	cephalosporin, monobactam, penam, penem	1
					beta_lactam__TEM-205	antibiotic inactivation	cephalosporin, monobactam, penam, penem	18
					beta_lactam__TEM-21	antibiotic inactivation	cephalosporin, monobactam, penam, penem	1
					beta_lactam__TEM-211	antibiotic inactivation	cephalosporin, monobactam, penam, penem	1
					beta_lactam__TEM-220	antibiotic inactivation	cephalosporin, monobactam, penam, penem	1
					beta_lactam__TEM-3	antibiotic inactivation	cephalosporin, monobactam, penam, penem	3
					beta_lactam__TEM-48	antibiotic inactivation	cephalosporin, monobactam, penam, penem	1
					beta_lactam__TEM-52	antibiotic inactivation	cephalosporin, monobactam, penam, penem	1
					beta_lactam__TEM-55	antibiotic inactivation	cephalosporin, monobactam, penam, penem	1
					beta_lactam__TEM-57	antibiotic inactivation	cephalosporin, monobactam, penam, penem	2
					beta_lactam__TEM-59	antibiotic inactivation	cephalosporin, monobactam, penam, penem	2
					beta_lactam__TEM-6	antibiotic inactivation	cephalosporin, monobactam, penam, penem	6
					beta_lactam__TEM-63	antibiotic inactivation	cephalosporin, monobactam, penam, penem	16
					beta_lactam__TEM-67	antibiotic inactivation	cephalosporin, monobactam, penam, penem	1
					beta_lactam__TEM-217	antibiotic inactivation	cephalosporin, monobactam, penam, penem	1
					beta_lactam__TEM-7	antibiotic inactivation	cephalosporin, monobactam, penam, penem	36
					beta_lactam__TEM-70	antibiotic inactivation	cephalosporin, monobactam, penam, penem	1
					beta_lactam__TEM-72	antibiotic inactivation	cephalosporin, monobactam, penam, penem	1
					beta_lactam__TEM-75	antibiotic inactivation	cephalosporin, monobactam, penam, penem	8
					beta_lactam__TEM-78	antibiotic inactivation	cephalosporin, monobactam, penam, penem	1
					beta_lactam__TEM-8	antibiotic inactivation	cephalosporin, monobactam, penam, penem	1
					beta_lactam__TEM-83	antibiotic inactivation	cephalosporin, monobactam, penam, penem	3
					beta_lactam__TEM-87	antibiotic inactivation	cephalosporin, monobactam, penam, penem	23
					beta_lactam__TEM-88	antibiotic inactivation	cephalosporin, monobactam, penam, penem	3
					beta_lactam__TEM-91	antibiotic inactivation	cephalosporin, monobactam, penam, penem	2
					beta_lactam__TEM-60	antibiotic inactivation	cephalosporin, monobactam, penam, penem	1
					beta_lactam__TEM-94	antibiotic inactivation	cephalosporin, monobactam, penam, penem	3
					beta_lactam__TEM-95	antibiotic inactivation	cephalosporin, monobactam, penam, penem	6
					beta_lactam__TER-1	antibiotic inactivation	carbapenem, cephalosporin	7
					beta_lactam__TER-2	antibiotic inactivation	carbapenem, cephalosporin	95
					beta_lactam__THIN-B beta-lactamase	antibiotic inactivation	carbapenem, cephalosporin, penam	454
					beta_lactam__TLA-1	antibiotic inactivation	cephalosporin, monobactam	159
					beta_lactam__TLA-2	antibiotic inactivation	cephalosporin, monobactam	53
					beta_lactam__TLA-3	antibiotic inactivation	cephalosporin, monobactam	167
					beta_lactam__TTU-1	antibiotic inactivation	carbapenem	1
					beta_lactam__VAM-1	antibiotic inactivation	carbapenem, cephalosporin	2
					beta_lactam__TMB-2	antibiotic inactivation	carbapenem, cephalosporin, cephamycin	1
					beta_lactam__TRU-1	antibiotic inactivation	cephalosporin, penam	4
					beta_lactam__VEB-1	antibiotic inactivation	cephalosporin, monobactam	27
					beta_lactam__VEB-1b	antibiotic inactivation	cephalosporin, monobactam	1
					beta_lactam__VEB-3	antibiotic inactivation	cephalosporin, monobactam	10
					beta_lactam__VEB-4	antibiotic inactivation	cephalosporin, monobactam	4
					beta_lactam__VEB-5	antibiotic inactivation	cephalosporin, monobactam	5
					beta_lactam__VEB-6	antibiotic inactivation	cephalosporin, monobactam	14
					beta_lactam__VEB-7	antibiotic inactivation	cephalosporin, monobactam	8
					beta_lactam__VEB-8	antibiotic inactivation	cephalosporin, monobactam	7
					beta_lactam__VEB-9	antibiotic inactivation	cephalosporin, monobactam	9
					beta_lactam__VHW-1	antibiotic inactivation	carbapenem, cephalosporin	1
					beta_lactam__VIM-1	antibiotic inactivation	carbapenem, cephalosporin, cephamycin, penam, penem	95
					beta_lactam__VIM-13	antibiotic inactivation	carbapenem, cephalosporin, cephamycin, penam, penem	9
					beta_lactam__VIM-14	antibiotic inactivation	carbapenem, cephalosporin, cephamycin, penam, penem	2
					beta_lactam__VIM-18	antibiotic inactivation	carbapenem, cephalosporin, cephamycin, penam, penem	1
					beta_lactam__VIM-2	antibiotic inactivation	carbapenem, cephalosporin, cephamycin, penam, penem	5
					beta_lactam__VIM-20	antibiotic inactivation	carbapenem, cephalosporin, cephamycin, penam, penem	2
					beta_lactam__VIM-23	antibiotic inactivation	carbapenem, cephalosporin, cephamycin, penam, penem	1
					beta_lactam__VIM-25	antibiotic inactivation	carbapenem, cephalosporin, cephamycin, penam, penem	1
					beta_lactam__VIM-26	antibiotic inactivation	carbapenem, cephalosporin, cephamycin, penam, penem	2
					beta_lactam__VIM-16	antibiotic inactivation	carbapenem, cephalosporin, cephamycin, penam, penem	1
					beta_lactam__VIM-28	antibiotic inactivation	carbapenem, cephalosporin, cephamycin, penam, penem	2
					beta_lactam__VIM-29	antibiotic inactivation	carbapenem, cephalosporin, cephamycin, penam, penem	6
					beta_lactam__VIM-3	antibiotic inactivation	carbapenem, cephalosporin, cephamycin, penam, penem	1
					beta_lactam__VIM-34	antibiotic inactivation	carbapenem, cephalosporin, cephamycin, penam, penem	2
					beta_lactam__VIM-39	antibiotic inactivation	carbapenem, cephalosporin, cephamycin, penam, penem	1
					beta_lactam__VIM-4	antibiotic inactivation	carbapenem, cephalosporin, cephamycin, penam, penem	1
					beta_lactam__VIM-5	antibiotic inactivation	carbapenem, cephalosporin, cephamycin, penam, penem	2
					beta_lactam__VIM-7	antibiotic inactivation	carbapenem, cephalosporin, cephamycin, penam, penem	4
					beta_lactam__VMB-1	antibiotic inactivation	carbapenem	5
					beta_lactam__YEM-1	antibiotic inactivation	carbapenem	5
					beta_lactam__Yrc-1	antibiotic inactivation	cephalosporin, penam	8
					beta_lactam__blaC	antibiotic inactivation	cephalosporin, cephamycin, penam, penem	120
					beta_lactam__blaF	antibiotic inactivation	penam	751
					beta_lactam__blaS1	antibiotic inactivation	cephalosporin, penam	445
					beta_lactam__blaZ	antibiotic inactivation	penam	21
					beta_lactam__cepA	antibiotic inactivation	cephalosporin	9
					beta_lactam__cphA2	antibiotic inactivation	carbapenem	8
					beta_lactam__cphA5	antibiotic inactivation	carbapenem	2
					beta_lactam__cphA3	antibiotic inactivation	carbapenem	3
					beta_lactam__cphA6	antibiotic inactivation	carbapenem	11
					beta_lactam__cphA7	antibiotic inactivation	carbapenem	8
					beta_lactam__imiH	antibiotic inactivation	carbapenem	1
					beta_lactam__imiS	antibiotic inactivation	carbapenem	3
					beta_lactam__mecB	antibiotic target replacement	penam	4
					beta_lactam__mecA	antibiotic target replacement	penam	30
					beta_lactam__mreA	antibiotic efflux	macrolide antibiotic	3
					beta_lactam__mecC	antibiotic target replacement	penam	1
					beta_lactam__y56	antibiotic inactivation	cephalosporin, penam, penem	37
					bicyclomycin__bcr-1	antibiotic efflux	bicyclomycin-like antibiotic	24
					bleomycin__BLMT	antibiotic inactivation	glycopeptide antibiotic	32
					bleomycin__bleomycin resistance protein	antibiotic inactivation	glycopeptide antibiotic	158
					chloramphenicol__Agrobacterium fabrum chloramphenicol acetyltransferase	antibiotic inactivation	phenicol antibiotic	276
					chloramphenicol__Bacillus clausii chloramphenicol acetyltransferase	antibiotic inactivation	phenicol antibiotic	36
					chloramphenicol__CatU	antibiotic inactivation	phenicol antibiotic	10
					chloramphenicol__Bacillus pumilus cat86	antibiotic inactivation	phenicol antibiotic	75
					chloramphenicol__Campylobacter coli chloramphenicol acetyltransferase	antibiotic inactivation	phenicol antibiotic	22
					chloramphenicol__Clostridium butyricum catB	antibiotic inactivation	phenicol antibiotic	30
					chloramphenicol__Enterococcus faecalis chloramphenicol acetyltransferase	antibiotic inactivation	phenicol antibiotic	3
					chloramphenicol__Enterococcus faecium chloramphenicol acetyltransferase	antibiotic inactivation	phenicol antibiotic	5
					chloramphenicol__Lactobacillus reuteri cat-TC	antibiotic inactivation	phenicol antibiotic	44
					chloramphenicol__Pseudomonas aeruginos catB6	antibiotic inactivation	phenicol antibiotic	65
					chloramphenicol__Pseudomonas aeruginos catB7	antibiotic inactivation	phenicol antibiotic	134
					chloramphenicol__Salmonella enterica cmlA	antibiotic efflux	phenicol antibiotic	34
					chloramphenicol__Staphylococcus intermedius chloramphenicol acetyltransferase	antibiotic inactivation	phenicol antibiotic	5
					chloramphenicol__Streptococcus suis chloramphenicol acetyltransferase	antibiotic inactivation	phenicol antibiotic	47
					chloramphenicol__Streptomyces lividans cmlR	antibiotic efflux	phenicol antibiotic	478
					chloramphenicol__Vibrio anguillarum chloramphenicol acetyltransferase	antibiotic inactivation	phenicol antibiotic	8
					chloramphenicol__catA4	antibiotic inactivation	phenicol antibiotic	3
					chloramphenicol__catA8	antibiotic inactivation	phenicol antibiotic	26
					chloramphenicol__catB10	antibiotic inactivation	phenicol antibiotic	184
					chloramphenicol__catB11	antibiotic inactivation	phenicol antibiotic	296
					chloramphenicol__catB2	antibiotic inactivation	phenicol antibiotic	180
					chloramphenicol__catB3	antibiotic inactivation	phenicol antibiotic	219
					chloramphenicol__catB8	antibiotic inactivation	phenicol antibiotic	169
					chloramphenicol__catB9	antibiotic inactivation	phenicol antibiotic	76
					chloramphenicol__catD	antibiotic inactivation	phenicol antibiotic	12
					chloramphenicol__catI	antibiotic inactivation	phenicol antibiotic	19
					chloramphenicol__catIII	antibiotic inactivation	phenicol antibiotic	1
					chloramphenicol__catII from Escherichia coli K-12	antibiotic inactivation	phenicol antibiotic	8
					chloramphenicol__catQ	antibiotic inactivation	phenicol antibiotic	53
					chloramphenicol__catV	antibiotic inactivation	phenicol antibiotic	5
					chloramphenicol__cmlA1	antibiotic efflux	phenicol antibiotic	21
					chloramphenicol__cmlA4	antibiotic efflux	phenicol antibiotic	26
					chloramphenicol__cmlA5	antibiotic efflux	phenicol antibiotic	65
					chloramphenicol__cmlA6	antibiotic efflux	phenicol antibiotic	39
					chloramphenicol__cmlA8	antibiotic efflux	phenicol antibiotic	14
					chloramphenicol__cmlB	antibiotic efflux	phenicol antibiotic	12
					chloramphenicol__cmlB1	antibiotic efflux	phenicol antibiotic	27
					chloramphenicol__cmlv	antibiotic inactivation	phenicol antibiotic	452
					chloramphenicol__cmrA	antibiotic efflux	phenicol antibiotic	246
					chloramphenicol__cmx	antibiotic efflux	phenicol antibiotic	347
					chloramphenicol__fexA	antibiotic efflux	phenicol antibiotic	65
					chloramphenicol__pexA	antibiotic efflux	phenicol antibiotic	16
					chloramphenicol__plasmid-encoded cat (pp-cat)	antibiotic inactivation	phenicol antibiotic	1
					defensin__Bacillus subtilis mprF	antibiotic target alteration	peptide antibiotic	84
					defensin__Brucella suis mprF	antibiotic target alteration	peptide antibiotic	188
					edeine__EdeQ	antibiotic inactivation	peptide antibiotic, polyamine antibiotic	3
					defensin__Listeria monocytogenes mprF	antibiotic target alteration	peptide antibiotic	3
					defensin__Clostridium perfringens mprF	antibiotic target alteration	peptide antibiotic	7
					defensin__Streptococcus agalactiae mprF	antibiotic target alteration	peptide antibiotic	2
					factumycin__facT	antibiotic efflux	elfamycin antibiotic	224
					florfenicol__floR	antibiotic efflux	phenicol antibiotic	479
					florfenicol__pp-flo	antibiotic efflux	phenicol antibiotic	73
					fosfomycin__Acinetobacter baumannii AbaF	antibiotic efflux	phosphonic acid antibiotic	495
					fosfomycin__FomA	antibiotic inactivation	phosphonic acid antibiotic	11
					fosfomycin__FomB	antibiotic inactivation	phosphonic acid antibiotic	33
					fosfomycin__FosA	antibiotic inactivation	phosphonic acid antibiotic	138
					fosfomycin__FosA2	antibiotic inactivation	phosphonic acid antibiotic	3
					fosfomycin__FosA3	antibiotic inactivation	phosphonic acid antibiotic	26
					fosfomycin__FosA4	antibiotic inactivation	phosphonic acid antibiotic	1
					fosfomycin__FosA5	antibiotic inactivation	phosphonic acid antibiotic	9
					fosfomycin__FosA6	antibiotic inactivation	phosphonic acid antibiotic	14
					fosfomycin__FosA7	antibiotic inactivation	phosphonic acid antibiotic	22
					fosfomycin__FosB	antibiotic inactivation	phosphonic acid antibiotic	350
					fosfomycin__FosB1	antibiotic inactivation	phosphonic acid antibiotic	9
					fosfomycin__FosB3	antibiotic inactivation	phosphonic acid antibiotic	10
					fosfomycin__FosB4	antibiotic inactivation	phosphonic acid antibiotic	10
					fosfomycin__FosB5	antibiotic inactivation	phosphonic acid antibiotic	13
					fosfomycin__FosB6	antibiotic inactivation	phosphonic acid antibiotic	10
					fosfomycin__FosC2	antibiotic inactivation	phosphonic acid antibiotic	31
					fosfomycin__FosM1	antibiotic inactivation	phosphonic acid antibiotic	52
					fosfomycin__FosD	antibiotic inactivation	phosphonic acid antibiotic	9
					fosfomycin__FosK	antibiotic inactivation	phosphonic acid antibiotic	12
					fosfomycin__FosL1	antibiotic inactivation	phosphonic acid antibiotic	7
					fosfomycin__FosM2	antibiotic inactivation	phosphonic acid antibiotic	97
					fosfomycin__FosX	antibiotic inactivation	phosphonic acid antibiotic	180
					fusidic_acid__FusF	antibiotic target protection	fusidane antibiotic	1
					fusidic_acid__fusH	antibiotic inactivation	fusidane antibiotic	29
					fusidic_acid__fusD	antibiotic target protection	fusidane antibiotic	1
					macrolide-lincosamide-streptogramin__Erm(52)	antibiotic target protection	lincosamide antibiotic, macrolide antibiotic, streptogramin antibiotic	17
					macrolide-lincosamide-streptogramin__LlmA 23S ribosomal RNA methyltransferase	antibiotic target protection	lincosamide antibiotic	383
					macrolide-lincosamide-streptogramin__LpeA	antibiotic efflux	macrolide antibiotic	8
					macrolide-lincosamide-streptogramin__LpeB	antibiotic efflux	macrolide antibiotic	452
					macrolide-lincosamide-streptogramin__RlmA(II)	antibiotic target protection	lincosamide antibiotic, macrolide antibiotic	3
					macrolide-lincosamide-streptogramin__VatI	antibiotic inactivation	streptogramin antibiotic	84
					macrolide-lincosamide-streptogramin__VgbC	antibiotic inactivation	streptogramin antibiotic	9
					macrolide-lincosamide-streptogramin__carA	antibiotic target protection	macrolide antibiotic	335
					macrolide-lincosamide-streptogramin__cfr(A)	antibiotic target protection	lincosamide antibiotic, oxazolidinone antibiotic, phenicol antibiotic, pleuromutilin antibiotic, streptogramin antibiotic	49
					macrolide-lincosamide-streptogramin__cfr(B)	antibiotic target protection	lincosamide antibiotic, oxazolidinone antibiotic, phenicol antibiotic, streptogramin antibiotic	50
					macrolide-lincosamide-streptogramin__cfr(C)	antibiotic target protection	lincosamide antibiotic, oxazolidinone antibiotic, phenicol antibiotic, streptogramin antibiotic	92
					macrolide-lincosamide-streptogramin__cfr(D)	antibiotic target protection	lincosamide antibiotic, oxazolidinone antibiotic, phenicol antibiotic, streptogramin antibiotic	12
					macrolide-lincosamide-streptogramin__cfr(E)	antibiotic target protection	lincosamide antibiotic, oxazolidinone antibiotic, phenicol antibiotic, streptogramin antibiotic	37
					macrolide-lincosamide-streptogramin__chrB	antibiotic target protection	lincosamide antibiotic, macrolide antibiotic	32
					macrolide-lincosamide-streptogramin__cipA	antibiotic target protection	lincosamide antibiotic, oxazolidinone antibiotic, phenicol antibiotic, pleuromutilin antibiotic, streptogramin antibiotic	53
					macrolide-lincosamide-streptogramin__clbA	antibiotic target protection	lincosamide antibiotic, oxazolidinone antibiotic, phenicol antibiotic, streptogramin antibiotic	38
					macrolide-lincosamide-streptogramin__clbB	antibiotic target protection	lincosamide antibiotic, oxazolidinone antibiotic, phenicol antibiotic, streptogramin antibiotic	96
					macrolide-lincosamide-streptogramin__clbC	antibiotic target protection	lincosamide antibiotic, oxazolidinone antibiotic, phenicol antibiotic, streptogramin antibiotic	41
					macrolide-lincosamide-streptogramin__clcD	antibiotic target protection	lincosamide antibiotic, oxazolidinone antibiotic, phenicol antibiotic, pleuromutilin antibiotic, streptogramin antibiotic	59
					macrolide-lincosamide-streptogramin__emtA	antibiotic target protection	lincosamide antibiotic, macrolide antibiotic, orthosomycin antibiotic	32
					macrolide-lincosamide-streptogramin__ere(A)	antibiotic inactivation	macrolide antibiotic	96
					macrolide-lincosamide-streptogramin__ere(B)	antibiotic inactivation	macrolide antibiotic	17
					macrolide-lincosamide-streptogramin__ere(D)	antibiotic inactivation	macrolide antibiotic	70
					macrolide-lincosamide-streptogramin__erm(30)	antibiotic target protection	lincosamide antibiotic, macrolide antibiotic, streptogramin antibiotic	7
					macrolide-lincosamide-streptogramin__ereA2	antibiotic inactivation	macrolide antibiotic	13
					macrolide-lincosamide-streptogramin__erm(31)	antibiotic target protection	lincosamide antibiotic, macrolide antibiotic, streptogramin antibiotic	68
					macrolide-lincosamide-streptogramin__erm(32)	antibiotic target protection	lincosamide antibiotic, macrolide antibiotic, streptogramin antibiotic	3
					macrolide-lincosamide-streptogramin__erm(33)	antibiotic target protection	lincosamide antibiotic, macrolide antibiotic, streptogramin antibiotic	36
					macrolide-lincosamide-streptogramin__erm(35)	antibiotic target protection	lincosamide antibiotic, macrolide antibiotic, streptogramin antibiotic	37
					macrolide-lincosamide-streptogramin__erm(34)	antibiotic target protection	lincosamide antibiotic, macrolide antibiotic, streptogramin antibiotic	9
					macrolide-lincosamide-streptogramin__erm(36)	antibiotic target protection	lincosamide antibiotic, macrolide antibiotic, streptogramin antibiotic	35
					macrolide-lincosamide-streptogramin__erm(37)	antibiotic target protection	lincosamide antibiotic, macrolide antibiotic, streptogramin antibiotic	273
					macrolide-lincosamide-streptogramin__erm(38)	antibiotic target protection	lincosamide antibiotic, macrolide antibiotic, streptogramin antibiotic	217
					macrolide-lincosamide-streptogramin__erm(39)	antibiotic target protection	lincosamide antibiotic, macrolide antibiotic, streptogramin antibiotic	228
					macrolide-lincosamide-streptogramin__erm(40)	antibiotic target protection	lincosamide antibiotic, macrolide antibiotic, streptogramin antibiotic	162
					macrolide-lincosamide-streptogramin__erm(41)	antibiotic target protection	lincosamide antibiotic, macrolide antibiotic, streptogramin antibiotic	71
					macrolide-lincosamide-streptogramin__erm(42)	antibiotic target protection	lincosamide antibiotic, macrolide antibiotic, streptogramin antibiotic	34
					macrolide-lincosamide-streptogramin__erm(43)	antibiotic target protection	lincosamide antibiotic, macrolide antibiotic, streptogramin antibiotic	1
					macrolide-lincosamide-streptogramin__erm(45)	antibiotic target protection	lincosamide antibiotic, macrolide antibiotic, streptogramin antibiotic	7
					macrolide-lincosamide-streptogramin__erm(46)	antibiotic target protection	lincosamide antibiotic, macrolide antibiotic, streptogramin antibiotic	102
					macrolide-lincosamide-streptogramin__erm(47)	antibiotic target protection	lincosamide antibiotic, macrolide antibiotic, streptogramin antibiotic	29
					macrolide-lincosamide-streptogramin__erm(48)	antibiotic target protection	lincosamide antibiotic, macrolide antibiotic, streptogramin antibiotic	1
					macrolide-lincosamide-streptogramin__erm(49)	antibiotic target protection	lincosamide antibiotic, macrolide antibiotic, streptogramin antibiotic	3
					macrolide-lincosamide-streptogramin__erm(50)	antibiotic target protection	lincosamide antibiotic, macrolide antibiotic, streptogramin antibiotic	94
					macrolide-lincosamide-streptogramin__erm(A)	antibiotic target protection	lincosamide antibiotic, macrolide antibiotic, streptogramin antibiotic	72
					macrolide-lincosamide-streptogramin__erm(B)	antibiotic target protection	lincosamide antibiotic, macrolide antibiotic, streptogramin antibiotic	90
					macrolide-lincosamide-streptogramin__erm(C)	antibiotic target protection	lincosamide antibiotic, macrolide antibiotic, streptogramin antibiotic	78
					macrolide-lincosamide-streptogramin__erm(D)	antibiotic target protection	lincosamide antibiotic, macrolide antibiotic, streptogramin antibiotic	32
					macrolide-lincosamide-streptogramin__erm(E)	antibiotic target protection	lincosamide antibiotic, macrolide antibiotic, streptogramin antibiotic	180
					macrolide-lincosamide-streptogramin__erm(F)	antibiotic target protection	lincosamide antibiotic, macrolide antibiotic, streptogramin antibiotic	88
					macrolide-lincosamide-streptogramin__erm(G)	antibiotic target protection	lincosamide antibiotic, macrolide antibiotic, streptogramin antibiotic	72
					macrolide-lincosamide-streptogramin__erm(K)	antibiotic target protection	lincosamide antibiotic, macrolide antibiotic, streptogramin antibiotic	7
					macrolide-lincosamide-streptogramin__erm(H)	antibiotic target protection	lincosamide antibiotic, macrolide antibiotic, streptogramin antibiotic	5
					macrolide-lincosamide-streptogramin__erm(O)	antibiotic target protection	lincosamide antibiotic, macrolide antibiotic, streptogramin antibiotic	209
					macrolide-lincosamide-streptogramin__erm(O)-lrm	antibiotic target protection	lincosamide antibiotic, macrolide antibiotic, streptogramin antibiotic	38
					macrolide-lincosamide-streptogramin__erm(Q)	antibiotic target protection	lincosamide antibiotic, macrolide antibiotic, streptogramin antibiotic	50
					macrolide-lincosamide-streptogramin__erm(R)	antibiotic target protection	lincosamide antibiotic, macrolide antibiotic, streptogramin antibiotic	8
					macrolide-lincosamide-streptogramin__erm(S)	antibiotic target protection	lincosamide antibiotic, macrolide antibiotic, streptogramin antibiotic	57
					macrolide-lincosamide-streptogramin__erm(T)	antibiotic target protection	lincosamide antibiotic, macrolide antibiotic, streptogramin antibiotic	59
					macrolide-lincosamide-streptogramin__erm(V)	antibiotic target protection	lincosamide antibiotic, macrolide antibiotic, streptogramin antibiotic	164
					macrolide-lincosamide-streptogramin__erm(W)	antibiotic target protection	lincosamide antibiotic, macrolide antibiotic, streptogramin antibiotic	45
					macrolide-lincosamide-streptogramin__erm(X)	antibiotic target protection	lincosamide antibiotic, macrolide antibiotic, streptogramin antibiotic	71
					macrolide-lincosamide-streptogramin__erm(Z)	antibiotic target protection	lincosamide antibiotic, macrolide antibiotic, streptogramin antibiotic	8
					macrolide-lincosamide-streptogramin__erm(Y)	antibiotic target protection	lincosamide antibiotic, macrolide antibiotic, streptogramin antibiotic	41
					macrolide-lincosamide-streptogramin__gimA	antibiotic inactivation	macrolide antibiotic	524
					macrolide-lincosamide-streptogramin__lin	antibiotic inactivation	lincosamide antibiotic	1
					macrolide-lincosamide-streptogramin__linG	antibiotic inactivation	lincosamide antibiotic	138
					macrolide-lincosamide-streptogramin__lmrB	antibiotic efflux	lincosamide antibiotic, nucleoside antibiotic	250
					macrolide-lincosamide-streptogramin__lmrC	antibiotic target protection	lincosamide antibiotic	638
					macrolide-lincosamide-streptogramin__lmrD	antibiotic efflux	lincosamide antibiotic	46
					macrolide-lincosamide-streptogramin__lnu(A)	antibiotic inactivation	lincosamide antibiotic	43
					macrolide-lincosamide-streptogramin__lnu(B)	antibiotic inactivation	lincosamide antibiotic	70
					macrolide-lincosamide-streptogramin__lnu(C)	antibiotic inactivation	lincosamide antibiotic	50
					macrolide-lincosamide-streptogramin__lnu(D)	antibiotic inactivation	lincosamide antibiotic	68
					macrolide-lincosamide-streptogramin__lnu(E)	antibiotic inactivation	lincosamide antibiotic	9
					macrolide-lincosamide-streptogramin__lnu(F)	antibiotic inactivation	lincosamide antibiotic	109
					macrolide-lincosamide-streptogramin__lnu(G)	antibiotic inactivation	lincosamide antibiotic	90
					macrolide-lincosamide-streptogramin__lnu(H)	antibiotic inactivation	lincosamide antibiotic	126
					macrolide-lincosamide-streptogramin__lnu(P)	antibiotic inactivation	lincosamide antibiotic	60
					macrolide-lincosamide-streptogramin__lsa(A)	antibiotic target protection	lincosamide antibiotic, pleuromutilin antibiotic, streptogramin antibiotic	20
					macrolide-lincosamide-streptogramin__lsa(B)	antibiotic target protection	lincosamide antibiotic, pleuromutilin antibiotic, streptogramin antibiotic	385
					macrolide-lincosamide-streptogramin__lsa(C)	antibiotic target protection	lincosamide antibiotic, pleuromutilin antibiotic, streptogramin antibiotic	5
					macrolide-lincosamide-streptogramin__lsa(D)	antibiotic target protection	lincosamide antibiotic, pleuromutilin antibiotic, streptogramin antibiotic	13
					macrolide-lincosamide-streptogramin__lsa(E)	antibiotic target protection	lincosamide antibiotic, pleuromutilin antibiotic, streptogramin antibiotic	77
					macrolide-lincosamide-streptogramin__macA	antibiotic efflux	macrolide antibiotic	863
					macrolide-lincosamide-streptogramin__macB	antibiotic efflux	macrolide antibiotic	977
					macrolide-lincosamide-streptogramin__mef(B)	antibiotic efflux	macrolide antibiotic	65
					macrolide-lincosamide-streptogramin__mef(C)	antibiotic efflux	macrolide antibiotic	74
					macrolide-lincosamide-streptogramin__mef(D)	antibiotic efflux	macrolide antibiotic	38
					macrolide-lincosamide-streptogramin__mef(En2)	antibiotic efflux	macrolide antibiotic	35
					macrolide-lincosamide-streptogramin__mef(E)	antibiotic efflux	macrolide antibiotic	5
					macrolide-lincosamide-streptogramin__mel	antibiotic target protection	macrolide antibiotic, streptogramin antibiotic	222
					macrolide-lincosamide-streptogramin__mgtA	antibiotic inactivation	macrolide antibiotic	474
					macrolide-lincosamide-streptogramin__mph(A)	antibiotic inactivation	macrolide antibiotic	56
					macrolide-lincosamide-streptogramin__mph(B)	antibiotic inactivation	macrolide antibiotic	139
					macrolide-lincosamide-streptogramin__mph(C)	antibiotic inactivation	macrolide antibiotic	12
					macrolide-lincosamide-streptogramin__mph(F)	antibiotic inactivation	macrolide antibiotic	29
					macrolide-lincosamide-streptogramin__mph(G)	antibiotic inactivation	macrolide antibiotic	70
					macrolide-lincosamide-streptogramin__mph(I)	antibiotic inactivation	macrolide antibiotic	15
					macrolide-lincosamide-streptogramin__mph(J)	antibiotic inactivation	macrolide antibiotic	8
					macrolide-lincosamide-streptogramin__mph(H)	antibiotic inactivation	macrolide antibiotic	17
					macrolide-lincosamide-streptogramin__mph(K)	antibiotic inactivation	macrolide antibiotic	9
					macrolide-lincosamide-streptogramin__mph(L)	antibiotic inactivation	macrolide antibiotic	57
					macrolide-lincosamide-streptogramin__mph(M)	antibiotic inactivation	macrolide antibiotic	23
					macrolide-lincosamide-streptogramin__mph(N)	antibiotic inactivation	macrolide antibiotic	42
					macrolide-lincosamide-streptogramin__mph(O)	antibiotic inactivation	macrolide antibiotic	16
					macrolide-lincosamide-streptogramin__msr(A)	antibiotic target protection	macrolide antibiotic, streptogramin antibiotic	15
					macrolide-lincosamide-streptogramin__msr(C)	antibiotic target protection	macrolide antibiotic, streptogramin antibiotic	23
					macrolide-lincosamide-streptogramin__msr(F)	antibiotic target protection	macrolide antibiotic, streptogramin antibiotic	60
					macrolide-lincosamide-streptogramin__msr(H)	antibiotic target protection	macrolide antibiotic, streptogramin antibiotic	18
					macrolide-lincosamide-streptogramin__myrA	antibiotic target protection	lincosamide antibiotic, macrolide antibiotic	287
					macrolide-lincosamide-streptogramin__ole(B)	antibiotic target protection	macrolide antibiotic	199
					macrolide-lincosamide-streptogramin__ole(C)	antibiotic target protection	macrolide antibiotic	898
					macrolide-lincosamide-streptogramin__oleD	antibiotic efflux	macrolide antibiotic	507
					macrolide-lincosamide-streptogramin__oleI	antibiotic inactivation	macrolide antibiotic	6
					macrolide-lincosamide-streptogramin__optrA	antibiotic target protection	oxazolidinone antibiotic, phenicol antibiotic	65
					macrolide-lincosamide-streptogramin__poxtA	antibiotic target protection	oxazolidinone antibiotic, phenicol antibiotic, tetracycline antibiotic	33
					macrolide-lincosamide-streptogramin__salC	antibiotic target protection	lincosamide antibiotic, pleuromutilin antibiotic, streptogramin antibiotic	2
					macrolide-lincosamide-streptogramin__sal(A)	antibiotic target protection	lincosamide antibiotic, pleuromutilin antibiotic, streptogramin antibiotic	11
					macrolide-lincosamide-streptogramin__salB	antibiotic target protection	lincosamide antibiotic, pleuromutilin antibiotic, streptogramin antibiotic	6
					macrolide-lincosamide-streptogramin__srm(B)	antibiotic target protection	macrolide antibiotic	215
					macrolide-lincosamide-streptogramin__tlr(C)	antibiotic target protection	lincosamide antibiotic, macrolide antibiotic	282
					macrolide-lincosamide-streptogramin__vat(A)	antibiotic inactivation	streptogramin antibiotic	35
					macrolide-lincosamide-streptogramin__vat(B)	antibiotic inactivation	streptogramin antibiotic	232
					macrolide-lincosamide-streptogramin__vat(C)	antibiotic inactivation	streptogramin antibiotic	21
					macrolide-lincosamide-streptogramin__vat(D)	antibiotic inactivation	streptogramin antibiotic	13
					macrolide-lincosamide-streptogramin__vat(E)	antibiotic inactivation	streptogramin antibiotic	25
					macrolide-lincosamide-streptogramin__vat(F)	antibiotic inactivation	streptogramin antibiotic	735
					macrolide-lincosamide-streptogramin__vat(H)	antibiotic inactivation	streptogramin antibiotic	206
					macrolide-lincosamide-streptogramin__vga(A)	antibiotic target protection	pleuromutilin antibiotic, streptogramin antibiotic	74
					macrolide-lincosamide-streptogramin__vga(B)	antibiotic target protection	pleuromutilin antibiotic, streptogramin antibiotic	24
					macrolide-lincosamide-streptogramin__vga(C)	antibiotic target protection	pleuromutilin antibiotic, streptogramin antibiotic	39
					macrolide-lincosamide-streptogramin__vga(D)	antibiotic target protection	pleuromutilin antibiotic, streptogramin antibiotic	48
					macrolide-lincosamide-streptogramin__vga(E)	antibiotic target protection	pleuromutilin antibiotic, streptogramin antibiotic	29
					macrolide-lincosamide-streptogramin__vga(E) Staphylococcus cohnii	antibiotic target protection	pleuromutilin antibiotic, streptogramin antibiotic	47
					macrolide-lincosamide-streptogramin__vgb(A)	antibiotic inactivation	streptogramin antibiotic	11
					macrolide-lincosamide-streptogramin__vgb(B)	antibiotic inactivation	streptogramin antibiotic	2
					macrolide-lincosamide-streptogramin__vgaALC	antibiotic target protection	pleuromutilin antibiotic, streptogramin antibiotic	9
					macrolide-lincosamide-streptogramin__vmlR	antibiotic target protection	lincosamide antibiotic, nucleoside antibiotic, pleuromutilin antibiotic, streptogramin antibiotic	250
					multidrug__Acinetobacter baumannii AmvA	antibiotic efflux	disinfecting agents and antiseptics, macrolide antibiotic	48
					multidrug__Enterobacter cloacae acrA	antibiotic efflux	cephalosporin, disinfecting agents and antiseptics, fluoroquinolone antibiotic, glycylcycline, rifamycin antibiotic, penam, phenicol antibiotic, tetracycline antibiotic	237
					multidrug__Escherichia coli acrA	antibiotic efflux	cephalosporin, disinfecting agents and antiseptics, fluoroquinolone antibiotic, glycylcycline, penam, phenicol antibiotic, rifamycin antibiotic, tetracycline antibiotic	258
					multidrug__Escherichia coli emrE	antibiotic efflux	macrolide antibiotic	35
					multidrug__Escherichia coli mdfA	antibiotic efflux	disinfecting agents and antiseptics, tetracycline antibiotic	172
					multidrug__Klebsiella pneumoniae acrA	antibiotic efflux	cephalosporin, disinfecting agents and antiseptics, fluoroquinolone antibiotic, glycylcycline, penam, phenicol antibiotic, rifamycin antibiotic, tetracycline antibiotic	260
					multidrug__Klebsiella pneumoniae KpnH	antibiotic efflux	aminoglycoside antibiotic, carbapenem, cephalosporin, fluoroquinolone antibiotic, macrolide antibiotic, penam, penem, peptide antibiotic	2
					multidrug__MexA	antibiotic efflux	aminocoumarin antibiotic, carbapenem, cephalosporin, cephamycin, diaminopyrimidine antibiotic, fluoroquinolone antibiotic, macrolide antibiotic, monobactam, penam, penem, peptide antibiotic, phenicol antibiotic, sulfonamide antibiotic, tetracycline antibiotic	570
					multidrug__MexB	antibiotic efflux	aminocoumarin antibiotic, carbapenem, cephalosporin, cephamycin, diaminopyrimidine antibiotic, fluoroquinolone antibiotic, macrolide antibiotic, monobactam, penam, penem, peptide antibiotic, phenicol antibiotic, sulfonamide antibiotic, tetracycline antibiotic	985
					multidrug__MexC	antibiotic efflux	aminocoumarin antibiotic, aminoglycoside antibiotic, cephalosporin, diaminopyrimidine antibiotic, fluoroquinolone antibiotic, macrolide antibiotic, penam, phenicol antibiotic, tetracycline antibiotic	578
					multidrug__MexD	antibiotic efflux	aminocoumarin antibiotic, aminoglycoside antibiotic, cephalosporin, diaminopyrimidine antibiotic, fluoroquinolone antibiotic, macrolide antibiotic, penam, phenicol antibiotic, tetracycline antibiotic	952
					multidrug__MexE	antibiotic efflux	diaminopyrimidine antibiotic, fluoroquinolone antibiotic, phenicol antibiotic	761
					multidrug__MexF	antibiotic efflux	diaminopyrimidine antibiotic, fluoroquinolone antibiotic, phenicol antibiotic	985
					multidrug__MuxA	antibiotic efflux	aminocoumarin antibiotic, macrolide antibiotic, monobactam, tetracycline antibiotic	228
					multidrug__MuxB	antibiotic efflux	aminocoumarin antibiotic, macrolide antibiotic, monobactam, tetracycline antibiotic	985
					multidrug__MuxC	antibiotic efflux	aminocoumarin antibiotic, macrolide antibiotic, monobactam, tetracycline antibiotic	985
					multidrug__OpmB	antibiotic efflux	aminocoumarin antibiotic, macrolide antibiotic, monobactam, tetracycline antibiotic	281
					multidrug__OpmH	antibiotic efflux	disinfecting agents and antiseptics	455
					multidrug__OprJ	antibiotic efflux	aminocoumarin antibiotic, aminoglycoside antibiotic, cephalosporin, diaminopyrimidine antibiotic, fluoroquinolone antibiotic, macrolide antibiotic, penam, phenicol antibiotic, tetracycline antibiotic	255
					multidrug__OprM	antibiotic efflux	aminocoumarin antibiotic, aminoglycoside antibiotic, carbapenem, cephalosporin, cephamycin, diaminopyrimidine antibiotic, disinfecting agents and antiseptics, fluoroquinolone antibiotic, macrolide antibiotic, monobactam, penam, penem, peptide antibiotic, phenicol antibiotic, sulfonamide antibiotic, tetracycline antibiotic	759
					multidrug__OprN	antibiotic efflux	diaminopyrimidine antibiotic, fluoroquinolone antibiotic, phenicol antibiotic	560
					multidrug__OprZ	antibiotic efflux	aminoglycoside antibiotic, cephalosporin, fluoroquinolone antibiotic, macrolide antibiotic	79
					multidrug__Other_major_facilitator_superfamily_transporter	antibiotic efflux	other	492
					multidrug__ParS	antibiotic efflux, reduced permeability to antibiotic	aminoglycoside antibiotic, carbapenem, cephalosporin, cephamycin, disinfecting agents and antiseptics, fluoroquinolone antibiotic, macrolide antibiotic, monobactam, penam, penem, phenicol antibiotic, tetracycline antibiotic	40
					multidrug__PmpM	antibiotic efflux	aminoglycoside antibiotic, disinfecting agents and antiseptics, fluoroquinolone antibiotic	393
					multidrug__Pseudomonas aeruginosa emrE	antibiotic efflux	aminoglycoside antibiotic	3
					multidrug__RanA	antibiotic efflux	aminoglycoside antibiotic	904
					multidrug__RanB	antibiotic efflux	aminoglycoside antibiotic	349
					multidrug__Staphylococcys aureus LmrS	antibiotic efflux	aminoglycoside antibiotic, diaminopyrimidine antibiotic, macrolide antibiotic, oxazolidinone antibiotic, phenicol antibiotic	16
					multidrug__abcA	antibiotic efflux	cephalosporin, penam, peptide antibiotic	654
					multidrug__abeM	antibiotic efflux	disinfecting agents and antiseptics, fluoroquinolone antibiotic	112
					multidrug__abeS	antibiotic efflux	aminocoumarin antibiotic, macrolide antibiotic	44
					multidrug__acrE	antibiotic efflux	cephalosporin, cephamycin, fluoroquinolone antibiotic, penam	246
					multidrug__acrF	antibiotic efflux	cephalosporin, cephamycin, fluoroquinolone antibiotic, penam	974
					multidrug__adeF	antibiotic efflux	fluoroquinolone antibiotic, tetracycline antibiotic	981
					multidrug__adeH	antibiotic efflux	fluoroquinolone antibiotic, tetracycline antibiotic	234
					multidrug__adeI	antibiotic efflux	carbapenem, cephalosporin, diaminopyrimidine antibiotic, fluoroquinolone antibiotic, lincosamide antibiotic, macrolide antibiotic, penem, phenicol antibiotic, rifamycin antibiotic, tetracycline antibiotic	155
					multidrug__amrB	antibiotic efflux	aminoglycoside antibiotic, macrolide antibiotic	944
					multidrug__blt	antibiotic efflux	disinfecting agents and antiseptics, fluoroquinolone antibiotic	217
					multidrug__bmr	antibiotic efflux	disinfecting agents and antiseptics, fluoroquinolone antibiotic, nucleoside antibiotic, phenicol antibiotic	269
					multidrug__bpeE	other	other	62
					multidrug__bpeF	other	other	972
					multidrug__cdeA	antibiotic efflux	disinfecting agents and antiseptics, fluoroquinolone antibiotic	12
					multidrug__ceoA	antibiotic efflux	aminoglycoside antibiotic, fluoroquinolone antibiotic	29
					multidrug__ceoB	antibiotic efflux	aminoglycoside antibiotic, fluoroquinolone antibiotic	981
					multidrug__efmA	antibiotic efflux	fluoroquinolone antibiotic, macrolide antibiotic	15
					multidrug__efpA	antibiotic efflux	isoniazid-like antibiotic, rifamycin antibiotic	930
					multidrug__efrA	antibiotic efflux	fluoroquinolone antibiotic, macrolide antibiotic, rifamycin antibiotic	381
					multidrug__efrB	antibiotic efflux	fluoroquinolone antibiotic, macrolide antibiotic, rifamycin antibiotic	758
					multidrug__emeA	antibiotic efflux	disinfecting agents and antiseptics	34
					multidrug__emrA	antibiotic efflux	fluoroquinolone antibiotic	776
					multidrug__emrB	antibiotic efflux	fluoroquinolone antibiotic	816
					multidrug__emrD	antibiotic efflux	disinfecting agents and antiseptics, phenicol antibiotic	188
					multidrug__emrK	antibiotic efflux	tetracycline antibiotic	419
					multidrug__emrY	antibiotic efflux	tetracycline antibiotic	45
					multidrug__fexB	antibiotic efflux	phenicol antibiotic	15
					multidrug__lmrP	antibiotic efflux	lincosamide antibiotic, macrolide antibiotic, streptogramin antibiotic, tetracycline antibiotic	14
					multidrug__hp1181	antibiotic efflux	fluoroquinolone antibiotic, nitroimidazole antibiotic, tetracycline antibiotic	1
					multidrug__mdsA	antibiotic efflux	carbapenem, cephalosporin, cephamycin, monobactam, penam, penem, phenicol antibiotic	31
					multidrug__mdeA	antibiotic efflux	aminoglycoside antibiotic, disinfecting agents and antiseptics, fluoroquinolone antibiotic, penam, tetracycline antibiotic	1
					multidrug__mdsB	antibiotic efflux	carbapenem, cephalosporin, cephamycin, monobactam, penam, penem, phenicol antibiotic	968
					multidrug__mdsC	antibiotic efflux	carbapenem, cephalosporin, cephamycin, monobactam, penam, penem, phenicol antibiotic	144
					multidrug__mdtE	antibiotic efflux	fluoroquinolone antibiotic, macrolide antibiotic, penam	247
					multidrug__mdtF	antibiotic efflux	fluoroquinolone antibiotic, macrolide antibiotic, penam	905
					multidrug__mdtH	antibiotic efflux	fluoroquinolone antibiotic	191
					multidrug__mdtK	antibiotic efflux	fluoroquinolone antibiotic	288
					multidrug__mdtL	other	other	134
					multidrug__mdtM	antibiotic efflux	disinfecting agents and antiseptics, fluoroquinolone antibiotic, lincosamide antibiotic, nucleoside antibiotic, phenicol antibiotic	55
					multidrug__mdtN	antibiotic efflux	disinfecting agents and antiseptics, nucleoside antibiotic	143
					multidrug__mdtO	antibiotic efflux	disinfecting agents and antiseptics, nucleoside antibiotic	48
					multidrug__mdtP	antibiotic efflux	disinfecting agents and antiseptics, nucleoside antibiotic	55
					multidrug__mefF	antibiotic efflux	macrolide antibiotic	58
					multidrug__mefJ	antibiotic efflux	macrolide antibiotic	36
					multidrug__mepA	antibiotic efflux	glycylcycline, tetracycline antibiotic	43
					multidrug__mexG	antibiotic efflux	disinfecting agents and antiseptics, fluoroquinolone antibiotic, tetracycline antibiotic	56
					multidrug__mexH	antibiotic efflux	disinfecting agents and antiseptics, fluoroquinolone antibiotic, tetracycline antibiotic	17
					multidrug__mexJ	antibiotic efflux	disinfecting agents and antiseptics, macrolide antibiotic, tetracycline antibiotic	289
					multidrug__mexK	antibiotic efflux	disinfecting agents and antiseptics, macrolide antibiotic, tetracycline antibiotic	983
					multidrug__mexM	antibiotic efflux	phenicol antibiotic	6
					multidrug__mexN	antibiotic efflux	phenicol antibiotic	969
					multidrug__mexP	antibiotic efflux	carbapenem, diaminopyrimidine antibiotic, disinfecting agents and antiseptics, macrolide antibiotic, phenicol antibiotic, tetracycline antibiotic	69
					multidrug__mexQ	antibiotic efflux	carbapenem, diaminopyrimidine antibiotic, disinfecting agents and antiseptics, macrolide antibiotic, phenicol antibiotic, tetracycline antibiotic	972
					multidrug__mexV	antibiotic efflux	aminoglycoside antibiotic, carbapenem, cephalosporin, cephamycin, disinfecting agents and antiseptics, macrolide antibiotic, fluoroquinolone antibiotic, penam, phenicol antibiotic, tetracycline antibiotic	50
					multidrug__mexW	antibiotic efflux	disinfecting agents and antiseptics, fluoroquinolone antibiotic, macrolide antibiotic, phenicol antibiotic, tetracycline antibiotic	984
					multidrug__msbA	antibiotic efflux	nitroimidazole antibiotic	971
					multidrug__mtrC	antibiotic efflux	macrolide antibiotic, penam	4
					multidrug__mtrD	antibiotic efflux	macrolide antibiotic, penam	774
					multidrug__mtrE	antibiotic efflux	macrolide antibiotic, penam	83
					multidrug__opcM	antibiotic efflux	aminoglycoside antibiotic, fluoroquinolone antibiotic	293
					multidrug__opmD	antibiotic efflux	disinfecting agents and antiseptics, fluoroquinolone antibiotic, tetracycline antibiotic	37
					multidrug__opmE	antibiotic efflux	carbapenem, diaminopyrimidine antibiotic, disinfecting agents and antiseptics, macrolide antibiotic, phenicol antibiotic, tetracycline antibiotic	72
					multidrug__oprA	antibiotic efflux	aminoglycoside antibiotic, carbapenem, fluoroquinolone antibiotic, macrolide antibiotic, tetracycline antibiotic	464
					multidrug__oprC	antibiotic efflux	other	979
					multidrug__oqxA	antibiotic efflux	diaminopyrimidine antibiotic, fluoroquinolone antibiotic, glycylcycline, nitrofuran antibiotic, tetracycline antibiotic	294
					multidrug__oqxB	antibiotic efflux	diaminopyrimidine antibiotic, fluoroquinolone antibiotic, glycylcycline, nitrofuran antibiotic, tetracycline antibiotic	984
					multidrug__patA	antibiotic efflux	fluoroquinolone antibiotic	30
					multidrug__patB	antibiotic efflux	fluoroquinolone antibiotic	39
					multidrug__pmrA	antibiotic efflux	fluoroquinolone antibiotic	87
					multidrug__qacA	antibiotic efflux	fluoroquinolone antibiotic	2
					multidrug__qacB	antibiotic efflux	fluoroquinolone antibiotic	11
					multidrug__qacE	antibiotic efflux	disinfecting agents and antiseptics	165
					multidrug__qacEdelta1	antibiotic efflux	disinfecting agents and antiseptics	217
					multidrug__qacG	antibiotic efflux	disinfecting agents and antiseptics	3
					multidrug__qacH	antibiotic efflux	disinfecting agents and antiseptics	250
					multidrug__qacJ	antibiotic efflux	disinfecting agents and antiseptics	1
					multidrug__salD	antibiotic target protection	lincosamide antibiotic, pleuromutilin antibiotic, streptogramin antibiotic	2
					multidrug__sdeY	other	other	954
					multidrug__smeA	antibiotic efflux	aminoglycoside antibiotic, cephalosporin, cephamycin, penam	16
					multidrug__smeD	antibiotic efflux	fluoroquinolone antibiotic, macrolide antibiotic, phenicol antibiotic, tetracycline antibiotic	601
					multidrug__smeE	antibiotic efflux	fluoroquinolone antibiotic, macrolide antibiotic, phenicol antibiotic, tetracycline antibiotic	980
					multidrug__smeF	antibiotic efflux	fluoroquinolone antibiotic, macrolide antibiotic, phenicol antibiotic, tetracycline antibiotic	382
					multidrug__tap	antibiotic efflux	tetracycline antibiotic	893
					multidrug__tolC	antibiotic efflux	aminocoumarin antibiotic, aminoglycoside antibiotic, carbapenem, cephalosporin, cephamycin, disinfecting agents and antiseptics, fluoroquinolone antibiotic, glycylcycline, macrolide antibiotic, penam, penem, peptide antibiotic, phenicol antibiotic, rifamycin antibiotic, tetracycline antibiotic	488
					multidrug__ykkC	antibiotic efflux	aminoglycoside antibiotic, phenicol antibiotic, tetracycline antibiotic	33
					multidrug__ykkD	antibiotic efflux	aminoglycoside antibiotic, phenicol antibiotic, tetracycline antibiotic	41
					mupirocin__Bifidobacteria intrinsic ileS conferring resistance to mupirocin	antibiotic target alteration	mupirocin-like antibiotic	973
					mupirocin__mupA	antibiotic target alteration	mupirocin-like antibiotic	484
					mupirocin__mupB	antibiotic target alteration	mupirocin-like antibiotic	673
					novobiocin__novA	antibiotic efflux	aminocoumarin antibiotic	983
					other_peptide_antibiotics__ArnT	antibiotic target alteration	peptide antibiotic	107
					other_peptide_antibiotics__microcin efflux pumu gene yojI	antibiotic efflux	peptide antibiotic	210
					other_peptide_antibiotics__thiostrepton resistance gene tsnR	antibiotic target protection	peptide antibiotic	210
					other_peptide_antibiotics__viomycin phosphotransferase	antibiotic inactivation	peptide antibiotic	71
					pleuromutilin_tiamulin__TaeA	antibiotic efflux	pleuromutilin antibiotic	839
					pleuromutilin_tiamulin__msr(G)	antibiotic target protection	macrolide antibiotic, streptogramin antibiotic	189
					pleuromutilin_tiamulin__msr(I)	antibiotic target protection	macrolide antibiotic, phosphonic acid antibiotic, streptogramin antibiotic	67
					polymyxin__ICR-Mc	antibiotic target alteration	peptide antibiotic	17
					pleuromutilin_tiamulin__salE	antibiotic target protection	lincosamide antibiotic, pleuromutilin antibiotic, streptogramin antibiotic	1
					polymyxin__ICR-Mo	antibiotic target alteration	peptide antibiotic	46
					polymyxin__arnA	antibiotic target alteration	peptide antibiotic	893
					polymyxin__eptA	antibiotic target alteration	peptide antibiotic	159
					polymyxin__mcr-1.1	antibiotic target alteration	peptide antibiotic	3
					polymyxin__mcr-1.10	antibiotic target alteration	peptide antibiotic	11
					polymyxin__mcr-1.6	antibiotic target alteration	peptide antibiotic	6
					polymyxin__mcr-1.7	antibiotic target alteration	peptide antibiotic	6
					polymyxin__mcr-1.8	antibiotic target alteration	peptide antibiotic	8
					polymyxin__mcr-1.9	antibiotic target alteration	peptide antibiotic	7
					polymyxin__mcr-1.11	antibiotic target alteration	peptide antibiotic	6
					polymyxin__mcr-1.12	antibiotic target alteration	peptide antibiotic	3
					polymyxin__mcr-1.13	antibiotic target alteration	peptide antibiotic	3
					polymyxin__mcr-1.2	antibiotic target alteration	peptide antibiotic	4
					polymyxin__mcr-1.3	antibiotic target alteration	peptide antibiotic	3
					polymyxin__mcr-1.4	antibiotic target alteration	peptide antibiotic	8
					polymyxin__mcr-1.5	antibiotic target alteration	peptide antibiotic	6
					polymyxin__mcr-10.1	antibiotic target alteration	peptide antibiotic	29
					polymyxin__mcr-2.2	antibiotic target alteration	peptide antibiotic	6
					polymyxin__mcr-3.1	antibiotic target alteration	peptide antibiotic	5
					polymyxin__mcr-3.12	antibiotic target alteration	peptide antibiotic	2
					polymyxin__mcr-3.3	antibiotic target alteration	peptide antibiotic	6
					polymyxin__mcr-3.5	antibiotic target alteration	peptide antibiotic	32
					polymyxin__mcr-3.6	antibiotic target alteration	peptide antibiotic	1
					polymyxin__mcr-3.7	antibiotic target alteration	peptide antibiotic	3
					polymyxin__mcr-3.9	antibiotic target alteration	peptide antibiotic	4
					polymyxin__mcr-3.10	antibiotic target alteration	peptide antibiotic	1
					polymyxin__mcr-3.8	antibiotic target alteration	peptide antibiotic	4
					polymyxin__mcr-4.1	antibiotic target alteration	peptide antibiotic	11
					polymyxin__mcr-4.2	antibiotic target alteration	peptide antibiotic	2
					polymyxin__mcr-4.3	antibiotic target alteration	peptide antibiotic	6
					polymyxin__mcr-4.4	antibiotic target alteration	peptide antibiotic	33
					polymyxin__mcr-4.5	antibiotic target alteration	peptide antibiotic	22
					polymyxin__mcr-5.1	antibiotic target alteration	peptide antibiotic	126
					polymyxin__mcr-5.2	antibiotic target alteration	peptide antibiotic	177
					polymyxin__mcr-6.1	antibiotic target alteration	peptide antibiotic	3
					polymyxin__mcr-7.1	antibiotic target alteration	peptide antibiotic	21
					polymyxin__mcr-8.1	antibiotic target alteration	peptide antibiotic	51
					polymyxin__mcr-9.1	antibiotic target alteration	peptide antibiotic	43
					polymyxin__pmrF	antibiotic target alteration	peptide antibiotic	299
					polymyxin__rosA	antibiotic efflux	peptide antibiotic	984
					polymyxin__rosB	antibiotic efflux	peptide antibiotic	978
					polymyxin__ugd	antibiotic target alteration	peptide antibiotic	922
					puromycin__puromycin resistance protein	other	other	485
					quinolone__Acinetobacter baumannii AbaQ	antibiotic efflux	fluoroquinolone antibiotic	379
					quinolone__QepA2	antibiotic efflux	fluoroquinolone antibiotic	569
					quinolone__QepA4	antibiotic efflux	fluoroquinolone antibiotic	793
					quinolone__QnrB13	antibiotic target protection	fluoroquinolone antibiotic	1
					quinolone__QnrB2	antibiotic target protection	fluoroquinolone antibiotic	2
					quinolone__QnrB1	antibiotic target protection	fluoroquinolone antibiotic	2
					quinolone__QnrB17	antibiotic target protection	fluoroquinolone antibiotic	3
					quinolone__QnrB20	antibiotic target protection	fluoroquinolone antibiotic	3
					quinolone__QnrB26	antibiotic target protection	fluoroquinolone antibiotic	1
					quinolone__QnrB24	antibiotic target protection	fluoroquinolone antibiotic	1
					quinolone__QnrB27	antibiotic target protection	fluoroquinolone antibiotic	1
					quinolone__QnrB3	antibiotic target protection	fluoroquinolone antibiotic	1
					quinolone__QnrB22	antibiotic target protection	fluoroquinolone antibiotic	1
					quinolone__QnrB30	antibiotic target protection	fluoroquinolone antibiotic	13
					quinolone__QnrB11	antibiotic target protection	fluoroquinolone antibiotic	2
					quinolone__QnrB33	antibiotic target protection	fluoroquinolone antibiotic	2
					quinolone__QnrB4	antibiotic target protection	fluoroquinolone antibiotic	1
					quinolone__QnrB45	antibiotic target protection	fluoroquinolone antibiotic	2
					quinolone__QnrB35	antibiotic target protection	fluoroquinolone antibiotic	1
					quinolone__QnrB42	antibiotic target protection	fluoroquinolone antibiotic	1
					quinolone__QnrB54	antibiotic target protection	fluoroquinolone antibiotic	4
					quinolone__QnrB57	antibiotic target protection	fluoroquinolone antibiotic	1
					quinolone__QnrB64	antibiotic target protection	fluoroquinolone antibiotic	1
					quinolone__QnrB55	antibiotic target protection	fluoroquinolone antibiotic	1
					quinolone__QnrB60	antibiotic target protection	fluoroquinolone antibiotic	1
					quinolone__QnrB67	antibiotic target protection	fluoroquinolone antibiotic	2
					quinolone__QnrB71	antibiotic target protection	fluoroquinolone antibiotic	2
					quinolone__QnrB72	antibiotic target protection	fluoroquinolone antibiotic	1
					quinolone__QnrB8	antibiotic target protection	fluoroquinolone antibiotic	1
					quinolone__QnrB50	antibiotic target protection	fluoroquinolone antibiotic	1
					quinolone__QnrB61	antibiotic target protection	fluoroquinolone antibiotic	1
					quinolone__QnrB66	antibiotic target protection	fluoroquinolone antibiotic	2
					quinolone__QnrD1	antibiotic target protection	fluoroquinolone antibiotic	15
					quinolone__QnrD2	antibiotic target protection	fluoroquinolone antibiotic	7
					quinolone__QnrE1	antibiotic target protection	fluoroquinolone antibiotic	23
					quinolone__QnrE2	antibiotic target protection	fluoroquinolone antibiotic	10
					quinolone__QnrS1	antibiotic target protection	fluoroquinolone antibiotic	4
					quinolone__QnrS10	antibiotic target protection	fluoroquinolone antibiotic	12
					quinolone__QnrS11	antibiotic target protection	fluoroquinolone antibiotic	5
					quinolone__QnrS15	antibiotic target protection	fluoroquinolone antibiotic	9
					quinolone__QnrS2	antibiotic target protection	fluoroquinolone antibiotic	14
					quinolone__QnrS3	antibiotic target protection	fluoroquinolone antibiotic	9
					quinolone__QnrS4	antibiotic target protection	fluoroquinolone antibiotic	6
					quinolone__QnrS5	antibiotic target protection	fluoroquinolone antibiotic	11
					quinolone__QnrS7	antibiotic target protection	fluoroquinolone antibiotic	14
					quinolone__QnrS8	antibiotic target protection	fluoroquinolone antibiotic	15
					quinolone__QnrS6	antibiotic target protection	fluoroquinolone antibiotic	12
					quinolone__QnrS9	antibiotic target protection	fluoroquinolone antibiotic	7
					quinolone__QnrVC1	antibiotic target protection	fluoroquinolone antibiotic	19
					quinolone__QnrVC3	antibiotic target protection	fluoroquinolone antibiotic	18
					quinolone__QnrVC4	antibiotic target protection	fluoroquinolone antibiotic	4
					quinolone__QnrVC5	antibiotic target protection	fluoroquinolone antibiotic	1
					quinolone__QnrB32	antibiotic target protection	fluoroquinolone antibiotic	5
					quinolone__QnrVC6	antibiotic target protection	fluoroquinolone antibiotic	22
					quinolone__QnrVC7	antibiotic target protection	fluoroquinolone antibiotic	2
					quinolone__lfrA	antibiotic efflux	fluoroquinolone antibiotic	690
					quinolone__mfpA	antibiotic target protection	fluoroquinolone antibiotic	378
					quinolone__norA	antibiotic efflux	disinfecting agents and antiseptics, fluoroquinolone antibiotic	26
					quinolone__norB	antibiotic efflux	fluoroquinolone antibiotic	588
					quinolone__qepA	antibiotic efflux	fluoroquinolone antibiotic	876
					quinolone__sdrM	antibiotic efflux	disinfecting agents and antiseptics, fluoroquinolone antibiotic	13
					rifamycin__RbpA	antibiotic target protection	rifamycin antibiotic	896
					rifamycin__arr-1	antibiotic inactivation	rifamycin antibiotic	900
					rifamycin__arr-2	antibiotic inactivation	rifamycin antibiotic	395
					rifamycin__arr-3	antibiotic inactivation	rifamycin antibiotic	588
					rifamycin__arr-4	antibiotic inactivation	rifamycin antibiotic	348
					rifamycin__arr-5	antibiotic inactivation	rifamycin antibiotic	198
					rifamycin__arr-7	antibiotic inactivation	rifamycin antibiotic	26
					rifamycin__arr-8	antibiotic inactivation	rifamycin antibiotic	117
					rifamycin__iri	antibiotic inactivation	rifamycin antibiotic	957
					rifamycin__rgt1438	antibiotic inactivation	rifamycin antibiotic	628
					rifamycin__rphA	antibiotic inactivation	rifamycin antibiotic	981
					rifamycin__rphB	antibiotic inactivation	rifamycin antibiotic	984
					streptothricin__SAT-2	antibiotic inactivation	nucleoside antibiotic	34
					streptothricin__SAT-3	antibiotic inactivation	nucleoside antibiotic	16
					streptothricin__SAT-4	antibiotic inactivation	nucleoside antibiotic	70
					streptothricin__SatA	antibiotic inactivation	nucleoside antibiotic	64
					streptothricin__sta	antibiotic inactivation	nucleoside antibiotic	128
					sulfonamide__sul1	antibiotic target replacement	sulfonamide antibiotic	370
					sulfonamide__sul2	antibiotic target replacement	sulfonamide antibiotic	309
					sulfonamide__sul3	antibiotic target replacement	sulfonamide antibiotic	28
					sulfonamide__sul4	antibiotic target replacement	sulfonamide antibiotic	646
					tetracenomycin_C__tcmA	antibiotic efflux	tetracenomycin antibiotic	844
					tetracycline__Corynebacterium striatum tetA	antibiotic efflux	penam, tetracycline antibiotic	15
					tetracycline__otr(A)	other	tetracycline antibiotic	940
					tetracycline__otr(B)	antibiotic efflux	tetracycline antibiotic	45
					tetracycline__otr(C)	antibiotic efflux	tetracycline antibiotic	691
					tetracycline__tcr3	antibiotic efflux	tetracycline antibiotic	36
					tetracycline__tet(30)	antibiotic efflux	tetracycline antibiotic	252
					tetracycline__tet(31)	antibiotic efflux	tetracycline antibiotic	26
					tetracycline__tet(32)	antibiotic target protection	tetracycline antibiotic	98
					tetracycline__tet(33)	antibiotic efflux	tetracycline antibiotic	133
					tetracycline__tet(34)	antibiotic target alteration, antibiotic inactivation	tetracycline antibiotic	53
					tetracycline__tet(35)	antibiotic efflux	tetracycline antibiotic	156
					tetracycline__tet(36)	antibiotic target protection	tetracycline antibiotic	76
					tetracycline__tet(37)	antibiotic inactivation	tetracycline antibiotic	8
					tetracycline__tet(38)	antibiotic efflux	tetracycline antibiotic	30
					tetracycline__tet(39)	antibiotic efflux	tetracycline antibiotic	94
					tetracycline__tet(40)	antibiotic efflux	tetracycline antibiotic	95
					tetracycline__tet(41)	antibiotic efflux	tetracycline antibiotic	283
					tetracycline__tet(42)	antibiotic efflux	tetracycline antibiotic	410
					tetracycline__tet(43)	antibiotic efflux	tetracycline antibiotic	724
					tetracycline__tet(44)	antibiotic target protection	tetracycline antibiotic	102
					tetracycline__tet(45)	antibiotic efflux	tetracycline antibiotic	45
					tetracycline__tet(47)	antibiotic inactivation	tetracycline antibiotic	293
					tetracycline__tet(48)	antibiotic inactivation	tetracycline antibiotic	45
					tetracycline__tet(49)	antibiotic inactivation	tetracycline antibiotic	207
					tetracycline__tet(50)	antibiotic inactivation	tetracycline antibiotic	136
					tetracycline__tet(51)	antibiotic inactivation	tetracycline antibiotic	120
					tetracycline__tet(52)	antibiotic inactivation	tetracycline antibiotic	57
					tetracycline__tet(53)	antibiotic inactivation	tetracycline antibiotic	136
					tetracycline__tet(54)	antibiotic inactivation	tetracycline antibiotic	141
					tetracycline__tet(55)	antibiotic inactivation	tetracycline antibiotic	105
					tetracycline__tet(56)	antibiotic inactivation	tetracycline antibiotic	336
					tetracycline__tet(57)	antibiotic efflux	tetracycline antibiotic	4
					tetracycline__tet(58)	other	tetracycline antibiotic	15
					tetracycline__tet(59)	antibiotic efflux	tetracycline antibiotic	36
					tetracycline__tet(61)	antibiotic target protection	tetracycline antibiotic	17
					tetracycline__tet(62)	antibiotic efflux	tetracycline antibiotic	31
					tetracycline__tet(A)	antibiotic efflux	tetracycline antibiotic	197
					tetracycline__tet(B)	antibiotic efflux	tetracycline antibiotic	31
					tetracycline__tet(C)	antibiotic efflux	tetracycline antibiotic	248
					tetracycline__tet(D)	antibiotic efflux	tetracycline antibiotic	23
					tetracycline__tet(E)	antibiotic efflux	tetracycline antibiotic	11
					tetracycline__tet(G)	antibiotic efflux	tetracycline antibiotic	198
					tetracycline__tet(H)	antibiotic efflux	tetracycline antibiotic	36
					tetracycline__tet(J)	antibiotic efflux	tetracycline antibiotic	25
					tetracycline__tet(K)	antibiotic efflux	tetracycline antibiotic	24
					tetracycline__tet(L)	antibiotic efflux	tetracycline antibiotic	215
					tetracycline__tet(M)	antibiotic target protection	tetracycline antibiotic	776
					tetracycline__tet(O)	antibiotic target protection	tetracycline antibiotic	462
					tetracycline__tet(O/W)	antibiotic target protection	tetracycline antibiotic	62
					tetracycline__tet(Q)	antibiotic target protection	tetracycline antibiotic	90
					tetracycline__tet(S)	antibiotic target protection	tetracycline antibiotic	92
					tetracycline__tet(T)	antibiotic target protection	tetracycline antibiotic	192
					tetracycline__tet(U)	antibiotic efflux	tetracycline antibiotic	10
					tetracycline__tet(V)	antibiotic efflux	tetracycline antibiotic	897
					tetracycline__tet(W)	antibiotic target protection	tetracycline antibiotic	152
					tetracycline__tet(W/N/W)	antibiotic target protection	tetracycline antibiotic	50
					tetracycline__tet(X)	antibiotic inactivation	tetracycline antibiotic	51
					tetracycline__tet(X3)	antibiotic inactivation	tetracycline antibiotic	186
					tetracycline__tet(X4)	antibiotic inactivation	tetracycline antibiotic	43
					tetracycline__tet(X5)	antibiotic inactivation	tetracycline antibiotic	60
					tetracycline__tet(Y)	antibiotic efflux	tetracycline antibiotic	42
					tetracycline__tet(Z)	antibiotic efflux	tetracycline antibiotic	69
					tetracycline__tetA	antibiotic efflux	tetracycline antibiotic	35
					tetracycline__tetA(46)	antibiotic efflux	tetracycline antibiotic	5
					tetracycline__tetA(48)	other	tetracycline antibiotic	967
					tetracycline__tetA(60)	antibiotic efflux	tetracycline antibiotic	66
					tetracycline__tetA(P)	antibiotic efflux	tetracycline antibiotic	226
					tetracycline__tetB(46)	antibiotic efflux	tetracycline antibiotic	259
					tetracycline__tetB(48)	other	tetracycline antibiotic	788
					tetracycline__tetB(60)	antibiotic efflux	tetracycline antibiotic	180
					tetracycline__tetB(P)	antibiotic target protection	tetracycline antibiotic	509
					tetracycline__tetX1	antibiotic inactivation	tetracycline antibiotic	210
					tetracycline__tetX2	antibiotic inactivation	tetracycline antibiotic	201
					tetracycline__tetX6	antibiotic inactivation	tetracycline antibiotic	74
					trimethoprim__DfrA36	antibiotic target replacement	diaminopyrimidine antibiotic	76
					trimethoprim__DfrA43_TMP	antibiotic target replacement	diaminopyrimidine antibiotic	3
					trimethoprim__DfrA38	antibiotic target replacement	diaminopyrimidine antibiotic	21
					trimethoprim__DfrA39	antibiotic target replacement	diaminopyrimidine antibiotic	4
					trimethoprim__DfrA42_TMP	antibiotic target replacement	diaminopyrimidine antibiotic	14
					trimethoprim__DfrB9	antibiotic target replacement	diaminopyrimidine antibiotic	113
					trimethoprim__dfrA1	antibiotic target replacement	diaminopyrimidine antibiotic	68
					trimethoprim__dfrA10	antibiotic target replacement	diaminopyrimidine antibiotic	3
					trimethoprim__dfrA12	antibiotic target replacement	diaminopyrimidine antibiotic	55
					trimethoprim__dfrA13	antibiotic target replacement	diaminopyrimidine antibiotic	5
					trimethoprim__dfrA15	antibiotic target replacement	diaminopyrimidine antibiotic	31
					trimethoprim__dfrA15b	antibiotic target replacement	diaminopyrimidine antibiotic	2
					trimethoprim__dfrA16	antibiotic target replacement	diaminopyrimidine antibiotic	50
					trimethoprim__dfrA14	antibiotic target replacement	diaminopyrimidine antibiotic	32
					trimethoprim__dfrA17	antibiotic target replacement	diaminopyrimidine antibiotic	33
					trimethoprim__dfrA18	antibiotic target replacement	diaminopyrimidine antibiotic	7
					trimethoprim__dfrA19	antibiotic target replacement	diaminopyrimidine antibiotic	15
					trimethoprim__dfrA20	antibiotic target replacement	diaminopyrimidine antibiotic	31
					trimethoprim__dfrA21	antibiotic target replacement	diaminopyrimidine antibiotic	4
					trimethoprim__dfrA22	antibiotic target replacement	diaminopyrimidine antibiotic	67
					trimethoprim__dfrA24	antibiotic target replacement	diaminopyrimidine antibiotic	1
					trimethoprim__dfrA25	antibiotic target replacement	diaminopyrimidine antibiotic	3
					trimethoprim__dfrA26	antibiotic target replacement	diaminopyrimidine antibiotic	17
					trimethoprim__dfrA27	antibiotic target replacement	diaminopyrimidine antibiotic	27
					trimethoprim__dfrA28	antibiotic target replacement	diaminopyrimidine antibiotic	14
					trimethoprim__dfrA29	antibiotic target replacement	diaminopyrimidine antibiotic	1
					trimethoprim__dfrA3	antibiotic target replacement	diaminopyrimidine antibiotic	207
					trimethoprim__dfrA32	antibiotic target replacement	diaminopyrimidine antibiotic	11
					trimethoprim__dfrA30	antibiotic target replacement	diaminopyrimidine antibiotic	2
					trimethoprim__dfrA35	antibiotic target replacement	diaminopyrimidine antibiotic	13
					trimethoprim__dfrA9	antibiotic target replacement	diaminopyrimidine antibiotic	2
					trimethoprim__dfrA3b	antibiotic target replacement	diaminopyrimidine antibiotic	1
					trimethoprim__dfrA5	antibiotic target replacement	diaminopyrimidine antibiotic	30
					trimethoprim__dfrA6	antibiotic target replacement	diaminopyrimidine antibiotic	1
					trimethoprim__dfrA6 from Proteus mirabilis	antibiotic target replacement	diaminopyrimidine antibiotic	8
					trimethoprim__dfrA7	antibiotic target replacement	diaminopyrimidine antibiotic	7
					trimethoprim__dfrB1	antibiotic target replacement	diaminopyrimidine antibiotic	30
					trimethoprim__dfrB2	antibiotic target replacement	diaminopyrimidine antibiotic	368
					trimethoprim__dfrB3	antibiotic target replacement	diaminopyrimidine antibiotic	227
					trimethoprim__dfrB4	antibiotic target replacement	diaminopyrimidine antibiotic	59
					trimethoprim__dfrB5	antibiotic target replacement	diaminopyrimidine antibiotic	14
					trimethoprim__dfrB6	antibiotic target replacement	diaminopyrimidine antibiotic	203
					trimethoprim__dfrB7	antibiotic target replacement	diaminopyrimidine antibiotic	14
					trimethoprim__dfrC	antibiotic target replacement	diaminopyrimidine antibiotic	19
					trimethoprim__dfrD	antibiotic target replacement	diaminopyrimidine antibiotic	54
					trimethoprim__dfrE	antibiotic target replacement	diaminopyrimidine antibiotic	3
					trimethoprim__dfrF	antibiotic target replacement	diaminopyrimidine antibiotic	22
					trimethoprim__dfrG	antibiotic target replacement	diaminopyrimidine antibiotic	127
					trimethoprim__dfrI	antibiotic target replacement	diaminopyrimidine antibiotic	36
					trimethoprim__dfrK	antibiotic target replacement	diaminopyrimidine antibiotic	38
					tunicamycin__tmrB	reduced permeability to antibiotic	nucleoside antibiotic	17
					vancomycin__vanA	antibiotic target alteration	glycopeptide antibiotic	781
					vancomycin__vanB	antibiotic target alteration	glycopeptide antibiotic	307
					vancomycin__vanC	antibiotic target alteration	glycopeptide antibiotic	75
					vancomycin__vanD	antibiotic target alteration	glycopeptide antibiotic	380
					vancomycin__vanE	antibiotic target alteration	glycopeptide antibiotic	2
					vancomycin__vanF	antibiotic target alteration	glycopeptide antibiotic	604
					vancomycin__vanG	antibiotic target alteration	glycopeptide antibiotic	85
					vancomycin__vanHA	antibiotic target alteration	glycopeptide antibiotic	380
					vancomycin__vanHB	antibiotic target alteration	glycopeptide antibiotic	137
					vancomycin__vanHD	antibiotic target alteration	glycopeptide antibiotic	12
					vancomycin__vanHF	antibiotic target alteration	glycopeptide antibiotic	666
					vancomycin__vanHM	antibiotic target alteration	glycopeptide antibiotic	43
					vancomycin__vanHO	antibiotic target alteration	glycopeptide antibiotic	803
					vancomycin__vanH_in_vanP_cl	antibiotic target alteration	glycopeptide antibiotic	14
					vancomycin__vanI	antibiotic target alteration	glycopeptide antibiotic	833
					vancomycin__vanJ	antibiotic target alteration	glycopeptide antibiotic	558
					vancomycin__vanKI	antibiotic target alteration	glycopeptide antibiotic	52
					vancomycin__vanL	antibiotic target alteration	glycopeptide antibiotic	2
					vancomycin__vanM	antibiotic target alteration	glycopeptide antibiotic	210
					vancomycin__vanN	antibiotic target alteration	glycopeptide antibiotic	2
					vancomycin__vanO	antibiotic target alteration	glycopeptide antibiotic	800
					vancomycin__vanP	antibiotic target alteration	glycopeptide antibiotic	7
					vancomycin__vanTG	antibiotic target alteration	glycopeptide antibiotic	4
					vancomycin__vanTC	antibiotic target alteration	glycopeptide antibiotic	3
					vancomycin__vanTE	antibiotic target alteration	glycopeptide antibiotic	2
					vancomycin__vanUG	antibiotic target alteration	glycopeptide antibiotic	2
					vancomycin__vanXA	antibiotic target alteration	glycopeptide antibiotic	196
					vancomycin__vanXB	antibiotic target alteration	glycopeptide antibiotic	47
					vancomycin__vanXD	antibiotic target alteration	glycopeptide antibiotic	63
					vancomycin__vanXF	antibiotic target alteration	glycopeptide antibiotic	599
					vancomycin__vanXI	antibiotic target alteration	glycopeptide antibiotic	770
					vancomycin__vanXM	antibiotic target alteration	glycopeptide antibiotic	41
					vancomycin__vanXO	antibiotic target alteration	glycopeptide antibiotic	856
					vancomycin__vanYA	antibiotic target alteration	glycopeptide antibiotic	157
					vancomycin__vanYB	antibiotic target alteration	glycopeptide antibiotic	5
					vancomycin__vanYF	antibiotic target alteration	glycopeptide antibiotic	136
					vancomycin__vanYG1	antibiotic target alteration	glycopeptide antibiotic	11
					vancomycin__vanYM	antibiotic target alteration	glycopeptide antibiotic	124
					vancomycin__vanZA	antibiotic target alteration	glycopeptide antibiotic	111
					vancomycin__vanZF	antibiotic target alteration	glycopeptide antibiotic	81
