# Supplementary material for: Global health risk assessment of antibiotic resistance in agricultural soils
Source: Research Square preprint supplement (doi:10.21203/rs.3.rs-7635655/v1), 2025-10-13
Supplement: Supplementary file 10 [file d8ea1e0ce93df3008a10d782.xlsx]

## Sheet: Supplementary Table 3
Supplementary Table 3 ARGs subtypes detected in this study
ARGs Subtypes	Detected Frequency	Average	Max	Min	Total
bacitracin__bacA	1	14.1272	606.727	1.07328	13915.3
novobiocin__novA	0.99797	10.0671	66.3106	0	9916.05
sulfonamide__sul1	0.375635	8.89183	880.148	0	8758.45
florfenicol__floR	0.486294	8.27517	1087.87	0	8151.04
sulfonamide__sul2	0.313706	6.62347	887.224	0	6524.12
rifamycin__rphB	0.998985	5.58266	21.2824	0	5498.92
multidrug__MexF	1	3.91751	26.0094	0.204567	3858.75
rifamycin__rphA	0.995939	3.58601	12.2406	0	3532.22
aminoglycoside__APH(3'')-Ib	0.239594	3.52524	513.539	0	3472.36
tetracycline__tet(M)	0.787817	3.27316	747.357	0	3224.06
tetracycline__tetA(48)	0.981726	3.14868	74.9921	0	3101.45
aminoglycoside__APH(6)-Id	0.185787	3.08415	512.724	0	3037.89
tetracycline__tetX2	0.204061	3.07575	240.412	0	3029.62
macrolide-lincosamide-streptogramin__erm(B)	0.0913706	3.03896	1156.44	0	2993.37
macrolide-lincosamide-streptogramin__optrA	0.0659898	2.95763	1127.98	0	2913.26
macrolide-lincosamide-streptogramin__lnu(A)	0.0436548	2.7023	1123.09	0	2661.76
multidrug__MuxB	1	2.6889	13.7713	0.238231	2648.57
macrolide-lincosamide-streptogramin__erm(F)	0.0893401	2.64341	282.414	0	2603.76
macrolide-lincosamide-streptogramin__lnu(H)	0.127919	2.59121	303.499	0	2552.34
rifamycin__RbpA	0.909645	2.4341	18.6996	0	2397.59
polymyxin__rosA	0.998985	2.42205	100.845	0	2385.72
vancomycin__vanXO	0.869036	2.42156	19.8862	0	2385.23
aminoglycoside__aadS	0.108629	2.39063	155.942	0	2354.77
rifamycin__iri	0.971574	2.25786	30.1785	0	2223.99
mupirocin__Bifidobacteria intrinsic ileS conferring resistance to mupirocin	0.987817	2.12831	27.2219	0	2096.38
polymyxin__rosB	0.992893	2.09505	147.756	0	2063.63
polymyxin__ugd	0.936041	2.08184	358.023	0	2050.61
multidrug__qacEdelta1	0.220305	2.04002	174.261	0	2009.42
macrolide-lincosamide-streptogramin__macB	0.991878	1.97215	116.908	0	1942.57
aminoglycoside__APH(3')-IIIa	0.0862944	1.95252	684.454	0	1923.23
aminoglycoside__ANT(4')-Ib	0.0680203	1.94224	754.48	0	1913.11
macrolide-lincosamide-streptogramin__erm(A)	0.0730964	1.89149	746.319	0	1863.12
tetracycline__tet(X3)	0.188832	1.84234	180.137	0	1814.7
chloramphenicol__cmx	0.352284	1.76895	241.098	0	1742.42
tetracycline__tet(G)	0.201015	1.76844	223.931	0	1741.91
tetracycline__tet(36)	0.0771574	1.75172	191.224	0	1725.44
multidrug__msbA	0.985787	1.64755	438.087	0	1622.84
macrolide-lincosamide-streptogramin__poxtA	0.0335025	1.61239	729.503	0	1588.2
bleomycin__bleomycin resistance protein	0.160406	1.58857	643.673	0	1564.75
macrolide-lincosamide-streptogramin__ere(D)	0.071066	1.5456	213.517	0	1522.41
rifamycin__arr-1	0.913706	1.53238	8.19145	0	1509.39
tetracycline__otr(A)	0.954315	1.50734	17.0779	0	1484.73
aminoglycoside__ANT(9)-Ia	0.080203	1.44171	589.006	0	1420.09
aminoglycoside__ANT(6)-Ia	0.192893	1.43254	466.045	0	1411.05
aminoglycoside__AAC(6')-Ie-APH(2'')-Ia	0.0822335	1.3624	576.281	0	1341.96
multidrug__RanA	0.917766	1.36061	60.0846	0	1340.2
tetracycline__tet(T)	0.194924	1.33342	606.333	0	1313.42
multidrug__fexB	0.0152284	1.31435	568.12	0	1294.64
aminoglycoside__APH(3')-Ia	0.186802	1.29114	263.788	0	1271.77
multidrug__efpA	0.944162	1.2707	17.1366	0	1251.64
multidrug__MexB	1	1.25047	55.9121	0.0818072	1231.71
beta_lactam__OXA-347	0.0558376	1.1611	132.93	0	1143.69
macrolide-lincosamide-streptogramin__mel	0.225381	1.06731	243.027	0	1051.3
aminoglycoside__aadA	0.252792	1.06277	98.5902	0	1046.83
aminoglycoside__aad(6)	0.126904	1.03531	306.007	0	1019.78
multidrug__tap	0.906599	0.995526	5.28805	0	980.594
tetracycline__tet(L)	0.218274	0.994356	174.389	0	979.441
multidrug__MuxC	1	0.992086	11.4766	0.0421684	977.205
macrolide-lincosamide-streptogramin__ole(C)	0.911675	0.979676	8.66196	0	964.981
tetracycline__tet(V)	0.91066	0.915847	5.44893	0	902.11
polymyxin__arnA	0.906599	0.89462	275.598	0	881.2
vancomycin__vanXI	0.781726	0.892713	11.2456	0	879.323
multidrug__mdtK	0.292386	0.873086	749.174	0	859.989
multidrug__mexK	0.99797	0.84371	17.4789	0	831.054
multidrug__mexW	0.998985	0.831454	9.89431	0	818.982
vancomycin__vanI	0.845685	0.816767	6.13894	0	804.516
multidrug__oqxB	0.998985	0.816343	110.063	0	804.098
quinolone__qepA	0.88934	0.768473	5.73591	0	756.946
trimethoprim__dfrA1	0.0690355	0.751241	146.119	0	739.972
multidrug__qacE	0.167513	0.716697	59.6969	0	705.947
beta_lactam__CRD3-1	0.864975	0.714909	8.02985	0	704.186
vancomycin__vanHO	0.815228	0.685623	5.7855	0	675.338
aminoglycoside__AAC(2')-Ib	0.805076	0.683507	6.00706	0	673.255
streptothricin__SAT-4	0.071066	0.660194	208.669	0	650.291
multidrug__ceoB	0.995939	0.659748	24.5601	0	649.852
tetracycline__tetB(48)	0.8	0.658482	31.2213	0	648.605
multidrug__adeF	0.995939	0.650969	6.12263	0	641.205
chloramphenicol__catB3	0.222335	0.645982	67.8019	0	636.292
aminoglycoside__AAC(3)-IV	0.515736	0.621406	188.327	0	612.085
rifamycin__arr-3	0.596954	0.618261	49.3847	0	608.988
chloramphenicol__catB8	0.171574	0.616854	63.3492	0	607.601
multidrug__smeE	0.994924	0.614918	16.5321	0	605.694
tetracycline__tetB(P)	0.516751	0.60279	156.659	0	593.749
chloramphenicol__fexA	0.0659898	0.57696	159.071	0	568.305
tetracenomycin_C__tcmA	0.856853	0.576933	7.70741	0	568.279
vancomycin__vanO	0.812183	0.574901	5.17173	0	566.277
tetracycline__tet(Z)	0.0700508	0.572504	100.296	0	563.917
tetracycline__tetA(P)	0.229442	0.561406	143.773	0	552.985
trimethoprim__dfrG	0.128934	0.555453	194.399	0	547.121
rifamycin__arr-2	0.401015	0.554529	72.7022	0	546.211
bacitracin__bcrA	0.876142	0.553919	22.5149	0	545.611
aminoglycoside__aadA23	0.141117	0.536068	74.6669	0	528.027
fosfomycin__FosA	0.140102	0.522015	478.402	0	514.184
tetracycline__tet(H)	0.0365482	0.518926	96.6919	0	511.143
multidrug__acrF	0.988832	0.516121	248.003	0	508.38
fosfomycin__FosB	0.35533	0.515627	122.49	0	507.892
tetracycline__tet(59)	0.0365482	0.515238	132.077	0	507.509
tetracycline__tet(W)	0.154315	0.509031	91.1203	0	501.396
tetracycline__tet(39)	0.0954315	0.507719	147.725	0	500.103
aminoglycoside__APH(3')-VIa	0.0233503	0.479885	205.391	0	472.687
multidrug__mdtH	0.193909	0.477242	397.292	0	470.084
beta_lactam__CMH-1	0.0142132	0.472826	462.628	0	465.734
macrolide-lincosamide-streptogramin__lnu(D)	0.0690355	0.46321	133.189	0	456.262
aminoglycoside__spd	0.0071066	0.455377	264.262	0	448.546
multidrug__Escherichia coli mdfA	0.174619	0.448648	378.915	0	441.919
tetracycline__tet(43)	0.735025	0.448152	5.54383	0	441.429
other_peptide_antibiotics__microcin efflux pumu gene yojI	0.213198	0.446865	380.708	0	440.162
aminoglycoside__AAC(6')-IIa	0.349239	0.445206	83.5039	0	438.528
chloramphenicol__catQ	0.0538071	0.442973	135.077	0	436.329
aminoglycoside__Other streptomycin resistance protein	0.0497462	0.435999	179.988	0	429.459
aminoglycoside__aadA14	0.0314721	0.429691	105.931	0	423.246
multidrug__emrD	0.190863	0.422348	345.353	0	416.013
macrolide-lincosamide-streptogramin__vat(F)	0.746193	0.419836	4.80799	0	413.538
beta_lactam__Klebsiella pneumoniae OmpK37	0.15533	0.408101	363.241	0	401.98
tetracycline__tet(A)	0.2	0.406982	47.2121	0	400.877
multidrug__MexE	0.772589	0.392087	126.145	0	386.206
tetracycline__tet(33)	0.135025	0.390305	35.1565	0	384.45
macrolide-lincosamide-streptogramin__erm(35)	0.0375635	0.385168	111.336	0	379.39
multidrug__RanB	0.354315	0.380897	66.3911	0	375.184
macrolide-lincosamide-streptogramin__cfr(A)	0.0497462	0.374263	87.5066	0	368.649
polymyxin__pmrF	0.303553	0.364053	276.221	0	358.592
quinolone__QepA4	0.805076	0.348724	2.84203	0	343.493
macrolide-lincosamide-streptogramin__lsa(E)	0.0781726	0.346504	62.7041	0	341.307
macrolide-lincosamide-streptogramin__erm(X)	0.0720812	0.34067	95.1997	0	335.56
tetracycline__tet(X5)	0.0609137	0.336277	30.672	0	331.233
multidrug__emrA	0.787817	0.330845	131.334	0	325.883
aminoglycoside__AAC(6')-Ib-cr	0.0741117	0.32839	54.8148	0	323.464
multidrug__emrB	0.828426	0.325752	127.667	0	320.865
tetracycline__tet(Q)	0.0913706	0.324499	37.0738	0	319.632
tetracycline__tet(Y)	0.0426396	0.324362	62.1745	0	319.497
tetracycline__tet(C)	0.251777	0.320824	69.2532	0	316.011
aminoglycoside__aadA5	0.109645	0.315431	52.5844	0	310.7
beta_lactam__blaF	0.762437	0.314648	2.56588	0	309.928
sulfonamide__sul4	0.655838	0.312332	10.4406	0	307.647
aminoglycoside__AAC(3)-IVb	0.71066	0.311559	2.73718	0	306.886
fosfomycin__FosB5	0.013198	0.310049	116.193	0	305.398
multidrug__sdeY	0.968528	0.307367	96.7389	0	302.757
chloramphenicol__catA8	0.0263959	0.303397	132.764	0	298.846
fosfomycin__FosB3	0.0101523	0.303272	113.702	0	298.723
aminoglycoside__APH(4)-Ia	0.0395939	0.302161	96.78	0	297.629
beta_lactam__BJP-1	0.511675	0.296118	8.01666	0	291.676
trimethoprim__dfrA27	0.0274112	0.292084	47.8269	0	287.702
multidrug__mdtL	0.136041	0.289773	231.123	0	285.426
aminoglycoside__aadA3	0.129949	0.283286	36.2689	0	279.037
macrolide-lincosamide-streptogramin__macA	0.876142	0.283255	126.054	0	279.006
trimethoprim__dfrA17	0.0335025	0.280965	39.0423	0	276.75
vancomycin__vanA	0.792893	0.279166	2.12804	0	274.979
aminoglycoside__apmA	0.0284264	0.274886	105.111	0	270.763
macrolide-lincosamide-streptogramin__erm(47)	0.0294416	0.274274	131.594	0	270.16
macrolide-lincosamide-streptogramin__lnu(B)	0.071066	0.272808	49.3142	0	268.715
macrolide-lincosamide-streptogramin__lsa(B)	0.390863	0.271848	25.5591	0	267.771
beta_lactam__OXA-209	0.0751269	0.271588	32.1737	0	267.514
trimethoprim__dfrA20	0.0314721	0.271418	69.6371	0	267.347
multidrug__MexD	0.966497	0.269503	23.7324	0	265.46
macrolide-lincosamide-streptogramin__cfr(C)	0.093401	0.265362	64.8914	0	261.381
trimethoprim__dfrB2	0.373604	0.264734	10.7525	0	260.763
macrolide-lincosamide-streptogramin__ere(A)	0.0974619	0.262716	62.3915	0	258.776
macrolide-lincosamide-streptogramin__erm(T)	0.0598985	0.260044	124.145	0	256.143
chloramphenicol__catB11	0.300508	0.257685	43.2111	0	253.82
multidrug__efrB	0.769543	0.253654	33.0304	0	249.849
macrolide-lincosamide-streptogramin__mef(C)	0.0751269	0.248958	27.3452	0	245.223
aminoglycoside__AAC(3)-Id	0.572589	0.248835	5.116	0	245.102
macrolide-lincosamide-streptogramin__vat(E)	0.0253807	0.248209	152.783	0	244.486
beta_lactam__CARB-10	0.0243655	0.24623	68.3181	0	242.536
pleuromutilin_tiamulin__TaeA	0.851777	0.239605	6.81452	0	236.011
aminoglycoside__aadA12	0.119797	0.23496	23.9179	0	231.435
macrolide-lincosamide-streptogramin__lnu(C)	0.0507614	0.232766	62.5319	0	229.275
macrolide-lincosamide-streptogramin__mph(G)	0.071066	0.231901	26.5879	0	228.422
aminoglycoside__APH(3')-VI	0.0243655	0.231401	88.2613	0	227.93
beta_lactam__FEZ-1	0.673096	0.230909	3.03242	0	227.446
multidrug__tolC	0.495431	0.229033	154.153	0	225.598
macrolide-lincosamide-streptogramin__erm(42)	0.0345178	0.226674	65.0249	0	223.274
beta_lactam__CARB-5	0.0182741	0.225135	59.0473	0	221.758
tetracycline__tet(32)	0.0994924	0.223726	36.7909	0	220.37
trimethoprim__dfrA16	0.0507614	0.223134	29.4984	0	219.787
tetracycline__otr(C)	0.701523	0.222738	3.08915	0	219.397
aminoglycoside__AAC(2')-Ic	0.437563	0.217278	9.98038	0	214.019
tetracycline__tet(O)	0.469036	0.217091	25.211	0	213.835
macrolide-lincosamide-streptogramin__cfr(D)	0.0121827	0.216643	134.094	0	213.393
macrolide-lincosamide-streptogramin__erm(C)	0.0791878	0.212267	46.6321	0	209.083
multidrug__mexQ	0.986802	0.212251	1.10808	0	209.067
multidrug__Other_major_facilitator_superfamily_transporter	0.499492	0.21033	18.4066	0	207.175
multidrug__mexN	0.983756	0.205023	4.27886	0	201.948
multidrug__bpeF	0.986802	0.202971	11.216	0	199.926
florfenicol__pp-flo	0.0741117	0.201928	22.8992	0	198.899
tetracycline__tetX6	0.0751269	0.201396	17.9034	0	198.375
aminoglycoside__aadA22	0.0994924	0.196194	26.746	0	193.251
quinolone__lfrA	0.700508	0.195311	2.19324	0	192.382
chloramphenicol__Agrobacterium fabrum chloramphenicol acetyltransferase	0.280203	0.195025	8.88716	0	192.099
vancomycin__vanHF	0.676142	0.192906	1.85453	0	190.012
aminoglycoside__AAC(6')-Ib'	0.093401	0.19253	27.0262	0	189.642
beta_lactam__AIM-1	0.217259	0.192023	14.1572	0	189.143
vancomycin__vanXF	0.608122	0.190062	2.27068	0	187.211
multidrug__OprM	0.770558	0.185107	13.3776	0	182.33
fosfomycin__FosB1	0.00913706	0.182122	73.3968	0	179.39
aminoglycoside__AAC(3)-IId	0.0497462	0.180697	40.2145	0	177.986
aminoglycoside__aadA2	0.11066	0.177475	24.6755	0	174.813
multidrug__oprC	0.993909	0.175016	2.24485	0	172.391
macrolide-lincosamide-streptogramin__erm(G)	0.0730964	0.174509	38.4847	0	171.891
beta_lactam__LRA-3	0.525888	0.172987	2.43646	0	170.393
beta_lactam__OXA-21	0.0984772	0.171475	40.9139	0	168.903
streptothricin__SAT-2	0.0345178	0.171146	34.1976	0	168.579
chloramphenicol__cmlA5	0.0659898	0.170557	33.4898	0	167.999
multidrug__qacH	0.253807	0.170429	9.05848	0	167.872
multidrug__PmpM	0.398985	0.164608	12.2829	0	162.139
tetracycline__tet(44)	0.103553	0.161765	20.4029	0	159.338
quinolone__mfpA	0.383756	0.158485	8.77449	0	156.108
tetracycline__tet(X)	0.0517766	0.157153	13.3636	0	154.796
aminoglycoside__APH(6)-Ic	0.537056	0.156361	6.98028	0	154.016
vancomycin__vanJ	0.566497	0.156199	21.7962	0	153.856
multidrug__abeM	0.113706	0.154755	26.8859	0	152.434
aminoglycoside__aadA16	0.093401	0.152179	27.8915	0	149.896
quinolone__Acinetobacter baumannii AbaQ	0.384772	0.152025	28.8052	0	149.744
beta_lactam__VEB-1	0.0274112	0.150964	90.2577	0	148.7
aminoglycoside__AAC(6')-Isa	0.438579	0.150508	5.51863	0	148.251
aminoglycoside__aadA17	0.0873096	0.148857	17.696	0	146.625
multidrug__mdtE	0.250761	0.147767	118.608	0	145.55
beta_lactam__OXA-1	0.035533	0.146421	34.1163	0	144.225
macrolide-lincosamide-streptogramin__mef(En2)	0.035533	0.145616	39.9724	0	143.432
trimethoprim__DfrA36	0.0771574	0.145119	12.6083	0	142.942
aminoglycoside__AAC(6')-Ib11	0.0446701	0.145111	20.8016	0	142.934
multidrug__mdsB	0.982741	0.142741	2.60982	0	140.6
aminoglycoside__aadA8	0.11066	0.142263	19.5852	0	140.129
aminoglycoside__ANT(6)-Ib	0.0619289	0.14138	20.5756	0	139.259
multidrug__oqxA	0.298477	0.138344	106.603	0	136.269
multidrug__mdtF	0.918782	0.136234	37.9105	0	134.191
quinolone__norB	0.596954	0.13595	3.59373	0	133.91
tetracycline__tet(S)	0.093401	0.135928	54.3332	0	133.889
aminoglycoside__AAC(3)-Ib	0.434518	0.135521	2.48054	0	133.489
beta_lactam__PRC-1	0.057868	0.135371	36.0223	0	133.34
aminoglycoside__aadA8b	0.100508	0.135004	16.049	0	132.979
macrolide-lincosamide-streptogramin__linG	0.140102	0.131238	12.0237	0	129.269
vancomycin__vanF	0.613198	0.130606	1.37707	0	128.647
multidrug__amrB	0.958376	0.130495	2.28656	0	128.538
aminoglycoside__AAC(3)-Ia	0.394924	0.126476	3.16147	0	124.579
aminoglycoside__AAC(6')-Ib9	0.0680203	0.125989	14.7462	0	124.099
macrolide-lincosamide-streptogramin__vat(B)	0.235533	0.125974	18.6463	0	124.085
chloramphenicol__Campylobacter coli chloramphenicol acetyltransferase	0.022335	0.12501	34.587	0	123.135
macrolide-lincosamide-streptogramin__lnu(G)	0.0913706	0.123985	29.2712	0	122.125
macrolide-lincosamide-streptogramin__erm(37)	0.277157	0.123362	7.37039	0	121.512
aminoglycoside__AAC(6')-Ib7	0.119797	0.120034	13.0895	0	118.233
aminoglycoside__AAC(3)-IIIc	0.540102	0.119741	2.39323	0	117.945
aminoglycoside__AAC(3)-IIIb	0.494416	0.118733	2.20057	0	116.952
trimethoprim__dfrB3	0.230457	0.118262	3.67176	0	116.488
aminoglycoside__ANT(2'')-Ia	0.0568528	0.115378	40.4611	0	113.647
chloramphenicol__Streptomyces lividans cmlR	0.485279	0.115085	12.8265	0	113.358
aminoglycoside__AAC(3)-IIe	0.0984772	0.114379	18.8996	0	112.663
trimethoprim__dfrB6	0.206091	0.113857	8.33597	0	112.149
beta_lactam__L1 beta-lactamase	0.35533	0.113447	14.4362	0	111.745
rifamycin__rgt1438	0.637563	0.111862	5.19216	0	110.184
beta_lactam__CARB-14	0.0162437	0.110314	30.3794	0	108.66
tetracycline__tet(42)	0.416244	0.11012	2.30055	0	108.468
aminoglycoside__aadA21	0.0730964	0.109766	15.2719	0	108.12
beta_lactam__OXA-10	0.0527919	0.105255	19.8952	0	103.676
beta_lactam__CARB-16	0.013198	0.104201	28.3113	0	102.638
macrolide-lincosamide-streptogramin__gimA	0.53198	0.10356	2.99546	0	102.007
quinolone__QepA2	0.577665	0.103526	1.00592	0	101.973
fosfomycin__Acinetobacter baumannii AbaF	0.502538	0.101633	4.79153	0	100.108
aminoglycoside__AAC(3)-Ic	0.351269	0.0993575	2.58269	0	97.8671
multidrug__OprN	0.568528	0.0976925	9.38399	0	96.2271
beta_lactam__VIM-1	0.0964467	0.0966036	9.80763	0	95.1545
multidrug__OpmH	0.461929	0.0960199	7.15569	0	94.5796
macrolide-lincosamide-streptogramin__lmrC	0.647716	0.0948492	5.20371	0	93.4265
chloramphenicol__catB10	0.186802	0.093514	6.43841	0	92.1113
other_peptide_antibiotics__ArnT	0.108629	0.0930879	77.2699	0	91.6916
beta_lactam__DHT2-1	0.346193	0.0927891	2.43049	0	91.3972
rifamycin__arr-4	0.353299	0.0915845	2.51694	0	90.2108
macrolide-lincosamide-streptogramin__mph(B)	0.141117	0.0895095	18.0303	0	88.1669
macrolide-lincosamide-streptogramin__mgtA	0.481218	0.0888027	1.64587	0	87.4707
beta_lactam__ALG6-1	0.502538	0.0837513	0.939523	0	82.495
macrolide-lincosamide-streptogramin__oleD	0.514721	0.082909	1.81729	0	81.6654
macrolide-lincosamide-streptogramin__LlmA 23S ribosomal RNA methyltransferase	0.388832	0.0824479	1.51913	0	81.2112
macrolide-lincosamide-streptogramin__clcD	0.0598985	0.0819471	34.5419	0	80.7178
multidrug__MexA	0.57868	0.0818243	4.68288	0	80.597
aminoglycoside__aadA9	0.0781726	0.0812853	9.08807	0	80.066
macrolide-lincosamide-streptogramin__cfr(E)	0.0375635	0.0810063	17.07	0	79.7912
multidrug__MexC	0.586802	0.0796576	5.08861	0	78.4628
aminoglycoside__aadA24	0.0761421	0.0792762	10.5026	0	78.0871
chloramphenicol__Lactobacillus reuteri cat-TC	0.0446701	0.079259	24.4108	0	78.0701
macrolide-lincosamide-streptogramin__mef(B)	0.0659898	0.0792485	17.8027	0	78.0598
tetracycline__tet(B)	0.0314721	0.0783734	29.0015	0	77.1978
chloramphenicol__Pseudomonas aeruginos catB6	0.0659898	0.0775838	6.88938	0	76.42
multidrug__smeD	0.610152	0.0771465	3.94148	0	75.9893
macrolide-lincosamide-streptogramin__mph(A)	0.0568528	0.077123	12.5536	0	75.9662
beta_lactam__THIN-B beta-lactamase	0.460914	0.0769315	1.42799	0	75.7775
beta_lactam__CARB-12	0.0263959	0.076672	19.259	0	75.522
macrolide-lincosamide-streptogramin__lnu(F)	0.11066	0.0764999	19.3852	0	75.3524
tetracycline__tet(30)	0.255838	0.0763571	4.5453	0	75.2118
tetracycline__tet(31)	0.0263959	0.0763111	15.0932	0	75.1664
beta_lactam__LRA-12	0.404061	0.0763034	2.21141	0	75.1588
beta_lactam__ALG11-1	0.367513	0.0761624	2.38332	0	75.0199
trimethoprim__dfrA14	0.0324873	0.0759545	12.6712	0	74.8151
aminoglycoside__AAC(6')-31	0.295431	0.0759006	2.94634	0	74.7621
tetracycline__tet(34)	0.0538071	0.0756067	59.0919	0	74.4726
mupirocin__mupB	0.683249	0.075474	1.24447	0	74.3419
aminoglycoside__APH(3')-IIa	0.121827	0.0748206	8.05444	0	73.6983
chloramphenicol__cmlv	0.458883	0.0746372	1.02787	0	73.5176
beta_lactam__blaS1	0.451777	0.0739694	1.12416	0	72.8598
multidrug__acrE	0.249746	0.0711394	51.893	0	70.0723
trimethoprim__dfrA5	0.0304569	0.0711337	12.1188	0	70.0667
aminoglycoside__aadA13	0.0700508	0.0701121	10.0273	0	69.0604
aminoglycoside__APH(3')-Ib	0.0822335	0.0695372	14.6154	0	68.4942
beta_lactam__LRA-19	0.445685	0.0686724	1.09871	0	67.6423
beta_lactam__CARB-8	0.0142132	0.0655087	15.261	0	64.5261
multidrug__abcA	0.663959	0.0653167	0.80234	0	64.337
fosfomycin__FosB4	0.0101523	0.064345	24.4656	0	63.3798
trimethoprim__dfrA12	0.0558376	0.0643217	9.7409	0	63.3569
trimethoprim__dfrA15	0.0314721	0.0636514	10.7226	0	62.6967
beta_lactam__TEM-117	0.0730964	0.0631435	7.83156	0	62.1963
multidrug__efrA	0.386802	0.0625796	17.5533	0	61.6409
aminoglycoside__npmA	0.00507614	0.0625605	29.5143	0	61.6221
rifamycin__arr-8	0.118782	0.0622155	9.53873	0	61.2822
beta_lactam__EXO beta-lactamase	0.407107	0.0610557	1.31528	0	60.1398
multidrug__OprJ	0.258883	0.0609686	9.09401	0	60.054
macrolide-lincosamide-streptogramin__lnu(P)	0.0609137	0.060455	7.87392	0	59.5481
macrolide-lincosamide-streptogramin__cipA	0.0538071	0.0599868	28.2259	0	59.087
aminoglycoside__APH(6)-Ib	0.386802	0.0598676	1.48265	0	58.9696
aminoglycoside__aadA6/aadA10	0.0873096	0.058655	4.47231	0	57.7752
beta_lactam__JOHN-1	0.124873	0.058622	4.67216	0	57.7427
tetracycline__tetX1	0.213198	0.0584371	4.58863	0	57.5605
beta_lactam__CARB-6	0.0294416	0.058425	12.0277	0	57.5486
beta_lactam__LMB-1	0.120812	0.0578989	9.72464	0	57.0304
multidrug__adeI	0.15736	0.0567506	10.0923	0	55.8993
aminoglycoside__AAC(6')-Ib-Hangzhou	0.0446701	0.0566283	8.03103	0	55.7789
beta_lactam__GPC-1	0.145178	0.0562329	3.15647	0	55.3894
aminoglycoside__AAC(6')-Ib10	0.0517766	0.0561919	5.63226	0	55.349
multidrug__emeA	0.0345178	0.0561374	15.5096	0	55.2953
beta_lactam__PEDO-1	0.356345	0.0560755	1.28567	0	55.2344
tetracycline__tet(U)	0.0101523	0.0560026	28.938	0	55.1626
macrolide-lincosamide-streptogramin__erm(36)	0.035533	0.0547577	18.9967	0	53.9363
aminoglycoside__AAC(6')-Ib	0.0598985	0.0527169	9.81719	0	51.9261
fosfomycin__FosM2	0.0984772	0.0523868	19.501	0	51.601
tetracycline__tet(K)	0.0243655	0.0523275	30.6963	0	51.5426
puromycin__puromycin resistance protein	0.492386	0.0523011	5.26569	0	51.5165
vancomycin__vanD	0.385787	0.0511244	1.03484	0	50.3575
trimethoprim__dfrA3	0.210152	0.050988	1.34651	0	50.2232
beta_lactam__OXA-296	0.0233503	0.0499076	13.4259	0	49.159
rifamycin__arr-5	0.201015	0.048876	2.61401	0	48.1429
beta_lactam__Burkholderia pseudomallei Omp38	0.130964	0.0480804	11.0566	0	47.3592
vancomycin__vanHA	0.385787	0.0480575	0.843076	0	47.3366
beta_lactam__PLN-1	0.283249	0.0479276	1.95329	0	47.2087
tetracycline__tet(40)	0.0964467	0.047166	6.85696	0	46.4585
beta_lactam__GRD33-1	0.281218	0.0469827	1.08535	0	46.278
aminoglycoside__aadA7	0.0639594	0.0466656	7.85899	0	45.9656
chloramphenicol__Streptococcus suis chloramphenicol acetyltransferase	0.0477157	0.0465989	19.2422	0	45.8999
chloramphenicol__catB2	0.182741	0.0458234	9.22728	0	45.1361
multidrug__Klebsiella pneumoniae acrA	0.263959	0.0458163	32.5232	0	45.129
beta_lactam__TEM-1	0.0751269	0.0454564	5.67818	0	44.7746
macrolide-lincosamide-streptogramin__lnu(E)	0.00913706	0.0448338	33.8173	0	44.1613
beta_lactam__LRA-5	0.28934	0.0443601	0.842993	0	43.6947
polymyxin__eptA	0.161421	0.0443477	7.49122	0	43.6824
aminoglycoside__APH(6)-Ia	0.311675	0.0439226	1.05243	0	43.2637
beta_lactam__OXA-3	0.0893401	0.0431421	8.86468	0	42.495
tetracycline__tet(61)	0.0172589	0.0431013	19.7057	0	42.4548
beta_lactam__POM-2	0.203046	0.0426765	6.92644	0	42.0363
macrolide-lincosamide-streptogramin__mph(F)	0.0294416	0.0423361	9.40522	0	41.701
macrolide-lincosamide-streptogramin__erm(40)	0.164467	0.0416247	9.88353	0	41.0004
tetracycline__tet(O/W)	0.0629442	0.0415206	7.09591	0	40.8978
multidrug__efmA	0.0152284	0.0414096	16.0949	0	40.7885
multidrug__Enterobacter cloacae acrA	0.240609	0.0413453	33.2009	0	40.7251
beta_lactam__LRA-9	0.229442	0.0409385	1.34087	0	40.3245
trimethoprim__DfrB9	0.114721	0.0409253	2.99872	0	40.3115
trimethoprim__dfrA19	0.0152284	0.0408717	27.0212	0	40.2586
tetracycline__tet(41)	0.28731	0.0408355	1.39295	0	40.223
fosfomycin__FosL1	0.0071066	0.0407725	27.2392	0	40.1609
multidrug__mtrD	0.785787	0.0402457	0.632836	0	39.642
fosfomycin__FosX	0.182741	0.0393173	1.3211	0	38.7276
beta_lactam__OXA-50	0.162437	0.0392863	5.31674	0	38.697
macrolide-lincosamide-streptogramin__erm(39)	0.231472	0.0389529	2.34103	0	38.3686
bleomycin__BLMT	0.0324873	0.0388811	7.4211	0	38.2979
tetracycline__tet(56)	0.341117	0.0385553	0.737705	0	37.977
macrolide-lincosamide-streptogramin__lmrD	0.0467005	0.0381027	13.6068	0	37.5311
mupirocin__mupA	0.491371	0.038022	1.08946	0	37.4517
multidrug__bmr	0.273096	0.0379098	1.48044	0	37.3411
multidrug__Escherichia coli acrA	0.261929	0.0368582	19.2545	0	36.3053
beta_lactam__LRA-10	0.346193	0.0364367	0.749025	0	35.8902
macrolide-lincosamide-streptogramin__myrA	0.291371	0.0364154	0.99413	0	35.8692
vancomycin__vanB	0.311675	0.0363113	0.774592	0	35.7666
macrolide-lincosamide-streptogramin__erm(50)	0.0954315	0.0359951	4.96894	0	35.4551
beta_lactam__CfxA6	0.0243655	0.0354869	10.2384	0	34.9546
macrolide-lincosamide-streptogramin__emtA	0.0324873	0.035464	13.9109	0	34.9321
macrolide-lincosamide-streptogramin__erm(Y)	0.0416244	0.0349875	8.42445	0	34.4627
multidrug__mdtM	0.0558376	0.0349026	7.19772	0	34.3791
aminoglycoside__AAC(6')-32	0.210152	0.0345733	1.42361	0	34.0547
beta_lactam__Escherichia coli ampC	0.0436548	0.0332555	7.67842	0	32.7567
beta_lactam__Rm3	0.280203	0.033144	1.46572	0	32.6469
aminoglycoside__aphA15	0.0213198	0.0331092	5.21934	0	32.6126
macrolide-lincosamide-streptogramin__erm(33)	0.0365482	0.0328928	11.3408	0	32.3994
trimethoprim__dfrB4	0.0598985	0.0326323	3.99503	0	32.1428
macrolide-lincosamide-streptogramin__cfr(B)	0.0507614	0.0321432	6.01932	0	31.661
other_peptide_antibiotics__thiostrepton resistance gene tsnR	0.213198	0.0320437	0.845154	0	31.5631
beta_lactam__PER-1	0.0304569	0.0320013	10.3409	0	31.5213
multidrug__mexJ	0.293401	0.031722	3.09248	0	31.2462
fosfomycin__FosC2	0.0314721	0.0317026	4.28908	0	31.2271
macrolide-lincosamide-streptogramin__erm(O)	0.212183	0.0314675	2.40834	0	30.9955
sulfonamide__sul3	0.0284264	0.031294	7.3059	0	30.8246
tetracycline__tet(X4)	0.0436548	0.0309238	3.24744	0	30.46
pleuromutilin_tiamulin__msr(G)	0.191878	0.0303861	4.14513	0	29.9303
beta_lactam__CARB-1	0.0284264	0.0302251	5.01768	0	29.7717
beta_lactam__BKC-1	0.138071	0.0298879	1.9649	0	29.4395
beta_lactam__CAU-1	0.148223	0.0291353	1.20577	0	28.6982
tetracycline__tet(58)	0.0152284	0.0289436	12.5053	0	28.5094
macrolide-lincosamide-streptogramin__carA	0.340102	0.0288989	0.754356	0	28.4654
tetracycline__tet(62)	0.0314721	0.0280414	6.49056	0	27.6208
multidrug__opcM	0.297462	0.0279374	4.86926	0	27.5183
macrolide-lincosamide-streptogramin__erm(Q)	0.0507614	0.0277012	5.08588	0	27.2857
tetracycline__tet(47)	0.297462	0.0276896	0.602045	0	27.2742
quinolone__QnrVC1	0.0192893	0.027194	6.62262	0	26.7861
aminoglycoside__AAC(3)-VIIa	0.211168	0.0270923	1.25497	0	26.6859
multidrug__emrK	0.425381	0.0269719	1.55218	0	26.5673
vancomycin__vanXA	0.198985	0.0266099	1.38739	0	26.2108
aminoglycoside__aadA27	0.0274112	0.0265344	5.24871	0	26.1364
multidrug__smeF	0.387817	0.0261208	0.876241	0	25.729
beta_lactam__CfxA2	0.0284264	0.0260535	4.01681	0	25.6627
beta_lactam__MYO-1	0.0375635	0.0259687	11.1581	0	25.5792
beta_lactam__CARB-3	0.0294416	0.02593	4.44009	0	25.541
antibacterial_fatty_acid__farA	0.380711	0.025862	0.500823	0	25.4741
aminoglycoside__aadK	0.180711	0.0250757	0.887533	0	24.6995
macrolide-lincosamide-streptogramin__lmrB	0.253807	0.0249082	0.795708	0	24.5345
aminoglycoside__aadA25	0.0548223	0.0248179	2.72017	0	24.4456
macrolide-lincosamide-streptogramin__erm(38)	0.220305	0.0247926	0.527019	0	24.4207
beta_lactam__LRA-7	0.179695	0.024727	0.883164	0	24.3561
aminoglycoside__AAC(2')-Ie	0.135025	0.0246766	1.38494	0	24.3064
macrolide-lincosamide-streptogramin__vat(H)	0.209137	0.0246653	0.738596	0	24.2953
aminoglycoside__AAC(3)-IIc	0.0781726	0.024488	5.02682	0	24.1207
aminoglycoside__aadA10	0.0923858	0.0242775	2.28179	0	23.9133
aminoglycoside__AAC(6')-Ib-Suzhou	0.0284264	0.0241249	4.57151	0	23.763
macrolide-lincosamide-streptogramin__vga(E)	0.0294416	0.0235228	10.8201	0	23.17
macrolide-lincosamide-streptogramin__erm(E)	0.182741	0.0233263	1.05243	0	22.9764
aminoglycoside__AAC(6')-Ib-SK	0.130964	0.0232343	2.23561	0	22.8858
chloramphenicol__Pseudomonas aeruginos catB7	0.136041	0.0226713	1.25372	0	22.3312
aminoglycoside__AAC(6')-IIb	0.11269	0.0226272	1.47014	0	22.2878
aminoglycoside__AAC(6')-Im	0.0213198	0.0226119	7.46619	0	22.2727
tetracycline__tet(D)	0.0233503	0.0225223	9.74077	0	22.1844
tetracycline__tet(49)	0.210152	0.0223202	1.20879	0	21.9854
trimethoprim__dfrD	0.0548223	0.0221616	3.30811	0	21.8292
quinolone__QnrVC6	0.022335	0.0218584	4.09972	0	21.5306
aminoglycoside__APH(2'')-IIIa	0.0335025	0.0215789	14.3947	0	21.2552
beta_lactam__OXA-444	0.0923858	0.0215384	3.05179	0	21.2153
aminoglycoside__ANT(3'')-Ii-AAC(6')-IId fusion protein	0.0568528	0.0215251	3.98619	0	21.2022
tetracycline__tetB(60)	0.182741	0.0214689	1.67757	0	21.1468
beta_lactam__OXA-58	0.0111675	0.0214483	9.33035	0	21.1266
tetracycline__tetB(46)	0.262944	0.0213985	3.97897	0	21.0775
macrolide-lincosamide-streptogramin__erm(46)	0.103553	0.0213032	1.67371	0	20.9837
tetracycline__tet(35)	0.158376	0.0212869	1.57337	0	20.9676
fosfomycin__FosD	0.00913706	0.0212833	5.73661	0	20.9641
fosfomycin__FosA3	0.0263959	0.0210505	8.82778	0	20.7347
factumycin__facT	0.227411	0.0210002	0.717873	0	20.6852
chloramphenicol__cmrA	0.249746	0.0209194	0.524642	0	20.6056
trimethoprim__dfrF	0.022335	0.0208289	5.78489	0	20.5164
vancomycin__vanZA	0.11269	0.0207018	0.820863	0	20.3913
bacitracin__BahA	0.348223	0.0200923	0.605832	0	19.7909
beta_lactam__OXA-22	0.0690355	0.0200523	3.76291	0	19.7515
multidrug__blt	0.220305	0.0197493	0.55899	0	19.453
chloramphenicol__cmlA8	0.0142132	0.0196731	7.31907	0	19.378
trimethoprim__DfrA42_TMP	0.0142132	0.0196444	3.78471	0	19.3497
macrolide-lincosamide-streptogramin__erm(V)	0.166497	0.0194261	0.65468	0	19.1347
aminoglycoside__APH(2'')-IIa	0.0233503	0.0193968	6.66713	0	19.1059
fosfomycin__FosB6	0.0101523	0.0193931	8.46886	0	19.1022
macrolide-lincosamide-streptogramin__tlr(C)	0.286294	0.019362	0.46032	0	19.0716
vancomycin__vanM	0.213198	0.0193371	0.793072	0	19.047
chloramphenicol__cmlA6	0.0395939	0.0193083	2.78877	0	19.0187
aminoglycoside__AAC(6')-Ib4	0.0243655	0.0189066	2.33284	0	18.623
aminoglycoside__APH(3'')-Ia	0.118782	0.0188782	4.4788	0	18.5951
beta_lactam__OXA-140	0.022335	0.0188611	4.42994	0	18.5782
beta_lactam__CARB-2	0.0263959	0.018551	2.50884	0	18.2727
multidrug__mefF	0.0588832	0.0183108	5.06395	0	18.0361
multidrug__OpmB	0.285279	0.0181738	0.866885	0	17.9012
beta_lactam__TLA-3	0.169543	0.0181264	0.725593	0	17.8545
chloramphenicol__catI	0.0192893	0.0180639	6.18866	0	17.7929
chloramphenicol__Salmonella enterica cmlA	0.0345178	0.0179128	3.30187	0	17.6441
macrolide-lincosamide-streptogramin__vmlR	0.253807	0.0177825	0.422017	0	17.5158
beta_lactam__KHM-1	0.0639594	0.0176986	1.77177	0	17.4331
tetracycline__tet(J)	0.0253807	0.0176218	3.40532	0	17.3575
macrolide-lincosamide-streptogramin__ole(B)	0.20203	0.0176185	2.93414	0	17.3542
beta_lactam__Bla1	0.188832	0.0170657	0.840503	0	16.8097
beta_lactam__OXA-2	0.0913706	0.0169824	1.93222	0	16.7277
multidrug__Escherichia coli emrE	0.035533	0.0167511	3.33584	0	16.4998
beta_lactam__TLA-1	0.161421	0.0167034	1.30363	0	16.4528
beta_lactam__VEB-6	0.0142132	0.0164846	11.8609	0	16.2373
beta_lactam__LRA-1	0.140102	0.0164471	0.526997	0	16.2004
vancomycin__vanC	0.0761421	0.0164043	1.07521	0	16.1583
multidrug__oprA	0.471066	0.016397	0.391232	0	16.151
aminoglycoside__AAC(6')-IIc	0.0720812	0.0162893	1.87188	0	16.0449
multidrug__abeS	0.0446701	0.0162257	3.46368	0	15.9823
beta_lactam__mecA	0.0304569	0.016111	6.07364	0	15.8694
beta_lactam__OXA-486	0.0923858	0.0160477	1.75553	0	15.8069
aminoglycoside__AAC(6')-Il	0.0243655	0.0158483	5.49105	0	15.6106
streptothricin__sta	0.129949	0.0158173	0.793277	0	15.58
macrolide-lincosamide-streptogramin__LpeB	0.458883	0.0153817	0.460892	0	15.151
vancomycin__vanHB	0.139086	0.0153813	1.07075	0	15.1506
beta_lactam__BcIII	0.180711	0.0152877	0.726811	0	15.0583
tetracycline__tet(W/N/W)	0.0507614	0.0152238	2.14924	0	14.9954
beta_lactam__blaC	0.121827	0.0150837	1.23156	0	14.8575
trimethoprim__dfrA22	0.0680203	0.0150074	2.96231	0	14.7823
beta_lactam__OXA-485	0.0243655	0.014863	3.09209	0	14.64
defensin__Brucella suis mprF	0.190863	0.0148432	1.13743	0	14.6206
beta_lactam__SMB-1	0.100508	0.0146093	1.00642	0	14.3902
trimethoprim__dfrA6 from Proteus mirabilis	0.00812183	0.0145623	4.19557	0	14.3439
beta_lactam__PST-1	0.0152284	0.0145325	4.58151	0	14.3145
multidrug__mdtN	0.145178	0.0141758	2.60582	0	13.9631
beta_lactam__PAU-1	0.0720812	0.0141591	4.22955	0	13.9467
macrolide-lincosamide-streptogramin__srm(B)	0.218274	0.01408	0.787807	0	13.8688
vancomycin__vanYA	0.159391	0.0139857	0.616215	0	13.7759
trimethoprim__dfrI	0.0365482	0.0138977	3.90275	0	13.6893
aminoglycoside__APH(3')-IIc	0.0741117	0.0136001	1.54876	0	13.3961
chloramphenicol__catB9	0.0771574	0.0135782	1.26943	0	13.3745
aminoglycoside__APH(3'')-Ic	0.0700508	0.0135511	1.56966	0	13.3478
beta_lactam__LRA-17	0.132995	0.0133734	0.539901	0	13.1728
beta_lactam__OXA-274	0.0121827	0.0133142	3.78796	0	13.1145
beta_lactam__blaZ	0.0213198	0.0131344	3.74147	0	12.9374
beta_lactam__OXA-427	0.048731	0.0130799	2.09843	0	12.8837
fosfomycin__FosK	0.0121827	0.0130784	3.72163	0	12.8823
multidrug__OprZ	0.080203	0.0130763	3.94624	0	12.8801
beta_lactam__AER-1	0.0314721	0.0129508	2.58701	0	12.7566
beta_lactam__TEM-193	0.0385787	0.0129337	1.39404	0	12.7397
trimethoprim__dfrB1	0.0304569	0.0128738	2.42527	0	12.6807
multidrug__MuxA	0.231472	0.0127449	0.499482	0	12.5537
aminoglycoside__APH(2'')-If	0.0324873	0.0125918	2.56896	0	12.4029
beta_lactam__PER-7	0.0324873	0.0125312	2.68954	0	12.3433
beta_lactam__TEM-192	0.0395939	0.0125256	1.99227	0	12.3378
macrolide-lincosamide-streptogramin__vga(B)	0.0243655	0.0122938	4.48651	0	12.1094
aminoglycoside__amrB	0.589848	0.0122675	0.276329	0	12.0835
trimethoprim__dfrA32	0.0111675	0.0122483	3.6101	0	12.0646
tetracycline__tet(37)	0.00812183	0.0122073	4.78065	0	12.0242
beta_lactam__GOB-16	0.117766	0.0120953	0.780796	0	11.9139
aminoglycoside__ANT(3'')-IIa	0.0395939	0.0120612	1.31352	0	11.8803
macrolide-lincosamide-streptogramin__erm(31)	0.0690355	0.0120249	3.04074	0	11.8445
vancomycin__vanYM	0.125888	0.0119493	0.786226	0	11.7701
multidrug__mdtP	0.0558376	0.0118826	2.91832	0	11.7044
aminoglycoside__rmtB	0.00507614	0.0118246	6.08896	0	11.6473
tetracycline__tet(53)	0.138071	0.0117843	0.971548	0	11.6076
aminoglycoside__aadA4	0.0365482	0.0117588	3.09463	0	11.5824
beta_lactam__IDC-2	0.165482	0.0116007	0.474473	0	11.4267
beta_lactam__VEB-9	0.00913706	0.0115761	6.27321	0	11.4024
multidrug__mdtO	0.048731	0.0114201	2.60354	0	11.2488
vancomycin__vanYF	0.138071	0.0113705	0.57719	0	11.2
beta_lactam__LUT-6	0.129949	0.0111321	0.524387	0	10.9652
beta_lactam__LRA-2	0.106599	0.0110863	0.601479	0	10.92
beta_lactam__IDC-1	0.128934	0.0110557	0.75421	0	10.8898
polymyxin__mcr-5.2	0.179695	0.0109372	0.373626	0	10.7731
chloramphenicol__Bacillus pumilus cat86	0.0761421	0.0106976	0.940551	0	10.5371
beta_lactam__PER-3	0.0152284	0.010543	3.44697	0	10.3848
beta_lactam__AST-1	0.120812	0.0104386	1.01378	0	10.282
macrolide-lincosamide-streptogramin__mph(O)	0.0162437	0.0103545	7.12703	0	10.1992
macrolide-lincosamide-streptogramin__mph(C)	0.0121827	0.0103334	6.22266	0	10.1784
beta_lactam__TER-2	0.0964467	0.0102648	0.48635	0	10.1108
beta_lactam__CTX-M-3	0.0263959	0.0101984	2.05513	0	10.0454
chloramphenicol__cmlA4	0.0263959	0.0100896	1.82178	0	9.93828
beta_lactam__CME-1	0.0385787	0.0100538	3.34827	0	9.90295
tetracycline__tet(54)	0.143147	0.0100094	0.477665	0	9.85929
beta_lactam__BPU-1	0.084264	0.00995626	0.981236	0	9.80691
beta_lactam__LRA-8	0.116751	0.00993244	0.545593	0	9.78345
macrolide-lincosamide-streptogramin__msr(A)	0.0152284	0.00982483	4.92072	0	9.67746
quinolone__norA	0.0263959	0.00979882	3.7777	0	9.65184
beta_lactam__OXA-926	0.0507614	0.00967314	0.869828	0	9.52804
macrolide-lincosamide-streptogramin__Erm(52)	0.0172589	0.00960255	1.97536	0	9.45851
quinolone__QnrVC3	0.0182741	0.00955793	1.47169	0	9.41457
beta_lactam__CfxA5	0.0192893	0.00955258	1.33894	0	9.40929
macrolide-lincosamide-streptogramin__msr(C)	0.0233503	0.0094595	2.12678	0	9.31761
beta_lactam__ESP-1	0.106599	0.00944745	0.884213	0	9.30573
beta_lactam__OXA-727	0.0142132	0.00943514	5.18152	0	9.29361
aminoglycoside__APH(9)-Ia	0.109645	0.00936121	0.78533	0	9.2208
polymyxin__mcr-5.1	0.127919	0.00932978	0.493332	0	9.18984
aminoglycoside__AAC(3)-Xa	0.0903553	0.00932851	0.595429	0	9.18858
beta_lactam__TEM-7	0.0365482	0.00932501	1.35784	0	9.18514
beta_lactam__NDM-10	0.00913706	0.00900307	4.68505	0	8.86803
beta_lactam__OXA-29	0.0944162	0.00888032	1.06612	0	8.74711
macrolide-lincosamide-streptogramin__erm(41)	0.0720812	0.0088012	0.637027	0	8.66918
beta_lactam__TEM-162	0.0335025	0.00876531	1.27324	0	8.63383
aminoglycoside__AAC(6')-Ib8	0.0213198	0.00872575	1.47665	0	8.59486
beta_lactam__DHA-1	0.0142132	0.00866958	5.53675	0	8.53954
aminoglycoside__AAC(3)-IIb	0.0730964	0.00847434	0.594565	0	8.34723
trimethoprim__dfrA35	0.013198	0.00846992	3.0811	0	8.34287
chloramphenicol__catD	0.0121827	0.00841556	2.11394	0	8.28933
trimethoprim__dfrK	0.0385787	0.00837644	1.22299	0	8.2508
beta_lactam__OXA-18	0.0345178	0.00837459	0.911706	0	8.24897
trimethoprim__DfrA38	0.0213198	0.00832817	1.70061	0	8.20324
beta_lactam__BcII	0.0812183	0.00828987	0.92583	0	8.16553
aminoglycoside__AAC(3)-VIIIa	0.0812183	0.00812043	0.506433	0	7.99863
aminoglycoside__AAC(3)-IIg	0.0720812	0.00808245	0.651303	0	7.96122
multidrug__mepA	0.0436548	0.00805178	1.85963	0	7.93101
beta_lactam__MYX-1	0.0791878	0.00803966	0.692395	0	7.91906
macrolide-lincosamide-streptogramin__erm(45)	0.0071066	0.00790819	2.71221	0	7.78957
aminoglycoside__AAC(2')-IIa	0.0781726	0.00785793	1.17765	0	7.74006
beta_lactam__CMY-8	0.127919	0.00783884	0.483409	0	7.72126
macrolide-lincosamide-streptogramin__vga(E) Staphylococcus cohnii	0.0477157	0.00782861	1.15306	0	7.71118
macrolide-lincosamide-streptogramin__lsa(A)	0.0203046	0.0078058	3.93966	0	7.68871
tetracycline__tet(50)	0.138071	0.00779649	0.651227	0	7.67955
quinolone__QnrS8	0.0152284	0.00770331	1.39168	0	7.58776
beta_lactam__OXA-53	0.0507614	0.00760802	0.799702	0	7.4939
beta_lactam__DHA-22	0.0152284	0.0076042	4.33601	0	7.49014
aminoglycoside__APH(2'')-Ie	0.0142132	0.00760161	2.50196	0	7.48759
trimethoprim__dfrC	0.0192893	0.00758643	2.88909	0	7.47263
aminoglycoside__AAC(6')-Iad	0.00507614	0.00751179	5.01969	0	7.39912
multidrug__emrY	0.0456853	0.00743161	1.91791	0	7.32013
beta_lactam__OKP-B-4	0.0812183	0.00742195	0.78272	0	7.31062
macrolide-lincosamide-streptogramin__clbB	0.0974619	0.00742166	0.482679	0	7.31034
streptothricin__SatA	0.0649746	0.00734559	0.91753	0	7.2354
aminoglycoside__aadA15	0.0233503	0.00734106	1.05045	0	7.23095
aminoglycoside__AAC(3)-IXa	0.0883249	0.00733308	0.464486	0	7.22309
tetracycline__tet(55)	0.106599	0.00730463	0.403165	0	7.19506
beta_lactam__MOX-8	0.104569	0.00728917	0.669508	0	7.17983
macrolide-lincosamide-streptogramin__VatI	0.0852792	0.00726123	0.493537	0	7.15231
beta_lactam__OXA-119	0.0700508	0.00724611	0.707523	0	7.13742
beta_lactam__MOX-3	0.0649746	0.00722015	1.72458	0	7.11185
beta_lactam__Rhodobacter sphaeroides ampC	0.100508	0.00708597	0.869102	0	6.97968
beta_lactam__OXA-361	0.0071066	0.00707796	2.55708	0	6.97179
beta_lactam__NDM-19	0.00609137	0.00702525	3.09548	0	6.91987
aminoglycoside__AAC(6')-Iak	0.0406091	0.00697312	0.485148	0	6.86852
chloramphenicol__cmlB1	0.0274112	0.00696944	2.52222	0	6.8649
beta_lactam__SPG-1	0.0639594	0.0068897	0.635675	0	6.78636
beta_lactam__NDM-1	0.0071066	0.00686085	3.34646	0	6.75794
beta_lactam__SGM-4	0.0680203	0.00685431	0.723067	0	6.7515
beta_lactam__CfxA3	0.0203046	0.00684848	1.45732	0	6.74575
macrolide-lincosamide-streptogramin__vga(C)	0.0395939	0.00675448	2.35275	0	6.65317
beta_lactam__ACT-29	0.0395939	0.00669154	2.63318	0	6.59117
beta_lactam__OXA-118	0.0730964	0.00660255	0.579204	0	6.50352
vancomycin__vanXD	0.0639594	0.00651734	0.609275	0	6.41958
trimethoprim__dfrB5	0.0142132	0.00651635	1.54916	0	6.41861
trimethoprim__dfrB7	0.0142132	0.00648488	1.39734	0	6.3876
vancomycin__vanZF	0.0822335	0.00648376	0.532995	0	6.38651
beta_lactam__OCH-8	0.0609137	0.00645889	1.04035	0	6.36201
vancomycin__vanXB	0.0477157	0.00645736	0.54822	0	6.3605
quinolone__QnrD1	0.0152284	0.00643664	2.27707	0	6.34009
aminoglycoside__AAC(6')-Ib3	0.0192893	0.00640669	1.03947	0	6.31058
beta_lactam__CGA-1	0.0598985	0.0063827	0.508893	0	6.28696
beta_lactam__DHA-7	0.0111675	0.00633229	3.66893	0	6.2373
macrolide-lincosamide-streptogramin__ere(B)	0.0172589	0.0063289	2.91502	0	6.23397
tetracycline__tet(51)	0.121827	0.00631593	0.402108	0	6.22119
aminoglycoside__AAC(6')-30/AAC(6')-Ib' fusion protein	0.0203046	0.00626446	0.799741	0	6.17049
beta_lactam__CPS-1	0.0436548	0.00619785	0.903968	0	6.10488
aminoglycoside__aadA11	0.0294416	0.0061581	1.1881	0	6.06573
aminoglycoside__AAC(6')-Iz	0.0294416	0.0061524	0.834428	0	6.06011
vancomycin__vanXM	0.0416244	0.00613187	0.455178	0	6.03989
multidrug__adeH	0.237563	0.006117	0.304189	0	6.02524
beta_lactam__OXA-62	0.0101523	0.00610638	1.73988	0	6.01479
vancomycin__vanG	0.0862944	0.00608841	0.335101	0	5.99708
fosfomycin__FosM1	0.0527919	0.00604407	1.28162	0	5.95341
aminoglycoside__sgm	0.0629442	0.00600594	0.720998	0	5.91585
beta_lactam__SPN79-1	0.0324873	0.00590366	0.746231	0	5.81511
beta_lactam__LUT-3	0.0609137	0.0058914	0.974916	0	5.80302
multidrug__pmrA	0.0883249	0.00581143	0.442353	0	5.72425
beta_lactam__MSI-OXA	0.0335025	0.0057746	1.36339	0	5.68798
beta_lactam__ANA-1	0.0649746	0.00572159	0.407307	0	5.63577
beta_lactam__OXA-36	0.0761421	0.00572103	0.344194	0	5.63521
beta_lactam__OXA-363	0.00913706	0.00569631	2.50407	0	5.61087
beta_lactam__OXA-60	0.0416244	0.00568415	1.27158	0	5.59888
beta_lactam__AQU-1	0.0903553	0.00567546	0.483409	0	5.59033
beta_lactam__SGM-6	0.0467005	0.00566405	1.51758	0	5.57909
trimethoprim__dfrA28	0.0142132	0.00562807	1.15101	0	5.54364
quinolone__QnrS2	0.0142132	0.00551169	1.40674	0	5.42902
beta_lactam__DHA-9	0.0101523	0.00549329	3.13527	0	5.41089
beta_lactam__OXA-277	0.00609137	0.00548561	1.9995	0	5.40332
beta_lactam__OXA-20	0.0548223	0.00546196	0.686989	0	5.38003
rifamycin__arr-7	0.0263959	0.00539482	1.58979	0	5.3139
beta_lactam__MOX-7	0.0893401	0.00538864	0.396067	0	5.30781
macrolide-lincosamide-streptogramin__sal(A)	0.0111675	0.00535788	3.02972	0	5.27751
beta_lactam__BCL-1	0.0781726	0.00535315	0.360494	0	5.27285
beta_lactam__MSI-1	0.0548223	0.00534516	0.339549	0	5.26499
beta_lactam__OXA-373	0.0162437	0.00530679	1.5656	0	5.22719
aminoglycoside__aadA6	0.0243655	0.00528451	0.626756	0	5.20524
polymyxin__ICR-Mo	0.0467005	0.00523384	0.46585	0	5.15533
beta_lactam__LEN-6	0.022335	0.00523326	2.29573	0	5.15476
beta_lactam__MOX-2	0.0304569	0.00522375	1.69519	0	5.1454
beta_lactam__SGM-1	0.0598985	0.00521781	0.980773	0	5.13954
beta_lactam__LEN-26	0.0527919	0.00521019	0.767981	0	5.13203
beta_lactam__PEDO-2	0.0558376	0.00519365	0.742346	0	5.11575
beta_lactam__EVM-1	0.0507614	0.00516785	0.526858	0	5.09033
beta_lactam__MOX-4	0.0558376	0.00516519	1.16827	0	5.08771
other_peptide_antibiotics__viomycin phosphotransferase	0.0720812	0.00505454	0.366863	0	4.97872
quinolone__QnrS10	0.0121827	0.00500118	0.874564	0	4.92616
macrolide-lincosamide-streptogramin__vga(A)	0.0751269	0.00495148	0.634056	0	4.87721
beta_lactam__SGM-3	0.048731	0.00493699	1.0589	0	4.86293
beta_lactam__VEB-5	0.00507614	0.00487108	3.47517	0	4.79801
tetracycline__Corynebacterium striatum tetA	0.0152284	0.00486886	1.38415	0	4.79583
beta_lactam__PST-2	0.00913706	0.00484591	1.55966	0	4.77322
quinolone__QnrS5	0.0111675	0.00484146	1.20104	0	4.76884
aminoglycoside__AAC(3)-IIa	0.0243655	0.00480251	1.5299	0	4.73047
vancomycin__vanYG1	0.0111675	0.00474462	1.45733	0	4.67346
beta_lactam__OXA-278	0.00812183	0.0046987	1.1997	0	4.62822
beta_lactam__VEB-7	0.00812183	0.00469069	3.32408	0	4.62033
macrolide-lincosamide-streptogramin__mph(L)	0.057868	0.00463737	0.737346	0	4.56781
multidrug__Acinetobacter baumannii AmvA	0.048731	0.00459846	0.816009	0	4.52948
beta_lactam__CfxA4	0.0142132	0.00458998	0.882845	0	4.52113
beta_lactam__FAR-1	0.0477157	0.00454192	0.61284	0	4.47379
chloramphenicol__catII from Escherichia coli K-12	0.00812183	0.00448171	1.19726	0	4.41448
tetracycline__tet(38)	0.0304569	0.00446868	1.36834	0	4.40165
tetracycline__tet(45)	0.0456853	0.00445059	1.88611	0	4.38383
aminoglycoside__AAC(3)-VIa	0.0375635	0.0044479	0.495879	0	4.38118
macrolide-lincosamide-streptogramin__clbC	0.0416244	0.00438257	1.87163	0	4.31683
trimethoprim__dfrA26	0.0172589	0.00437553	0.863434	0	4.3099
quinolone__QnrS6	0.0121827	0.00437184	1.51495	0	4.30626
beta_lactam__Other class A beta-lactamase	0.0274112	0.00430085	0.862875	0	4.23634
beta_lactam__CMY-19	0.0923858	0.00425113	0.336388	0	4.18736
tetracycline__tet(E)	0.0111675	0.00423842	1.24557	0	4.17484
quinolone__QnrS7	0.0142132	0.00422124	0.695842	0	4.15792
beta_lactam__EBR-1	0.0101523	0.00418351	1.11468	0	4.12076
beta_lactam__CARB-4	0.0142132	0.00418078	1.07672	0	4.11807
aminoglycoside__AAC(3)-IIIa	0.0365482	0.00416441	0.535303	0	4.10194
chloramphenicol__Enterococcus faecium chloramphenicol acetyltransferase	0.00507614	0.00413232	1.69006	0	4.07034
macrolide-lincosamide-streptogramin__vat(A)	0.035533	0.00413058	0.771513	0	4.06863
beta_lactam__OXA-164	0.00507614	0.0041194	2.70881	0	4.05761
macrolide-lincosamide-streptogramin__erm(D)	0.0324873	0.00410864	1.95299	0	4.04701
macrolide-lincosamide-streptogramin__mph(H)	0.0172589	0.00405522	1.34878	0	3.99439
aminoglycoside__AAC(6')-Ian	0.0101523	0.00403707	1.25431	0	3.97651
aminoglycoside__AAC(6')-Ic	0.00913706	0.00402835	1.31769	0	3.96792
pleuromutilin_tiamulin__msr(I)	0.0680203	0.00401045	0.582066	0	3.95029
beta_lactam__SGM-5	0.0456853	0.00399846	0.89675	0	3.93848
tetracycline__otr(B)	0.0456853	0.00399414	1.97846	0	3.93423
macrolide-lincosamide-streptogramin__mph(N)	0.0426396	0.00394698	0.542248	0	3.88778
aminoglycoside__APH(3')-IIb	0.0517766	0.00392497	0.35184	0	3.8661
beta_lactam__DHA-20	0.00913706	0.00389338	2.13465	0	3.83498
beta_lactam__OXA-284	0.0101523	0.00388298	1.72231	0	3.82474
beta_lactam__OXA-129	0.0243655	0.00386923	1.34641	0	3.81119
beta_lactam__NDM-2	0.0071066	0.00386016	1.17126	0	3.80225
aminoglycoside__AAC(6')-Ia	0.00507614	0.00382559	1.76752	0	3.7682
beta_lactam__OXA-282	0.00609137	0.00381061	2.7628	0	3.75345
beta_lactam__OXA-362	0.00812183	0.00374149	1.34711	0	3.68537
beta_lactam__OXA-152	0.00507614	0.00373748	1.54656	0	3.68142
vancomycin__vanHM	0.0436548	0.00370614	0.577198	0	3.65055
beta_lactam__OXA-283	0.0071066	0.00364962	2.41773	0	3.59487
beta_lactam__OXA-275	0.013198	0.00364616	0.889785	0	3.59147
beta_lactam__R39 beta-lactamase	0.0477157	0.00364357	0.367817	0	3.58891
beta_lactam__SHV-41	0.0446701	0.00364192	0.381353	0	3.58729
multidrug__lmrP	0.0142132	0.0036356	1.11039	0	3.58107
aminoglycoside__amrA	0.0913706	0.00362463	0.391303	0	3.57026
beta_lactam__SRT-2	0.0213198	0.00355342	0.980399	0	3.50012
beta_lactam__TLA-2	0.0538071	0.00354677	0.522141	0	3.49357
beta_lactam__Sed1 beta-lactamase	0.0365482	0.00351602	0.379385	0	3.46328
fosfomycin__FosA7	0.022335	0.00350456	0.596701	0	3.45199
multidrug__Staphylococcys aureus LmrS	0.0162437	0.00350243	1.19824	0	3.4499
beta_lactam__LAP-2	0.0121827	0.00346992	1.15323	0	3.41787
multidrug__ykkD	0.0416244	0.0034411	0.740156	0	3.38948
aminoglycoside__ANT(3'')-IIc	0.00913706	0.00343805	1.17138	0	3.38648
beta_lactam__OXA-33	0.0162437	0.00342515	0.821708	0	3.37378
macrolide-lincosamide-streptogramin__erm(S)	0.057868	0.00342403	0.393879	0	3.37266
macrolide-lincosamide-streptogramin__erm(W)	0.0456853	0.00342066	0.298105	0	3.36935
macrolide-lincosamide-streptogramin__msr(F)	0.0609137	0.00341364	0.273453	0	3.36244
beta_lactam__CTX-M-123	0.0121827	0.00338714	0.989506	0	3.33634
beta_lactam__LCR-1	0.0152284	0.00338404	1.01514	0	3.33328
beta_lactam__VEB-4	0.00406091	0.00336656	2.49306	0	3.31606
tetracycline__tetA	0.035533	0.00335911	0.536976	0	3.30873
beta_lactam__OXA-34	0.0375635	0.00333803	0.380249	0	3.28795
aminoglycoside__AAC(2')-Id	0.0263959	0.00333613	0.621527	0	3.28609
macrolide-lincosamide-streptogramin__erm(O)-lrm	0.0385787	0.00331673	0.358863	0	3.26698
beta_lactam__EFM-1	0.0548223	0.0033034	0.370192	0	3.25385
beta_lactam__SPM-1	0.0365482	0.00327765	0.919275	0	3.22849
beta_lactam__OXA-211	0.0182741	0.00325524	0.869777	0	3.20641
tetracycline__tet(48)	0.0456853	0.00325165	0.594554	0	3.20288
beta_lactam__SGM-2	0.0477157	0.00324506	0.446082	0	3.19638
beta_lactam__BcI	0.0639594	0.00324465	0.239884	0	3.19598
beta_lactam__LUT-4	0.0436548	0.00321629	0.576363	0	3.16804
beta_lactam__NPS-1	0.013198	0.00320995	1.55824	0	3.1618
aminoglycoside__AAC(6')-Ig	0.0071066	0.00319759	1.38671	0	3.14963
multidrug__ParS	0.0406091	0.00313962	0.469795	0	3.09253
quinolone__QnrE1	0.0233503	0.0031201	0.523032	0	3.0733
multidrug__ceoA	0.0294416	0.00311208	0.953936	0	3.0654
beta_lactam__GIL-1	0.0253807	0.00310259	0.985985	0	3.05605
beta_lactam__PER-4	0.0071066	0.00308792	1.27399	0	3.0416
polymyxin__mcr-8.1	0.0517766	0.00305443	0.336232	0	3.00861
beta_lactam__TEM-118	0.0182741	0.00301864	0.519279	0	2.97337
beta_lactam__PER-2	0.0182741	0.00300903	0.627	0	2.9639
beta_lactam__OXA-372	0.00507614	0.00295216	2.03421	0	2.90788
macrolide-lincosamide-streptogramin__chrB	0.0324873	0.00294329	0.367869	0	2.89914
beta_lactam__VEB-8	0.0071066	0.00293329	1.35985	0	2.88929
beta_lactam__TEM-187	0.0203046	0.00291499	0.398483	0	2.87126
beta_lactam__CTX-M-108	0.0101523	0.00289681	0.848943	0	2.85336
beta_lactam__OXA-443	0.0263959	0.00288954	0.608656	0	2.8462
quinolone__sdrM	0.013198	0.0028818	0.862844	0	2.83857
beta_lactam__OXA-198	0.0345178	0.00286897	0.779459	0	2.82593
quinolone__QnrS15	0.00913706	0.00285927	0.927789	0	2.81638
beta_lactam__TEM-63	0.0162437	0.00283119	0.520138	0	2.78872
beta_lactam__LRA-18	0.0467005	0.00282693	0.38681	0	2.78452
multidrug__ykkC	0.0335025	0.00280877	0.335841	0	2.76664
beta_lactam__CTX-M-55	0.0101523	0.00280299	0.837274	0	2.76094
beta_lactam__NDM-5	0.00812183	0.00276887	0.836616	0	2.72733
polymyxin__mcr-9.1	0.0436548	0.00276617	0.527387	0	2.72468
multidrug__mdsC	0.146193	0.00273583	0.104426	0	2.6948
beta_lactam__OXA-335	0.00406091	0.00273542	1.57133	0	2.69439
beta_lactam__OXA-246	0.00609137	0.00272959	1.61369	0	2.68865
tetracycline__tetA(60)	0.0670051	0.00269745	0.978905	0	2.65699
beta_lactam__OXA-205	0.0365482	0.0026864	0.353237	0	2.6461
beta_lactam__OXA-212	0.013198	0.00257521	1.30466	0	2.53658
beta_lactam__OXA-457	0.0142132	0.00257091	0.464925	0	2.53234
beta_lactam__OXA-37	0.0314721	0.00254552	0.373723	0	2.50734
fosfomycin__FosA6	0.0142132	0.002542	0.857262	0	2.50387
macrolide-lincosamide-streptogramin__mef(D)	0.0385787	0.00254115	0.39175	0	2.50303
beta_lactam__LRA-13	0.0568528	0.00252934	0.201861	0	2.4914
multidrug__mexV	0.0507614	0.00252016	0.410068	0	2.48236
fusidic_acid__fusH	0.0294416	0.00251144	0.27346	0	2.47377
chloramphenicol__cmlA1	0.0213198	0.00250309	0.455309	0	2.46554
beta_lactam__ACC-1	0.0345178	0.00248245	0.309833	0	2.44521
beta_lactam__MIR-23	0.0213198	0.00242764	0.675821	0	2.39122
chloramphenicol__Clostridium butyricum catB	0.0304569	0.00240723	0.429011	0	2.37112
beta_lactam__VEB-3	0.0101523	0.00240225	0.676448	0	2.36621
chloramphenicol__Vibrio anguillarum chloramphenicol acetyltransferase	0.00812183	0.00236052	0.706464	0	2.32512
aminoglycoside__AAC(6')-Iih	0.0111675	0.00235681	0.603129	0	2.32146
beta_lactam__y56	0.0375635	0.00235574	0.243481	0	2.32041
quinolone__QnrB30	0.013198	0.00233897	0.621852	0	2.30388
beta_lactam__NDM-3	0.00406091	0.00233833	0.920277	0	2.30325
trimethoprim__DfrA39	0.00406091	0.00233579	0.962006	0	2.30075
beta_lactam__LUT-5	0.0456853	0.00233023	0.581151	0	2.29528
beta_lactam__CIA-3	0.00812183	0.00227613	1.28905	0	2.24199
beta_lactam__OXA-417	0.0111675	0.00225584	0.490203	0	2.222
bicyclomycin__bcr-1	0.0243655	0.00224994	0.581842	0	2.21619
multidrug__mefJ	0.0365482	0.00223703	0.297102	0	2.20348
beta_lactam__OXA-147	0.0233503	0.00223524	0.353762	0	2.20171
beta_lactam__SHV-53	0.00913706	0.00220995	0.886309	0	2.1768
macrolide-lincosamide-streptogramin__vga(D)	0.048731	0.00220825	0.258156	0	2.17512
beta_lactam__CTX-M-27	0.0162437	0.00220705	0.434403	0	2.17394
beta_lactam__ECV-1	0.00913706	0.0021992	0.775671	0	2.16622
tetracycline__tet(52)	0.057868	0.00219228	0.24968	0	2.1594
beta_lactam__DHA-6	0.00609137	0.00216784	1.40086	0	2.13532
beta_lactam__MOX-9	0.0213198	0.00216261	0.622242	0	2.13017
tetracycline__tcr3	0.0365482	0.00214468	0.206721	0	2.11251
beta_lactam__TEM-87	0.0233503	0.0021294	0.23234	0	2.09746
beta_lactam__CTX-M-132	0.00913706	0.00211012	0.989506	0	2.07847
fosfomycin__FomB	0.0335025	0.00208671	0.249017	0	2.05541
multidrug__bpeE	0.0629442	0.00207339	0.277422	0	2.04229
beta_lactam__BAT-1	0.0243655	0.00206061	0.688432	0	2.02971
aminoglycoside__AAC(3)-Ib/AAC(6')-Ib''	0.0284264	0.00203939	0.232868	0	2.0088
beta_lactam__TEM-12	0.0152284	0.00202675	0.578877	0	1.99635
aminoglycoside__ANT(4')-IIb	0.00609137	0.00201658	0.617721	0	1.98633
beta_lactam__OCH-3	0.048731	0.00201221	0.156774	0	1.98203
aminoglycoside__APH(2'')-IVa	0.0071066	0.00198958	0.796658	0	1.95973
beta_lactam__HMB-1	0.013198	0.00197294	0.524528	0	1.94335
beta_lactam__AXC-2	0.0152284	0.0019624	0.566984	0	1.93297
beta_lactam__ELM-1	0.0162437	0.0019616	0.305006	0	1.93218
streptothricin__SAT-3	0.0162437	0.00194178	0.314487	0	1.91265
quinolone__QnrS9	0.0071066	0.00193357	0.599985	0	1.90457
vancomycin__vanKI	0.0527919	0.00192779	0.293846	0	1.89888
beta_lactam__OXA-134	0.00609137	0.00192681	0.808591	0	1.89791
polymyxin__mcr-10.1	0.0294416	0.0019145	0.274089	0	1.88579
beta_lactam__DIM-1	0.00406091	0.00191273	1.50415	0	1.88404
beta_lactam__TEM-205	0.0182741	0.00190697	0.317672	0	1.87837
beta_lactam__CMY-11	0.0192893	0.00189616	0.425502	0	1.86772
beta_lactam__ACT-12	0.00812183	0.00189147	0.975044	0	1.8631
beta_lactam__OXA-728	0.00507614	0.00188513	0.893366	0	1.85685
beta_lactam__TEM-178	0.0182741	0.00188192	0.179207	0	1.85369
multidrug__mexP	0.0700508	0.00188134	0.168887	0	1.85312
beta_lactam__CfxA	0.0121827	0.00187398	0.436879	0	1.84587
polymyxin__mcr-1.4	0.00812183	0.00186845	0.607522	0	1.84043
macrolide-lincosamide-streptogramin__mph(M)	0.0233503	0.00186607	0.244826	0	1.83808
beta_lactam__FOX-2	0.0375635	0.0018531	0.275757	0	1.8253
aminoglycoside__AAC(6')-33	0.00609137	0.00184826	1.09278	0	1.82053
aminoglycoside__AAC(6')-Ii	0.00609137	0.001842	1.2158	0	1.81437
beta_lactam__OXA-96	0.00609137	0.00183461	0.902938	0	1.80709
beta_lactam__OXA-5	0.022335	0.00182586	0.362026	0	1.79847
chloramphenicol__Bacillus clausii chloramphenicol acetyltransferase	0.0365482	0.00182557	0.125917	0	1.79819
beta_lactam__RCP-1	0.00812183	0.00182141	0.517725	0	1.79409
quinolone__QnrS3	0.00913706	0.0018204	0.312285	0	1.79309
quinolone__QnrS1	0.00406091	0.00180802	1.21247	0	1.7809
defensin__Bacillus subtilis mprF	0.0852792	0.00180759	0.109788	0	1.78048
beta_lactam__CepS	0.0294416	0.00180273	0.550751	0	1.77569
macrolide-lincosamide-streptogramin__vat(C)	0.0213198	0.00179894	0.556366	0	1.77195
beta_lactam__FOX-7	0.0335025	0.00179185	0.262679	0	1.76497
beta_lactam__RSA2-1	0.0162437	0.00176607	0.461262	0	1.73958
beta_lactam__CTX-M-15	0.0101523	0.00176515	0.573275	0	1.73867
aminoglycoside__ANT(4')-Ia	0.0365482	0.00175955	0.209537	0	1.73316
aminoglycoside__AAC(6')-34	0.0172589	0.00175491	0.444033	0	1.72859
beta_lactam__MAB	0.013198	0.00175256	0.316939	0	1.72627
beta_lactam__cphA6	0.0111675	0.00173739	0.448381	0	1.71133
vancomycin__vanH_in_vanP_cl	0.0142132	0.00172141	0.667533	0	1.69558
aminoglycoside__APH(3')-Vc	0.0142132	0.0017213	0.684527	0	1.69549
beta_lactam__CGB-1	0.0121827	0.00171445	0.4279	0	1.68874
multidrug__patA	0.0304569	0.00170881	0.306725	0	1.68318
beta_lactam__BSU-1	0.022335	0.00169586	0.565802	0	1.67042
beta_lactam__OXA-360	0.00812183	0.00169407	0.679428	0	1.66865
beta_lactam__GOB-6	0.0192893	0.00168516	0.246691	0	1.65988
polymyxin__mcr-1.5	0.00609137	0.0016807	0.795577	0	1.65549
macrolide-lincosamide-streptogramin__clbA	0.0385787	0.00168008	0.225978	0	1.65488
beta_lactam__OXA-114a	0.0121827	0.00167952	0.602103	0	1.65433
beta_lactam__OXA-45	0.0071066	0.00166527	1.07227	0	1.64029
beta_lactam__SHV-22	0.0152284	0.00166222	0.518947	0	1.63728
multidrug__mdsA	0.0314721	0.00166147	0.244508	0	1.63655
polymyxin__mcr-1.9	0.0071066	0.00165819	0.668055	0	1.63332
beta_lactam__OXA-151	0.00609137	0.00165183	0.57996	0	1.62705
multidrug__opmD	0.0375635	0.00162051	0.200166	0	1.5962
beta_lactam__CVI-1	0.0111675	0.00160961	0.617203	0	1.58546
beta_lactam__CAM-1	0.022335	0.00159064	0.22961	0	1.56678
polymyxin__mcr-4.4	0.0335025	0.00156993	0.342577	0	1.54638
beta_lactam__ACT-6	0.0162437	0.00156284	0.853407	0	1.5394
beta_lactam__CTX-M-117	0.00913706	0.00156096	0.456695	0	1.53755
multidrug__opmE	0.0730964	0.00155733	0.142077	0	1.53397
multidrug__mtrE	0.084264	0.00154342	0.0846201	0	1.52027
beta_lactam__LUS-1	0.0274112	0.00153396	0.465154	0	1.51095
beta_lactam__DHA-19	0.0071066	0.00151464	0.667078	0	1.49192
fosfomycin__FosA5	0.00913706	0.0015088	0.342905	0	1.48617
beta_lactam__ERP-1	0.0121827	0.00150555	0.673819	0	1.48296
macrolide-lincosamide-streptogramin__vat(D)	0.013198	0.00149879	0.425351	0	1.47631
beta_lactam__FIA-1	0.022335	0.00149126	0.197479	0	1.46889
polymyxin__mcr-3.5	0.0324873	0.0014893	0.247974	0	1.46696
beta_lactam__OXA-551	0.0071066	0.00148644	0.847558	0	1.46414
beta_lactam__ACI-1	0.00609137	0.00147517	0.541199	0	1.45304
beta_lactam__SHV-39	0.00203046	0.00146658	1.25431	0	1.44458
aminoglycoside__armA	0.00507614	0.00145918	0.508937	0	1.43729
quinolone__QnrS4	0.00609137	0.00145261	0.387526	0	1.43082
beta_lactam__OXA-488	0.0111675	0.00143113	0.612697	0	1.40966
chloramphenicol__Staphylococcus intermedius chloramphenicol acetyltransferase	0.00507614	0.00142407	1.01393	0	1.40271
beta_lactam__CTX-M-137	0.00406091	0.00142282	0.91339	0	1.40148
aminoglycoside__AAC(2')-IIb	0.0152284	0.00141718	0.519106	0	1.39592
quinolone__QnrE2	0.0101523	0.00141396	0.451427	0	1.39275
beta_lactam__OXA-251	0.00507614	0.00140912	0.709471	0	1.38798
multidrug__patB	0.0395939	0.001403	0.435382	0	1.38195
beta_lactam__OXA-919	0.0152284	0.00139975	0.613439	0	1.37875
beta_lactam__VMB-1	0.00507614	0.0013889	0.456726	0	1.36806
beta_lactam__YEM-1	0.00507614	0.00138	0.685755	0	1.3593
beta_lactam__ARL-6	0.00507614	0.00137689	1.09963	0	1.35624
aminoglycoside__AAC(6')-Ik	0.0111675	0.00137258	0.277862	0	1.352
beta_lactam__PER-6	0.0142132	0.00137186	0.305186	0	1.35128
beta_lactam__ACT-30	0.0203046	0.00136826	0.297135	0	1.34774
beta_lactam__ACT-17	0.0172589	0.00135956	0.482363	0	1.33917
beta_lactam__NDM-7	0.00507614	0.00135614	0.585631	0	1.3358
fosfomycin__FosA2	0.00304569	0.00135226	0.764204	0	1.33198
beta_lactam__CMY-9	0.022335	0.00134489	0.367636	0	1.32472
beta_lactam__OXA-837	0.0162437	0.00134239	0.362443	0	1.32225
beta_lactam__NDM-15	0.00507614	0.00133848	0.669293	0	1.3184
aminoglycoside__AAC(6')-Iw	0.00203046	0.00133295	1.21033	0	1.31296
quinolone__QnrD2	0.0071066	0.00133197	0.62102	0	1.31199
tunicamycin__tmrB	0.0172589	0.00133167	0.228764	0	1.31169
beta_lactam__OXA-285	0.00406091	0.00132272	0.94425	0	1.30288
beta_lactam__CTX-M-14	0.00913706	0.00131653	0.304463	0	1.29679
polymyxin__mcr-1.6	0.00609137	0.00128174	0.514057	0	1.26252
beta_lactam__OXA-12	0.0192893	0.00127887	0.191532	0	1.25968
beta_lactam__CTX-M-45	0.00507614	0.00127506	0.613141	0	1.25593
beta_lactam__OXA-236	0.00406091	0.00126295	0.799802	0	1.24401
beta_lactam__OXA-97	0.00304569	0.00125857	0.993231	0	1.23969
macrolide-lincosamide-streptogramin__mph(I)	0.0152284	0.00125072	0.32922	0	1.23196
beta_lactam__OCH-2	0.0142132	0.00124765	0.514714	0	1.22894
beta_lactam__OXA-281	0.00913706	0.00124052	0.456258	0	1.22192
beta_lactam__TEM-184	0.00812183	0.00122882	0.385918	0	1.21038
beta_lactam__OXA-237	0.0071066	0.0012241	0.458012	0	1.20574
beta_lactam__OXA-570	0.0111675	0.00121705	0.374107	0	1.1988
multidrug__mexG	0.0568528	0.00120498	0.12463	0	1.18691
beta_lactam__SHV-32	0.00304569	0.00120429	0.943541	0	1.18622
beta_lactam__LEN-11	0.00913706	0.00120015	0.335412	0	1.18215
macrolide-lincosamide-streptogramin__lsa(D)	0.013198	0.00119814	0.431563	0	1.18017
polymyxin__mcr-4.5	0.022335	0.00118821	0.462162	0	1.17039
beta_lactam__CTX-M-64	0.00812183	0.00118662	0.456695	0	1.16882
trimethoprim__dfrA7	0.0071066	0.00118464	0.4698	0	1.16687
aminoglycoside__AAC(6')-29a	0.00101523	0.00117605	1.15841	0	1.15841
aminoglycoside__AAC(6')-29b	0.00101523	0.00117605	1.15841	0	1.15841
polymyxin__mcr-7.1	0.0213198	0.0011735	0.235028	0	1.1559
beta_lactam__CTX-M-109	0.00609137	0.00117201	0.413748	0	1.15443
beta_lactam__ACT-10	0.0101523	0.00116885	0.351248	0	1.15131
beta_lactam__VIM-5	0.00203046	0.00116484	1.11997	0	1.14737
beta_lactam__PER-5	0.00609137	0.00116273	0.344989	0	1.14529
beta_lactam__CBP-1	0.0253807	0.00115091	0.163133	0	1.13364
polymyxin__mcr-1.10	0.0111675	0.00113902	0.322358	0	1.12194
vancomycin__vanHD	0.0121827	0.00112672	0.355251	0	1.10982
aminoglycoside__ANT(3'')-IIb	0.0071066	0.00112149	0.576781	0	1.10467
beta_lactam__CMY-1	0.0324873	0.00111247	0.197734	0	1.09578
beta_lactam__TEM-185	0.0142132	0.0011104	0.249985	0	1.09374
beta_lactam__NDM-14	0.00406091	0.00110766	0.423008	0	1.09105
trimethoprim__dfrA18	0.0071066	0.00110754	0.536492	0	1.09093
beta_lactam__IMP-8	0.0142132	0.00110284	0.351108	0	1.0863
beta_lactam__SIM-1	0.00812183	0.0011015	0.395205	0	1.08497
beta_lactam__MIR-6	0.0101523	0.00107552	0.337911	0	1.05939
aminoglycoside__AAC(6')-Iag	0.0111675	0.00106421	0.377244	0	1.04825
beta_lactam__CTX-M-122	0.00507614	0.00105256	0.351877	0	1.03677
quinolone__QnrVC7	0.00203046	0.00104964	0.59661	0	1.03389
aminoglycoside__AAC(6')-Iai	0.00203046	0.00104859	0.6724	0	1.03286
beta_lactam__ADC-15	0.00812183	0.00104462	0.349414	0	1.02895
beta_lactam__CRH-1	0.00203046	0.00103942	0.712962	0	1.02383
polymyxin__mcr-4.1	0.0111675	0.00103935	0.462162	0	1.02376
beta_lactam__OXA-334	0.0071066	0.00103558	0.521866	0	1.02004
bacitracin__bcrB	0.0101523	0.00102816	0.319467	0	1.01274
beta_lactam__CTX-M-30	0.00406091	0.00102542	0.616589	0	1.01004
beta_lactam__PME-1	0.00812183	0.00102406	0.756959	0	1.00869
macrolide-lincosamide-streptogramin__erm(H)	0.00507614	0.00102392	0.392648	0	1.00856
multidrug__Pseudomonas aeruginosa emrE	0.00304569	0.00101898	0.464245	0	1.0037
beta_lactam__SCO-1	0.0071066	0.00100903	0.259216	0	0.99389
beta_lactam__FOX-5	0.0162437	0.00100873	0.151573	0	0.993599
beta_lactam__CTX-M-99	0.00304569	0.00100306	0.380579	0	0.988013
chloramphenicol__pexA	0.0162437	0.000995564	0.199429	0	0.980631
beta_lactam__cepA	0.00913706	0.000994085	0.301182	0	0.979174
beta_lactam__OCH-4	0.0172589	0.000991343	0.153476	0	0.976473
beta_lactam__OXA-85	0.00507614	0.000990391	0.368079	0	0.975536
trimethoprim__dfrA21	0.00406091	0.000987769	0.623676	0	0.972952
beta_lactam__DHA-13	0.00609137	0.000981771	0.377286	0	0.967045
beta_lactam__cphA7	0.00812183	0.000981236	0.307606	0	0.966518
beta_lactam__OXA-464	0.00406091	0.000977129	0.376789	0	0.962472
beta_lactam__CARB-19	0.00304569	0.000969279	0.789497	0	0.954739
beta_lactam__GOB-13	0.00913706	0.00096624	0.215804	0	0.951747
beta_lactam__OXA-552	0.00304569	0.000962051	0.862171	0	0.94762
beta_lactam__OXA-13	0.0101523	0.00095354	0.386136	0	0.939237
beta_lactam__cphA2	0.00812183	0.000935827	0.247065	0	0.92179
quinolone__QnrVC4	0.00406091	0.000931312	0.497175	0	0.917342
beta_lactam__Other class C beta-lactamase	0.00913706	0.000929143	0.23501	0	0.915206
beta_lactam__ACT-27	0.00406091	0.000920894	0.426516	0	0.90708
beta_lactam__VIM-13	0.00913706	0.000918682	0.258455	0	0.904902
macrolide-lincosamide-streptogramin__erm(34)	0.00913706	0.000916563	0.368512	0	0.902815
beta_lactam__IMP-9	0.00203046	0.000916498	0.810963	0	0.90275
beta_lactam__RSD2-2	0.00406091	0.000904981	0.702285	0	0.891406
beta_lactam__IMP-18	0.0071066	0.000893014	0.289767	0	0.879619
beta_lactam__OXA-103	0.00101523	0.000886082	0.872791	0	0.872791
beta_lactam__OXA-569	0.0071066	0.000883965	0.394955	0	0.870706
beta_lactam__ARL-3	0.00203046	0.000877801	0.78545	0	0.864634
beta_lactam__ARL-1	0.00304569	0.00087654	0.706905	0	0.863392
beta_lactam__OXA-46	0.00913706	0.000873164	0.339952	0	0.860066
beta_lactam__GOB-36	0.00913706	0.000872775	0.293991	0	0.859683
beta_lactam__VIM-2	0.00507614	0.000867919	0.344607	0	0.8549
multidrug__qacG	0.00304569	0.00086717	0.417379	0	0.854163
beta_lactam__IMP-37	0.00812183	0.000865019	0.192313	0	0.852044
beta_lactam__DHA-12	0.00609137	0.000864229	0.466955	0	0.851266
beta_lactam__CRH-2	0.0071066	0.00086377	0.475308	0	0.850814
polymyxin__ICR-Mc	0.0172589	0.000861495	0.14121	0	0.848573
beta_lactam__DHA-17	0.00609137	0.000855396	0.533662	0	0.842565
beta_lactam__CTX-M-107	0.0071066	0.00085353	0.246585	0	0.840727
beta_lactam__ADC-25	0.00406091	0.000852759	0.609115	0	0.839967
fosfomycin__FomA	0.0111675	0.000851706	0.428385	0	0.83893
chloramphenicol__CatU	0.0101523	0.000847733	0.258304	0	0.835017
beta_lactam__OXA-142	0.00609137	0.000831014	0.285138	0	0.818549
beta_lactam__VIM-29	0.00609137	0.000823432	0.430759	0	0.811081
beta_lactam__TEM-95	0.00609137	0.00081809	0.437114	0	0.805819
beta_lactam__TEM-75	0.00812183	0.000815065	0.339459	0	0.802839
beta_lactam__OXA-47	0.00812183	0.000813215	0.226476	0	0.801017
beta_lactam__CMY-10	0.00913706	0.000802434	0.483409	0	0.790398
aminoglycoside__APH(7'')-Ia	0.0142132	0.000800201	0.13992	0	0.788198
multidrug__mexH	0.0172589	0.000799132	0.485482	0	0.787145
beta_lactam__OKP-B-12	0.0101523	0.000788435	0.280189	0	0.776609
beta_lactam__POM-1	0.0142132	0.000787536	0.0846963	0	0.775723
beta_lactam__OXA-15	0.00507614	0.000783043	0.231833	0	0.771298
quinolone__QnrB32	0.00507614	0.000775759	0.321464	0	0.764122
beta_lactam__GOB-11	0.00812183	0.000774323	0.232897	0	0.762708
beta_lactam__CTX-M-147	0.00304569	0.000769393	0.380579	0	0.757852
beta_lactam__HERA-1	0.00609137	0.000767679	0.328716	0	0.756163
beta_lactam__TEM-136	0.00913706	0.00076286	0.176799	0	0.751417
polymyxin__mcr-1.11	0.00609137	0.000762217	0.37317	0	0.750783
beta_lactam__OXA-420	0.00304569	0.000761161	0.484042	0	0.749743
trimethoprim__DfrA43_TMP	0.00304569	0.000751046	0.478236	0	0.73978
beta_lactam__DHA-21	0.0071066	0.000748049	0.266831	0	0.736828
beta_lactam__SPR-1	0.00101523	0.000742666	0.731526	0	0.731526
beta_lactam__ADC-68	0.00609137	0.000741988	0.268822	0	0.730858
beta_lactam__OXA-573	0.00913706	0.000736656	0.41113	0	0.725606
beta_lactam__DHA-15	0.00304569	0.000730846	0.533662	0	0.719884
beta_lactam__TEM-6	0.00609137	0.000730016	0.218557	0	0.719066
beta_lactam__OXA-324	0.00304569	0.000725131	0.436481	0	0.714254
beta_lactam__OXA-57	0.00101523	0.000721841	0.711014	0	0.711014
beta_lactam__SHV-1	0.013198	0.000718777	0.102424	0	0.707996
beta_lactam__OXA-300	0.00203046	0.000717304	0.431737	0	0.706544
polymyxin__mcr-1.7	0.00609137	0.000702345	0.280395	0	0.69181
polymyxin__mcr-1.8	0.00812183	0.00070036	0.167014	0	0.689855
macrolide-lincosamide-streptogramin__msr(H)	0.0182741	0.000699185	0.188468	0	0.688697
beta_lactam__CTX-M-160	0.00609137	0.000699118	0.228347	0	0.688631
beta_lactam__SHV-156	0.00304569	0.000696095	0.643931	0	0.685654
beta_lactam__OXA-550	0.00203046	0.000694554	0.646628	0	0.684136
aminoglycoside__APH(9)-Ib	0.0142132	0.000687603	0.133594	0	0.677289
trimethoprim__dfrA24	0.00101523	0.000686046	0.675755	0	0.675755
beta_lactam__TEM-127	0.0071066	0.000684714	0.176799	0	0.674443
beta_lactam__ACT-22	0.0111675	0.000682683	0.195009	0	0.672443
beta_lactam__ADC-8	0.0111675	0.000679893	0.158615	0	0.669695
beta_lactam__IMP-14	0.0071066	0.000676679	0.243721	0	0.666529
beta_lactam__CTX-M-6	0.00609137	0.000676357	0.29737	0	0.666212
beta_lactam__DHA-14	0.00304569	0.000667589	0.533662	0	0.657575
beta_lactam__OXA-226	0.0121827	0.000665431	0.2273	0	0.65545
beta_lactam__ARL-5	0.00304569	0.000662108	0.47127	0	0.652177
multidrug__salD	0.00203046	0.00066129	0.610745	0	0.65137
beta_lactam__CTX-M-53	0.00507614	0.000659139	0.228347	0	0.649252
beta_lactam__IMP-19	0.0071066	0.000658981	0.245599	0	0.649096
beta_lactam__GOB-2	0.00507614	0.000657387	0.465053	0	0.647526
macrolide-lincosamide-streptogramin__mph(K)	0.00913706	0.00064642	0.158363	0	0.636724
beta_lactam__PDC-8	0.0071066	0.00064275	0.225744	0	0.633108
beta_lactam__PDC-5	0.0071066	0.000641671	0.470909	0	0.632046
beta_lactam__TER-1	0.0071066	0.000639604	0.22255	0	0.63001
beta_lactam__SPU-1	0.00406091	0.000639419	0.213336	0	0.629827
beta_lactam__OXA-364	0.00812183	0.000639322	0.163547	0	0.629732
beta_lactam__KPC-3	0.00913706	0.00063432	0.186021	0	0.624805
beta_lactam__OXA-276	0.00203046	0.000632918	0.452952	0	0.623424
beta_lactam__mecB	0.00406091	0.000632101	0.327515	0	0.62262
beta_lactam__LAP-1	0.0071066	0.000624929	0.146558	0	0.615555
beta_lactam__LUT-2	0.0101523	0.000621881	0.249184	0	0.612553
trimethoprim__dfrA10	0.00304569	0.000616571	0.255046	0	0.607323
beta_lactam__IND-3	0.0071066	0.000614833	0.229752	0	0.60561
chloramphenicol__cmlB	0.0121827	0.00061283	0.109192	0	0.603638
beta_lactam__CAR-1	0.00913706	0.000612694	0.243873	0	0.603504
beta_lactam__CMY-34	0.00609137	0.0006121	0.250203	0	0.602918
beta_lactam__SHV-123	0.00507614	0.000611448	0.351762	0	0.602277
beta_lactam__OXA-392	0.00609137	0.000610083	0.183205	0	0.600932
quinolone__QnrB20	0.00304569	0.000608797	0.433629	0	0.599665
beta_lactam__AXC-3	0.00812183	0.00060732	0.313814	0	0.598211
beta_lactam__Bla2	0.0172589	0.000606775	0.0560513	0	0.597673
beta_lactam__LUT-1	0.013198	0.000606732	0.191242	0	0.597631
beta_lactam__PDC-7	0.0111675	0.00060527	0.120236	0	0.596191
beta_lactam__TEM-114	0.00609137	0.000604485	0.192959	0	0.595418
beta_lactam__GMB-1	0.00812183	0.000604224	0.166576	0	0.59516
beta_lactam__DHA-5	0.00304569	0.000600513	0.466955	0	0.591506
beta_lactam__OCH-7	0.00609137	0.000599032	0.202869	0	0.590046
multidrug__qacB	0.0111675	0.000597827	0.243219	0	0.58886
beta_lactam__AXC-4	0.0071066	0.000590631	0.184887	0	0.581771
beta_lactam__ADC-22	0.00913706	0.000588855	0.172531	0	0.580022
beta_lactam__ADC-77	0.00507614	0.000586102	0.345063	0	0.57731
beta_lactam__ECM-1	0.0071066	0.000580523	0.143956	0	0.571815
beta_lactam__PLA-6	0.00406091	0.000578936	0.374801	0	0.570252
beta_lactam__ACT-28	0.0101523	0.000578123	0.256494	0	0.569452
beta_lactam__RAHN-2	0.00507614	0.000577998	0.211162	0	0.569328
polymyxin__mcr-1.2	0.00406091	0.000576781	0.280395	0	0.568129
beta_lactam__SGM-7	0.013198	0.000574693	0.0753474	0	0.566073
beta_lactam__PDC-86	0.00101523	0.00057136	0.56279	0	0.56279
beta_lactam__OXA-405	0.00203046	0.000570584	0.478984	0	0.562025
beta_lactam__OXA-28	0.00609137	0.00057014	0.23499	0	0.561588
beta_lactam__ORN-5	0.0101523	0.00056756	0.387668	0	0.559047
beta_lactam__IMP-33	0.00507614	0.000566962	0.25808	0	0.558458
chloramphenicol__catV	0.00507614	0.000565951	0.352751	0	0.557461
beta_lactam__ADC-44	0.00812183	0.000563394	0.272992	0	0.554943
beta_lactam__LEN-41	0.00913706	0.000563306	0.176799	0	0.554857
beta_lactam__MIR-14	0.0142132	0.000563082	0.142172	0	0.554636
aminoglycoside__AAC(6')-Is	0.00507614	0.000562782	0.19024	0	0.554341
beta_lactam__CTX-M-19	0.00304569	0.000560338	0.228347	0	0.551933
beta_lactam__GIM-1	0.00609137	0.000558246	0.381254	0	0.549873
beta_lactam__RSA-1	0.00406091	0.000556336	0.196367	0	0.547991
quinolone__QnrS11	0.00507614	0.0005523	0.231947	0	0.544016
beta_lactam__OXA-459	0.00812183	0.000550755	0.173576	0	0.542493
tetracycline__tet(57)	0.00406091	0.000542924	0.213581	0	0.53478
macrolide-lincosamide-streptogramin__mef(E)	0.00507614	0.000536928	0.169083	0	0.528874
beta_lactam__AXC-5	0.00304569	0.000531068	0.249323	0	0.523102
beta_lactam__OXA-333	0.00101523	0.000529813	0.521866	0	0.521866
beta_lactam__ACT-4	0.00812183	0.000529149	0.213258	0	0.521212
aminoglycoside__ANT(4')-IIa	0.00304569	0.000527698	0.439478	0	0.519782
quinolone__QnrB1	0.00203046	0.000524663	0.318414	0	0.516793
beta_lactam__OCH-6	0.00507614	0.000524206	0.1877	0	0.516343
beta_lactam__Chryseobacterium meningosepticum BlaB	0.00203046	0.000506949	0.403575	0	0.499345
beta_lactam__IMP-16	0.00507614	0.000502807	0.279992	0	0.495265
macrolide-lincosamide-streptogramin__erm(R)	0.00812183	0.000501532	0.162753	0	0.494009
beta_lactam__SHV-23	0.0071066	0.000500374	0.259999	0	0.492868
beta_lactam__IMP-21	0.00609137	0.00049813	0.232074	0	0.490658
beta_lactam__RSA-2	0.0101523	0.000495216	0.170138	0	0.487788
beta_lactam__PFM-1	0.0071066	0.000491456	0.247604	0	0.484085
aminoglycoside__APH(3')-Va	0.00507614	0.00048908	0.160222	0	0.481744
beta_lactam__IND-4	0.00406091	0.000488244	0.319273	0	0.48092
beta_lactam__ACT-13	0.00913706	0.000483338	0.213258	0	0.476088
macrolide-lincosamide-streptogramin__VgbC	0.00913706	0.000481998	0.160711	0	0.474768
beta_lactam__SHV-37	0.00406091	0.000480936	0.342293	0	0.473722
beta_lactam__OXA-145	0.00101523	0.000478938	0.471754	0	0.471754
aminoglycoside__AAC(6')-Ix	0.00203046	0.000478564	0.308051	0	0.471385
beta_lactam__OKP-B-13	0.00406091	0.000477492	0.182984	0	0.47033
beta_lactam__CTX-M-1	0.00406091	0.0004769	0.245689	0	0.469746
beta_lactam__OCH-1	0.0071066	0.000475658	0.257667	0	0.468523
beta_lactam__OCH-5	0.0142132	0.000474706	0.120485	0	0.467586
beta_lactam__OXA-724	0.0071066	0.000473261	0.156487	0	0.466162
beta_lactam__GES-15	0.00304569	0.000470691	0.302116	0	0.46363
beta_lactam__CIA-1	0.00406091	0.000470282	0.214066	0	0.463228
beta_lactam__OXA-900	0.00101523	0.000470069	0.463018	0	0.463018
beta_lactam__DES-1	0.00507614	0.000469836	0.156063	0	0.462789
beta_lactam__CTX-M-144	0.00304569	0.000469403	0.380579	0	0.462362
macrolide-lincosamide-streptogramin__salB	0.00609137	0.000466851	0.204711	0	0.459848
beta_lactam__VIM-28	0.00203046	0.000465133	0.430759	0	0.458156
beta_lactam__PAC-1	0.00304569	0.000459539	0.336901	0	0.452646
beta_lactam__KPC-15	0.00304569	0.000459528	0.364151	0	0.452635
defensin__Clostridium perfringens mprF	0.0071066	0.000459119	0.172838	0	0.452232
beta_lactam__SHV-121	0.00609137	0.000451601	0.157257	0	0.444827
polymyxin__mcr-4.3	0.00609137	0.000449688	0.231081	0	0.442943
beta_lactam__ACT-31	0.00203046	0.000448026	0.426516	0	0.441305
beta_lactam__HERA-8	0.00812183	0.00044801	0.205119	0	0.44129
beta_lactam__OXA-455	0.0071066	0.0004476	0.0867882	0	0.440886
vancomycin__vanP	0.0071066	0.000445576	0.12722	0	0.438892
aminoglycoside__AAC(6')-Iv	0.00101523	0.00044505	0.438375	0	0.438375
beta_lactam__CTX-M-52	0.00406091	0.000443007	0.224737	0	0.436362
beta_lactam__Yrc-1	0.00812183	0.00044234	0.177561	0	0.435705
aminoglycoside__rmtF	0.00101523	0.000438739	0.432158	0	0.432158
aminoglycoside__cpaA	0.00913706	0.000438622	0.0911858	0	0.432042
beta_lactam__MIR-9	0.00507614	0.000434071	0.175624	0	0.42756
beta_lactam__CblA-1	0.00507614	0.00043351	0.189784	0	0.427008
beta_lactam__OXA-48	0.00203046	0.000433184	0.235877	0	0.426686
beta_lactam__ACT-15	0.00406091	0.000432687	0.273899	0	0.426197
beta_lactam__OXA-574	0.0071066	0.000432368	0.197477	0	0.425883
aminoglycoside__AAC(6')-I30	0.00101523	0.000432097	0.425616	0	0.425616
beta_lactam__CTX-M-10	0.00406091	0.000426374	0.182745	0	0.419978
beta_lactam__GOB-7	0.00304569	0.000423126	0.204554	0	0.41678
beta_lactam__ACT-16	0.00609137	0.000419798	0.121737	0	0.413501
beta_lactam__SHV-4	0.00507614	0.000419726	0.199427	0	0.41343
beta_lactam__ADC-42	0.00304569	0.000417453	0.19399	0	0.411191
beta_lactam__OXA-17	0.00203046	0.000416982	0.23499	0	0.410727
beta_lactam__OXA-54	0.00507614	0.000416449	0.168752	0	0.410202
beta_lactam__TEM-83	0.00304569	0.000415706	0.202561	0	0.409471
beta_lactam__TEM-116	0.00812183	0.000408391	0.118471	0	0.402265
beta_lactam__ADC-19	0.00913706	0.000408348	0.172531	0	0.402222
beta_lactam__OXA-407	0.00203046	0.000405662	0.228129	0	0.399577
beta_lactam__IMP-24	0.00913706	0.000404328	0.103795	0	0.398263
beta_lactam__OXA-320	0.00304569	0.000403993	0.163686	0	0.397933
beta_lactam__OXA-235	0.00203046	0.000402993	0.226476	0	0.396948
beta_lactam__ARL-4	0.00203046	0.000399354	0.31418	0	0.393364
polymyxin__mcr-1.3	0.00304569	0.000395187	0.208767	0	0.389259
beta_lactam__CTX-M-22	0.00406091	0.000390977	0.156107	0	0.385113
beta_lactam__TEM-171	0.00507614	0.000388251	0.119127	0	0.382427
beta_lactam__OXA-358	0.00304569	0.000387163	0.185218	0	0.381356
beta_lactam__OXA-243	0.00406091	0.00038716	0.183097	0	0.381353
beta_lactam__TRU-1	0.00406091	0.000380008	0.192905	0	0.374308
macrolide-lincosamide-streptogramin__erm(Z)	0.00812183	0.000378059	0.101767	0	0.372388
beta_lactam__TEM-177	0.00203046	0.000376651	0.218557	0	0.371001
macrolide-lincosamide-streptogramin__erm(48)	0.00101523	0.000373166	0.367568	0	0.367568
beta_lactam__CTX-M-151	0.0071066	0.000371107	0.154129	0	0.36554
beta_lactam__ADC-13	0.00609137	0.000368804	0.174707	0	0.363272
aminoglycoside__AAC(6')-Iy	0.00304569	0.000368418	0.155088	0	0.362891
beta_lactam__PDC-10	0.013198	0.000364101	0.109403	0	0.358639
beta_lactam__BUT-1	0.00913706	0.000362823	0.113397	0	0.35738
beta_lactam__GOB-33	0.00507614	0.000361882	0.191158	0	0.356454
beta_lactam__RUB-1	0.00304569	0.000360078	0.175018	0	0.354677
macrolide-lincosamide-streptogramin__mph(J)	0.00812183	0.000355824	0.129599	0	0.350487
trimethoprim__dfrA25	0.00304569	0.000353313	0.156789	0	0.348013
beta_lactam__TEM-123	0.00304569	0.000351983	0.165089	0	0.346703
polymyxin__mcr-2.2	0.00609137	0.000350232	0.0811477	0	0.344979
beta_lactam__VIM-39	0.00101523	0.000349855	0.344607	0	0.344607
beta_lactam__OXA-280	0.00101523	0.000347395	0.342184	0	0.342184
beta_lactam__FOX-4	0.0071066	0.000346922	0.126815	0	0.341718
beta_lactam__IMP-5	0.00406091	0.000346861	0.190978	0	0.341658
beta_lactam__OXA-397	0.00304569	0.000346391	0.170228	0	0.341195
aminoglycoside__AAC(6')-Ir	0.00203046	0.000342938	0.274243	0	0.337794
trimethoprim__dfrA13	0.00507614	0.000342719	0.146846	0	0.337578
beta_lactam__SHV-42	0.00406091	0.000340476	0.160118	0	0.335369
macrolide-lincosamide-streptogramin__oleI	0.00609137	0.000339955	0.220867	0	0.334856
quinolone__QnrB2	0.00203046	0.000337003	0.222728	0	0.331948
multidrug__mtrC	0.00406091	0.000336899	0.192777	0	0.331846
beta_lactam__NDM-12	0.00203046	0.000336775	0.250985	0	0.331723
beta_lactam__CTX-M-21	0.00507614	0.000335723	0.0819479	0	0.330687
vancomycin__vanUG	0.00203046	0.000334432	0.175087	0	0.329415
macrolide-lincosamide-streptogramin__vgaALC	0.00913706	0.000330931	0.163328	0	0.325967
beta_lactam__DHA-2	0.00203046	0.000327821	0.266831	0	0.322903
beta_lactam__OKP-A-16	0.00406091	0.000327603	0.184159	0	0.322689
beta_lactam__SHV-9	0.00609137	0.000327551	0.153169	0	0.322638
beta_lactam__MOX-5	0.00304569	0.000326273	0.229711	0	0.321379
beta_lactam__PDC-93	0.00406091	0.000325792	0.146807	0	0.320905
beta_lactam__EAM-1	0.00406091	0.000325011	0.188225	0	0.320136
beta_lactam__OXA-298	0.00203046	0.000323339	0.272916	0	0.318489
trimethoprim__dfrA29	0.00101523	0.000318353	0.313577	0	0.313577
beta_lactam__OKP-A-12	0.00101523	0.000317228	0.31247	0	0.31247
fusidic_acid__fusD	0.00101523	0.000316718	0.311968	0	0.311968
fusidic_acid__FusF	0.00101523	0.000315238	0.31051	0	0.31051
beta_lactam__TEM-149	0.00304569	0.000314729	0.197917	0	0.310008
beta_lactam__MOX-6	0.00507614	0.000314184	0.142001	0	0.309471
beta_lactam__BES-1	0.00406091	0.000313583	0.122209	0	0.30888
beta_lactam__GOB-3	0.00609137	0.000311171	0.0945466	0	0.306504
beta_lactam__OXA-232	0.00406091	0.000310399	0.0900632	0	0.305743
trimethoprim__dfrA15b	0.00203046	0.000306746	0.151891	0	0.302145
beta_lactam__OXA-270	0.00609137	0.000306435	0.10132	0	0.301839
beta_lactam__MIR-17	0.00507614	0.000304523	0.168955	0	0.299955
macrolide-lincosamide-streptogramin__erm(K)	0.0071066	0.00030382	0.0898273	0	0.299262
beta_lactam__HERA-4	0.00304569	0.000303582	0.17436	0	0.299028
macrolide-lincosamide-streptogramin__erm(49)	0.00304569	0.000303109	0.139811	0	0.298562
beta_lactam__LEN-42	0.00609137	0.000301139	0.0996978	0	0.296622
trimethoprim__dfrE	0.00304569	0.000300295	0.136157	0	0.29579
beta_lactam__TEM-153	0.00203046	0.000299268	0.218557	0	0.294779
defensin__Listeria monocytogenes mprF	0.00304569	0.000298929	0.190901	0	0.294445
beta_lactam__OXA-664	0.00406091	0.000295608	0.187678	0	0.291174
beta_lactam__OXA-356	0.00101523	0.000295199	0.290771	0	0.290771
macrolide-lincosamide-streptogramin__ereA2	0.013198	0.00029491	0.0584115	0	0.290486
vancomycin__vanYB	0.00507614	0.000290167	0.126411	0	0.285814
antibacterial_fatty_acid__farB	0.0101523	0.000288891	0.0926016	0	0.284557
beta_lactam__SHV-70	0.00406091	0.000282408	0.164912	0	0.278172
quinolone__QnrB17	0.00304569	0.000277134	0.109859	0	0.272977
beta_lactam__SHV-25	0.00507614	0.000275987	0.0800589	0	0.271847
beta_lactam__MIR-5	0.00406091	0.000273902	0.122693	0	0.269793
macrolide-lincosamide-streptogramin__vgb(A)	0.0111675	0.000272807	0.0484461	0	0.268715
polymyxin__mcr-1.1	0.00304569	0.00027225	0.18693	0	0.268167
beta_lactam__GOB-4	0.00406091	0.000272109	0.183375	0	0.268028
beta_lactam__CMY-26	0.00304569	0.00027141	0.133934	0	0.267338
aminoglycoside__APH(2'')-Ig	0.00203046	0.000268209	0.180471	0	0.264186
beta_lactam__cphA5	0.00203046	0.000265324	0.246092	0	0.261344
beta_lactam__IMP-15	0.00304569	0.000264282	0.0970193	0	0.260318
quinolone__QnrB33	0.00203046	0.00026409	0.236283	0	0.260129
beta_lactam__OXA-258	0.00507614	0.000263886	0.082072	0	0.259927
beta_lactam__OXA-14	0.00203046	0.000263441	0.169839	0	0.259489
beta_lactam__OXA-299	0.00101523	0.000262038	0.258107	0	0.258107
beta_lactam__LEN-3	0.0071066	0.000261708	0.0903807	0	0.257783
beta_lactam__CMY-2	0.00203046	0.000259414	0.146524	0	0.255523
polymyxin__mcr-3.3	0.00609137	0.000259368	0.190208	0	0.255477
macrolide-lincosamide-streptogramin__RlmA(II)	0.00304569	0.000258407	0.108407	0	0.254531
multidrug__cdeA	0.0121827	0.000258374	0.0542111	0	0.254499
aminoglycoside__APH(3')-Vb	0.00304569	0.000258212	0.171782	0	0.254339
beta_lactam__IMP-11	0.0071066	0.000257891	0.0644526	0	0.254023
beta_lactam__PDC-2	0.00304569	0.000256383	0.191423	0	0.252538
beta_lactam__CTX-M-38	0.00304569	0.000254161	0.157367	0	0.250348
beta_lactam__TEM-194	0.00304569	0.000254134	0.0989583	0	0.250322
beta_lactam__HERA-5	0.00101523	0.000250291	0.246537	0	0.246537
trimethoprim__dfrA9	0.00203046	0.000250198	0.129361	0	0.246445
beta_lactam__FONA-6	0.00101523	0.000249443	0.245701	0	0.245701
beta_lactam__DHA-16	0.00304569	0.000248954	0.116841	0	0.245219
beta_lactam__NDM-16	0.00203046	0.000248872	0.161478	0	0.245139
chloramphenicol__Enterococcus faecalis chloramphenicol acetyltransferase	0.00304569	0.000248612	0.115592	0	0.244883
beta_lactam__PDC-3	0.00304569	0.000248571	0.202972	0	0.244843
beta_lactam__ADC-18	0.00406091	0.000248352	0.19399	0	0.244627
beta_lactam__CTX-M-42	0.00203046	0.000247795	0.16213	0	0.244078
beta_lactam__IMP-22	0.00507614	0.00024773	0.159178	0	0.244014
beta_lactam__ADC-6	0.00304569	0.000247134	0.174707	0	0.243427
multidrug__smeA	0.0162437	0.000244577	0.0658148	0	0.240908
beta_lactam__VIM-3	0.00101523	0.000243327	0.239677	0	0.239677
beta_lactam__CTX-M-4	0.00203046	0.000241883	0.200282	0	0.238255
beta_lactam__CRP-1	0.00406091	0.000241666	0.112452	0	0.238041
beta_lactam__TEM-59	0.00203046	0.000239786	0.209142	0	0.236189
beta_lactam__OXA-252	0.00101523	0.000239469	0.235877	0	0.235877
beta_lactam__ARL-2	0.00101523	0.000239223	0.235635	0	0.235635
beta_lactam__ACT-20	0.00406091	0.000239106	0.142172	0	0.235519
macrolide-lincosamide-streptogramin__lsa(C)	0.00507614	0.000238749	0.0863876	0	0.235168
beta_lactam__TEM-147	0.00304569	0.000238167	0.16633	0	0.234595
beta_lactam__IMP-49	0.00101523	0.000234651	0.231131	0	0.231131
beta_lactam__TEM-133	0.00203046	0.000234634	0.154893	0	0.231115
beta_lactam__OXA-19	0.00812183	0.00023402	0.0839465	0	0.230509
beta_lactam__IND-7	0.00507614	0.000233295	0.0739981	0	0.229796
beta_lactam__HERA-6	0.00304569	0.000233036	0.0847799	0	0.22954
quinolone__QnrB45	0.00203046	0.000233	0.118141	0	0.229505
beta_lactam__GOB-1	0.00406091	0.000232128	0.0983227	0	0.228646
aminoglycoside__APH(3')-VIIIa	0.00304569	0.000230005	0.163365	0	0.226555
beta_lactam__TEM-159	0.00406091	0.00022999	0.0833282	0	0.22654
beta_lactam__OXA-117	0.00304569	0.000229615	0.192997	0	0.226171
beta_lactam__TEM-164	0.00406091	0.000229506	0.0892904	0	0.226063
beta_lactam__OXA-183	0.00406091	0.000228121	0.0861518	0	0.2247
vancomycin__vanTE	0.00203046	0.00022667	0.161163	0	0.22327
quinolone__QnrB4	0.00101523	0.00022612	0.222728	0	0.222728
quinolone__QnrB64	0.00101523	0.00022612	0.222728	0	0.222728
polymyxin__mcr-6.1	0.00304569	0.000225919	0.103253	0	0.22253
quinolone__QnrB54	0.00406091	0.000225889	0.111364	0	0.222501
beta_lactam__GES-14	0.00101523	0.000225522	0.222139	0	0.222139
beta_lactam__TEM-157	0.00304569	0.000225258	0.102831	0	0.221879
beta_lactam__OXA-214	0.00203046	0.000224734	0.20035	0	0.221363
beta_lactam__OXA-215	0.00203046	0.000224734	0.20035	0	0.221363
multidrug__qacJ	0.00101523	0.000223824	0.220467	0	0.220467
beta_lactam__ACT-8	0.00609137	0.000223645	0.0635778	0	0.220291
beta_lactam__TEM-107	0.00101523	0.000221886	0.218557	0	0.218557
beta_lactam__KPC-16	0.00203046	0.00022122	0.150774	0	0.217902
beta_lactam__ACT-2	0.00406091	0.000221164	0.0710861	0	0.217846
beta_lactam__AXC-1	0.00406091	0.000219068	0.0799521	0	0.215782
beta_lactam__OXA-535	0.00203046	0.000218888	0.164571	0	0.215604
beta_lactam__OXA-549	0.00101523	0.000218825	0.215543	0	0.215543
beta_lactam__LEN-21	0.00609137	0.000218656	0.0618376	0	0.215376
beta_lactam__SHV-65	0.00203046	0.000213994	0.194999	0	0.210784
beta_lactam__PDC-80	0.00203046	0.000213412	0.177779	0	0.210211
chloramphenicol__catIII	0.00101523	0.000211146	0.207978	0	0.207978
beta_lactam__MIR-11	0.00304569	0.000207979	0.168955	0	0.204859
beta_lactam__TEM-197	0.00304569	0.000204465	0.0940442	0	0.201398
beta_lactam__OXA-265	0.00101523	0.000203401	0.20035	0	0.20035
beta_lactam__VAM-1	0.00203046	0.000202595	0.115909	0	0.199556
chloramphenicol__plasmid-encoded cat (pp-cat)	0.00101523	0.000202114	0.199082	0	0.199082
beta_lactam__VIM-7	0.00406091	0.000201485	0.0890186	0	0.198463
aminoglycoside__kamB	0.00507614	0.000201159	0.0623631	0	0.198142
beta_lactam__GOB-5	0.00507614	0.000200418	0.0717308	0	0.197412
beta_lactam__PEDO-3	0.00406091	0.000199501	0.0622063	0	0.196508
beta_lactam__ADC-12	0.00101523	0.000196945	0.19399	0	0.19399
beta_lactam__OXA-247	0.00101523	0.000196684	0.193734	0	0.193734
tetracycline__tetA(46)	0.00507614	0.000195983	0.0658225	0	0.193043
beta_lactam__DHA-10	0.00203046	0.000195401	0.125762	0	0.19247
beta_lactam__ADC-79	0.00609137	0.000195387	0.0486835	0	0.192457
beta_lactam__ROB-1	0.00203046	0.000194027	0.160696	0	0.191117
beta_lactam__KPC-2	0.00507614	0.000193513	0.089635	0	0.19061
beta_lactam__OXA-450	0.00203046	0.000193194	0.102618	0	0.190296
macrolide-lincosamide-streptogramin__erm(32)	0.00304569	0.000193109	0.0804759	0	0.190213
beta_lactam__Laribacter hongkongensis ampC beta-lactamase	0.00406091	0.000192425	0.0611968	0	0.189539
beta_lactam__TEM-88	0.00304569	0.000192399	0.0892904	0	0.189513
beta_lactam__GOB-14	0.00101523	0.000190914	0.18805	0	0.18805
beta_lactam__TEM-3	0.00304569	0.000189401	0.0833282	0	0.18656
beta_lactam__TMB-2	0.00101523	0.000188275	0.185451	0	0.185451
macrolide-lincosamide-streptogramin__erm(43)	0.00101523	0.000186583	0.183784	0	0.183784
macrolide-lincosamide-streptogramin__erm(30)	0.0071066	0.000185407	0.0806923	0	0.182626
beta_lactam__CRH-3	0.00304569	0.000184337	0.0776678	0	0.181572
beta_lactam__ACT-9	0.00507614	0.000182627	0.0627155	0	0.179888
beta_lactam__CcrA beta-lactamase	0.00101523	0.000182087	0.179356	0	0.179356
beta_lactam__OXA-309	0.00304569	0.000181406	0.0919273	0	0.178685
quinolone__QnrB71	0.00203046	0.000180033	0.118141	0	0.177333
beta_lactam__IMP-1	0.00203046	0.000178332	0.0914135	0	0.175657
polymyxin__mcr-1.12	0.00304569	0.000177956	0.0934649	0	0.175286
beta_lactam__ADC-20	0.00101523	0.000177367	0.174707	0	0.174707
beta_lactam__ADC-75	0.00101523	0.000177367	0.174707	0	0.174707
beta_lactam__OXA-359	0.00101523	0.000177251	0.174593	0	0.174593
beta_lactam__VIM-25	0.00101523	0.000174928	0.172304	0	0.172304
beta_lactam__VIM-4	0.00101523	0.000174928	0.172304	0	0.172304
quinolone__QnrB66	0.00203046	0.000174888	0.106138	0	0.172264
beta_lactam__HERA-2	0.00203046	0.000174579	0.0871802	0	0.17196
beta_lactam__IND-12	0.00101523	0.000173132	0.170535	0	0.170535
beta_lactam__CMY-82	0.00203046	0.000171975	0.139061	0	0.169395
beta_lactam__CTX-M-12	0.00101523	0.000171167	0.1686	0	0.1686
beta_lactam__VIM-14	0.00203046	0.000170665	0.0861518	0	0.168105
aminoglycoside__AAC(6')-Iu	0.00203046	0.000170402	0.140939	0	0.167846
beta_lactam__NDM-9	0.00101523	0.000169871	0.167323	0	0.167323
beta_lactam__TEM-121	0.00101523	0.000169194	0.166656	0	0.166656
trimethoprim__dfrA30	0.00203046	0.00016913	0.121022	0	0.166593
beta_lactam__SHV-112	0.00101523	0.000168362	0.165836	0	0.165836
beta_lactam__OXY-2-8	0.00203046	0.000167702	0.14274	0	0.165187
beta_lactam__TEM-15	0.00203046	0.000167128	0.0883995	0	0.164621
multidrug__mexM	0.00609137	0.000167109	0.0973495	0	0.164602
quinolone__QnrB67	0.00203046	0.000167089	0.101294	0	0.164582
beta_lactam__OKP-B-5	0.00203046	0.000167088	0.0996978	0	0.164582
beta_lactam__SHV-52	0.00203046	0.000166849	0.0996978	0	0.164347
beta_lactam__CTX-M-134	0.00203046	0.000166783	0.0868806	0	0.164282
beta_lactam__VIM-34	0.00203046	0.000166714	0.0861518	0	0.164213
beta_lactam__OXA-182	0.00101523	0.000165427	0.162946	0	0.162946
beta_lactam__PSV-1	0.00101523	0.000164273	0.161808	0	0.161808
edeine__EdeQ	0.00304569	0.000163549	0.0615005	0	0.161096
beta_lactam__PDC-9	0.00609137	0.000162435	0.0567588	0	0.159999
beta_lactam__CSA-2	0.00406091	0.000161502	0.0599673	0	0.15908
beta_lactam__PNGM-1	0.00507614	0.000161183	0.0597941	0	0.158765
beta_lactam__CTX-M-74	0.00203046	0.000160927	0.0810796	0	0.158513
aminoglycoside__AAC(6')-Iaa	0.00101523	0.000160314	0.157909	0	0.157909
beta_lactam__ACT-38	0.00203046	0.000159681	0.142172	0	0.157285
multidrug__Klebsiella pneumoniae KpnH	0.00203046	0.00015965	0.0818017	0	0.157255
beta_lactam__CTX-M-51	0.00203046	0.000159574	0.081065	0	0.157181
beta_lactam__CTX-M-62	0.00203046	0.000157925	0.081065	0	0.155556
beta_lactam__GES-21	0.00203046	0.000157853	0.0814391	0	0.155486
beta_lactam__TEM-94	0.00304569	0.000157823	0.0743054	0	0.155456
chloramphenicol__catA4	0.00304569	0.000157123	0.104095	0	0.154766
beta_lactam__IND-14	0.00406091	0.000155453	0.053475	0	0.153121
beta_lactam__LEN-7	0.00304569	0.000153358	0.0566136	0	0.151058
trimethoprim__dfrA3b	0.00101523	0.000150624	0.148364	0	0.148364
beta_lactam__IND-1	0.00101523	0.00015025	0.147996	0	0.147996
beta_lactam__CMY-6	0.00101523	0.000148756	0.146524	0	0.146524
beta_lactam__OKP-A-4	0.00101523	0.000147416	0.145205	0	0.145205
beta_lactam__OXA-266	0.00101523	0.000147376	0.145165	0	0.145165
beta_lactam__MIR-10	0.00101523	0.000146812	0.144609	0	0.144609
beta_lactam__LEN-15	0.00406091	0.000146715	0.0522418	0	0.144514
beta_lactam__GOB-18	0.00507614	0.000143672	0.0637571	0	0.141517
polymyxin__mcr-4.2	0.00203046	0.00014339	0.11554	0	0.141239
beta_lactam__CMY-63	0.00406091	0.000142559	0.0625509	0	0.140421
beta_lactam__CMY-59	0.00304569	0.000139358	0.0571864	0	0.137268
beta_lactam__SHV-11	0.00304569	0.000139357	0.071948	0	0.137266
beta_lactam__OXA-458	0.00406091	0.000138699	0.0817735	0	0.136619
beta_lactam__IMP-20	0.00203046	0.000137475	0.0835152	0	0.135413
vancomycin__vanN	0.00203046	0.000137228	0.0810677	0	0.135169
aminoglycoside__AAC(6')-Ip	0.00101523	0.000137185	0.135127	0	0.135127
aminoglycoside__AAC(6')-Iid	0.00101523	0.000137146	0.135089	0	0.135089
macrolide-lincosamide-streptogramin__LpeA	0.00812183	0.000136847	0.0455067	0	0.134794
beta_lactam__TEM-91	0.00203046	0.00013656	0.0766368	0	0.134511
polymyxin__mcr-3.1	0.00507614	0.000133513	0.0446916	0	0.131511
beta_lactam__CFE-1	0.00304569	0.000133374	0.0826769	0	0.131374
beta_lactam__PDC-1	0.00304569	0.00013307	0.0601178	0	0.131074
polymyxin__mcr-1.13	0.00304569	0.000132871	0.0467324	0	0.130878
beta_lactam__MIR-2	0.00406091	0.000132664	0.035548	0	0.130674
beta_lactam__LEN-40	0.00203046	0.00013256	0.0781804	0	0.130572
beta_lactam__MUS-2	0.00101523	0.000132068	0.130087	0	0.130087
beta_lactam__ACC-3	0.00304569	0.000131198	0.0810899	0	0.12923
beta_lactam__DHA-18	0.00203046	0.000130333	0.0667078	0	0.128378
beta_lactam__OXA-163	0.00101523	0.000128768	0.126836	0	0.126836
beta_lactam__CMY-73	0.00101523	0.000127007	0.125102	0	0.125102
beta_lactam__KPC-9	0.00203046	0.000126658	0.082112	0	0.124758
beta_lactam__CMY-83	0.00101523	0.000125717	0.123832	0	0.123832
beta_lactam__AQU-2	0.00406091	0.000123031	0.0597724	0	0.121185
beta_lactam__VIM-26	0.00203046	0.000122876	0.0861518	0	0.121033
beta_lactam__IMP-28	0.00203046	0.000121229	0.0641906	0	0.119411
polymyxin__mcr-3.9	0.00406091	0.000121029	0.0851486	0	0.119214
beta_lactam__SHV-147	0.00101523	0.000119981	0.118181	0	0.118181
beta_lactam__IMP-12	0.00101523	0.000118818	0.117036	0	0.117036
quinolone__QnrB8	0.00101523	0.000116638	0.114889	0	0.114889
beta_lactam__imiS	0.00304569	0.000116233	0.0459175	0	0.114489
beta_lactam__ORN-1	0.00203046	0.000115514	0.0818965	0	0.113781
beta_lactam__CMY-70	0.00304569	0.00011539	0.0572165	0	0.113659
beta_lactam__IND-8	0.00101523	0.000115047	0.113321	0	0.113321
vancomycin__vanTC	0.00304569	0.000114558	0.059316	0	0.11284
beta_lactam__IMP-2	0.00304569	0.000114127	0.0468144	0	0.112415
quinolone__QnrB57	0.00101523	0.000113572	0.111868	0	0.111868
quinolone__QnrB13	0.00101523	0.00011306	0.111364	0	0.111364
quinolone__QnrB72	0.00101523	0.00011306	0.111364	0	0.111364
beta_lactam__SHV-137	0.00203046	0.000113037	0.071948	0	0.111342
beta_lactam__LRG-1	0.00203046	0.000112147	0.0854082	0	0.110465
beta_lactam__IMP-48	0.00406091	0.000110952	0.0470513	0	0.109287
beta_lactam__SHV-6	0.00203046	0.000110685	0.0916611	0	0.109025
beta_lactam__IMI-1	0.00101523	0.000109931	0.108282	0	0.108282
beta_lactam__ACT-25	0.00304569	0.000109635	0.0543341	0	0.10799
beta_lactam__TEM-109	0.00203046	0.000108989	0.0578746	0	0.107354
quinolone__QnrB42	0.00101523	0.000107754	0.106138	0	0.106138
beta_lactam__CTX-M-115	0.00304569	0.000106648	0.063538	0	0.105049
beta_lactam__TEM-102	0.00406091	0.000106241	0.0356954	0	0.104647
quinolone__QnrB26	0.00101523	0.00010597	0.10438	0	0.10438
beta_lactam__ADC-3	0.00304569	0.000105829	0.0608544	0	0.104241
beta_lactam__OXA-9	0.00203046	0.000105291	0.0739401	0	0.103711
beta_lactam__OXA-16	0.00203046	0.000103921	0.0878935	0	0.102362
beta_lactam__VIM-20	0.00203046	0.000103508	0.0798922	0	0.101956
quinolone__QnrVC5	0.00101523	0.000103151	0.101604	0	0.101604
beta_lactam__EBR-2	0.00101523	0.000102957	0.101412	0	0.101412
beta_lactam__CTX-M-141	0.00304569	0.000102257	0.0671085	0	0.100724
beta_lactam__TEM-16	0.00203046	0.000100461	0.0774465	0	0.0989544
beta_lactam__ADC-23	0.00304569	0.000100002	0.0622242	0	0.0985021
beta_lactam__IND-9	0.00304569	9.98775e-05	0.0551133	0	0.0983794
beta_lactam__MOX-1	0.00406091	9.93085e-05	0.0301475	0	0.0978188
beta_lactam__GOB-8	0.00101523	9.93006e-05	0.0978111	0	0.0978111
beta_lactam__CTX-M-114	0.00101523	9.87391e-05	0.097258	0	0.097258
beta_lactam__IMP-10	0.00101523	9.84968e-05	0.0970193	0	0.0970193
aminoglycoside__AAC(6')-Iaj	0.00101523	9.84062e-05	0.0969301	0	0.0969301
beta_lactam__CMY-64	0.00203046	9.80551e-05	0.0663576	0	0.0965843
beta_lactam__SHV-105	0.00101523	9.74276e-05	0.0959662	0	0.0959662
beta_lactam__CTX-M-2	0.00203046	9.70574e-05	0.0735513	0	0.0956015
vancomycin__vanL	0.00203046	9.68487e-05	0.0585036	0	0.0953959
beta_lactam__MIR-3	0.00203046	9.63755e-05	0.0663188	0	0.0949299
macrolide-lincosamide-streptogramin__salC	0.00203046	9.57079e-05	0.0527053	0	0.0942723
polymyxin__mcr-3.8	0.00406091	9.56615e-05	0.0441331	0	0.0942265
beta_lactam__OXA-257	0.00101523	9.29973e-05	0.0916024	0	0.0916024
beta_lactam__OXA-568	0.00101523	9.29973e-05	0.0916024	0	0.0916024
beta_lactam__SHV-14	0.00101523	9.1409e-05	0.0900379	0	0.0900379
beta_lactam__LEN-43	0.00304569	9.13337e-05	0.0461708	0	0.0899637
beta_lactam__PFM-3	0.00304569	9.10862e-05	0.0514587	0	0.0897199
polymyxin__mcr-3.7	0.00304569	8.99746e-05	0.0440515	0	0.088625
beta_lactam__CMY-48	0.00203046	8.98175e-05	0.0581357	0	0.0884702
beta_lactam__ADC-58	0.00101523	8.93562e-05	0.0880159	0	0.0880159
beta_lactam__ADC-76	0.00101523	8.93562e-05	0.0880159	0	0.0880159
beta_lactam__FRI-2	0.00101523	8.90126e-05	0.0876774	0	0.0876774
beta_lactam__mreA	0.00304569	8.83668e-05	0.0365169	0	0.0870413
beta_lactam__CTX-M-54	0.00101523	8.82036e-05	0.0868806	0	0.0868806
beta_lactam__IMP-26	0.00101523	8.77031e-05	0.0863876	0	0.0863876
beta_lactam__ACT-24	0.00203046	8.76463e-05	0.0710861	0	0.0863316
beta_lactam__TEM-8	0.00101523	8.72748e-05	0.0859657	0	0.0859657
aminoglycoside__AAC(6')-Iaf	0.00203046	8.72021e-05	0.0638714	0	0.0858941
beta_lactam__OXA-31	0.00101523	8.67723e-05	0.0854707	0	0.0854707
beta_lactam__OXA-240	0.00101523	8.62128e-05	0.0849196	0	0.0849196
beta_lactam__OXA-484	0.00101523	8.61516e-05	0.0848593	0	0.0848593
beta_lactam__IMP-52	0.00101523	8.49207e-05	0.0836468	0	0.0836468
beta_lactam__TEM-146	0.00101523	8.4721e-05	0.0834502	0	0.0834502
beta_lactam__TEM-211	0.00101523	8.45972e-05	0.0833282	0	0.0833282
beta_lactam__TEM-55	0.00101523	8.45972e-05	0.0833282	0	0.0833282
beta_lactam__TEM-67	0.00101523	8.45972e-05	0.0833282	0	0.0833282
beta_lactam__OXA-368	0.00101523	8.45376e-05	0.0832696	0	0.0832696
beta_lactam__STA-1	0.00101523	8.43061e-05	0.0830415	0	0.0830415
aminoglycoside__rmtA	0.00101523	8.39859e-05	0.0827261	0	0.0827261
quinolone__QnrB22	0.00101523	8.39561e-05	0.0826968	0	0.0826968
beta_lactam__CTX-M-23	0.00304569	8.393e-05	0.0387169	0	0.0826711
beta_lactam__CTX-M-7	0.00101523	8.32653e-05	0.0820163	0	0.0820163
beta_lactam__CTX-M-9	0.00101523	8.31436e-05	0.0818965	0	0.0818965
beta_lactam__ORN-2	0.00101523	8.31436e-05	0.0818965	0	0.0818965
beta_lactam__CTX-M-68	0.00101523	8.30409e-05	0.0817953	0	0.0817953
beta_lactam__OKP-A-5	0.00101523	8.29684e-05	0.0817239	0	0.0817239
beta_lactam__TEM-52	0.00101523	8.29684e-05	0.0817239	0	0.0817239
beta_lactam__SHV-167	0.00101523	8.2431e-05	0.0811945	0	0.0811945
beta_lactam__VIM-18	0.00101523	8.23472e-05	0.081112	0	0.081112
beta_lactam__CARB-18	0.00101523	8.21397e-05	0.0809076	0	0.0809076
beta_lactam__NDM-13	0.00101523	8.19683e-05	0.0807388	0	0.0807388
beta_lactam__OXA-286	0.00203046	8.19258e-05	0.0408616	0	0.0806969
beta_lactam__CTX-M-11	0.00101523	8.1771e-05	0.0805444	0	0.0805444
beta_lactam__LEN-9	0.00101523	8.12781e-05	0.0800589	0	0.0800589
beta_lactam__SHV-48	0.00101523	8.12781e-05	0.0800589	0	0.0800589
beta_lactam__VIM-23	0.00101523	8.11089e-05	0.0798922	0	0.0798922
beta_lactam__CKO-1	0.00101523	8.09039e-05	0.0796904	0	0.0796904
beta_lactam__cphA3	0.00304569	8.08281e-05	0.0325829	0	0.0796157
beta_lactam__OXA-301	0.00203046	8.06431e-05	0.0512719	0	0.0794334
beta_lactam__TEM-169	0.00101523	8.0184e-05	0.0789812	0	0.0789812
beta_lactam__CMY-57	0.00203046	8.0053e-05	0.0544994	0	0.0788522
beta_lactam__TEM-199	0.00101523	7.94594e-05	0.0782675	0	0.0782675
beta_lactam__LEN-37	0.00101523	7.93709e-05	0.0781804	0	0.0781804
aminoglycoside__APH(3')-IVa	0.00101523	7.91172e-05	0.0779304	0	0.0779304
beta_lactam__CTX-M-32	0.00101523	7.88062e-05	0.0776241	0	0.0776241
beta_lactam__TEM-125	0.00101523	7.86259e-05	0.0774465	0	0.0774465
beta_lactam__CMY-93	0.00203046	7.84471e-05	0.0619158	0	0.0772703
beta_lactam__OXA-224	0.00101523	7.81702e-05	0.0769976	0	0.0769976
beta_lactam__OXA-42	0.00203046	7.75388e-05	0.0418834	0	0.0763757
beta_lactam__TEM-106	0.00101523	7.73827e-05	0.0762219	0	0.0762219
beta_lactam__CTX-M-126	0.00101523	7.72749e-05	0.0761158	0	0.0761158
beta_lactam__CTX-M-82	0.00101523	7.72749e-05	0.0761158	0	0.0761158
beta_lactam__CTX-M-87	0.00101523	7.72749e-05	0.0761158	0	0.0761158
beta_lactam__SHV-134	0.00304569	7.67041e-05	0.0324421	0	0.0755536
beta_lactam__VEB-1b	0.00101523	7.66977e-05	0.0755472	0	0.0755472
beta_lactam__OXY-3-1	0.00101523	7.64024e-05	0.0752563	0	0.0752563
beta_lactam__IMP-42	0.00101523	7.63053e-05	0.0751608	0	0.0751608
beta_lactam__CTX-M-101	0.00101523	7.60531e-05	0.0749123	0	0.0749123
beta_lactam__CTX-M-111	0.00101523	7.60531e-05	0.0749123	0	0.0749123
beta_lactam__CTX-M-16	0.00101523	7.56253e-05	0.0744909	0	0.0744909
beta_lactam__OXY-2-9	0.00101523	7.51882e-05	0.0740603	0	0.0740603
multidrug__qacA	0.00203046	7.51811e-05	0.0519585	0	0.0740534
beta_lactam__GES-3	0.00101523	7.51741e-05	0.0740465	0	0.0740465
beta_lactam__GES-7	0.00101523	7.51741e-05	0.0740465	0	0.0740465
beta_lactam__VHW-1	0.00101523	7.49289e-05	0.073805	0	0.073805
beta_lactam__BEL-3	0.00101523	7.3818e-05	0.0727107	0	0.0727107
beta_lactam__TEM-143	0.00203046	7.36669e-05	0.0494791	0	0.0725619
beta_lactam__LEN-39	0.00406091	7.35905e-05	0.0220243	0	0.0724866
beta_lactam__OKP-B-6	0.00101523	7.34844e-05	0.0723821	0	0.0723821
beta_lactam__ADC-21	0.00203046	7.28028e-05	0.0540504	0	0.0717108
beta_lactam__GOB-10	0.00101523	7.25499e-05	0.0714616	0	0.0714616
beta_lactam__TEM-60	0.00101523	7.2478e-05	0.0713908	0	0.0713908
beta_lactam__ACT-5	0.00101523	7.21686e-05	0.0710861	0	0.0710861
beta_lactam__CTX-M-26	0.00203046	7.20073e-05	0.0517624	0	0.0709272
beta_lactam__ADC-30	0.00304569	7.17972e-05	0.0316229	0	0.0707202
beta_lactam__CTX-M-100	0.00101523	7.17886e-05	0.0707118	0	0.0707118
beta_lactam__RAHN-1	0.00101523	7.14592e-05	0.0703873	0	0.0703873
beta_lactam__BIC-1	0.00101523	7.10561e-05	0.0699902	0	0.0699902
beta_lactam__IMP-43	0.00203046	7.02232e-05	0.0377173	0	0.0691699
beta_lactam__SHV-135	0.00203046	6.96309e-05	0.0448378	0	0.0685864
beta_lactam__OKP-A-6	0.00203046	6.72697e-05	0.0463962	0	0.0662607
beta_lactam__SHV-168	0.00203046	6.70166e-05	0.0494791	0	0.0660114
vancomycin__vanE	0.00203046	6.65826e-05	0.0394975	0	0.0655838
beta_lactam__mecC	0.00101523	6.65607e-05	0.0655623	0	0.0655623
polymyxin__mcr-3.12	0.00203046	6.53237e-05	0.0403336	0	0.0643439
beta_lactam__ADC-16	0.00203046	6.41597e-05	0.0331285	0	0.0631973
beta_lactam__OXA-154	0.00203046	6.34543e-05	0.0435319	0	0.0625025
beta_lactam__SME-2	0.00203046	6.31582e-05	0.0396595	0	0.0622108
beta_lactam__CMY-100	0.00101523	6.28587e-05	0.0619158	0	0.0619158
beta_lactam__OXA-55	0.00101523	6.26531e-05	0.0617133	0	0.0617133
beta_lactam__TEM-57	0.00203046	6.26402e-05	0.0311803	0	0.0617006
beta_lactam__OKP-A-7	0.00101523	6.22905e-05	0.0613561	0	0.0613561
beta_lactam__CMY-42	0.00101523	6.13739e-05	0.0604533	0	0.0604533
aminoglycoside__aacA43	0.00304569	6.11625e-05	0.0210073	0	0.0602451
quinolone__QnrB11	0.00203046	6.06838e-05	0.0360384	0	0.0597735
beta_lactam__ACT-7	0.00101523	6.05234e-05	0.0596156	0	0.0596156
beta_lactam__CMY-27	0.00101523	6.0349e-05	0.0594437	0	0.0594437
beta_lactam__PDC-87	0.00101523	5.95307e-05	0.0586378	0	0.0586378
beta_lactam__CMY-99	0.00101523	5.9021e-05	0.0581357	0	0.0581357
beta_lactam__CMY-29	0.00101523	5.80438e-05	0.0571731	0	0.0571731
beta_lactam__OXA-305	0.00203046	5.67985e-05	0.0419476	0	0.0559465
beta_lactam__CMA-2	0.00203046	5.65455e-05	0.0404047	0	0.0556973
beta_lactam__TEM-48	0.00101523	5.61184e-05	0.0552767	0	0.0552767
beta_lactam__ACC-2	0.00101523	5.57164e-05	0.0548806	0	0.0548806
beta_lactam__OXA-101	0.00304569	5.52183e-05	0.0203678	0	0.05439
quinolone__QnrB55	0.00101523	5.51124e-05	0.0542857	0	0.0542857
beta_lactam__SHV-180	0.00101523	5.31895e-05	0.0523916	0	0.0523916
beta_lactam__ACT-18	0.00203046	5.18858e-05	0.0335085	0	0.0511075
beta_lactam__ADC-17	0.00203046	5.13486e-05	0.0316229	0	0.0505784
aminoglycoside__AAC(6')-Ij	0.00101523	5.1321e-05	0.0505512	0	0.0505512
quinolone__QnrB24	0.00101523	5.10164e-05	0.0502512	0	0.0502512
quinolone__QnrB3	0.00101523	5.10164e-05	0.0502512	0	0.0502512
beta_lactam__TEM-220	0.00101523	5.02326e-05	0.0494791	0	0.0494791
beta_lactam__OXA-23	0.00101523	4.92005e-05	0.0484624	0	0.0484624
beta_lactam__OKP-B-8	0.00101523	4.89969e-05	0.0482619	0	0.0482619
beta_lactam__CTX-M-129	0.00101523	4.88643e-05	0.0481313	0	0.0481313
beta_lactam__CTX-M-84	0.00101523	4.72509e-05	0.0465422	0	0.0465422
macrolide-lincosamide-streptogramin__lin	0.00101523	4.62616e-05	0.0455676	0	0.0455676
beta_lactam__OXY-2-1	0.00101523	4.61692e-05	0.0454767	0	0.0454767
beta_lactam__LEN-12	0.00101523	4.57512e-05	0.045065	0	0.045065
beta_lactam__GOB-15	0.00101523	4.52732e-05	0.0445941	0	0.0445941
beta_lactam__IMP-44	0.00101523	4.39395e-05	0.0432804	0	0.0432804
fosfomycin__FosA4	0.00101523	4.30697e-05	0.0424236	0	0.0424236
beta_lactam__RSD2-1	0.00101523	4.25136e-05	0.0418759	0	0.0418759
beta_lactam__ACT-23	0.00203046	4.24495e-05	0.029578	0	0.0418128
beta_lactam__TEM-217	0.00101523	4.22158e-05	0.0415826	0	0.0415826
beta_lactam__OXA-408	0.00101523	4.16343e-05	0.0410098	0	0.0410098
beta_lactam__OXA-153	0.00101523	4.06002e-05	0.0399912	0	0.0399912
beta_lactam__IMP-4	0.00101523	4.05852e-05	0.0399764	0	0.0399764
beta_lactam__TEM-72	0.00101523	4.03137e-05	0.039709	0	0.039709
beta_lactam__ACT-19	0.00101523	3.96748e-05	0.0390797	0	0.0390797
quinolone__QnrB61	0.00101523	3.92621e-05	0.0386732	0	0.0386732
macrolide-lincosamide-streptogramin__vgb(B)	0.00203046	3.90656e-05	0.0195758	0	0.0384796
beta_lactam__GOB-12	0.00203046	3.87833e-05	0.0193736	0	0.0382016
beta_lactam__KPC-19	0.00101523	3.83036e-05	0.0377291	0	0.0377291
beta_lactam__ADC-14	0.00101523	3.75105e-05	0.0369479	0	0.0369479
beta_lactam__FRI-3	0.00101523	3.72946e-05	0.0367352	0	0.0367352
quinolone__QnrB35	0.00101523	3.67582e-05	0.0362068	0	0.0362068
beta_lactam__PLA-2a	0.00203046	3.65443e-05	0.020482	0	0.0359961
trimethoprim__dfrA6	0.00101523	3.65101e-05	0.0359624	0	0.0359624
beta_lactam__OXA-460	0.00101523	3.51483e-05	0.0346211	0	0.0346211
beta_lactam__PDC-91	0.00101523	3.49799e-05	0.0344552	0	0.0344552
beta_lactam__OXA-255	0.00101523	3.33334e-05	0.0328334	0	0.0328334
beta_lactam__OXA-7	0.00101523	3.33148e-05	0.032815	0	0.032815
beta_lactam__OXA-250	0.00101523	3.25724e-05	0.0320838	0	0.0320838
beta_lactam__OXA-75	0.00101523	3.25724e-05	0.0320838	0	0.0320838
beta_lactam__CTX-M-152	0.00101523	3.24819e-05	0.0319946	0	0.0319946
beta_lactam__CIA-2	0.00101523	3.22594e-05	0.0317755	0	0.0317755
beta_lactam__ADC-31	0.00101523	3.21045e-05	0.0316229	0	0.0316229
quinolone__QnrB27	0.00101523	3.20885e-05	0.0316072	0	0.0316072
beta_lactam__FRI-1	0.00101523	3.20399e-05	0.0315593	0	0.0315593
beta_lactam__CTX-M-124	0.00101523	3.15006e-05	0.0310281	0	0.0310281
beta_lactam__TEM-78	0.00101523	3.1285e-05	0.0308157	0	0.0308157
beta_lactam__CTX-M-13	0.00101523	3.08241e-05	0.0303618	0	0.0303618
beta_lactam__CMY-37	0.00101523	3.0687e-05	0.0302267	0	0.0302267
beta_lactam__CMY-46	0.00101523	3.0687e-05	0.0302267	0	0.0302267
beta_lactam__OXA-111	0.00101523	3.06646e-05	0.0302046	0	0.0302046
beta_lactam__CMY-84	0.00203046	3.04072e-05	0.0151133	0	0.0299511
beta_lactam__CMY-115	0.00101523	2.99193e-05	0.0294705	0	0.0294705
beta_lactam__OXA-67	0.00101523	2.98651e-05	0.0294172	0	0.0294172
beta_lactam__CMY-104	0.00203046	2.97875e-05	0.0151133	0	0.0293407
vancomycin__vanTG	0.00406091	2.89292e-05	0.00926141	0	0.0284953
beta_lactam__OXA-229	0.00101523	2.85904e-05	0.0281616	0	0.0281616
beta_lactam__OXA-273	0.00101523	2.71015e-05	0.026695	0	0.026695
defensin__Streptococcus agalactiae mprF	0.00203046	2.69836e-05	0.0134082	0	0.0265789
beta_lactam__OXA-253	0.00101523	2.68581e-05	0.0264552	0	0.0264552
beta_lactam__TEM-168	0.00101523	2.66338e-05	0.0262342	0	0.0262342
beta_lactam__SHV-89	0.00101523	2.65947e-05	0.0261958	0	0.0261958
beta_lactam__TEM-21	0.00101523	2.61668e-05	0.0257743	0	0.0257743
beta_lactam__VIM-16	0.00101523	2.58546e-05	0.0254667	0	0.0254667
beta_lactam__OXA-59	0.00101523	2.56743e-05	0.0252892	0	0.0252892
beta_lactam__PDC-90	0.00101523	2.55971e-05	0.0252132	0	0.0252132
beta_lactam__OKP-B-19	0.00101523	2.51614e-05	0.024784	0	0.024784
beta_lactam__IMP-13	0.00101523	2.50858e-05	0.0247095	0	0.0247095
beta_lactam__ADC-73	0.00101523	2.47124e-05	0.0243417	0	0.0243417
polymyxin__mcr-3.6	0.00101523	2.42453e-05	0.0238816	0	0.0238816
quinolone__QnrB60	0.00101523	2.42092e-05	0.0238461	0	0.0238461
beta_lactam__MIR-13	0.00101523	2.40595e-05	0.0236986	0	0.0236986
beta_lactam__CMY-45	0.00101523	2.37621e-05	0.0234057	0	0.0234057
beta_lactam__imiH	0.00101523	2.35892e-05	0.0232354	0	0.0232354
beta_lactam__OXA-436	0.00101523	2.3505e-05	0.0231524	0	0.0231524
beta_lactam__IMP-27	0.00101523	2.31692e-05	0.0228216	0	0.0228216
beta_lactam__IMP-45	0.00101523	2.31097e-05	0.022763	0	0.022763
beta_lactam__OXA-26	0.00101523	2.30387e-05	0.0226932	0	0.0226932
beta_lactam__OXA-72	0.00101523	2.30387e-05	0.0226932	0	0.0226932
beta_lactam__KPC-24	0.00101523	2.29784e-05	0.0226338	0	0.0226338
beta_lactam__OKP-B-9	0.00101523	2.28889e-05	0.0225456	0	0.0225456
beta_lactam__IND-2	0.00101523	2.28333e-05	0.0224908	0	0.0224908
beta_lactam__CTX-M-35	0.00101523	2.27102e-05	0.0223695	0	0.0223695
beta_lactam__OXY-1-2	0.00101523	2.27102e-05	0.0223695	0	0.0223695
beta_lactam__OXA-196	0.00101523	2.2444e-05	0.0221073	0	0.0221073
beta_lactam__OXA-90	0.00101523	2.2444e-05	0.0221073	0	0.0221073
beta_lactam__LEN-13	0.00101523	2.21703e-05	0.0218377	0	0.0218377
beta_lactam__OXA-421	0.00101523	2.17552e-05	0.0214289	0	0.0214289
beta_lactam__TEM-129	0.00101523	2.15023e-05	0.0211797	0	0.0211797
beta_lactam__LEN-17	0.00101523	2.11372e-05	0.0208201	0	0.0208201
pleuromutilin_tiamulin__salE	0.00101523	2.11126e-05	0.0207959	0	0.0207959
beta_lactam__OXA-291	0.00101523	2.09102e-05	0.0205966	0	0.0205966
beta_lactam__OXA-272	0.00101523	2.08934e-05	0.02058	0	0.02058
beta_lactam__OXA-104	0.00101523	2.08172e-05	0.0205049	0	0.0205049
beta_lactam__OXA-93	0.00101523	2.08172e-05	0.0205049	0	0.0205049
beta_lactam__OXA-98	0.00101523	2.08172e-05	0.0205049	0	0.0205049
beta_lactam__CTX-M-75	0.00101523	2.07939e-05	0.020482	0	0.020482
beta_lactam__OXY-6-3	0.00101523	2.07939e-05	0.020482	0	0.020482
beta_lactam__CIA-4	0.00101523	2.07594e-05	0.020448	0	0.020448
beta_lactam__OXA-181	0.00101523	2.0756e-05	0.0204447	0	0.0204447
beta_lactam__CTX-M-8	0.00101523	2.05899e-05	0.0202811	0	0.0202811
beta_lactam__CTX-M-95	0.00101523	2.05558e-05	0.0202475	0	0.0202475
quinolone__QnrB50	0.00101523	2.03234e-05	0.0200186	0	0.0200186
beta_lactam__PLA-3	0.00101523	2.00889e-05	0.0197875	0	0.0197875
beta_lactam__OKP-B-2	0.00101523	1.99437e-05	0.0196446	0	0.0196446
beta_lactam__TEM-70	0.00101523	1.98171e-05	0.0195198	0	0.0195198
beta_lactam__PDC-82	0.00101523	1.94545e-05	0.0191626	0	0.0191626
beta_lactam__OXA-155	0.00101523	1.92595e-05	0.0189706	0	0.0189706
beta_lactam__IMP-7	0.00101523	1.90709e-05	0.0187849	0	0.0187849
beta_lactam__IND-2a	0.00101523	1.88615e-05	0.0185786	0	0.0185786
beta_lactam__GOB-9	0.00101523	1.88085e-05	0.0185264	0	0.0185264
beta_lactam__IND-5	0.00101523	1.85621e-05	0.0182836	0	0.0182836
beta_lactam__PDC-74	0.00101523	1.77727e-05	0.0175061	0	0.0175061
beta_lactam__OXA-126	0.00101523	1.72716e-05	0.0170126	0	0.0170126
beta_lactam__OXA-69	0.00101523	1.72716e-05	0.0170126	0	0.0170126
beta_lactam__FOX-3	0.00101523	1.72609e-05	0.017002	0	0.017002
beta_lactam__MIR-12	0.00101523	1.67874e-05	0.0165356	0	0.0165356
beta_lactam__OXA-308	0.00101523	1.64277e-05	0.0161813	0	0.0161813
beta_lactam__TTU-1	0.00101523	1.61857e-05	0.0159429	0	0.0159429
beta_lactam__IMP-31	0.00101523	1.60536e-05	0.0158128	0	0.0158128
beta_lactam__CMY-102	0.00101523	1.5882e-05	0.0156438	0	0.0156438
beta_lactam__KPC-22	0.00101523	1.58528e-05	0.015615	0	0.015615
beta_lactam__OXY-5-1	0.00101523	1.58046e-05	0.0155676	0	0.0155676
beta_lactam__OXY-1-4	0.00101523	1.58046e-05	0.0155676	0	0.0155676
beta_lactam__ORN-4	0.00101523	1.57503e-05	0.0155141	0	0.0155141
beta_lactam__PDC-85	0.00101523	1.54503e-05	0.0152186	0	0.0152186
beta_lactam__CMY-101	0.00101523	1.53435e-05	0.0151133	0	0.0151133
beta_lactam__CMY-74	0.00101523	1.53435e-05	0.0151133	0	0.0151133
beta_lactam__CMY-55	0.00101523	1.53435e-05	0.0151133	0	0.0151133
beta_lactam__CMY-98	0.00101523	1.50582e-05	0.0148323	0	0.0148323
beta_lactam__ADC-41	0.00101523	1.48927e-05	0.0146693	0	0.0146693
beta_lactam__ACT-32	0.00101523	1.46541e-05	0.0144343	0	0.0144343
beta_lactam__OXA-56	0.00101523	1.45861e-05	0.0143673	0	0.0143673
beta_lactam__OXA-304	0.00101523	1.42121e-05	0.0139989	0	0.0139989
beta_lactam__OXA-65	0.00101523	1.38486e-05	0.0136408	0	0.0136408
beta_lactam__OXA-71	0.00101523	1.38486e-05	0.0136408	0	0.0136408
beta_lactam__SHV-80	0.00101523	1.37522e-05	0.0135459	0	0.0135459
beta_lactam__OXY-2-5	0.00101523	1.35625e-05	0.0133591	0	0.0133591
beta_lactam__ORN-3	0.00101523	1.3333e-05	0.013133	0	0.013133
aminoglycoside__APH(4)-Ib	0.00101523	1.32463e-05	0.0130476	0	0.0130476
beta_lactam__ACT-21	0.00101523	1.24211e-05	0.0122348	0	0.0122348
beta_lactam__BIL-1	0.00101523	1.20298e-05	0.0118493	0	0.0118493
beta_lactam__MIR-15	0.00101523	1.20298e-05	0.0118493	0	0.0118493
beta_lactam__MIR-4	0.00101523	1.20298e-05	0.0118493	0	0.0118493
beta_lactam__FOX-1	0.00101523	1.17406e-05	0.0115645	0	0.0115645
polymyxin__mcr-3.10	0.00101523	1.12047e-05	0.0110366	0	0.0110366
beta_lactam__FOX-8	0.00101523	1.02961e-05	0.0101417	0	0.0101417
multidrug__hp1181	0.00101523	1.00311e-05	0.00988065	0	0.00988065
multidrug__mdeA	0.00101523	8.56492e-06	0.00843645	0	0.00843645
