# Supplementary material for: Global health risk assessment of antibiotic resistance in agricultural soils
Source: Research Square preprint supplement (doi:10.21203/rs.3.rs-7635655/v1), 2025-10-13
Supplement: Supplementary file 11 [file f6ed86670e11ec8e41cbc732.xlsx]

## Sheet: Supplementary Table 9
Supplementary Table 9 Specific covariate information collected in this study
Climate Factors	Number	Covariate name	Abbreviation	Layer Groups Units	Resolution	Unit	databases	Paper
	1	WC01 / BIO01 = Annual mean temperature	bio1	climate	30″	℃	WorldClim	Fick, S.E. and R.J. Hijmans, 2017. WorldClim 2: new 1km spatial resolution climate surfaces for global land areas. International Journal of Climatology 37 (12): 4302-4315.
	2	WC02 / BIO02 = Mean diurnal range (ean of monthly (max temp - min temp))	bio2	climate	30″	℃	WorldClim
	3	WC03 / BIO03 = Isothermality (BIO2/BIO7) (*100)	bio3	climate	30″	℃	WorldClim
	4	WC04 / BIO04 = Temperature seasonality (standard deviation *100)	bio4	climate	30″	℃	WorldClim
	5	WC05 / BIO05 = Max temperature of warmest month	bio5	climate	30″	℃	WorldClim
	6	WC06 / BIO06 = Min temperature of coldest month	bio6	climate	30″	℃	WorldClim
	7	WC07 / BIO07 = Temperature annual range (BIO5-BIO6)	bio7	climate	30″	℃	WorldClim
	8	WC08 / BIO08 = Mean temperature of wettest quarter	bio8	climate	30″	℃	WorldClim
	9	WC09 / BIO09 = Mean temperature of diest quarter	bio9	climate	30″	℃	WorldClim
	10	WC10 / BIO10 = Mean temperature of warmest quarter	bio10	climate	30″	℃	WorldClim
	11	WC11 / BIO11 = Mean temperature of coldest quarter	bio11	climate	30″	℃	WorldClim
	12	WC12 / BIO12 = Annual precipitation	bio12	climate	30″	mm	WorldClim
	13	WC13 / BIO13 = Precipitation of wettest month	bio13	climate	30″	mm	WorldClim
	14	WC14 / BIO14 = Precipitation of driest month	bio14	climate	30″	mm	WorldClim
	15	WC15 / BIO15 = Precipitation seasonality (coefficient of variation)	bio15	climate	30″	mm	WorldClim
	16	WC16 / BIO16 = Precipitation of wettest quarter	bio16	climate	30″	mm	WorldClim
	17	WC17 / BIO17 = Precipitation of driest quarter	bio17	climate	30″	mm	WorldClim
	18	WC18 / BIO18 = Precipitation of warmest quarter	bio18	climate	30″	mm	WorldClim
	19	WC19 / BIO19 = Precipitation of coldest quarter	bio19	climate	30″	mm	WorldClim
Soil Factors	20	Bulk density of the fine earth fraction	bdod	soil	0.25 km	kg·dm-3	SoilGrids	POGGIO L, DE SOUSA L M, BATJES N H, et al. SoilGrids 2.0: producing soil information for the globe with quantified spatial uncertainty [J]. Soil, 2021, 7(1): 217-40.
	21	Cation exchange capacity of the soil	cec	soil	0.25 km	cmol(+)1kg-1	SoilGrids
	22	Vol. fraction of coarse fragments (>2 mm)	cfvo	soil	0.25 km	%	SoilGrids
	23	pH (H2O)	phh2o	soil	0.25 km	—	SoilGrids
	24	pH (KCL)	phkcl	soil	0.25 km	—	SoilGrids
	25	Sand (> 0.05 mm) in fine earth	sand	soil	0.25 km	%	SoilGrids
	26	Silt (0.002-0.05 mm) in fine earth	silt	soil	0.25 km	%	SoilGrids
	27	Clay (< 0.002 mm) in fine earth	clay	soil	0.25 km	%	SoilGrids
	28	Soil organic carbon in fine earth	soc	soil	0.25 km	g·kg-1	SoilGrids
	29	Organic carbon stocks	ocs	soil	0.25 km	kg·m-2	SoilGrids
	30	Global apatite P	apatitep	soil	0.5°	g·m-2	DAAC	Yang, X., W.M. Post, P.E. Thornton, and A.K. Jain. 2014. Global Gridded Soil Phosphorus Distribution Maps at 0.5-degree Resolution. ORNL DAAC, Oak Ridge, Tennessee, USA.
	31	Global labile inorganic P	inorganicp	soil	0.5°	g·m-2	DAAC
	32	Global occluded P	occludedp	soil	0.5°	g·m-2	DAAC
	33	Global organic P	organicp	soil	0.5°	g·m-2	DAAC
	34	Global secondary mineral P	mineralp	soil	0.5°	g·m-2	DAAC
	35	Global total P	totalp	soil	0.5°	g·m-2	DAAC
	36	Soil microbial biomass carbon in top 30 cm soil profile	smc30	soil	0.5°	g·m-2	DAAC	Xu, X., P.E. Thornton, and P. Potapov. 2014. A Compilation of Global Soil Microbial Biomass Carbon, Nitrogen, and Phosphorus Data. ORNL DAAC, Oak Ridge, Tennessee, USA.
	37	Soil microbial biomass carbon in top 100 cm soil profile	smc100	soil	0.5°	g·m-2	DAAC
	38	Soil microbial biomass nitrogen in top 30 cm soil profile	smn30	soil	0.5°	g·m-2	DAAC
	39	Soil microbial biomass nitrogen in top 100 cm soil profile	smn100	soil	0.5°	g·m-2	DAAC
	40	C:N ratio of soil microbial biomass in top 30 cm soil profile	cn30	soil	0.5°	g·m-2	DAAC
	41	C:N ratio of soil microbial biomass in top 100 cm soil profile	cn100	soil	0.5°	g·m-2	DAAC
Agricultural Factors	42	Global cattle distribution	cattle	agriculture	5′	—	FAO	Gilbert M, G Nicolas, G Cinardi, S Vanwambeke, TP Van Boeckel, GRW Wint, TP Robinson (2017) New global gridded distribution data on cattle, buffaloes, sheep, goat, horses pigs, chickens and ducks in 2010. Nature Scientific Data.
	43	Global chicken distribution	chicken	agriculture	5′	—	FAO
	44	Global duck distribution	duck	agriculture	5′	—	FAO
	45	Global goat distribution	goat	agriculture	5′	—	FAO
	46	Global horse distribution	horse	agriculture	5′	—	FAO
	47	Global pig distribution	pig	agriculture	5′	—	FAO
	48	Global sheep distribution	sheep	agriculture	5′	—	FAO
	49	Actual evaporation	ea	agriculture	0.25°	mm·day-1	GLEAM	Martens, B., Miralles, D.G., Lievens, H., van der Schalie, R., de Jeu, R.A.M., Fernández-Prieto, D., Beck, H.E., Dorigo, W.A., and Verhoest, N.E.C.: GLEAM v3: satellite-based land evaporation and root-zone soil moisture, Geoscientific Model Development, 10, 1903–1925
	50	Potential evaporation	ep	agriculture	0.25°	mm·day-1	GLEAM
	51	Root-Zone soil moisture	smroot	agriculture	0.25°	—	GLEAM
	52	Surface soil moisture	smsurf	agriculture	0.25°	—	GLEAM
Social Factors	53	Phosphorus in manure production	pmp	social	0.5°	kg·ha-1	SEDAC	Potter, P., N. Ramankutty, E.M. Bennett, and S.D. Donner. 2010. Characterizing the Spatial Patterns of Global Fertilizer Application and Manure Production. Earth Interactions 14 (2): 1-22.
	54	Phosphorus fertilizer application	pfa	social	0.5°	kg·ha-1	SEDAC
	55	Nitrogen in manure production	nmp	social	0.5°	kg·ha-1	SEDAC
	56	Nitrogen fertilizer application	nfa	social	0.5°	kg·ha-1	SEDAC
	57	Cropland and pasture area	land	social	5′	—	EARTHSTAT	Ramankutty, N., A.T. Evan, C. Monfreda, and J.A. Foley (2008), Farming the planet: 1. Geographic distribution of global agricultural lands in the year 2000. Global Biogeochemical Cycles 22, GB1003.
	58	Population of the world	population	social	30″	—	SEDAC	Center for International Earth Science Information Network - CIESIN - Columbia University. 2018. Gridded Population of the World, Version 4 (GPWv4): Population Count, Revision 11. Palisades, New York: NASA Socioeconomic Data and Applications Center (SEDAC).
	59	Development threat index	dti	social	50 km	—	SEDAC	Oakleaf, J. R., C. M. Kennedy, S. Baruch-Mordo, P. C. West, J. S. Gerber, L. Jarvis and J. Kiesecker. 2015. A World at Risk: Aggregating Development Trends to Forecast Global Habitat Conversion. PLoS ONE 10(10): e0138334.
	60	Global human influence index	ghii	social	1 km	—	SEDAC	Wildlife Conservation Society - WCS, and Center for International Earth Science Information Network - CIESIN - Columbia University. 2005. Last of the Wild Project, Version 2, 2005 (LWP-2): Global Human Influence Index (HII) Dataset (Geographic). Palisades, New York: NASA Socioeconomic Data and Applications Center.
	61	GDP of each grid cell	gdp	social	5′	Billions	DRYAD	Nordhaus, W.D. 2006. Geography and Macroeconomics: New Data and New Findings. Proceedings of the National Academy of Sciences of the United States of America (PNAS) 103(10): 3510-3517.
	62	GDP per capita	gdppc	social	5′	Billions	DRYAD	Kummu, M., Taka, M. & Guillaume, J. Gridded global datasets for Gross Domestic Product and Human Development Index over 1990–2015. Sci Data 5, 180004 (2018).
	63	Human development index	hdi	social	5′	—	DRYAD
	64	Antibiotic consumption in clinical settings	acc	social	0.25°	DDD/1000POP	ResistanceMap	—
	65	Antibiotic consumption in livestock	acl	social	0.25°	mg/pcu	ResistanceMap	T.P. Van Boeckel, C. Brower, M. Gilbert, B.T. Grenfell, S.A. Levin, T.P. Robinson, A. Teillant, R. Laxminarayan, Global trends in antimicrobial use in food animals, Proc. Natl. Acad. Sci. U.S.A. 112 (18) 5649-5654,https://doi.org/10.1073/pnas.1503141112 (2015).
